# Supplementary material for: An integrin-targeting AAV developed using a novel computational rational design methodology presents improved targeting of the skeletal muscle and reduced liver tropism
Source: Research Square preprint supplement (doi:10.21203/rs.3.rs-3466229/v1), 2023-10-27
Supplement: Supplementary file 1 [file 937a17b430e88e8bd9e1faa8.xlsx]

## Sheet: SGCA_KO_vs_WT
Differential gene expression analysis, comparison between SGCA_KO and WT
ensembl_gene_id	entrezgene_id	external_gene_name	baseMean	log2FoldChange	lfcSE	stat	pvalue	padj
ENSMUSG00000000001	14679	Gnai3	359.719184391503	0.687505167870883	0.177408802430576	3.87525961762758	0.000106511079640083	0.000448046607312275
ENSMUSG00000000003	54192	Pbsn	0	NA	NA	NA	NA	NA
ENSMUSG00000000028	12544	Cdc45	44.0419747455079	1.27723757184037	0.312891337219977	4.08204836601922	4.46405034657201e-05	0.000203169499872253
ENSMUSG00000000031	14955	H19	13679.2380981477	1.58956591888372	0.234545517212381	6.77721722323249	1.225126207987e-11	1.73521655630214e-10
ENSMUSG00000000037	107815	Scml2	3.93993255149214	1.68702925062568	0.962968094334883	1.75190565559797	0.0797900319126139	0.154316541268629
ENSMUSG00000000049	11818	Apoh	7.41455405921387	-0.135191736746541	0.689049928131371	-0.19620020440778	0.844453468072242	0.902759613530776
ENSMUSG00000000056	67608	Narf	1667.61645947526	-1.22392299896812	0.162219496188931	-7.54485760171923	4.5278196084067e-14	9.13901140940697e-13
ENSMUSG00000000058	12390	Cav2	447.432582860775	-0.362143368388896	0.16375376555433	-2.2115116996729	0.0270004225941929	0.0621571987605905
ENSMUSG00000000078	23849	Klf6	854.563107736782	0.367569449580567	0.306047722784352	1.20102004431369	0.22974342610926	0.358494860492372
ENSMUSG00000000085	29871	Scmh1	453.023976870613	-0.717605124546063	0.108205962962363	-6.63184453887875	3.31517646310325e-11	4.40200750977008e-10
ENSMUSG00000000088	12858	Cox5a	1806.45868261664	-0.626227791459987	0.154387758243911	-4.05620107826577	4.98773244026049e-05	0.000224573279722281
ENSMUSG00000000093	21385	Tbx2	96.5637258968969	0.134776093378812	0.208197820381404	0.647346322511501	0.517407827750452	0.651377877355225
ENSMUSG00000000094	21387	Tbx4	50.8209780651244	0.706455564112088	0.256821151356195	2.75076862003581	0.00594556224613834	0.016681572058328
ENSMUSG00000000103	22768	Zfy2	0	NA	NA	NA	NA	NA
ENSMUSG00000000120	18053	Ngfr	25.2562761092902	1.59127856886258	0.356824455185249	4.45955580044662	8.21296895179303e-06	4.33568313638361e-05
ENSMUSG00000000125	22415	Wnt3	0.609283897188893	0.172193560805437	1.57306793963416	0.109463524407905	0.912834851183347	NA
ENSMUSG00000000126	216795	Wnt9a	196.15089985442	-0.820438508716388	0.174502017447083	-4.70159898847692	2.58132071581394e-06	1.50355730105974e-05
ENSMUSG00000000127	14158	Fer	125.607251219006	-0.182483926777719	0.130569383155871	-1.39760120149969	0.16223285736201	0.272832930024181
ENSMUSG00000000131	74204	Xpo6	426.673489038912	0.459943638233786	0.137733130747395	3.33938273048719	0.000839647937346056	0.00289162177353401
ENSMUSG00000000134	209446	Tfe3	262.416019697795	0.935223794726822	0.124065859256802	7.53812370566037	4.76781476930695e-14	9.57652307659626e-13
ENSMUSG00000000142	12006	Axin2	75.307857056433	-0.668038146941795	0.28339023396714	-2.35730828684539	0.0184079575856604	0.0447348101326992
ENSMUSG00000000148	231841	Brat1	134.417021675833	0.346780541476599	0.129602527140488	2.67572360761679	0.00745681119248201	0.0203806319701153
ENSMUSG00000000149	14673	Gna12	617.498941655761	0.241903672698872	0.116507080101867	2.07630019126191	0.0378661956369571	0.0830067609495173
ENSMUSG00000000154	18400	Slc22a18	10.8385502572441	1.20394906611583	0.444097847374375	2.71099955389087	0.00670807165029562	0.0185718236578629
ENSMUSG00000000157	16415	Itgb2l	0.176427290292336	0.569141133344957	4.2231814373141	0.13476596774088	0.892796914124522	NA
ENSMUSG00000000159	72058	Igsf5	0	NA	NA	NA	NA	NA
ENSMUSG00000000167	72614	Pih1d2	5.48520932499515	0.703934616640309	0.660250745664043	1.0661625469765	0.286350169416243	0.423625577267046
ENSMUSG00000000168	235339	Dlat	3568.07287273512	-0.632037485721062	0.142577204939457	-4.4329490537386	9.2952836300924e-06	4.85692710570345e-05
ENSMUSG00000000171	66925	Sdhd	2849.08072447999	-0.334588544462699	0.137212088559673	-2.43847716316328	0.0147492905939417	0.0368651765385022
ENSMUSG00000000182	64654	Fgf23	0.815370329447379	-3.05851733597388	1.63530326044488	-1.87030589980101	0.0614413507346732	0.123844224955022
ENSMUSG00000000183	14177	Fgf6	101.12774967371	-1.34896781978446	0.269164546844727	-5.01168462042156	5.3955582636933e-07	3.53888175360253e-06
ENSMUSG00000000184	12444	Ccnd2	279.231843575336	-0.0485025282125916	0.159614533809543	-0.303872880839701	0.761224739364488	0.844175828920161
ENSMUSG00000000194	277463	Gpr107	547.128997129616	0.100122351785007	0.0938630489307499	1.06668548407025	0.286113884172367	0.423367195018607
ENSMUSG00000000197	338370	Nalcn	7.35948559333835	-1.9133391008998	0.561267382327699	-3.40896186228526	0.000652105954837609	0.00230428661133289
ENSMUSG00000000202	72014	Btbd17	6.25742290085621	2.00884213107592	0.799925334871482	2.51128704580742	0.0120291839245022	0.0309369053183752
ENSMUSG00000000204	20558	Slfn4	38.6025383348119	3.49698499148593	0.901843462054861	3.87759643288649	0.000105493518217975	0.000444492010516465
ENSMUSG00000000214	21823	Th	1.56067827529492	3.75980586505419	1.48170636471482	2.53748377856083	0.0111652542373276	0.0289790376980915
ENSMUSG00000000215	16334	Ins2	0.230181709173521	0.0914756108410825	4.31089754035128	0.0212196207367129	0.983070462721244	NA
ENSMUSG00000000216	20278	Scnn1g	0.0565294071429272	0.569152411104117	4.32794324778021	0.131506440477479	0.895374692057978	NA
ENSMUSG00000000223	13497	Drp2	130.953919834013	-0.329702378333483	0.242516617362486	-1.35950427611598	0.173986848395092	0.288341051204347
ENSMUSG00000000244	27027	Tspan32	23.1057125044415	2.70699772766599	0.398327140046382	6.79591585788201	1.07626583298238e-11	1.53705379668059e-10
ENSMUSG00000000247	16870	Lhx2	3.07379113001885	0.698568925907577	0.855150424176756	0.816895959070688	0.413987887285836	0.557171659393729
ENSMUSG00000000248	70809	Clec2g	0.969645337492934	2.87218476036907	1.59572063321328	1.7999295745054	0.0718717591385973	0.141221702167068
ENSMUSG00000000253	66355	Gmpr	1645.06614087173	-0.619533649582387	0.162495562200535	-3.81261888751044	0.000137502052031219	0.000564358153407561
ENSMUSG00000000263	14654	Glra1	0	NA	NA	NA	NA	NA
ENSMUSG00000000266	23947	Mid2	92.5438392898417	0.146956325943949	0.153822531550087	0.955362809746097	0.339394254423337	0.480588726264373
ENSMUSG00000000275	217069	Trim25	323.617164927785	0.485394148299743	0.147975252176423	3.28023869640738	0.00103719293808295	0.00350577823065861
ENSMUSG00000000276	56077	Dgke	108.218325502702	-0.285450976397814	0.240958343289773	-1.18464865130042	0.236156392645762	0.3667177258416
ENSMUSG00000000278	74617	Scpep1	337.937821710225	1.4426959864209	0.162687871286795	8.86787672006374	7.45538011062634e-19	2.87716242171887e-17
ENSMUSG00000000282	17428	Mnt	189.256212851824	0.0621744045671522	0.171144491478316	0.363286039942628	0.716391220544214	0.812246383856468
ENSMUSG00000000290	16414	Itgb2	489.598381439639	4.35754060216512	0.253545247642029	17.1864416418381	3.3550225139018e-66	1.7285075991622e-62
ENSMUSG00000000295	69692	Hddc2	98.7862219829281	0.258466357817413	0.192575745102501	1.34215426599981	0.179545981730377	0.295675530725556
ENSMUSG00000000296	21987	Tpd52l1	237.321025083173	-0.590905872836459	0.150361549274029	-3.92990013530356	8.49811489930393e-05	0.000365843225078035
ENSMUSG00000000301	18618	Pemt	21.8306525164522	0.726623239380001	0.348060025187521	2.08763772567253	0.0368305262325549	0.0812202765757616
ENSMUSG00000000303	12550	Cdh1	6.92488130862406	-1.94616166882107	0.603940997426433	-3.22243675642857	0.00127105222268153	0.00419705883752941
ENSMUSG00000000305	12561	Cdh4	75.8575323675745	-2.67242291838673	0.342134147370054	-7.81103826943126	5.67187884215352e-15	1.30453213369531e-13
ENSMUSG00000000308	12716	Ckmt1	0.325888834394297	0.652179738187516	2.67637584723943	0.243680176257835	0.807478527683938	NA
ENSMUSG00000000317	12029	Bcl6b	234.798094730058	-0.0464997886931659	0.318999936202386	-0.145767391826889	0.884105018451604	0.92805807967862
ENSMUSG00000000318	17312	Clec10a	141.030166364197	1.59032678550062	0.246837161356638	6.44281751078342	1.17275676948133e-10	1.43091601571766e-09
ENSMUSG00000000320	11684	Alox12	44.433750125141	-0.104255731885122	0.323688000454661	-0.322087107766374	0.747386704814694	0.835393242546034
ENSMUSG00000000326	12846	Comt	620.057171543601	0.0567331440001249	0.096476318871914	0.588052536244114	0.55649703016872	0.685124009661089
ENSMUSG00000000339	66368	Rtca	209.704682664329	-0.244509656559888	0.118192596926759	-2.06873918432815	0.0385705680565423	0.0842550632297249
ENSMUSG00000000340	13171	Dbt	403.827822970715	-0.661260796034489	0.142481932685645	-4.64101506464974	3.46701845553761e-06	1.9731653226103e-05
ENSMUSG00000000346	23994	Dazap2	1137.36809949169	0.10530386753796	0.0848974558065702	1.24036540951102	0.21484026908479	0.34028347285369
ENSMUSG00000000355	68995	Mcts1	306.012615093912	-0.00398931788782404	0.121811907749092	-0.0327498186469687	0.973874095641776	0.983707350406123
ENSMUSG00000000359	19700	Rem1	61.329931627168	0.827001474731115	0.274838812276338	3.00904180119801	0.00262073055313036	0.00801900745937794
ENSMUSG00000000365	30054	Rnf17	1.209980672453	2.19385968817681	1.32074733682821	1.66107447427862	0.0966984902990307	0.180487500052751
ENSMUSG00000000374	216131	Trappc10	714.845305257524	-0.799096795577029	0.128700034966101	-6.20898662372164	5.3327361289492e-10	5.81773563501245e-09
ENSMUSG00000000378	216527	Ccm2	308.759028512315	-0.124600607126897	0.101968046498117	-1.22195738180781	0.221723743974984	0.348906758997898
ENSMUSG00000000381	22373	Wap	0	NA	NA	NA	NA	NA
ENSMUSG00000000384	21379	Tbrg4	651.846425148321	-0.509353788457838	0.0839372717342161	-6.06826714681275	1.29297706223941e-09	1.32294254528129e-08
ENSMUSG00000000385	50528	Tmprss2	0.861911949543352	-2.17342193979272	1.49569561903713	-1.45311780828233	0.146191047396837	0.251163410150397
ENSMUSG00000000386	NA	Mx1	30.4687790780097	2.78148439400101	0.57763846838995	4.81526862598648	1.47002003405316e-06	8.8969670665984e-06
ENSMUSG00000000392	14089	Fap	281.01685837696	1.56395175924963	0.199830103445191	7.82640719434238	5.0200957623114e-15	1.16240599404172e-13
ENSMUSG00000000394	14526	Gcg	0.0989994799489256	0	4.32794324778021	0	1	NA
ENSMUSG00000000399	66108	Ndufa9	2450.50850270448	-0.414040869953589	0.130537937845045	-3.17180489280501	0.0015149474953564	0.00490495490719635
ENSMUSG00000000402	54156	Egfl6	15.7930181534014	-0.577317990069088	0.513618829208978	-1.12402029917442	0.261004414523176	0.395278706278276
ENSMUSG00000000409	16818	Lck	9.00882001853487	4.40417020823013	0.949826260135387	4.63681664013202	3.53816014204481e-06	2.00976858344155e-05
ENSMUSG00000000411	58864	Tssk3	0.156147198280558	-0.152168085452993	4.32794324778021	-0.0351594456630271	0.971952599894889	NA
ENSMUSG00000000416	30785	Cttnbp2	11.6377908827451	-0.431309219570508	0.467314668543713	-0.922952452818551	0.356031984033319	0.498478641684804
ENSMUSG00000000420	14423	Galnt1	979.451112760839	-0.633459743149896	0.09929579404783	-6.37952240801622	1.77641092790442e-10	2.11242218131877e-09
ENSMUSG00000000435	17877	Myf5	34.5627881912119	0.77750325849529	0.308887804305973	2.51710571818214	0.0118323319927361	0.030507959635982
ENSMUSG00000000439	67027	Mkrn2	411.333584821325	-1.23295141054437	0.145652928979424	-8.46499565222304	2.56162247823266e-17	8.17181362715458e-16
ENSMUSG00000000440	19016	Pparg	78.301004374024	-0.0940421831213996	0.237929028088265	-0.395253088187762	0.692656116808055	0.794229916957943
ENSMUSG00000000441	110157	Raf1	574.10751108791	-0.968821636919647	0.179426222018473	-5.39955434618637	6.68066444013751e-08	5.19137001441756e-07
ENSMUSG00000000486	54204	Septin1	33.3547570092366	1.50686741887246	0.303917676194981	4.95814339507425	7.11700273052597e-07	4.57905689262189e-06
ENSMUSG00000000486	100043580	Septin1	33.3547570092366	1.50686741887246	0.303917676194981	4.95814339507425	7.11700273052597e-07	4.57905689262189e-06
ENSMUSG00000000489	18591	Pdgfb	652.080777804652	0.306072090849708	0.11760402290909	2.6025648041505	0.00925293261076416	0.0246394153304856
ENSMUSG00000000530	11482	Acvrl1	375.796846444914	0.422594773245495	0.127712733746811	3.30894783039632	0.00093647285110782	0.00319622930036932
ENSMUSG00000000531	56149	Tamalin	143.174294245587	-0.0436953864488098	0.18730499363833	-0.233284685047864	0.815540350126566	0.882239135716969
ENSMUSG00000000532	11479	Acvr1b	637.530525838427	-0.948997837635336	0.169903132648481	-5.58552289673643	2.32998086013872e-08	1.95267367083118e-07
ENSMUSG00000000538	216810	Tom1l2	1298.59981429715	-0.684062373958349	0.10155908527529	-6.73560983839212	1.6324379045851e-11	2.26693263731063e-10
ENSMUSG00000000544	59290	Gpa33	0.116957234271917	0	4.32794324778021	0	1	NA
ENSMUSG00000000552	29813	Zfp385a	217.664534352372	0.584255923794454	0.140325711875297	4.16356999716249	3.13309915790984e-05	0.000147278529758681
ENSMUSG00000000555	16402	Itga5	589.154584769772	1.56272449565396	0.293801356645421	5.31898325282398	1.04348739008338e-07	7.86546749628321e-07
ENSMUSG00000000560	14395	Gabra2	0.16174283207461	1.32375474463968	4.32103856468093	0.306351060011292	0.759337366499545	NA
ENSMUSG00000000561	70465	Wdr77	183.245132696422	0.403296535422269	0.150243999930556	2.6842771465661	0.00726868238547136	0.0199245818834522
ENSMUSG00000000562	11542	Adora3	3.06091214759279	2.81172325859676	1.11259774308272	2.5271696586461	0.0114985940523229	0.0297841913311049
ENSMUSG00000000562	69296	Adora3	3.06091214759279	2.81172325859676	1.11259774308272	2.5271696586461	0.0114985940523229	0.0297841913311049
ENSMUSG00000000563	11950	Atp5pb	6799.14666444183	-0.427394683511081	0.131809078755899	-3.24252841720095	0.00118474132627206	0.00394492636157935
ENSMUSG00000000567	20682	Sox9	97.5011097416242	1.56427639267077	0.37746513217106	4.14416129954455	3.4105962922184e-05	0.000159265171836101
ENSMUSG00000000568	11991	Hnrnpd	638.006923790979	0.226673901388237	0.165807656775563	1.36708946858264	0.171597263870725	0.285022681860877
ENSMUSG00000000579	100040563	Dynlt1c	32.639906695111	0.167029379444974	0.259268486273514	0.644233249654443	0.519424192947975	0.653011250395931
ENSMUSG00000000581	57316	C1d	475.361252953916	-0.150891899052564	0.144609711149953	-1.04344236533393	0.296743460885269	0.434602319801267
ENSMUSG00000000594	14667	Gm2a	573.93873320392	1.52758890040132	0.148808946897725	10.2654372082293	1.0086304379336e-24	8.02542705209873e-23
ENSMUSG00000000600	79264	Krit1	281.547666225407	-0.092425934461314	0.107821820498747	-0.857209923128576	0.391328879354825	0.53495890850708
ENSMUSG00000000605	12727	Clcn4	749.843900577642	-0.492206655575526	0.0921504510719754	-5.34133745250016	9.2263323871987e-08	7.01609807510668e-07
ENSMUSG00000000606	669149	Vmn2r88	0	NA	NA	NA	NA	NA
ENSMUSG00000000617	108072	Grm6	0	NA	NA	NA	NA	NA
ENSMUSG00000000627	20355	Sema4f	4.43393884441103	0.675351441502726	0.687697778773077	0.98204685597156	0.326076765080457	0.466846600998893
ENSMUSG00000000628	15277	Hk2	4041.83275800486	-1.23227809543398	0.216637066136885	-5.68821447505825	1.28374530806634e-08	1.12535530655373e-07
ENSMUSG00000000631	360013	Myo18a	3419.4282668175	-0.713348681182693	0.122220328500677	-5.83657964213982	5.32832988700813e-09	4.93733013990393e-08
ENSMUSG00000000632	20370	Sez6	5.93678661427075	0.210016685715	0.697519760707664	0.301090660860889	0.763345362348807	0.845604848353093
ENSMUSG00000000673	107766	Haao	4.23256574749913	1.99355847376382	0.899179316464415	2.21708666698709	0.0266171697271234	0.0614114010005105
ENSMUSG00000000682	23833	Cd52	158.610304653828	4.24503441611476	0.275860941409945	15.3883126564351	1.96079063858062e-53	2.52549834249184e-50
ENSMUSG00000000686	67477	Abhd15	6.85490627148391	0.288727261835777	0.53990827017415	0.534770956078607	0.592808249002288	0.716174949150197
ENSMUSG00000000690	15414	Hoxb6	24.5071398758297	0.0964936485521455	0.414204745526725	0.232961233772054	0.81579150856605	0.882371878891994
ENSMUSG00000000693	16950	Loxl3	192.858570834673	1.6265047670792	0.176871801937366	9.19595294028375	3.71685314521896e-20	1.64371050679554e-18
ENSMUSG00000000701	27382	Tcl1b5	0	NA	NA	NA	NA	NA
ENSMUSG00000000706	12231	Btn1a1	0.0928276859660398	0.569145655227189	4.32794324778021	0.131504879487295	0.895375926824784	NA
ENSMUSG00000000708	18519	Kat2b	867.174871686	-1.06086070054092	0.146095100143552	-7.26143929193053	3.82992890862738e-13	6.780685133075e-12
ENSMUSG00000000711	19344	Rab5b	1262.0982098579	-0.657871322031607	0.112693175155846	-5.83772106094111	5.29196563452318e-09	4.90584020675905e-08
ENSMUSG00000000724	12957	Cryba1	0.139115662479491	-0.152161329576066	4.32794324778021	-0.0351578846728429	0.971953844615299	NA
ENSMUSG00000000730	54427	Dnmt3l	1.99957770321308	2.57431427054162	1.35837025981239	1.89514917007766	0.0580726420217104	0.118257016480574
ENSMUSG00000000731	11634	Aire	0.285608651931866	-0.873514647812108	3.12299925042197	-0.279703764800482	0.779704789684102	NA
ENSMUSG00000000732	50723	Icosl	54.6180916652531	0.573802165307271	0.247992045569985	2.31379262180947	0.0206791002885096	0.0494666162211962
ENSMUSG00000000738	234847	Spg7	1233.62687627867	-0.600544895478869	0.109435729736267	-5.48764920676406	4.07317928141573e-08	3.28918803414637e-07
ENSMUSG00000000739	57429	Sult5a1	50.1422410140047	0.686223423213796	0.227093009917225	3.02177254801425	0.00251299297507439	0.00772029803672228
ENSMUSG00000000740	270106	Rpl13	4411.96599595338	0.466132065428175	0.120938364632607	3.85429443207882	0.000116063854250385	0.00048417892882428
ENSMUSG00000000743	234852	Chmp1a	695.491543411109	-0.107049801962644	0.0697502432941128	-1.53475883247104	0.124843078470318	0.221811297451855
ENSMUSG00000000751	68275	Rpa1	782.687543813676	-0.0589883102837525	0.0960009466435325	-0.614455506389805	0.538914366255665	0.670052952877286
ENSMUSG00000000753	20317	Serpinf1	1928.10910671401	0.859720827342421	0.169695439145815	5.06625771246384	4.0571256545767e-07	2.72076945947011e-06
ENSMUSG00000000759	259279	Tubgcp3	191.044619566519	0.0237011494691766	0.143652662922241	0.164989280303185	0.868952419504227	0.919033690589844
ENSMUSG00000000766	18390	Oprm1	0.116957234271917	0	4.32794324778021	0	1	NA
ENSMUSG00000000776	67065	Polr3d	302.94699525073	-0.240140946315111	0.126323223801744	-1.90100394122301	0.0573014963862686	0.116998834591125
ENSMUSG00000000782	21414	Tcf7	25.1452812067836	1.71139023422209	0.386598655397185	4.42678785952796	9.56467144014704e-06	4.98756956069206e-05
ENSMUSG00000000787	13205	Ddx3x	2182.75597548658	-0.600031357001163	0.148543266380173	-4.03943828369492	5.35793635150797e-05	0.000239774923630567
ENSMUSG00000000791	16161	Il12rb1	2.21306617313891	2.10060601225252	1.28797485233126	1.63093713239074	0.102903585591269	0.189834132294769
ENSMUSG00000000792	114479	Slc5a5	5.79992450251267	1.6842256712789	0.719472713257566	2.34091667445344	0.019236459833342	0.0464796534465366
ENSMUSG00000000794	140493	Kcnn3	77.4252268418712	1.77598505615802	0.310291482892891	5.72360233545655	1.0428869935383e-08	9.27323356803419e-08
ENSMUSG00000000804	237898	Usp32	195.132756743292	-0.390667250796274	0.121393953258993	-3.21817718517485	0.00129008097333547	0.00425035790543523
ENSMUSG00000000805	12351	Car4	142.909933603794	0.336734567011691	0.210216169408444	1.60184902978337	0.109188997946141	0.19932384353566
ENSMUSG00000000811	232223	Txnrd3	105.836727646747	0.0090774164329719	0.150435056233042	0.0603410977485852	0.951883970290966	0.970005679659607
ENSMUSG00000000817	14103	Fasl	0.609863045767772	2.91613325012089	1.84025111576325	1.58463876214601	0.113048432710238	NA
ENSMUSG00000000823	269401	Zfp512b	246.659548708583	-0.475573534674219	0.15611539215411	-3.04629497522418	0.00231680423243116	0.00716564634878304
ENSMUSG00000000826	13002	Dnajc5	800.335696285164	0.0192113821484622	0.0901540176879807	0.213095130324109	0.831252762856973	0.893281375447489
ENSMUSG00000000827	66314	Tpd52l2	560.463792455834	0.110859744802985	0.104170680927076	1.06421253865655	0.287232428127299	0.424465217695065
ENSMUSG00000000838	14265	Fmr1	174.048220949428	0.263622786914914	0.151292891505157	1.74246644566198	0.0814268579169005	0.156879658877937
ENSMUSG00000000861	14025	Bcl11a	3.4641041437018	2.49073777301926	1.07134283202092	2.32487463263359	0.0200786647763324	0.0482032548546179
ENSMUSG00000000869	16189	Il4	9.75071240952009	0.71048160183275	0.468787089632415	1.51557416478737	0.129627063853278	0.228386493372587
ENSMUSG00000000876	59038	Pxmp4	216.895575511044	-0.0868147369555811	0.160580048121871	-0.540632151820592	0.588761152206366	0.712878368076897
ENSMUSG00000000881	53310	Dlg3	60.2575746620107	0.587252267292017	0.225469828892939	2.60457139731483	0.0091989252790882	0.0245304674109019
ENSMUSG00000000884	13972	Gnb1l	23.7000487596544	0.144237263596389	0.299637853089841	0.481371969893076	0.630252154642901	0.745978772206128
ENSMUSG00000000889	13166	Dbh	4.12405640493018	5.87014287280578	1.34772585225165	4.35559120795859	1.3270824292957e-05	6.72284038911645e-05
ENSMUSG00000000901	17385	Mmp11	76.8337326088006	1.3721158238321	0.281764135325599	4.86973199142796	1.11749713818002e-06	6.93029823160212e-06
ENSMUSG00000000902	20587	Smarcb1	321.259660350183	0.595345372780569	0.11892531559955	5.00604408556071	5.55600372381127e-07	3.63601539346785e-06
ENSMUSG00000000903	22364	Vpreb3	0.719121200145294	1.51076074822131	1.64568396140609	0.918013897960396	0.358611589851593	0.50134099746704
ENSMUSG00000000915	29816	Hip1r	158.4345319296	-0.143591066117451	0.220369644435762	-0.651591858239388	0.514664501408996	0.648856359050323
ENSMUSG00000000916	100609	Nsun5	117.21512274215	-0.0297559602446803	0.147227957290114	-0.202108083222576	0.839832228768657	0.899265435439285
ENSMUSG00000000934	72960	Top1mt	119.13199468475	-0.678372761521667	0.145925761808199	-4.64875257881677	3.33948507479631e-06	1.90584625924681e-05
ENSMUSG00000000938	15395	Hoxa10	235.383666785393	-0.500876903478638	0.138645960260935	-3.61263251043142	0.000303104124876217	0.00116146705196152
ENSMUSG00000000942	15401	Hoxa4	23.2672033450164	-0.128333971476715	0.322966138081454	-0.397360454687509	0.691101672651085	0.792996841313672
ENSMUSG00000000948	NA	Gm38393	6.28551839586349	-2.3449385966664	0.711171360695354	-3.29729053539729	0.000976224607932852	0.00331926030692629
ENSMUSG00000000957	17387	Mmp14	931.162548301933	2.24317695151589	0.191433458966763	11.7177893750818	1.03333306709911e-31	1.70359422774228e-29
ENSMUSG00000000958	20540	Slc7a7	56.8646664717538	1.6768976513645	0.268887552778879	6.23642721291569	4.47677467950489e-10	4.95474611145203e-09
ENSMUSG00000000959	69089	Oxa1l	706.059533854043	-0.246540752930609	0.100427872304813	-2.45490367636509	0.0140922343195092	0.035459434048406
ENSMUSG00000000976	217026	Heatr6	199.582276610142	-0.261087435776384	0.140825156830073	-1.85398292218076	0.0637416032873491	0.127718712741438
ENSMUSG00000000982	20302	Ccl3	7.39257379712027	4.94543474526109	1.05010097382412	4.70948496243312	2.48343534785057e-06	1.45187618861006e-05
ENSMUSG00000000983	14038	Wfdc18	0.954244691032544	2.27622236676776	2.22333881411625	1.02378564720579	0.305936531075926	0.444447660406751
ENSMUSG00000001014	78369	Icam4	0	NA	NA	NA	NA	NA
ENSMUSG00000001016	67781	Ilf2	355.868259264408	0.367291656133503	0.118729932623662	3.09350513402301	0.00197807130497793	0.00621593373787514
ENSMUSG00000001017	66511	Chtop	1572.68194223628	-0.270890182234583	0.0771083021692364	-3.51311304507829	0.000442889001409684	0.00163508716249566
ENSMUSG00000001018	20615	Snapin	906.566279631255	-0.466903352644025	0.0975954806737733	-4.78406735046181	1.7178308125216e-06	1.03210079838033e-05
ENSMUSG00000001020	20198	S100a4	4.65302926955875	2.60567926139307	0.84319382262784	3.09024946752147	0.0019998844354172	0.00627969197700405
ENSMUSG00000001021	20197	S100a3	0.87363784746585	1.53419097204006	1.72816258335677	0.887758470652715	0.374670686381665	0.517924168564083
ENSMUSG00000001023	20199	S100a5	0.505656921058343	-2.15419875102182	2.2943054668952	-0.938932841378365	0.347765226323172	NA
ENSMUSG00000001025	20200	S100a6	1259.1736160417	1.85445455438184	0.200281006558561	9.25926320347111	2.05847729310628e-20	9.57586908720862e-19
ENSMUSG00000001027	110880	Scn4a	4432.31494866847	-1.62731100509942	0.209864468620056	-7.75410442653608	8.89690952486256e-15	2.01038938035491e-13
ENSMUSG00000001029	15896	Icam2	110.777166790376	0.379135988412573	0.180073067260735	2.10545638045698	0.0352516004619685	0.0783163068603401
ENSMUSG00000001034	23939	Mapk7	129.952437659065	0.825662195733191	0.157197147693326	5.25239934597265	1.50130511630207e-07	1.09946324935156e-06
ENSMUSG00000001036	13855	Epn2	417.515356399736	-0.548740513510702	0.134657412801067	-4.07508582035041	4.59973806940842e-05	0.0002087916346572
ENSMUSG00000001039	27078	B9d1	28.4159858298159	0.615217718665146	0.267448260592363	2.30032424702452	0.0214298569764174	0.0510314874705349
ENSMUSG00000001052	99683	Sec24b	358.528773174425	-0.24836932466131	0.157894065606451	-1.57301240998105	0.115715944699413	0.208486989715466
ENSMUSG00000001053	212706	N4bp3	114.022764318814	0.767672846509739	0.148444741969989	5.17143845125169	2.3229878873524e-07	1.62996712232068e-06
ENSMUSG00000001054	66089	Rmnd5b	196.20414548108	0.0554070064610312	0.11371920388719	0.487226471581664	0.626097847875871	0.742725330936332
ENSMUSG00000001056	52530	Nhp2	366.032079912132	0.643690383149644	0.191520509064602	3.36094753660308	0.000776755781864518	0.00270137444653762
ENSMUSG00000001062	72325	Vps9d1	281.270716359808	-0.270083435417099	0.0984153356965844	-2.74432265566587	0.006063590732391	0.0169665278768654
ENSMUSG00000001065	57247	Zfp276	83.7398155068339	0.0170401487899294	0.184779124633066	0.0922190145871061	0.926524030962134	0.955646007510894
ENSMUSG00000001076	239659	C1ql4	0	NA	NA	NA	NA	NA
ENSMUSG00000001082	68294	Mfsd10	106.460540505131	1.69097584573012	0.208043027301016	8.12801018937041	4.36394543194095e-16	1.1679504865122e-14
ENSMUSG00000001089	269593	Luzp1	312.953729408674	0.0686809117112456	0.157192597819074	0.436922047629088	0.662167881866847	0.771742772848772
ENSMUSG00000001095	20500	Slc13a2	0.383029186547402	-0.152170684020316	2.32580425496693	-0.0654271242712471	0.94783392829713	NA
ENSMUSG00000001098	330171	Kctd10	189.008638886712	0.073159809786765	0.19887871051098	0.367861444791125	0.712976550060874	0.809444548710751
ENSMUSG00000001100	67811	Poldip2	1208.8187402489	-0.432628480011363	0.0883655295656278	-4.89589642180615	9.78586029636053e-07	6.1296963218054e-06
ENSMUSG00000001103	18292	Sebox	0.989200270856634	-0.873716577335827	1.66058486306915	-0.526149910653164	0.598784052961896	0.720400593346883
ENSMUSG00000001105	55978	Ift20	240.478580257813	0.360124100259046	0.134301673963013	2.68145652717796	0.00733024379778006	0.0200719723870119
ENSMUSG00000001119	12833	Col6a1	4086.13493011716	1.20917903590193	0.126716981940539	9.54235981148386	1.39618508105643e-21	7.37758516677201e-20
ENSMUSG00000001120	59093	Pcbp3	43.0230958529146	0.842366929083195	0.274672960939445	3.0667996085312	0.00216363854390091	0.00674149729554128
ENSMUSG00000001123	16859	Lgals9	333.878244404432	1.48193893790321	0.155389426790372	9.5369354821189	1.4711530994393e-21	7.73406200848091e-20
ENSMUSG00000001127	11836	Araf	1015.25943744729	-0.21722436182526	0.0950435642443031	-2.28552415465922	0.022282111747385	0.0527440568447174
ENSMUSG00000001128	18636	Cfp	335.017383554104	1.95077538285736	0.262703361967411	7.42577243110943	1.12123631028996e-13	2.1375058170634e-12
ENSMUSG00000001131	21857	Timp1	290.355158064121	4.88496829610869	0.45576493444602	10.7181749338535	8.36373658354886e-27	8.20761350065594e-25
ENSMUSG00000001134	22294	Uxt	59.6369833339592	-0.0256753161844825	0.180338476045669	-0.142372924222674	0.886785447845006	0.930019058991852
ENSMUSG00000001138	94218	Cnnm3	187.327472948681	-0.560117636297237	0.124523858290629	-4.49807485879506	6.85715547286389e-06	3.67331063126537e-05
ENSMUSG00000001143	214895	Lman2l	390.995386174561	-0.0773852847868828	0.101986887695086	-0.758776804899121	0.447986083175967	0.588856818605073
ENSMUSG00000001150	54387	Mcm3ap	328.381449285603	-0.245264293224193	0.142927031377726	-1.71601054650055	0.0861601121402679	0.164345389761814
ENSMUSG00000001151	18541	Pcnt	751.109073775722	-0.861709841120404	0.17635186427692	-4.88630979124375	1.02743491990017e-06	6.41034781389727e-06
ENSMUSG00000001155	14317	Ftcd	1.22025213328334	-0.376645300362075	1.18700120541643	-0.317308271165519	0.751009701926282	0.837625585175992
ENSMUSG00000001156	17119	Mxd1	99.541449374217	0.348705416304342	0.250322114190857	1.39302681040187	0.163611683457661	0.274636276997269
ENSMUSG00000001157	23885	Gmcl1	84.9551013209757	0.547900415885956	0.178094536855031	3.07645829884129	0.00209475601603237	0.00654567581173542
ENSMUSG00000001158	66618	Snrnp27	667.778802453468	0.0072890205463813	0.14431447080529	0.0505078978269316	0.9597176558835	0.97485515834223
ENSMUSG00000001166	114643	Oas1c	7.60739608448379	1.18654434448985	0.642527671735584	1.84668209119271	0.0647932287357249	0.12949848295857
ENSMUSG00000001168	246729	Oas1h	0.398771477681502	2.40767226202772	3.41598567541238	0.7048250463571	0.480919119701441	NA
ENSMUSG00000001173	320634	Ocrl	263.80134909598	-0.198586315113835	0.144708924953251	-1.37231559959407	0.169965211469933	0.282927550724749
ENSMUSG00000001175	12313	Calm1	7796.88381735573	-0.319777536546392	0.0789160807489966	-4.05212136121519	5.07553238359179e-05	0.000228127745607546
ENSMUSG00000001211	28169	Agpat3	1633.6503055771	-0.269188991855923	0.0821567214568798	-3.27653035664535	0.00105091014786298	0.00354686477680318
ENSMUSG00000001225	13487	Slc26a3	0.0362982788231126	0	4.32794324778021	0	1	NA
ENSMUSG00000001227	20359	Sema6b	146.010556188415	0.877284106378043	0.308914171485562	2.83989595608127	0.00451282501141729	0.0130252517976593
ENSMUSG00000001228	18140	Uhrf1	64.0770219340588	3.3644028121647	0.709855076263727	4.7395629399074	2.14179699865823e-06	1.26615469157627e-05
ENSMUSG00000001229	224897	Dpp9	718.615763211763	-1.03626429073015	0.144065398492327	-7.19301304528959	6.3376884454769e-13	1.08477644090023e-11
ENSMUSG00000001240	54409	Ramp2	321.995735736109	0.513849531734231	0.117342822177886	4.37904528114435	1.19200364815428e-05	6.09095243768002e-05
ENSMUSG00000001247	54135	Lsr	6.06133596789215	0.501516502690083	0.573670997634576	0.874223212883327	0.381996706968392	0.525775759932759
ENSMUSG00000001248	52857	Gramd1a	566.049426790463	-0.00294073783928131	0.100594963839973	-0.0292334499365142	0.976678403435683	0.985525561279075
ENSMUSG00000001249	15451	Hpn	83.3725719764553	-0.381476520291121	0.202724615828629	-1.88174740759454	0.0598703196204957	0.12117054968918
ENSMUSG00000001260	14405	Gabrg1	0.54545050767499	-2.51869698006608	1.96370035756346	-1.28262795816326	0.199622450320595	NA
ENSMUSG00000001270	12709	Ckb	602.365690356861	2.07142313528604	0.287757992246119	7.19849036726094	6.08828463489324e-13	1.04469083893322e-11
ENSMUSG00000001280	20683	Sp1	299.347577632968	0.346810177702816	0.100759576657457	3.44195747151495	0.000577521037912216	0.00207249497474232
ENSMUSG00000001281	16421	Itgb7	73.3910997806084	1.73979683767705	0.274808761389142	6.33093657160883	2.43677509012911e-10	2.82276903076901e-09
ENSMUSG00000001285	60315	Myg1	122.450530816099	0.358005074978138	0.170585933667233	2.09867875552101	0.0358452286490286	0.0793872619021152
ENSMUSG00000001288	19411	Rarg	285.592805959421	0.137804837471465	0.172025815974922	0.801070680528287	0.423090728671803	0.565658085926334
ENSMUSG00000001289	56612	Pfdn5	856.139206344024	0.349953603916748	0.137546497812621	2.54425673849935	0.0109510560437177	0.0284984673505409
ENSMUSG00000001300	13642	Efnb2	178.643375413675	-0.405722407768093	0.22577215157285	-1.79704363421978	0.0723286928998518	0.142001337442559
ENSMUSG00000001305	67223	Rrp15	134.799511977674	0.210892020598477	0.168724027822091	1.24992286706698	0.2113277252114	0.335885423058659
ENSMUSG00000001313	11858	Rnd2	44.193693180827	0.262338452210668	0.224038613569576	1.17095195346403	0.241618090303721	0.372811141432995
ENSMUSG00000001323	27364	Srr	95.4611609740373	-0.573505111004646	0.168307701717793	-3.40747990229385	0.000655657368136815	0.00231485130076469
ENSMUSG00000001333	68828	Sync	361.593105636047	-0.416201455846528	0.210149853030399	-1.98049843882747	0.0476475485947537	0.10056541186406
ENSMUSG00000001334	384061	Fndc5	1509.00676948455	-0.702124744148078	0.220592131838919	-3.18290928282422	0.00145803288090289	0.00474004442493245
ENSMUSG00000001348	11433	Acp5	156.717208122399	1.69056590302	0.542998781513095	3.11338802328276	0.00184952678693177	0.00585844574624807
ENSMUSG00000001349	12797	Cnn1	47.1373392998995	-1.09744243768145	0.3034276469939	-3.61681754630459	0.000298247374864696	0.00114498545104539
ENSMUSG00000001366	71538	Fbxo9	498.17957444293	-0.565288665163574	0.109614002992006	-5.15708440284586	2.50824758952829e-07	1.74216266683515e-06
ENSMUSG00000001376	73288	Vps50	321.130829533302	-0.346978290225069	0.099012936525908	-3.504373291002	0.000457683311707939	0.00168397387746424
ENSMUSG00000001380	15115	Hars	380.730184131285	0.431599207178795	0.126269777502482	3.41807212870326	0.000630663912730336	0.00223772760219469
ENSMUSG00000001383	66492	Zmat2	767.639176593065	0.159997510787197	0.116441117860176	1.37406367894307	0.169421914097755	0.282228340936588
ENSMUSG00000001403	68612	Ube2c	84.652822261557	2.36506304476032	0.42290545836453	5.59241551032836	2.23932131673159e-08	1.88358913041652e-07
ENSMUSG00000001415	229512	Smg5	824.594176174494	-0.387229899261279	0.105675701822116	-3.66432294826965	0.000247993717107533	0.000968660826791518
ENSMUSG00000001416	12462	Cct3	1269.05241392317	0.373914010099503	0.135965160028726	2.75007222453534	0.00595821304389683	0.0167079676702444
ENSMUSG00000001418	56700	Glmp	409.102924653353	0.840335649767918	0.122159629050518	6.87899641067513	6.02756789998725e-12	8.94928813277645e-11
ENSMUSG00000001419	17261	Mef2d	2443.03694943856	-0.688483658884032	0.139116924022673	-4.94895688443935	7.4612271207973e-07	4.77370284090006e-06
ENSMUSG00000001420	71913	Tmem79	23.2490460402439	-1.13046426475171	0.367664732542603	-3.07471499083942	0.00210703799239554	0.00657906650716475
ENSMUSG00000001424	56463	Snd1	814.684332145848	0.633196272504349	0.115014316586797	5.50536916877213	3.68395461978424e-08	2.99956289231583e-07
ENSMUSG00000001435	12822	Col18a1	550.638933064166	0.928831282441408	0.131115921488987	7.08404648263426	1.40004912830603e-12	2.29349860382596e-11
ENSMUSG00000001436	20509	Slc19a1	90.8919542759088	0.52584136412664	0.184787048772775	2.84566135786521	0.00443192990502366	0.0128061149022333
ENSMUSG00000001440	16211	Kpnb1	1161.010206973	0.181567742223409	0.169607950545862	1.07051433402182	0.284387860451911	0.421812654972865
ENSMUSG00000001441	19155	Npepps	1414.39946370033	-0.169174823718256	0.0846722138322317	-1.99799693502117	0.0457169924114072	0.0971073778204782
ENSMUSG00000001444	57765	Tbx21	11.1065053882421	0.373589517640792	0.407872703195215	0.915946359523809	0.359695029759485	0.502548825307354
ENSMUSG00000001445	107732	Mrpl10	324.955450024313	-0.254842964609146	0.100765741711698	-2.5290635515618	0.0114367316623285	0.0296351271340708
ENSMUSG00000001467	13121	Cyp51	147.8554078214	0.365557989278126	0.302176085502727	1.20975155485899	0.2263742406643	0.354519367095515
ENSMUSG00000001472	66855	Tcf25	2439.68174211818	-0.242661373032362	0.0828665266339257	-2.92834010171986	0.0034077706187444	0.0101177549216373
ENSMUSG00000001473	67951	Tubb6	1191.58480456148	2.46573715435778	0.256138302083046	9.62658506871155	6.17474727400652e-22	3.42067719953566e-20
ENSMUSG00000001482	23854	Def8	519.213211117385	-0.575433505905535	0.125668117954992	-4.57899358460691	4.6721852665626e-06	2.58065917912951e-05
ENSMUSG00000001493	17285	Meox1	142.151004483661	1.76558201035384	0.230643355288616	7.65503089453617	1.93265774634117e-14	4.11873948672169e-13
ENSMUSG00000001494	74499	Sost	0	NA	NA	NA	NA	NA
ENSMUSG00000001496	21869	Nkx2-1	0	NA	NA	NA	NA	NA
ENSMUSG00000001497	18511	Pax9	4.68485873865514	-0.497479437177588	0.691273848692548	-0.719656093049815	0.47173676614802	0.610726930316522
ENSMUSG00000001504	16372	Irx2	1.5429866678905	1.34086618899437	1.2482457992923	1.07420044173558	0.282732854459199	0.420235028106396
ENSMUSG00000001506	12842	Col1a1	16044.7091031422	0.840162113539228	0.191650015597317	4.38383535175142	1.16607918522138e-05	5.9726372765682e-05
ENSMUSG00000001507	16400	Itga3	131.488111539792	-0.178659200945238	0.296113024193981	-0.603348000080537	0.54627720725742	0.676583970620885
ENSMUSG00000001508	20391	Sgca	643.847517192031	-5.35522661537108	0.176994387597296	-30.2564769881601	4.28796734456301e-201	8.83664310367546e-197
ENSMUSG00000001510	13393	Dlx3	0.167772542577505	1.34767052137196	4.29289266718327	0.313930635087649	0.753573722285209	NA
ENSMUSG00000001517	14235	Foxm1	29.4174424014623	3.33979143474971	0.592509339407701	5.63668994329831	1.73349815176311e-08	1.48911754529113e-07
ENSMUSG00000001518	101142	Itfg2	149.73914702531	-0.42159621052874	0.13289763887433	-3.17233785415412	0.00151216975087381	0.00489750027125686
ENSMUSG00000001520	60345	Nrip2	31.18603081948	-0.00187322465519499	0.288478626335736	-0.00649346081194558	0.994819004281472	0.996978928488206
ENSMUSG00000001521	22158	Tulp3	168.117671519621	0.394160280397372	0.120371245466626	3.27453852346037	0.00105834707700438	0.00356962627870806
ENSMUSG00000001524	14885	Gtf2h4	159.268909480544	-0.374556221980687	0.134211391865637	-2.79079306736991	0.0052579075960389	0.0149537620396315
ENSMUSG00000001525	22154	Tubb5	1682.13383121198	2.20010637448037	0.268571923187213	8.19187035029995	2.57197610027455e-16	7.13368552819085e-15
ENSMUSG00000001542	192657	Ell2	357.304891721181	-0.808332703994676	0.429633544648008	-1.88144690763597	0.0599111510592025	0.121222287778895
ENSMUSG00000001552	16480	Jup	1550.16643023151	-0.475943812007837	0.141283300389923	-3.36871952095042	0.000755182338500757	0.00263329909167912
ENSMUSG00000001555	14230	Fkbp10	236.292669331096	1.83179027643228	0.191161238453055	9.58243570326169	9.47828203374894e-22	5.12673060765087e-20
ENSMUSG00000001558	66720	Klhl10	2.99898150317331	0.750173598267352	0.842356801440965	0.890565134612885	0.373162510646166	0.51635889474224
ENSMUSG00000001566	15285	Mnx1	0	NA	NA	NA	NA	NA
ENSMUSG00000001569	433864	Nom1	226.039134310358	-0.308566304875562	0.113049156442239	-2.72948790231106	0.00634327764717902	0.0176591388113783
ENSMUSG00000001576	67458	Ergic1	593.279281659748	0.0663333634411287	0.116931565396707	0.567283634800266	0.5705214938237	0.697018434000404
ENSMUSG00000001583	83813	Tnk1	1.27290955095307	1.12345163548842	1.10258158312641	1.01892835204343	0.308236982468865	0.446925190650698
ENSMUSG00000001588	216859	Acap1	19.9950775597398	1.48203739454891	0.447579001806683	3.31123084096118	0.000928865497353467	0.00317236661741138
ENSMUSG00000001604	21401	Tcea3	2016.82335671812	-1.09197766632475	0.149627604016496	-7.29796933862794	2.92143187742818e-13	5.26275569613584e-12
ENSMUSG00000001622	12994	Csn3	0	NA	NA	NA	NA	NA
ENSMUSG00000001627	15982	Ifrd1	534.689033680131	-0.661955550342274	0.184562099670637	-3.58662776119028	0.000334981975802229	0.00127109345559424
ENSMUSG00000001630	232533	Stk38l	170.413883851556	-0.708889613179248	0.136790625291621	-5.18229675219324	2.1917014070694e-07	1.5489225856271e-06
ENSMUSG00000001632	78783	Brpf1	216.880863245472	-0.123573501359968	0.135926599763908	-0.909119345106871	0.36328713220104	0.506468760681846
ENSMUSG00000001642	11677	Akr1b3	1825.52072131376	-0.26560216114922	0.124223720868505	-2.13809535966458	0.0325090044828932	0.0729629235878309
ENSMUSG00000001655	15422	Hoxc13	0.092313825770329	0	4.32794324777618	0	1	NA
ENSMUSG00000001656	109663	Hoxc11	85.1561023965686	-0.454512866985839	0.183067531925539	-2.48276066326555	0.0130368647064565	0.0331560789671301
ENSMUSG00000001657	15426	Hoxc8	79.521624201969	-0.000457212360417095	0.218840817036834	-0.00208924626862519	0.99833302387126	0.999157251029039
ENSMUSG00000001661	15425	Hoxc6	156.454867075702	-0.214554606746805	0.205374115523156	-1.04470130620046	0.296161040954246	0.434119548473227
ENSMUSG00000001663	14871	Gstt1	89.5974665490188	0.380842050103336	0.169456092618884	2.24743793048428	0.0246120531994972	0.057467164325316
ENSMUSG00000001665	103140	Gstt3	33.7043672376948	0.707463683257708	0.253905406555193	2.78632776220117	0.00533089395215897	0.0151300182572775
ENSMUSG00000001666	13202	Ddt	30.1300635008481	0.209262777077338	0.328382988944432	0.637252184560475	0.523960591074758	0.656759312746708
ENSMUSG00000001670	234724	Tat	0.747171809525318	-2.09687754972011	2.23468132787112	-0.938334036073819	0.348072773590574	0.490031679065074
ENSMUSG00000001672	73608	Marveld3	0.579779609175821	0.596858602582643	1.92399372491824	0.310218580680666	0.756394741717844	NA
ENSMUSG00000001674	66942	Ddx18	282.726373133564	0.269277789197575	0.159013306517675	1.69342928019451	0.0903737854583818	0.170848818523652
ENSMUSG00000001687	24109	Ubl3	1324.84727889711	-0.672019355064947	0.095205104460118	-7.05864836634321	1.6812992248537e-12	2.71964006481829e-11
ENSMUSG00000001700	107022	Gramd3	225.073432634957	-0.489572685378095	0.132788429288272	-3.6868625376634	0.000227035914788229	0.000893403882366971
ENSMUSG00000001707	66143	Eef1e1	192.907430545151	0.176492323217422	0.151561410046355	1.16449380593281	0.244223952073141	0.375649296018861
ENSMUSG00000001729	11651	Akt1	1176.44248874872	0.408026051926084	0.102862360741186	3.9667187199089	7.28689049233707e-05	0.000318153049292547
ENSMUSG00000001739	60363	Cldn15	55.8560390617201	0.454577403943935	0.21904342779807	2.07528437859819	0.0379601863715795	0.0831774078410963
ENSMUSG00000001741	16170	Il16	71.685941143975	1.08190565924589	0.306718325639122	3.52735904185535	0.000419727179975653	0.00155879216524387
ENSMUSG00000001750	27060	Tcirg1	467.442245388674	2.62224770974494	0.21590463434219	12.1453979796881	6.06865799214667e-34	1.2382465732887e-31
ENSMUSG00000001751	27419	Naglu	174.364468249577	1.39792783462387	0.194157997763107	7.19994978692297	6.02347376251721e-13	1.03529397246e-11
ENSMUSG00000001755	71743	Coasy	159.699090463153	0.099884469554956	0.131350758627844	0.760440751149056	0.446991172291429	0.588074187856344
ENSMUSG00000001761	319757	Smo	175.891392831155	0.686068271862782	0.150740768805898	4.55131201265268	5.33124188821196e-06	2.91577051041062e-05
ENSMUSG00000001763	232670	Tspan33	36.6589191046672	0.389182747933181	0.231371440305675	1.68206908950826	0.0925554434416353	0.173928336335308
ENSMUSG00000001767	66877	Crnkl1	245.229745442704	-0.0843474747940862	0.103852305565946	-0.812186829502072	0.416684435675223	0.559707525120258
ENSMUSG00000001768	74030	Rin2	365.702214911865	1.16674533230579	0.187990731623819	6.20639816775924	5.42127212111197e-10	5.90806852839108e-09
ENSMUSG00000001768	408057	Rin2	365.702214911865	1.16674533230579	0.187990731623819	6.20639816775924	5.42127212111197e-10	5.90806852839108e-09
ENSMUSG00000001773	53320	Folh1	0.93298487579555	-1.15998988161954	1.44519781156032	-0.802651285755236	0.422176316704722	0.564704979483065
ENSMUSG00000001774	66917	Chordc1	712.867344874688	-0.39159003653447	0.104099941922185	-3.7616739193494	0.000168779997831615	0.000680003557246122
ENSMUSG00000001783	28088	Rtcb	539.372531552635	0.379305999031979	0.109740589107381	3.45638748722982	0.000547467706104831	0.00197690809311519
ENSMUSG00000001785	103136	Pwp1	278.864392371956	-0.321119800109373	0.114393332481332	-2.80715486771729	0.0049981206407892	0.0142819287528264
ENSMUSG00000001786	69754	Fbxo7	97.1062788715259	0.00211475895092196	0.15474697880144	0.0136659143028276	0.989096517353582	0.993967963603775
ENSMUSG00000001794	12336	Capns1	2599.5892640316	0.464852605301288	0.0910685610979246	5.10442461917718	3.31802499490048e-07	2.26117258911736e-06
ENSMUSG00000001802	435965	Lrp3	158.404973452139	-0.464227602140675	0.133545969954368	-3.47616331888788	0.000508642433429321	0.00185163456423096
ENSMUSG00000001804	16769	Dsg4	0	NA	NA	NA	NA	NA
ENSMUSG00000001815	14029	Evx2	1.63587951771351	1.73771351638308	1.36664694222175	1.27151604609606	0.203545122641321	0.325950570160257
ENSMUSG00000001819	15433	Hoxd13	1.32465530317658	0.592642523907126	1.82953913003272	0.323929952728874	0.745991066591794	0.834331048535965
ENSMUSG00000001823	15432	Hoxd12	0	NA	NA	NA	NA	NA
ENSMUSG00000001827	14275	Folr1	4.36515454502303	2.12656695747443	0.967249268620463	2.1985717916411	0.0279083845721267	0.0639182028520102
ENSMUSG00000001829	20480	Clpb	780.720904599454	-0.906542237247654	0.099636925757758	-9.0984565245588	9.16246262101245e-20	3.87720800192658e-18
ENSMUSG00000001833	235072	Septin7	1275.3615972165	-0.0582491326272767	0.0862823923400683	-0.675098719999523	0.499613046824674	0.635918146014707
ENSMUSG00000001844	72881	Zdhhc4	260.986509121093	-0.0551082458601325	0.106099238911001	-0.519402838566627	0.603479852274743	0.724442989204747
ENSMUSG00000001847	19353	Rac1	2113.40661858972	-0.316950791183606	0.121350113865004	-2.61187057093491	0.00900483379875585	0.0240627094041443
ENSMUSG00000001855	227720	Nup214	172.403973877888	-0.241798049152127	0.161762119210656	-1.49477547853613	0.134973048036984	0.235664803432627
ENSMUSG00000001864	108897	Aif1l	206.802269066287	2.99125145264797	0.352070760300324	8.49616551541051	1.9595651939063e-17	6.35948338834977e-16
ENSMUSG00000001865	12873	Cpa3	56.3399407996103	0.396769558942647	0.18874568973582	2.10213838259295	0.0355411554830865	0.0788069864638957
ENSMUSG00000001870	268977	Ltbp1	314.115173975486	0.0791314134384478	0.135119413963776	0.58564059091954	0.55811706500739	0.686626259666425
ENSMUSG00000001891	216558	Ugp2	5874.42625149506	-0.846396636922789	0.151387442090899	-5.5909302993215	2.25856236812911e-08	1.89667698787305e-07
ENSMUSG00000001901	192775	Kcnh6	0	NA	NA	NA	NA	NA
ENSMUSG00000001909	212528	Trmt1	485.613118613773	-0.296604352323123	0.116008246216406	-2.55675231715706	0.0105654416300554	0.0276345502109637
ENSMUSG00000001910	66830	Nacc1	527.285373132408	-0.0306847560991773	0.135051240858951	-0.227208250024336	0.820261812855301	0.885765847795118
ENSMUSG00000001911	18032	Nfix	4272.27942257137	-0.464629798427016	0.101935861650488	-4.5580602440004	5.16282300064301e-06	2.83267988278092e-05
ENSMUSG00000001918	20514	Slc1a5	611.25359331429	-0.0623770605083279	0.161134079520051	-0.38711277399618	0.698672721188561	0.798571682654125
ENSMUSG00000001924	22201	Uba1	2565.48359911029	-0.0593675448026862	0.0738701753898965	-0.803674073999913	0.421585230873837	0.564157690769353
ENSMUSG00000001930	22371	Vwf	484.750668725807	-0.570263430795392	0.163472311002097	-3.48844050285725	0.000485846934939984	0.00177712702080994
ENSMUSG00000001942	22619	Siae	131.381053329917	0.0324677567312215	0.134997661960475	0.240506066991941	0.809937960496124	0.877791295814048
ENSMUSG00000001943	57276	Vsig2	61.2148042364244	-0.530890036153172	0.320833632294041	-1.65472064869626	0.0979811765494056	0.182402537157195
ENSMUSG00000001946	69524	Esam	499.661440027062	0.192019146226268	0.140055782004004	1.37101905739799	0.170369015315657	0.283382927826608
ENSMUSG00000001948	20686	Spa17	23.3440187600883	-0.254438446846106	0.342114013100796	-0.743724130268646	0.457043387989443	0.597171156212615
ENSMUSG00000001962	108160	Fam50a	245.095921070829	-0.0235221701153925	0.134954182229342	-0.174297452119111	0.861631701511945	0.914504246139215
ENSMUSG00000001964	13726	Emd	344.397391645708	-0.24062002342558	0.189435497653159	-1.27019500783394	0.204015175463259	0.32650032895448
ENSMUSG00000001983	70207	Taco1	405.248160598939	-0.723806122860223	0.144952538660504	-4.99340080242032	5.93252628339666e-07	3.86279626060785e-06
ENSMUSG00000001985	14807	Grik3	2.2806594193222	-1.72763438301792	0.92894319667278	-1.85978474163526	0.0629159869816966	0.126494893631103
ENSMUSG00000001986	53623	Gria3	37.7039062748923	0.607756089043785	0.245003225836046	2.48060443681868	0.0131159835020486	0.0333161824245307
ENSMUSG00000001988	18142	Npas1	5.36967179637158	-0.984717462135649	0.71245013289785	-1.38215633160228	0.166923705088993	0.279081917448805
ENSMUSG00000001995	244668	Sipa1l2	180.069875656384	0.0648610097792314	0.143863393044937	0.450851383429913	0.652096664869406	0.76376289114116
ENSMUSG00000001998	108011	Ap4e1	104.556021138723	-0.734690512332297	0.217071779507029	-3.38455101810462	0.000712947682184042	0.00250083843990617
ENSMUSG00000001999	109778	Blvra	175.562932785729	0.853590083282483	0.166637533255349	5.12243590388772	3.01613637163635e-07	2.0698147967593e-06
ENSMUSG00000002006	245469	Pdzd4	37.5134204968943	0.749973211968928	0.232134951886141	3.23076385471146	0.0012345989441552	0.00409308478782985
ENSMUSG00000002007	56504	Srpk3	563.309012750227	0.347009094465725	0.181072932371503	1.91640511876052	0.0553135497833658	0.113649215746321
ENSMUSG00000002010	15929	Idh3g	3482.50713159145	-0.576795174759635	0.099872468796486	-5.77531707897392	7.68083033739577e-09	6.95459365523075e-08
ENSMUSG00000002012	93843	Pnck	133.775645967425	0.222239643398993	0.24883993304858	0.893102809811506	0.371802118418005	0.515099028998873
ENSMUSG00000002014	20832	Ssr4	614.322099819585	0.148520483583795	0.0938469707917146	1.58258154025475	0.113516873688205	0.205567287606901
ENSMUSG00000002015	27061	Bcap31	725.843938518877	0.595477032846078	0.123870546993439	4.80725279171988	1.53018453932061e-06	9.23398037666737e-06
ENSMUSG00000002017	72722	Fam98a	560.857674019357	-0.389610102982154	0.105451227539258	-3.69469480890686	0.000220151052588086	0.000869299270307583
ENSMUSG00000002020	16997	Ltbp2	110.043552104791	2.71896935334742	0.561463172094851	4.84264950665026	1.28119167866946e-06	7.85330104521723e-06
ENSMUSG00000002028	214162	Kmt2a	387.28478982014	-0.087885437811525	0.137181948985691	-0.640648703866222	0.521750948654874	0.655249758651171
ENSMUSG00000002031	76568	Ift46	167.681258043168	0.296981204346809	0.157210398914115	1.88906844838586	0.0588826575486395	0.119528546765402
ENSMUSG00000002032	71687	Tmem25	148.291646698147	-0.0134620875348137	0.194387043680257	-0.0692540371001123	0.944787410930359	0.965558188604339
ENSMUSG00000002033	12502	Cd3g	3.33825961669561	2.13963423770862	1.30454626693281	1.64013672181917	0.100976742634966	0.187016151003988
ENSMUSG00000002043	67091	Trappc6a	54.2507268566541	1.24832022234246	0.282068839433372	4.42558711855632	9.61803303665315e-06	5.00905799391833e-05
ENSMUSG00000002052	20926	Supt6	768.660216471939	-0.450041496416006	0.143852728478568	-3.12848773308498	0.00175708345192237	0.00559919217213797
ENSMUSG00000002055	54141	Spag5	63.6514852239179	0.632419792873559	0.342601503529966	1.84593408481129	0.0649017768402983	0.12969027607145
ENSMUSG00000002057	15218	Foxn1	0.18311009680528	0.569142729225198	4.16924625137116	0.136509741787984	0.891418323809646	NA
ENSMUSG00000002058	22248	Unc119	104.013186070585	0.47811124411433	0.194184241612369	2.46215264505725	0.0138105875144273	0.0348742295671263
ENSMUSG00000002059	19376	Rab34	129.206759169199	1.12724626426296	0.204620065070453	5.508972269532	3.60934754133079e-08	2.94463318019576e-07
ENSMUSG00000002064	20316	Sdf2	449.82502147027	0.30354675422372	0.13652701814367	2.22334566704074	0.0261925003786338	0.0605368489654524
ENSMUSG00000002068	12447	Ccne1	23.6298204745338	3.94157272096229	0.752864125944712	5.23543702659003	NA	NA
ENSMUSG00000002076	74377	Hsf2bp	7.16127004616763	1.95404550093137	0.622092289583555	3.14108619195306	0.00168322487478009	0.00538548334411864
ENSMUSG00000002083	170770	Bbc3	55.0183223439872	1.27153229088134	0.285238830701623	4.45778117850805	8.28123733447185e-06	4.36693293215957e-05
ENSMUSG00000002100	17868	Mybpc3	1.77654514913891	3.87008773501022	1.30588271660691	2.96357987267486	0.00304083134494902	0.0091402351745492
ENSMUSG00000002102	19182	Psmc3	2636.1469674919	0.121608943275881	0.0904562932429218	1.34439450165505	0.178820850879174	0.294881979268465
ENSMUSG00000002103	11432	Acp2	352.818043378163	0.717121215838389	0.10536685446536	6.80594689361393	1.00386741425823e-11	1.43764417463751e-10
ENSMUSG00000002104	19400	Rapsn	363.235985743528	0.0840425489679324	0.119872648888753	0.701098622137962	0.483241470165665	0.620901566006237
ENSMUSG00000002105	68427	Slc39a13	371.21974930874	0.140163966317244	0.0919446703532954	1.52443818416736	0.127399287652566	0.225321362851362
ENSMUSG00000002107	14007	Celf2	1076.66253657331	0.298179959859369	0.122330925664251	2.4374863366746	0.0147897731341425	0.0369484355374479
ENSMUSG00000002108	22259	Nr1h3	219.354468185205	-0.0520752722963031	0.116881279839612	-0.445539887719934	0.655929640841436	0.767031608605817
ENSMUSG00000002109	107986	Ddb2	31.0456552549703	-0.320114147059266	0.272875239103504	-1.17311540655341	0.240749529039574	0.372000172036255
ENSMUSG00000002111	20375	Spi1	253.363374354508	3.68478174571236	0.229117027674036	16.0825311986618	3.38270577299569e-58	7.74564450776613e-55
ENSMUSG00000002129	67465	Sf3a1	337.476094945237	0.24971759555855	0.135034282644148	1.8492903481157	0.0644158987004881	0.128856808427457
ENSMUSG00000002147	20852	Stat6	561.456913893905	0.366576725706417	0.105909995208198	3.46120991683363	0.000537753317115639	0.00194626279577083
ENSMUSG00000002190	12745	Clgn	0.40239630922522	-0.207150094403338	2.59612749169885	-0.079791957469617	0.93640272093919	NA
ENSMUSG00000002204	16541	Napsa	27.8886309840098	3.21250089971137	0.396960618542233	8.09274459393152	5.83351021766168e-16	1.5178911435047e-14
ENSMUSG00000002205	101568	Vrk3	223.149997277747	-0.257496033010775	0.134306413841655	-1.91722811774543	0.0552089574016851	0.113479572524828
ENSMUSG00000002210	71997	Smg9	223.976046226586	0.277806920431475	0.140411198833372	1.97852395492436	0.0478696289241304	0.10094109412345
ENSMUSG00000002221	55982	Paxip1	152.568429659188	-0.0529499810970164	0.140661113260428	-0.376436527976156	0.706592394241171	0.804763254164988
ENSMUSG00000002222	68477	Rmnd5a	1893.93937902673	-1.31670782682667	0.140443267706039	-9.3753716239547	6.89325041379361e-21	3.35830034343874e-19
ENSMUSG00000002227	17454	Mov10	82.3373224433338	1.69645139319455	0.243426763371276	6.96904222732119	3.19105918506676e-12	4.97062340785002e-11
ENSMUSG00000002228	71887	Ppm1j	503.517231470906	-0.469647328321057	0.144738643417378	-3.24479570370678	0.00117534914156707	0.00391808397111198
ENSMUSG00000002233	11853	Rhoc	788.630403698849	1.54529785441421	0.116225196000092	13.2957216472492	2.45097030216174e-40	9.01957071195521e-38
ENSMUSG00000002240	73779	Prr27	0	NA	NA	NA	NA	NA
ENSMUSG00000002249	21678	Tead3	169.216224821087	0.521583491586481	0.171768801924908	3.0365438062175	0.00239307332917775	0.00738601994424069
ENSMUSG00000002250	19015	Ppard	453.160319926903	-0.815630107201557	0.181028685722329	-4.50552962889324	6.62075998350333e-06	3.55870166249444e-05
ENSMUSG00000002250	69050	Ppard	453.160319926903	-0.815630107201557	0.181028685722329	-4.50552962889324	6.62075998350333e-06	3.55870166249444e-05
ENSMUSG00000002257	23853	Def6	47.3784124920275	2.29761962968599	0.24401582690439	9.41586313819818	4.69211228048872e-21	2.32440023741133e-19
ENSMUSG00000002265	18616	Peg3	842.382677953675	2.08391258426795	0.207863111245822	10.0254084131527	1.17871268054827e-23	8.23420709177582e-22
ENSMUSG00000002266	22776	Zim1	163.307885599801	1.40303104595065	0.259361849507003	5.4095505897168	6.31831011784476e-08	4.92651286070923e-07
ENSMUSG00000002274	70083	Metrn	19.1711940951204	-0.666668685576528	0.320350501342226	-2.08106022242286	0.0374283941528446	0.0821694201237692
ENSMUSG00000002279	76483	Lmf1	191.532361621227	0.0152344144296619	0.134262933109061	0.113467016375153	0.909660311289034	0.944677699129297
ENSMUSG00000002280	67563	Ciao3	417.354099116183	-0.433302869830686	0.121977415866364	-3.55232045828387	0.000381849508064972	0.00142893674635971
ENSMUSG00000002289	57875	Angptl4	343.516700820684	1.25816428520106	0.345704555582136	3.63942061186443	0.000273252161383711	0.00105829365566539
ENSMUSG00000002297	27214	Dbf4	29.266348864332	2.72684117426096	0.497510036885305	5.48097721069616	4.22982970388509e-08	3.39705107317474e-07
ENSMUSG00000002307	13163	Daxx	221.08932942547	0.0799348058643246	0.115401768384209	0.692665346324644	0.48851959114714	0.626004957987829
ENSMUSG00000002308	54219	Cd320	169.374720888746	0.0420478605576726	0.148966713213676	0.282263464438259	0.777741498142458	0.855129744102854
ENSMUSG00000002319	75751	Ipo4	314.669457437948	0.0829897320817974	0.13017486788944	0.637524995625748	0.523782933843784	0.656759312746708
ENSMUSG00000002320	74140	Tm9sf1	260.735658532998	0.392427748703114	0.109583229849431	3.58109310377433	0.00034215968955698	0.00129570505005333
ENSMUSG00000002324	56739	Rec8	9.97529717557244	4.16598918247226	0.877371759109203	4.7482599470742	2.0517422279424e-06	1.21465969070488e-05
ENSMUSG00000002325	16391	Irf9	221.865369044843	0.89778066686548	0.160041553707453	5.60967227615505	2.02710117175387e-08	1.71911526532937e-07
ENSMUSG00000002326	105446	Gmpr2	16.9084215407836	1.01217801260872	0.410706934948422	2.46447753003205	0.0137213166630686	0.0346700458303725
ENSMUSG00000002329	67881	Mdp1	287.797106590182	0.316920563120103	0.125445776626995	2.52635498493062	0.0115252958946711	0.0298383539946459
ENSMUSG00000002332	52585	Dhrs1	437.764065976178	0.298376759160675	0.125516108037487	2.37719894144233	0.0174446767600866	0.0426756764805158
ENSMUSG00000002341	13004	Ncan	1.7631064929002	-1.50036354022262	1.55046345529141	-0.967687135805873	0.333200644699891	0.474179883017426
ENSMUSG00000002342	234371	Tmem161a	763.169748644689	-0.287794802708837	0.0986134937145885	-2.91841199280278	0.00351819171218998	0.0104185795092414
ENSMUSG00000002343	76813	Armc6	134.209203896059	0.16668337496115	0.148401638726344	1.12319093233544	0.261356412852754	0.395653636675939
ENSMUSG00000002345	72368	Borcs8	85.9118363034991	0.311001354364337	0.182939177000732	1.70002598384431	0.0891260381118647	0.168939421763181
ENSMUSG00000002346	73095	Slc25a42	435.421868103852	-1.01463593412941	0.146607215424598	-6.92077761105316	4.49171153775351e-12	6.80126314254403e-11
ENSMUSG00000002365	66616	Snx9	524.080725317959	-0.0365328054228519	0.11188647537914	-0.326516724197956	0.744033437979198	0.832910048882357
ENSMUSG00000002372	71810	Ranbp3	659.735117720658	-0.135274074853719	0.0992996964526604	-1.36228084965203	0.173109268901099	0.287002076710688
ENSMUSG00000002379	69875	Ndufa11	495.737367487425	-0.324989453067126	0.149787364496352	-2.16967201579304	0.0300317014702092	0.0681150455533867
ENSMUSG00000002384	12164	Bmp8b	0.387997887933151	0	2.98021919289128	0	1	NA
ENSMUSG00000002393	13864	Nr2f6	187.084403953686	-0.134776621120237	0.148895054559852	-0.905178627447702	0.365370762575887	0.508410579011741
ENSMUSG00000002395	67023	Use1	708.124709791972	0.309003968295371	0.132902303086305	2.32504600085605	0.0200695005908513	0.0481926664574386
ENSMUSG00000002396	77090	Ocel1	95.7354402619246	0.311790765073362	0.167291976883917	1.8637520512398	0.0623565320652589	0.125480266849024
ENSMUSG00000002409	13549	Dyrk1b	653.480491605184	-0.403735019078069	0.161417577139832	-2.50118373867254	0.0123778941496481	0.0317307678362916
ENSMUSG00000002413	109880	Braf	128.063983675475	0.0917938511426774	0.186996897273203	0.490884354132178	0.623508243621091	0.74075889807452
ENSMUSG00000002416	68198	Ndufb2	42.4416580319651	-0.265703025408753	0.26988814029152	-0.98449315009453	0.324873097796826	0.465654786205632
ENSMUSG00000002428	20585	Hltf	121.524317349757	0.312600836307624	0.14006952427877	2.23175482259423	0.0256311717008134	0.0594627025115797
ENSMUSG00000002455	68879	Prpf6	589.33185543291	-0.0408327195979016	0.0734886671316849	-0.555632877716141	0.578461850941834	0.70418120636275
ENSMUSG00000002458	56470	Rgs19	93.6378537330065	1.72949369243499	0.212299060098539	8.14649717069988	3.74617515027194e-16	1.01983061422462e-14
ENSMUSG00000002459	58175	Rgs20	1.37778878710579	0.490121193311403	1.254692821773	0.390630427468945	0.696070431286234	0.796676625395281
ENSMUSG00000002475	106861	Abhd3	13.1639792653847	0.518992131929556	0.439585865717571	1.18063880666946	0.237746240487682	0.368547805323465
ENSMUSG00000002477	20641	Snrpd1	170.300301845704	0.84992553545883	0.23005148321004	3.69450143767531	0.000220318647213679	0.000869794383482661
ENSMUSG00000002486	77832	Tchp	67.3657136099352	0.298119754321771	0.198295995263554	1.50340784202697	0.132733905595818	0.232719102137028
ENSMUSG00000002489	21844	Tiam1	144.570435264278	-2.29508086802306	0.239674461521871	-9.57582569894968	1.01046623545818e-21	5.4369943029562e-20
ENSMUSG00000002496	22084	Tsc2	1048.94970615685	-0.958860991282537	0.107042601679798	-8.95775117789859	3.31367230395235e-19	1.3259836667932e-17
ENSMUSG00000002500	66211	Rpl3l	5962.24935923077	-0.884574825219293	0.144939850951876	-6.10304770848009	1.04064762735496e-09	1.07875585032852e-08
ENSMUSG00000002504	65962	Nherf2	694.747080254872	-0.55538408089708	0.210223005819572	-2.64188060070719	0.00824471152918111	0.022282887238474
ENSMUSG00000002524	67959	Puf60	904.888189493702	0.203221007473029	0.1073418179217	1.89321376708253	0.0583294473147954	0.118662709798944
ENSMUSG00000002546	99412	Golga2	886.666980917633	-0.412556416214145	0.115932032727759	-3.55860590474545	0.000372828457957203	0.00139797104468378
ENSMUSG00000002550	22245	Uck1	182.630677816952	-0.336947916647661	0.174028667733619	-1.93616328295645	0.0528477058684091	0.109510861994588
ENSMUSG00000002565	20259	Scin	23.7206814824333	-0.00950298313585806	0.33064507288393	-0.0287407371686255	0.977071366213634	0.98572902114508
ENSMUSG00000002578	22781	Ikzf4	22.4558985534689	-0.4849090952007	0.538364967961978	-0.900707000004774	0.367744125855769	0.510587913927786
ENSMUSG00000002580	103742	Mien1	46.4342405562912	0.208628340207912	0.23494219899262	0.887998584768784	0.374541512579545	0.517815073878926
ENSMUSG00000002588	18979	Pon1	19.8424075684523	-1.95188223668984	0.565470004770028	-3.45178739849103	0.000556886331245315	0.00200599781756746
ENSMUSG00000002602	26362	Axl	1273.13962855325	0.876038246946037	0.108005481984097	8.11105353962524	5.0182736385644e-16	1.32585363004532e-14
ENSMUSG00000002603	21803	Tgfb1	464.390600533844	2.08845737913254	0.170761611314049	12.2302510679151	2.14275316605761e-34	4.64819549959108e-32
ENSMUSG00000002608	52132	Ccdc97	646.703535569909	-0.207736466421491	0.0994725190987038	-2.08838047235298	0.0367635275623935	0.0810985630492191
ENSMUSG00000002617	22700	Zfp40	26.5749003397562	0.504456349743369	0.298682477358376	1.68893854840401	0.0912312069707752	0.172106619668046
ENSMUSG00000002625	54194	Akap8l	406.690111779653	-0.162235545946239	0.114252923381451	-1.41996844496128	0.15561686782243	0.264222672210291
ENSMUSG00000002633	20423	Shh	0	NA	NA	NA	NA	NA
ENSMUSG00000002635	68079	Pdcd2l	165.733630123441	-0.381820278934967	0.127221061699873	-3.00123480996975	0.00268887133227534	0.0082080077641135
ENSMUSG00000002658	98053	Gtf2f1	362.717988429937	0.291985797512634	0.1339371860053	2.18002039777869	0.0292559495835133	0.0665386391145616
ENSMUSG00000002660	53895	Clpp	415.357721886543	-0.307756675424679	0.140337287450151	-2.19297865176421	0.0283089172356772	0.0647060965386907
ENSMUSG00000002661	66400	Alkbh7	279.640730401529	-0.14693026454024	0.182538443398611	-0.804927782907553	0.420861354809663	0.563445124401841
ENSMUSG00000002664	19197	Pspn	1.00636237307695	0.379910828617012	1.17888523637533	0.322262775794112	0.747253630689198	0.835335113709954
ENSMUSG00000002668	70785	Dennd1c	51.7079121018767	2.08367360793553	0.305379676708016	6.82322291515095	8.90203558565112e-12	1.28558619025297e-10
ENSMUSG00000002679	69792	Med6	120.769977664032	0.203844013780042	0.150698735774028	1.35265908325671	0.176164567741596	0.291224082465811
ENSMUSG00000002688	18760	Prkd1	41.0222764198453	-0.440876121427479	0.266938413953302	-1.65160238610171	0.0986156332944591	0.183351765692188
ENSMUSG00000002699	16822	Lcp2	84.9432891835707	3.4147254700231	0.30413262210566	11.2277513881322	2.97965081038068e-29	3.7671560675046e-27
ENSMUSG00000002718	110750	Cse1l	807.993556400198	-0.427186963527313	0.0938257410656157	-4.55298256827586	5.28906572109783e-06	2.89500840319745e-05
ENSMUSG00000002728	67877	Naa20	456.031299958413	-0.30264238397942	0.113851344904225	-2.65822405729166	0.00785536495224931	0.0213538267954035
ENSMUSG00000002731	23992	Prkra	94.4224780581709	0.966519083791633	0.20442192344665	4.7280598259505	2.2667540277556e-06	1.33733945044338e-05
ENSMUSG00000002732	14231	Fkbp7	148.303669093915	1.02036566207377	0.205047279875202	4.97624578436151	6.48293207500455e-07	4.19203841235311e-06
ENSMUSG00000002733	83435	Plekha3	191.581574654441	-0.443501730782555	0.190368645072186	-2.32969946607742	0.0198220407914574	0.0477064419359656
ENSMUSG00000002741	56418	Ykt6	900.877655588126	-0.109713692502323	0.0747139098156498	-1.46845069108325	0.141981840824951	0.245363670919965
ENSMUSG00000002748	22385	Baz1b	825.723508221387	-0.284554227376984	0.122343536113231	-2.32586237423794	0.0200258938385907	0.0481163134226044
ENSMUSG00000002763	224824	Pex6	462.552203814862	-0.383975035210634	0.114312452734961	-3.35899568265672	0.000782262895327825	0.00271715384239269
ENSMUSG00000002767	27398	Mrpl2	936.246078093651	-0.338001188576366	0.133062079663025	-2.54017665613181	0.0110796489981745	0.0287822269701728
ENSMUSG00000002768	17256	Mea1	227.324027730647	0.301926442713446	0.123340186500448	2.44791621676645	0.0143685062982389	0.0360489624779775
ENSMUSG00000002769	14711	Gnmt	18.5394819189364	-0.471896249991936	0.431578656136997	-1.09341887806922	0.274209928627114	0.410707043327826
ENSMUSG00000002771	14814	Grin2d	16.5876459966177	0.691055544478559	0.341340392372889	2.02453492150332	0.042915142608579	0.0920957262186396
ENSMUSG00000002778	68137	Kdelr1	666.963724354067	0.392621426599286	0.101070841094444	3.88461619936861	0.000102491665608104	0.000432994720141824
ENSMUSG00000002781	70209	Tmem143	755.757280972186	-0.913377165892354	0.161161605271499	-5.66746133084022	1.44928748931148e-08	1.25914488110164e-07
ENSMUSG00000002791	NA	Pdxk-ps	0.863603805767995	1.96089755471721	1.65065567005781	1.18795069758463	0.234852834271588	0.365161250088191
ENSMUSG00000002797	110175	Ggct	124.101362517589	-0.633146852408043	0.2204836583526	-2.87162711803116	0.00408364504781904	0.0119015354469601
ENSMUSG00000002799	16450	Jag2	564.486935198931	-0.364959285387839	0.157644469438094	-2.31507826876956	0.020608649067223	0.0493038123957895
ENSMUSG00000002803	399566	Btbd6	202.612956315457	-0.694275586412116	0.116435087057637	-5.96276950493831	2.47998138384604e-09	2.43021665992863e-08
ENSMUSG00000002804	66174	Nudt14	105.689769901614	1.19594580575049	0.237781210727176	5.02960600668607	4.91488714205848e-07	3.24634596870325e-06
ENSMUSG00000002808	105298	Epdr1	1566.27069254089	-0.633147919711978	0.137134097026643	-4.61699849592452	3.89330090539789e-06	2.1891717614854e-05
ENSMUSG00000002812	14248	Flii	1391.79502002725	-0.361535193937411	0.124915979098953	-2.89422695595268	0.00380093322205451	0.0111676121813657
ENSMUSG00000002814	21975	Top3a	76.1623772596906	0.466312217167638	0.16901475448303	2.75900301481939	0.00579780000888684	0.0163247796943763
ENSMUSG00000002820	235040	Atg4d	572.298988587201	-0.83033365871626	0.112508452715251	-7.38018912070335	1.58064843401104e-13	2.96560022445938e-12
ENSMUSG00000002825	60507	Qtrt1	78.7755648128655	0.570661731364202	0.169091258100967	3.37487424112398	0.000738494295348036	0.00258134170497802
ENSMUSG00000002831	57435	Plin4	2188.14000841624	-1.32002992456567	0.304569845024009	-4.33407950961664	1.46371270137309e-05	7.35778985746958e-05
ENSMUSG00000002833	15193	Hdgfl2	465.194749133891	-0.0127140798496218	0.0857801913029629	-0.148216967769605	0.882171541372756	0.926848316380496
ENSMUSG00000002835	27221	Chaf1a	36.7384659053009	1.33801513916766	0.498596537267604	2.68356283920505	0.00728422847084553	0.019956578081253
ENSMUSG00000002844	11544	Adprh	624.816896712001	0.43944055644671	0.0898528090366781	4.89067132300037	1.00492647187211e-06	6.28132384966344e-06
ENSMUSG00000002845	67846	Tmem39a	147.514676784067	0.187371498314684	0.186927377896065	1.002375898189	0.316162078147932	0.456160898523999
ENSMUSG00000002846	76916	Timmdc1	429.111013412622	-0.459218512287589	0.139642206885141	-3.28853662893848	0.00100709678866648	0.00341184458669058
ENSMUSG00000002847	85031	Pla1a	125.781964289724	-0.0443786071135025	0.176645037622583	-0.251230420683094	0.801635966309974	0.871911859065602
ENSMUSG00000002870	17216	Mcm2	171.859969500401	0.710946813521948	0.296581103780296	2.39714130286807	0.0165235502666384	0.0407122577588337
ENSMUSG00000002871	24100	Tpra1	394.431806885985	0.402987804382292	0.128959196737915	3.12492489544029	0.00177850462221259	0.00565695682274379
ENSMUSG00000002881	17936	Nab1	272.471854668772	0.267307576011331	0.171534635851707	1.55833004036818	0.119155031318585	0.213544385199879
ENSMUSG00000002885	26364	Adgre5	351.408517336187	0.729288231145916	0.114833458532314	6.35083398572984	2.14150722476005e-10	2.50466406855023e-09
ENSMUSG00000002897	16172	Il17ra	125.71630618364	1.62380231447777	0.334226858912522	4.85838367317683	1.18347907721754e-06	7.29995115932331e-06
ENSMUSG00000002900	16777	Lamb1	1050.78699456681	0.789839061701039	0.146002664491114	5.40975785924175	6.31100208050502e-08	4.92454111605632e-07
ENSMUSG00000002908	84036	Kcnn1	235.581199208082	-1.2139701199644	0.173780308089343	-6.98565984438399	2.83520252623535e-12	4.44656420552953e-11
ENSMUSG00000002910	70807	Arrdc2	444.389621515096	-2.33984986768373	0.697991968622217	-3.35225901281131	0.000801549901116255	0.00277479260241958
ENSMUSG00000002930	19051	Ppp1r17	0	NA	NA	NA	NA	NA
ENSMUSG00000002944	12491	Cd36	3968.74212314841	-0.406573696379095	0.161094974304505	-2.52381365796416	0.0116089446317938	0.0300000366052391
ENSMUSG00000002948	26400	Map2k7	666.513361183037	-0.603619742852384	0.0932321017608633	-6.47437665194597	9.52041466553321e-11	1.1790667393468e-09
ENSMUSG00000002949	21856	Timm44	916.756763276876	-0.168944536759919	0.110070793074733	-1.53487162253126	0.124815365294169	0.221811297451855
ENSMUSG00000002957	11772	Ap2a2	1175.43234511098	0.00896840814377169	0.120208065613796	0.0746073742887219	0.940527106644888	0.963031881057799
ENSMUSG00000002963	59047	Pnkp	339.869295399262	0.0748970115361439	0.121496588315779	0.61645361877554	0.537595174408019	0.669168963167459
ENSMUSG00000002968	75613	Med25	922.632931896551	-0.555482309986286	0.0852346196603017	-6.51709730389053	7.16809307042558e-11	9.09606293074694e-10
ENSMUSG00000002980	57278	Bcam	1022.01566175188	0.40196638705495	0.124219088717062	3.23594699660471	0.00121239894455889	0.00402596156130674
ENSMUSG00000002981	56457	Clptm1	1054.30244326006	-0.0132278330848958	0.0689250355608533	-0.191916231558808	0.847807822833099	0.905265472173291
ENSMUSG00000002983	19698	Relb	195.112278284329	0.824764420222881	0.159240201679546	5.1793731201285	2.22632775471266e-07	1.56962580804374e-06
ENSMUSG00000002984	53333	Tomm40	432.745724829694	0.318285362063307	0.17130549216544	1.85799858510035	0.0631692152349609	0.126904970516872
ENSMUSG00000002985	11816	Apoe	11776.0638241071	3.04149214605272	0.372564101625003	8.1636747415726	3.2498325619876e-16	8.91778288115053e-15
ENSMUSG00000002992	11813	Apoc2	0.136909032748469	0.569145655227189	4.32794324778021	0.131504879487295	0.895375926824784	NA
ENSMUSG00000002996	73389	Hbp1	284.100040028925	-0.58119566762999	0.133454212988404	-4.35501925803191	1.33055220061222e-05	6.73710558973384e-05
ENSMUSG00000002997	19088	Prkar2b	115.600699589689	-0.567037950487643	0.520783094301751	-1.0888178911566	0.276234200318928	0.412898701688001
ENSMUSG00000003031	12576	Cdkn1b	676.753238752099	-0.246000080956777	0.114340160858043	-2.15147572918139	0.031438669509742	0.0708306659294592
ENSMUSG00000003032	16600	Klf4	604.305158376085	-0.761633866530036	0.42138331590428	-1.8074608979133	0.0706904461785273	0.139298978279508
ENSMUSG00000003033	11767	Ap1m1	347.866405379365	-0.0421459187759056	0.116454780985886	-0.361908016305604	0.71742076929665	0.812921714063087
ENSMUSG00000003037	17274	Rab8a	292.02413621285	0.97661101872452	0.132636407548369	7.36306898517568	1.79729429112808e-13	3.34283761295736e-12
ENSMUSG00000003038	15331	Hmgn2	570.332550907173	1.21072998045081	0.203518671673012	5.94898723786903	2.69806673098792e-09	2.63141311841926e-08
ENSMUSG00000003039	67922	Fam32a	278.682311762183	0.72899159457459	0.100966285347639	7.22014870671517	5.19307545119066e-13	9.03348856158644e-12
ENSMUSG00000003051	13710	Elf3	5.57854844713478	-0.305930018128739	0.632551881140224	-0.48364415196628	0.62863843459348	0.744746796507854
ENSMUSG00000003053	13095	Cyp2c29	0.924378941298444	-1.4763757400499	4.32147743640228	-0.34163680402761	0.73262423631738	0.82471179275122
ENSMUSG00000003062	76205	Stard3nl	115.01835166305	0.99942165669682	0.183824021079068	5.43683927067909	5.42340194349511e-08	4.29206863485204e-07
ENSMUSG00000003068	20869	Stk11	1623.49735449696	-0.720756091624368	0.102747646204117	-7.01481852141435	2.30247615598718e-12	3.63318749024378e-11
ENSMUSG00000003070	13637	Efna2	21.643239050548	1.92352671793515	0.397368315864969	4.84066454505344	1.29405655816477e-06	7.92508693927476e-06
ENSMUSG00000003072	66043	Atp5d	4886.51425792281	-0.269896326355024	0.137078068268327	-1.96892420329931	0.0489617957332528	0.102854708101006
ENSMUSG00000003099	19060	Ppp5c	884.37234981246	-0.552844284681857	0.0745325000129572	-7.41749283313651	1.1935814499621e-13	2.26912606280617e-12
ENSMUSG00000003119	69131	Cdk12	133.092902546612	-0.174124382594477	0.211730969913703	-0.822385042043905	0.410857789749019	0.554353654626165
ENSMUSG00000003123	16890	Lipe	450.812480840991	-0.490712624791109	0.2508279107579	-1.95637169447521	0.0504213840736405	0.105341026256041
ENSMUSG00000003131	18475	Pafah1b2	373.088288906723	0.533792006721716	0.117286204383359	4.55119175804322	5.33429032312846e-06	2.91613502016302e-05
ENSMUSG00000003134	54610	Tbc1d8	190.876987241469	0.154227545440502	0.166111197530051	0.928459656746505	0.353169185493295	0.495392294557456
ENSMUSG00000003135	52846	Cnot11	413.752937495911	-0.187542316241471	0.106175338489805	-1.76634535767908	0.0773379263437046	0.150342419214326
ENSMUSG00000003153	20527	Slc2a3	68.2931603442236	-0.839442437906282	0.254786077229241	-3.29469509101553	0.000985285251304248	0.00334510024034233
ENSMUSG00000003154	60611	Foxj2	475.685084383547	-0.74774511105184	0.126693340451683	-5.90200801704339	3.59103710201836e-09	3.43406462173524e-08
ENSMUSG00000003161	109552	Sri	335.106464872305	0.879754333459804	0.110819153138137	7.93864876735869	2.04395664181391e-15	4.94968959747369e-14
ENSMUSG00000003166	13356	Dgcr2	271.895018931283	0.114486256387982	0.110650088793987	1.03466935847776	0.300823350632486	0.43892435640288
ENSMUSG00000003184	54131	Irf3	317.100925676321	0.599107496028059	0.125113300859237	4.78851962112408	1.68016138359381e-06	1.01005734518965e-05
ENSMUSG00000003190	75736	Bcl2l12	49.8466149211322	0.22287435432123	0.19612190229021	1.13640726363868	0.255786157243844	0.389006208663334
ENSMUSG00000003198	224893	Zfp959	44.7984626462599	0.45428890978467	0.241189267026075	1.88353700554824	0.0596276297404117	0.120767193483086
ENSMUSG00000003199	68047	Mpnd	671.837252086029	-0.525006437518938	0.126288262712165	-4.15720690303206	3.22162197645669e-05	0.000151163901846128
ENSMUSG00000003200	20405	Sh3gl1	332.516944241912	0.858143380802142	0.127595634847952	6.72549168178626	1.75000490192162e-11	2.41554594901546e-10
ENSMUSG00000003206	50498	Ebi3	10.579664581216	4.00883969814858	0.746263216924508	5.37188435290938	7.79180768603942e-08	5.99826570018306e-07
ENSMUSG00000003208	72886	Yju2	83.5579190503021	0.431135589507188	0.182114896383438	2.36738233976996	0.0179144152176627	0.0436796342647411
ENSMUSG00000003226	19386	Ranbp2	741.505630484967	-0.194767394493213	0.11746434936896	-1.65809792962323	0.0972977017300893	0.18147443544698
ENSMUSG00000003227	13608	Edar	2.36693653859961	0.0178804000490309	0.861901250597452	0.0207453000406214	0.983448832577565	0.990265239893622
ENSMUSG00000003228	14773	Grk5	125.479700916316	0.376528029480439	0.212253173241054	1.77395712738212	0.0760702421308441	0.148249161041761
ENSMUSG00000003233	13544	Dvl3	463.211940929572	-0.44143492169387	0.116857893064895	-3.77753620329888	0.000158387486682924	0.000642909065503586
ENSMUSG00000003234	27406	Abcf3	667.787233687291	-0.235927480181922	0.0893935548094256	-2.63920011554397	0.00831019101055419	0.0224333791387871
ENSMUSG00000003235	224045	Eif2b5	710.486011657048	-0.324003142590077	0.0748555374926239	-4.32837908113349	1.50210764972912e-05	7.54090973096657e-05
ENSMUSG00000003269	19158	Cyth2	286.764880447602	0.312381519065543	0.1395302724487	2.23880820687421	0.0251683980649938	0.0585340647018838
ENSMUSG00000003271	54200	Sult2b1	0.513679907290452	-2.12647060623763	2.02238991113928	-1.05146420802689	0.293045439663485	NA
ENSMUSG00000003271	545963	Sult2b1	0.513679907290452	-2.12647060623763	2.02238991113928	-1.05146420802689	0.293045439663485	NA
ENSMUSG00000003273	12348	Car11	65.4902715888981	-1.23965485962035	0.211199401785783	-5.86959455916321	4.36862137395268e-09	4.12407463465034e-08
ENSMUSG00000003279	224997	Dlgap1	3.34706227303357	0.0107529127445583	0.810910998606595	0.013260287211587	0.989420131615214	0.994175468745427
ENSMUSG00000003282	56711	Plag1	2.18916007395385	-1.49694669869624	1.02296306151014	-1.46334384399608	0.143373316334352	0.247358406216564
ENSMUSG00000003283	15162	Hck	75.1166231287478	3.63535728188875	0.305222521086304	11.9105145614757	1.04331422755165e-32	1.93699275688147e-30
ENSMUSG00000003299	66163	Mrpl4	630.545485613937	-0.315636303477525	0.128058947593652	-2.46477352351106	0.0137099877674526	0.0346456686586956
ENSMUSG00000003308	50868	Keap1	905.790586163037	-0.71555207663629	0.102978842252796	-6.94853487359788	3.69099270297322e-12	5.68065553568873e-11
ENSMUSG00000003309	11768	Ap1m2	0.200919547392352	0	4.06329082246608	0	1	NA
ENSMUSG00000003316	20340	Glg1	1245.05581527169	0.462780563397684	0.115396925464435	4.01033703051568	6.063213816224e-05	0.000268480254243112
ENSMUSG00000003341	67331	Atp8b3	0	NA	NA	NA	NA	NA
ENSMUSG00000003344	208198	Btbd2	473.54038790409	-0.447584240954824	0.102145641524238	-4.38182417062424	1.1768977216446e-05	6.01973399048198e-05
ENSMUSG00000003345	103236	Csnk1g2	1579.45180956297	-0.213691746547194	0.0734186557385151	-2.91059192514052	0.00360744831462151	0.0106568656633773
ENSMUSG00000003346	216169	Abhd17a	867.010518323145	-0.251290126697158	0.125554424884219	-2.00144381154935	0.0453445832701238	0.0964057744795946
ENSMUSG00000003348	208228	Mob3a	31.3432315831903	0.885192675967799	0.347977378415234	2.54382247489524	0.0109646794813202	0.0285231147123259
ENSMUSG00000003352	12297	Cacnb3	80.8635054947714	1.16377602741047	0.22868371701739	5.08902007798823	3.59918508928785e-07	2.44067148140981e-06
ENSMUSG00000003354	105833	Ccdc65	1.53854148041781	2.871500399785	1.43656516388362	1.99886539920136	0.0456229193698738	0.0969375319491039
ENSMUSG00000003355	66120	Fkbp11	24.598671448622	2.27004217527704	0.395010425226403	5.74679054097358	9.09532831875176e-09	8.15295893835739e-08
ENSMUSG00000003360	74351	Ddx23	1090.8335443137	-0.497908676085464	0.106349208375773	-4.681827760543	2.8432833730742e-06	1.64590965596385e-05
ENSMUSG00000003363	18807	Pld3	728.810741827087	2.61479757506899	0.24177868525718	10.8148390842957	2.92806083025574e-27	3.01707387949551e-25
ENSMUSG00000003378	14809	Grik5	95.0162675522968	0.290413601722418	0.150643864556032	1.92781566364024	0.0538780587068094	0.111232121201155
ENSMUSG00000003379	12518	Cd79a	4.62063686337117	1.08496306135734	0.7375700132033	1.47099670802138	0.141292007151124	0.244396985342485
ENSMUSG00000003380	14470	Rabac1	1946.14986842269	-0.227529120771852	0.105396631523855	-2.15878930362547	0.0308665167022868	0.0696863689965739
ENSMUSG00000003382	27049	Etv3	219.091182342454	0.00653169469133187	0.127035148408457	0.0514164368929651	0.958993687350091	0.974263835785589
ENSMUSG00000003402	19089	Prkcsh	486.861499395746	0.548419248806087	0.137201701627968	3.99717527041438	6.41028385589565e-05	0.000282694478284395
ENSMUSG00000003410	15571	Elavl3	1.17160952921802	2.15047145492923	1.77090295402387	1.2143361385461	0.224619390954745	0.352521240483998
ENSMUSG00000003411	69908	Rab3b	2.14989547358761	-0.80478649064635	0.960985682351993	-0.837459397601691	0.402334390384491	0.546127461272796
ENSMUSG00000003418	241230	St8sia6	20.835122406176	-0.754283811460921	0.30377094820549	-2.48306763999918	0.0130256351498621	0.0331316081422313
ENSMUSG00000003420	14132	Fcgrt	1064.92465067804	0.696993510896855	0.148945784607323	4.67951149295288	2.87559240750262e-06	1.66181178726343e-05
ENSMUSG00000003421	66394	Nosip	332.617917811095	0.15168430599399	0.130265169664114	1.1644271940466	0.244250932388857	0.375649296018861
ENSMUSG00000003423	68845	Pih1d1	295.770454858072	-0.0594271386259531	0.120887629977161	-0.491589905742882	0.623009280795028	0.74021189153208
ENSMUSG00000003429	27207	Rps11	743.197727372331	0.700899287561217	0.172220332437983	4.06978245622428	4.70570571641898e-05	0.000213085439252829
ENSMUSG00000003435	20924	Supt5	828.094222963706	-0.435568824623595	0.111716839102337	-3.89886455903568	9.6644811370107e-05	0.000410312375919894
ENSMUSG00000003436	13389	Dll3	0.0493838546533454	0	4.32794324778021	0	1	NA
ENSMUSG00000003437	54624	Paf1	453.05709663857	0.0302642983230933	0.108795557069449	0.278175866168637	0.780877360005858	0.857479652315272
ENSMUSG00000003438	66525	Timm50	645.399007095422	-0.141350529730842	0.103667850382361	-1.36349436406268	0.172726759479009	0.286529265019997
ENSMUSG00000003444	67224	Med29	109.232175696897	0.028274067710292	0.171982629317076	0.164400717808335	0.869415698532989	0.919429297242666
ENSMUSG00000003452	12121	Bicd1	16.6877474414056	1.05258823163528	0.428317871557945	2.45749314126594	0.0139910482319068	0.0352694216468667
ENSMUSG00000003458	59287	Ncstn	579.416099937893	0.519290772167153	0.079039123004707	6.57004724275885	5.02993006520045e-11	6.49072002402322e-10
ENSMUSG00000003464	19298	Pex19	1267.29478096629	-0.34209315905037	0.093474241029875	-3.65975861671918	0.000252452944082371	0.000984771961319232
ENSMUSG00000003469	105653	Phyhip	8.4154040081051	-1.25504993374139	0.545694204168979	-2.29991435524346	0.0214530726457717	0.0510631694483788
ENSMUSG00000003476	12922	Crhr2	438.11199516021	-0.950140651758435	0.196199541823559	-4.84272614975264	1.28069741648069e-06	7.85330104521723e-06
ENSMUSG00000003477	21743	Inmt	112.576322518425	-1.70235386857655	0.296710727038518	-5.73741935644799	9.61300265702059e-09	8.59083949505118e-08
ENSMUSG00000003484	72054	Cyp4f18	39.7803675518571	3.58686603588384	0.419792171023486	8.54438525410987	1.29222285752382e-17	4.29518203997593e-16
ENSMUSG00000003500	23917	Impdh1	299.379736036705	0.465353572913881	0.122696762785075	3.79271271996825	0.000149010508987357	0.000607239187109245
ENSMUSG00000003505	26438	Psg18	0	NA	NA	NA	NA	NA
ENSMUSG00000003518	72349	Dusp3	1406.31258779385	-0.62929014019303	0.112482748753036	-5.59454802775741	2.21197233893347e-08	1.86134446552637e-07
ENSMUSG00000003526	19125	Prodh	74.8439155833098	-1.191999126887	0.194649165504806	-6.12383373848866	9.13502191480002e-10	9.56092085425083e-09
ENSMUSG00000003527	27886	Ess2	143.944845145999	0.182687079103781	0.133236146532333	1.37115252773727	0.170327413250959	0.283347379098785
ENSMUSG00000003528	13358	Slc25a1	305.043087131152	-0.186280221505981	0.4305245375415	-0.432682008253767	0.66524580232791	0.77401679620447
ENSMUSG00000003531	13353	Dgcr6	369.031487201769	-0.146320532143018	0.132109237795166	-1.10757229838754	0.268046572513473	0.403204654478661
ENSMUSG00000003534	12305	Ddr1	300.614464496348	0.318385975432813	0.120062508223215	2.65183511609538	0.00800556254603781	0.0217248660717339
ENSMUSG00000003541	15937	Ier3	106.471936188363	0.15438850982436	0.358499741610316	0.430651662762362	0.666721670415367	0.774946428873089
ENSMUSG00000003545	14282	Fosb	182.257078958471	-0.432838517091717	0.877695454169509	-0.493153422449108	0.621904185882033	0.739239860567396
ENSMUSG00000003546	74764	Klc4	294.763742566607	0.37329659775145	0.113141573455255	3.29937605029934	0.000969000091937634	0.00329632781357721
ENSMUSG00000003549	13870	Ercc1	211.639550636138	0.0363316075011137	0.178594692023206	0.203430500030722	0.838798562607454	0.898578820929168
ENSMUSG00000003555	13074	Cyp17a1	0.351110621620618	0.615140627914801	2.67176436149045	0.230237605075188	0.817907142035193	NA
ENSMUSG00000003559	57344	As3mt	385.895194670937	-0.76450734507155	0.151973053779163	-5.03054538985891	4.89086580190213e-07	3.23255171409876e-06
ENSMUSG00000003573	26558	Homer3	63.0243569163278	0.645846115951817	0.228070443711892	2.83178348513969	0.00462891809060582	0.0133248699554693
ENSMUSG00000003575	382056	Crtc1	210.714774594182	-0.345043756893563	0.122681226441486	-2.81252288473116	0.00491545256369121	0.0140632578692973
ENSMUSG00000003581	71673	Rnf215	119.015032814275	0.416049600905073	0.134468087658673	3.09403969483936	0.00197451066471074	0.00621042670609875
ENSMUSG00000003585	67815	Sec14l2	12.3576728744597	1.80437504435384	0.462401911817558	3.90217903135694	9.53306039952784e-05	0.000405568349945231
ENSMUSG00000003604	74268	Aven	250.849516488339	-0.0662353741241299	0.137893371429682	-0.480337622014748	0.630987341271588	0.746634538867988
ENSMUSG00000003617	12870	Cp	192.212354295919	-0.517261344931451	0.176135350007618	-2.93672647148389	0.00331696526922803	0.00987661035518728
ENSMUSG00000003623	74114	Crot	459.830008863182	-0.715732258758967	0.107236686820631	-6.67432275258685	2.48376461186432e-11	3.3542215675819e-10
ENSMUSG00000003644	20111	Rps6ka1	177.860910780407	0.658610180239392	0.16885157670582	3.9005272742395	9.59834114684299e-05	0.000407924550121964
ENSMUSG00000003657	12308	Calb2	0.062701201125813	0	4.32794324778021	0	1	NA
ENSMUSG00000003660	320632	Snrnp200	838.988484958092	-0.480046348931082	0.13522399022037	-3.55000875324539	0.000385218342593109	0.00143971512892859
ENSMUSG00000003662	26371	Ciao1	447.114620263219	-0.284979916169662	0.101883530045582	-2.7971146665429	0.00515612304202842	0.0146845472153291
ENSMUSG00000003665	15116	Has1	45.8110604733177	2.38078741563548	1.03855290483045	2.29240841228417	0.0218820870551631	0.0519283797826808
ENSMUSG00000003680	225895	Taf6l	166.156676416411	0.858232134730287	0.152192814445479	5.63911074157667	1.70930585841475e-08	1.47017425418243e-07
ENSMUSG00000003680	100039957	Taf6l	166.156676416411	0.858232134730287	0.152192814445479	5.63911074157667	1.70930585841475e-08	1.47017425418243e-07
ENSMUSG00000003721	72999	Insig2	734.716974008135	-0.58948912744143	0.125300194560447	-4.70461462178377	2.5434593864542e-06	1.48402069750985e-05
ENSMUSG00000003731	16650	Kpna6	1101.74587428163	-0.798849216491776	0.143218559194529	-5.57783307543771	2.43533175810023e-08	2.03599662762392e-07
ENSMUSG00000003746	17155	Man1a	453.668640331593	0.766906049910033	0.150526842408685	5.09481257720042	3.49086430543334e-07	2.37268244084335e-06
ENSMUSG00000003752	233011	Itpkc	51.5756175261187	0.41337933123139	0.401066290138409	1.03070076293057	0.30268116688337	0.440854723806099
ENSMUSG00000003762	76889	Coq8b	60.9184550080626	1.44777770035652	0.278824029993934	5.19244234576201	2.07553154174901e-07	1.47440723930933e-06
ENSMUSG00000003778	78656	Brd8	242.041488455083	0.257441201033565	0.129369189300895	1.98997305637273	0.0465939036308268	0.0987156539553899
ENSMUSG00000003779	19348	Kif20a	25.1695506803787	1.79253665362151	0.445635345579738	4.02242926060892	5.76009567996473e-05	0.00025582769778602
ENSMUSG00000003808	66590	Farsa	362.93581561023	0.14017139046303	0.102868668362005	1.3626247203838	0.173000813866127	0.28686842389388
ENSMUSG00000003809	270076	Gcdh	374.190792147562	-0.43554512748752	0.119978536212459	-3.63019204298552	0.000283210425064647	0.00109275424821798
ENSMUSG00000003810	17776	Mast2	1416.54933328772	-0.919588216944882	0.13514796998167	-6.80430654688788	1.015371273308e-11	1.45210070786476e-10
ENSMUSG00000003812	13423	Dnase2a	165.507880709877	2.29455347291572	0.221360006932981	10.3657092566429	3.55114107471384e-25	2.90404425665487e-23
ENSMUSG00000003812	100503676	Dnase2a	165.507880709877	2.29455347291572	0.221360006932981	10.3657092566429	3.55114107471384e-25	2.90404425665487e-23
ENSMUSG00000003813	19358	Rad23a	1122.65935201239	-0.667598455806924	0.110649606014662	-6.03344629820428	1.60499343808871e-09	1.62215325022718e-08
ENSMUSG00000003814	12317	Calr	3517.65960643484	0.895546735098826	0.155758916893995	5.74956961024781	8.9470911055344e-09	8.04106644146764e-08
ENSMUSG00000003824	71846	Syce2	16.7791761243296	1.8188223259433	0.509544726952199	3.56950475539692	0.000357656725552222	0.00134696451026685
ENSMUSG00000003847	54446	Nfat5	417.162726574891	0.0373526422368385	0.146279048496244	0.255351963393429	0.798451268808523	0.869682514995292
ENSMUSG00000003848	67619	Nob1	313.228347244674	-0.218468862283459	0.117655016152464	-1.85685973643788	0.063331112233571	0.127143454545488
ENSMUSG00000003849	18104	Nqo1	194.3072639135	-1.00247812566205	0.318064411757211	-3.15180852873059	0.0016226263723944	0.00521263979459139
ENSMUSG00000003863	76787	Ppfia3	11.4987367579226	-0.28930081353214	0.437672888921259	-0.660997792769814	0.508613729071889	0.643827501763728
ENSMUSG00000003865	14936	Gys1	5134.67431425979	-0.892573726699649	0.13734334685698	-6.49884939551617	8.09366352714222e-11	1.01394661378326e-09
ENSMUSG00000003868	20174	Ruvbl2	361.53134613856	-0.141341015511987	0.154621498037803	-0.914109727985112	0.360659191394194	0.503588631767162
ENSMUSG00000003872	22342	Lin7b	1.58157689336612	0.5832136028829	1.0352204969984	0.563371382786485	0.573182019665475	0.699293807054431
ENSMUSG00000003873	12028	Bax	134.923736841231	0.936078145285097	0.171601466045784	5.45495424284632	4.89854578693564e-08	3.90368258225714e-07
ENSMUSG00000003882	16197	Il7r	68.1776404498064	6.90261371831803	0.969688930399329	7.11837941212287	1.0920341803565e-12	1.80470251714409e-11
ENSMUSG00000003923	21780	Tfam	514.296290451801	-0.274911282488771	0.112246700186937	-2.44917028323266	0.0143185737192993	0.0359423251717741
ENSMUSG00000003929	224694	Zfp81	56.7291616286176	0.0494437251141774	0.179586676635901	0.275319561786986	0.783070736862366	0.859079774700097
ENSMUSG00000003934	13643	Efnb3	14.885774583044	-2.39015335002669	0.481073124971117	-4.96837845633175	6.75150972207261e-07	4.34797226101476e-06
ENSMUSG00000003948	67468	Mmd	215.606376917195	0.0170061498119863	0.216736065498481	0.0784647897564859	0.93745833754556	0.961319615360357
ENSMUSG00000003949	217082	Hlf	75.5236858927448	-2.91667993836851	0.253007176995061	-11.5280521802172	9.52749177695086e-31	1.42080109406094e-28
ENSMUSG00000003955	70186	Fam162a	690.03907997931	-0.203797642808253	0.133165175755523	-1.53041244944102	0.125914669349753	0.223279336194337
ENSMUSG00000003970	26961	Rpl8	4592.0514068875	0.457708392040303	0.130601702854822	3.50461274267684	0.00045727190597101	0.00168306116060914
ENSMUSG00000003974	108069	Grm3	0	NA	NA	NA	NA	NA
ENSMUSG00000003992	66970	Ssbp2	145.352147288428	-0.157400071559764	0.137991793860634	-1.14064805707745	0.254016410177212	0.387072625031942
ENSMUSG00000004018	67030	Fancl	33.3545225407788	0.220350007006009	0.258673701497921	0.851845416561529	0.394299895271642	0.538163603004041
ENSMUSG00000004031	240843	Brinp2	3.4485230406037	-2.0339091971819	0.785637214203744	-2.58886564995945	0.00962926550718222	0.0254998591071718
ENSMUSG00000004032	14866	Gstm5	376.906280728545	-0.606369630026077	0.1371922264688	-4.41985413921376	9.87675425192016e-06	5.12179546108633e-05
ENSMUSG00000004035	68312	Gstm7	31.8125497108241	-0.793351769708743	0.311844881187965	-2.54405897793316	0.0109572581942365	0.028507407759983
ENSMUSG00000004038	14864	Gstm3	0.774794393861606	-0.155633695166318	1.67999172974046	-0.0926395603092415	0.926189914286659	0.955397024407822
ENSMUSG00000004040	20848	Stat3	1125.37360622855	0.546559442894902	0.25194769100309	2.16933697911206	0.030057109717143	0.0681501724118036
ENSMUSG00000004043	20850	Stat5a	279.024004190642	0.279313072490678	0.142348815607375	1.96217349121524	0.0497422890843898	0.104228682608145
ENSMUSG00000004044	19285	Cavin1	3319.21148574597	0.243717935907208	0.0819661912506767	2.97339588662656	0.00294524305984054	0.0088879146254494
ENSMUSG00000004054	26403	Map3k11	457.654665768175	0.361806218604369	0.0989556590299141	3.65624585952175	0.000255935900088708	0.000996848805335114
ENSMUSG00000004056	11652	Akt2	2986.83531959146	-0.563882672818647	0.0959809020664953	-5.87494658497781	4.22979712221081e-09	3.9985164722257e-08
ENSMUSG00000004069	83945	Dnaja3	1313.87105296351	-0.741493861088752	0.099004721864146	-7.48947976548258	6.91471431371978e-14	1.35842166422438e-12
ENSMUSG00000004070	15369	Hmox2	369.07384838755	0.261707929711527	0.110190083757749	2.37505881461066	0.0175461541165836	0.0428882865655979
ENSMUSG00000004071	66626	Cdip1	936.173662254564	-0.682049752580393	0.102386892843981	-6.66149478351406	2.71056421982237e-11	3.6343075759336e-10
ENSMUSG00000004085	65964	Map3k20	2806.09316413137	-0.923716495050205	0.129568039420759	-7.1292002192804	1.00953794503272e-12	1.67778693316406e-11
ENSMUSG00000004096	66070	Cwc15	734.574004887321	-0.09634048215066	0.0993362453652649	-0.969842194019018	0.332125157375671	0.473100389655488
ENSMUSG00000004098	53867	Col5a3	1958.01374829683	0.856184573791031	0.0938599114036062	9.1219409968262	7.37907012300246e-20	3.16808077280905e-18
ENSMUSG00000004099	13433	Dnmt1	246.750672926114	0.957299517134683	0.225020886306526	4.2542696051363	2.09732480639857e-05	0.000102445294169855
ENSMUSG00000004100	235036	Ppan	148.015028340933	1.08843142789938	0.238866574423767	4.5566502158164	5.19758716825876e-06	2.85023619913455e-05
ENSMUSG00000004105	26360	Angptl2	1356.16442496519	0.891849993444265	0.19579769866016	4.55495646551098	5.23964285913919e-06	2.87177021386012e-05
ENSMUSG00000004110	12290	Cacna1e	0.810761801118236	0.104024210728218	1.64654265156537	0.0631773556727012	0.949625276306222	0.968424088969694
ENSMUSG00000004113	12287	Cacna1b	2.30163758984915	1.07512020312528	1.03640120796857	1.03735907953311	0.299568541557146	0.437652514948097
ENSMUSG00000004127	108943	Trmt10a	31.1252011096453	0.325231881593379	0.290870666838614	1.11813227895486	0.263510502120308	0.398008240083209
ENSMUSG00000004151	14009	Etv1	59.9949807630845	0.214371697882864	0.188392849699814	1.13789720907372	0.255163406811974	0.388397837810761
ENSMUSG00000004187	16581	Kifc2	55.3297001184326	-0.356088546173541	0.234047719748106	-1.52143565661217	0.128150546635072	0.22631986160387
ENSMUSG00000004207	19156	Psap	16566.1684235633	0.684648867430856	0.124870038443252	5.48289146032415	4.18429760695956e-08	3.36573009696419e-07
ENSMUSG00000004221	16151	Ikbkg	277.362714991744	-0.228777126961075	0.0997160200025917	-2.29428658459421	0.0217740426494579	0.0516957915806485
ENSMUSG00000004231	18504	Pax2	0.0500487832089931	-0.873495337950308	4.32794324778021	-0.201826892808338	0.840052056737723	NA
ENSMUSG00000004233	70560	Wars2	71.3204875240572	-0.441401022066486	0.181572258035461	-2.4309937368311	0.0150574748451452	0.0375216978970679
ENSMUSG00000004263	13498	Atn1	130.629198872611	-0.0863748805142225	0.142467178188417	-0.606279155750453	0.544329397655491	0.674763863064275
ENSMUSG00000004264	12034	Phb2	1269.53894207091	-0.233710745714597	0.0865127240156048	-2.701460951252	0.00690355863646178	0.019037185382571
ENSMUSG00000004266	15170	Ptpn6	176.682643960794	3.60260887990629	0.26773393896397	13.4559290235935	2.84145423791772e-41	1.14817037127468e-38
ENSMUSG00000004267	13807	Eno2	34.3863985210441	1.48484404804527	0.27439544568446	5.41132905592302	6.25586956871479e-08	4.88336969969979e-07
ENSMUSG00000004268	14791	Emg1	610.70961620805	-0.0808028138683076	0.101475805382159	-0.796276645097847	0.425871257171147	0.568376736430857
ENSMUSG00000004270	14792	Lpcat3	286.611400041653	-0.299578088492782	0.123643456396965	-2.42291907087236	0.0153963561859346	0.0382459146913863
ENSMUSG00000004285	66144	Atp6v1f	798.923956905531	0.386658764890198	0.140569488879702	2.75065925025237	0.00594754746610698	0.0166836371257643
ENSMUSG00000004296	16160	Il12b	2.01428365330385	3.87305243906949	1.40012218708063	2.76622460154362	0.0056709461752298	0.0159982010649056
ENSMUSG00000004317	12728	Clcn5	129.45109652663	1.86513915573473	0.266000450619031	7.01178945898105	2.35289096185439e-12	3.70140281999201e-11
ENSMUSG00000004319	12725	Clcn3	507.048149922412	-1.02023919773439	0.133602563184608	-7.63637443336061	2.23423945547076e-14	4.73208701935678e-13
ENSMUSG00000004328	53417	Hif3a	9.20520024248467	-1.71562032538303	0.681288182183842	-2.51820062382953	0.0117956111821222	0.0304273319866283
ENSMUSG00000004341	75512	Gpx6	0	NA	NA	NA	NA	NA
ENSMUSG00000004344	14780	Gpx5	0	NA	NA	NA	NA	NA
ENSMUSG00000004347	18575	Pde1c	10.0829982019432	0.367931811672567	0.579521408931988	0.634889075712727	0.525500762377937	0.657929508571356
ENSMUSG00000004356	70683	Utp20	172.069174962842	0.0714444841644742	0.232800897969384	0.306890930351437	0.758926392718701	0.842794910888901
ENSMUSG00000004359	20728	Spic	5.51088120007878	2.45488900158997	0.904810016088073	2.71315409637443	0.00666461068441039	0.0184652187394904
ENSMUSG00000004360	212448	9330159F19Rik	264.289527288859	-1.72416860682067	0.179173101212045	-9.62292104761964	6.39877222626452e-22	3.52582615077164e-20
ENSMUSG00000004364	26554	Cul3	2762.73873856882	-1.25060817413315	0.121214355112354	-10.3173272915898	5.88382302162088e-25	4.73647753240481e-23
ENSMUSG00000004366	20604	Sst	0	NA	NA	NA	NA	NA
ENSMUSG00000004371	16156	Il11	2.34993866221534	1.18311689298932	0.872377424141807	1.35619843000087	0.175036041433904	0.289683805161411
ENSMUSG00000004383	16795	Large1	366.321184463122	-0.215565059612759	0.117511039191656	-1.83442390685679	0.0665910935525484	0.132539043454792
ENSMUSG00000004393	52513	Ddx56	334.692972049353	-0.0755701454428653	0.133802337666407	-0.564789425662167	0.572217000287077	0.698427383434973
ENSMUSG00000004394	103694	Tmed4	780.341377275846	-0.27349576727343	0.0900106829253017	-3.03848119339789	0.0023777394551367	0.0073401250835397
ENSMUSG00000004415	140709	Col26a1	45.9899803091329	1.38915463891597	0.379898696617073	3.65664491951705	0.000255537968805585	0.0009954870436948
ENSMUSG00000004446	12122	Bid	30.5611679558811	2.48646285254138	0.38329551225951	6.48706487034976	8.75246609653227e-11	1.09183305882165e-09
ENSMUSG00000004451	64143	Ralb	271.887536348548	1.00329765695952	0.154370762702616	6.49927252670447	8.0709337625838e-11	1.01171413004457e-09
ENSMUSG00000004455	19047	Ppp1cc	1206.06157465726	-0.457143764768145	0.0913109041889989	-5.0064531594379	5.54421454193826e-07	3.62945277256238e-06
ENSMUSG00000004455	434233	Ppp1cc	1206.06157465726	-0.457143764768145	0.0913109041889989	-5.0064531594379	5.54421454193826e-07	3.62945277256238e-06
ENSMUSG00000004460	67838	Dnajb11	652.981408649532	0.540882085823783	0.088333819588627	6.12315971779196	9.17376528761822e-10	9.57737460978724e-09
ENSMUSG00000004462	70573	Tbccd1	114.009742218575	-0.102734226277227	0.149645319709058	-0.686518138201476	0.492386430432134	0.62931651937146
ENSMUSG00000004473	20256	Clec11a	127.620477557676	0.845035975543425	0.292958882349472	2.88448661725633	0.00392052421699044	0.0114764436170084
ENSMUSG00000004500	243834	Zfp324	49.0117874774001	0.306156172157461	0.216694535614942	1.4128467581734	0.157700786566216	0.266910135476065
ENSMUSG00000004508	14389	Gab2	190.263051919152	0.691052876879742	0.1416750980775	4.87773000518212	1.07313678350596e-06	6.67125274041954e-06
ENSMUSG00000004530	23790	Coro1c	323.466798381997	1.26452384231833	0.21184353295092	5.96914064217056	2.38506455678724e-09	2.34165842716872e-08
ENSMUSG00000004535	52440	Tax1bp1	1030.34935821859	-0.168302994532718	0.097297550743252	-1.72977627131473	0.0836702555043617	0.160397825621757
ENSMUSG00000004540	26437	Psg17	0.663690402296728	0.363556121017833	2.4850262688395	0.146298703388602	0.883685589391934	NA
ENSMUSG00000004542	26439	Psg19	0.315464431994222	-0.873512280021556	3.05967888907971	-0.285491488384355	0.775267624481416	NA
ENSMUSG00000004552	13034	Ctse	3.8854563947738	3.66204845437375	1.14004732678905	3.21218985240545	0.0013172729342756	0.00433025372939089
ENSMUSG00000004558	29811	Ndrg2	20382.8962194568	-0.866114369899778	0.127243710977826	-6.80673616985841	9.98377764683089e-12	1.43177237123097e-10
ENSMUSG00000004561	52535	Mettl17	159.574610916324	-0.0337579287930272	0.115697145321262	-0.291778407317569	0.770456055675218	0.850613864532031
ENSMUSG00000004562	268739	Arhgef40	346.679447995896	0.59307802001432	0.10594383896709	5.59804162088699	2.16786713908191e-08	1.82796260238134e-07
ENSMUSG00000004565	50767	Pnpla6	174.333234403506	0.249277789181061	0.122453983560706	2.03568542184243	0.0417819538902489	0.0900860541714009
ENSMUSG00000004567	94178	Mcoln1	411.7715250273	-0.126835751914008	0.0960846062724541	-1.32004237551182	0.186820870297462	0.304669773009502
ENSMUSG00000004568	102098	Arhgef18	198.179831869624	-0.470064667074802	0.138534145421133	-3.39313218157042	0.000690982866071112	0.00242958111311952
ENSMUSG00000004591	109333	Pkn2	534.03144279925	-0.9583640938115	0.143123759203061	-6.69605171879109	2.14125967474552e-11	2.92425973340992e-10
ENSMUSG00000004609	12489	Cd33	107.728271634258	1.55300453856324	0.198131362647331	7.83825699178959	4.56843297915906e-15	1.0637996252487e-13
ENSMUSG00000004610	110826	Etfb	72.6431610891052	-0.369102636789841	0.21292319926079	-1.73350127215476	0.0830066115839007	0.159346208811761
ENSMUSG00000004612	72310	Nkg7	7.43845363156454	4.85577934304838	1.18853640543749	4.08551166025158	4.39797917118958e-05	0.000200428029101891
ENSMUSG00000004626	20911	Stxbp2	119.561172788318	1.80491770274061	0.213415062347379	8.45731169528567	2.73611864605768e-17	8.68812527857575e-16
ENSMUSG00000004630	18545	Pcp2	0.0500487832089931	-0.873495337950308	4.32794324778021	-0.201826892808338	0.840052056737723	NA
ENSMUSG00000004631	20392	Sgce	195.400847038585	0.474467056886728	0.14783635147102	3.20940724095004	0.00133008955900565	0.00436745663639646
ENSMUSG00000004633	69993	Chn2	19.8284874080606	1.43607677057778	0.342039073308042	4.19857519987034	2.68599657221771e-05	0.000128131984630237
ENSMUSG00000004637	80707	Wwox	119.596796810864	-0.488445575597976	0.173410174517716	-2.81670655690434	0.0048518832838405	0.0138968187231946
ENSMUSG00000004642	20492	Slbp	108.590804961107	0.833408885399365	0.1999367324923	4.16836303669942	3.06795021833554e-05	0.000144578820259453
ENSMUSG00000004651	22173	Tyr	0	NA	NA	NA	NA	NA
ENSMUSG00000004654	14602	Ghrhr	0.135065988129803	0	4.32794324777868	0	1	NA
ENSMUSG00000004655	11826	Aqp1	4004.26622821908	-1.08031381395	0.175108839391603	-6.16938481063226	6.85561981195662e-10	7.3430672081498e-09
ENSMUSG00000004661	56380	Arid3b	46.9234782672365	-0.539171854426047	0.256014188703321	-2.10602333080398	0.0352023257872326	0.0782240165865096
ENSMUSG00000004665	12798	Cnn2	368.759387075219	1.05589852298481	0.13353508808738	7.90727394655906	2.63086264166771e-15	6.27509459716298e-14
ENSMUSG00000004667	66420	Polr2e	561.16317077449	0.349191491428924	0.101128707127293	3.45294131951463	0.000554509613524058	0.0019995335285221
ENSMUSG00000004668	268379	Abca13	0.0650420713777673	0.569152411104117	4.32794324778021	0.131506440477479	0.895374692057978	NA
ENSMUSG00000004677	17925	Myo9b	344.599368408602	1.10834683144548	0.177968140145211	6.22778229036465	4.73083830903875e-10	5.21911755207015e-09
ENSMUSG00000004698	79221	Hdac9	94.278244880129	-0.044532165687892	0.284752552731034	-0.15638899550079	0.875726410768607	0.922646721529624
ENSMUSG00000004707	17085	Ly9	82.2291883626401	5.61928023072299	0.495708235005795	11.3358621743641	8.71694096417599e-30	1.16648519084246e-27
ENSMUSG00000004709	18106	Cd244a	11.3807853559297	3.19485194232326	0.693262791465052	4.60842840789374	4.05724025952867e-06	2.2702038356874e-05
ENSMUSG00000004730	13733	Adgre1	490.483954985263	3.37585412063336	0.210433153771945	16.0424061518933	6.46021296780846e-58	1.13429567136222e-54
ENSMUSG00000004748	67900	Mtfp1	668.522207818307	-0.952175674920285	0.207219966733127	-4.59499965148903	4.32749991902543e-06	2.40769757913812e-05
ENSMUSG00000004768	19335	Rab23	104.706138654494	0.321475573656841	0.158698918393271	2.02569479938227	0.0427960699689438	0.0918784675403682
ENSMUSG00000004771	53869	Rab11a	558.249216228495	-0.129486687081395	0.0823117658946431	-1.57312488286467	0.115689904321681	0.208466638199605
ENSMUSG00000004788	217715	Eif2b2	491.147141928255	-0.226766736398511	0.118513660740648	-1.91342276477951	0.0556939523689646	0.114294061981639
ENSMUSG00000004789	78920	Dlst	3896.31164561969	-0.54512812466109	0.103414836303789	-5.27127580669114	1.35478703921041e-07	1.00289900512743e-06
ENSMUSG00000004791	18654	Pgf	26.9743931607137	-0.337789458981082	0.398042278261255	-0.848627086691967	0.396088829853403	0.539677863070279
ENSMUSG00000004798	29869	Ulk2	1349.57783064581	-1.08123276072071	0.119929070427123	-9.01560194596641	1.95792225775763e-19	8.00572656505343e-18
ENSMUSG00000004814	56221	Ccl24	41.6324901816651	0.434527241555254	0.390705966883682	1.11215921533294	0.266069700191553	0.400933341733513
ENSMUSG00000004815	110524	Dgkq	52.960341034836	-0.387238983751231	0.269992988595798	-1.4342557033248	0.151499306217828	0.258623070124006
ENSMUSG00000004821	67366	Tmed11	0	NA	NA	NA	NA	NA
ENSMUSG00000004837	71520	Grap	89.8567737655868	0.491891234227485	0.192775004140984	2.55163389267909	0.0107219118055859	0.0279920735493912
ENSMUSG00000004842	18736	Pou1f1	0.327365310261788	1.83351336614652	2.56096563970422	0.715946101626839	0.474024630365899	NA
ENSMUSG00000004843	68942	Chmp2b	498.108914628443	-0.0816360822751323	0.0898084504182559	-0.90900223637015	0.363348945328696	0.506520670048959
ENSMUSG00000004846	26433	Plod3	460.517673780647	0.944906865947052	0.138631022503463	6.81598425001481	9.36205533358629e-12	1.34635894148323e-10
ENSMUSG00000004849	11769	Ap1s1	373.588640007993	1.40647657199562	0.186188905214788	7.55402998032085	4.21992975674722e-14	8.54266330324625e-13
ENSMUSG00000004864	26415	Mapk13	1.7176800084363	2.73194265797876	1.38087377825869	1.9784159138888	0.0478818059143331	0.100956441199363
ENSMUSG00000004865	20815	Srpk1	312.271187952187	-0.0470068289247961	0.153286180317053	-0.306660579757213	0.759101737713907	0.842864768016071
ENSMUSG00000004872	18505	Pax3	11.4327126572531	-0.86455400291088	0.421255851675072	-2.05232520681455	0.0401380678751956	0.0870608675688907
ENSMUSG00000004880	98386	Lbr	243.909839611405	-0.283085810507943	0.191762355528476	-1.47623244263865	0.139881503006742	0.242377294949309
ENSMUSG00000004885	12904	Crabp2	6.03529366725565	2.44591929791009	0.784816473114273	3.11654938664106	0.00182981028570003	0.00580312871155835
ENSMUSG00000004891	18008	Nes	1148.87839592779	0.881909980442543	0.175238554059289	5.03262529856393	4.83808185311052e-07	3.20074448888929e-06
ENSMUSG00000004892	12032	Bcan	2.31039577822484	2.02555536003482	1.26490682924709	1.60134747730036	0.109299978881704	0.199491095987438
ENSMUSG00000004894	73940	Hapln2	1.78967137654494	-3.78972424637676	1.33378465238054	-2.84133142453909	0.00449255965775396	0.0129688553745478
ENSMUSG00000004895	94315	Prcc	687.483166708495	-0.348289427660076	0.0823579056588664	-4.22897382921223	2.34759649897099e-05	0.000113380053083652
ENSMUSG00000004896	229503	Rrnad1	134.754343641925	-0.0651221888100299	0.17194053410457	-0.378748322198559	0.704874766052039	0.803565429995412
ENSMUSG00000004897	15191	Hdgf	3543.17522735577	-0.336336219079757	0.0644442294272766	-5.21902770921176	1.7986485518385e-07	1.29196756208741e-06
ENSMUSG00000004902	71803	Slc25a18	2.8038968463994	0.0372112817040878	0.800107030482338	0.0465078799290831	0.962905453608939	0.976814857404138
ENSMUSG00000004929	50492	Thop1	474.361294848819	-0.101652174580539	0.12320750290227	-0.825048574039936	0.40934401415645	0.552838419538379
ENSMUSG00000004931	57267	Apba3	798.400464944482	-0.887711300132035	0.138134388441419	-6.42643233265917	1.30633532324431e-10	1.58545102128497e-09
ENSMUSG00000004933	17179	Matk	47.3174806627113	3.45019889677795	0.408837397172012	8.43904916879788	3.19929499942181e-17	1.00504681933056e-15
ENSMUSG00000004934	59004	Pias4	336.95922690408	-0.097125721876982	0.110254350812952	-0.880924164541655	0.378358867391558	0.522007065622631
ENSMUSG00000004936	26395	Map2k1	809.865321115625	-0.311577735881318	0.0680865637253555	-4.57620004349384	4.73497800299726e-06	2.61464165824672e-05
ENSMUSG00000004937	52551	Sgta	1261.51587779591	-0.215126432689086	0.0826818343645922	-2.60185848974357	0.00927201024208158	0.0246838376267688
ENSMUSG00000004939	69564	Nmrk2	2028.84219999778	-0.172443478932685	0.207099610716563	-0.832659599581246	0.405036735646852	0.548783500868529
ENSMUSG00000004945	70544	Tmem242	879.139408735106	-0.419979048593498	0.133973735766889	-3.13478642802236	0.00171979269314306	0.0054896976177652
ENSMUSG00000004947	74198	Dtx2	158.917887928205	0.203723823243801	0.150388364934804	1.35465149403093	0.175528618918266	0.290359108899312
ENSMUSG00000004948	22788	Zp3	0.0863470620321057	-0.873502093827236	4.32794324778021	-0.201828453798523	0.840050836358321	NA
ENSMUSG00000004951	15507	Hspb1	3512.32658146695	0.161258181228647	0.262052217908434	0.615366595695038	0.538312646540268	0.669550710896679
ENSMUSG00000004952	54153	Rasa4	567.064500931376	0.337962272735923	0.137972676683581	2.44948696263237	0.0143059888754428	0.0359183502369793
ENSMUSG00000004961	53420	Syt5	0.664829907433768	1.96208984606914	2.02906484203194	0.966992185476077	0.333547940203037	NA
ENSMUSG00000004980	53379	Hnrnpa2b1	5275.57615617951	-0.147750250637777	0.0874453569120588	-1.68962945381268	0.0910988673649702	0.171904171656195
ENSMUSG00000004988	108017	Fxyd4	1.52830594927882	2.15713932785927	1.37049574733763	1.57398469280171	0.115490988302985	0.208227321692731
ENSMUSG00000004994	67736	Ccdc130	68.6338757070109	0.305842923622474	0.177482579664321	1.72322784692969	0.0848473298307238	0.162216696646401
ENSMUSG00000004996	67873	Mri1	221.561215891104	-0.14770114981729	0.127529434789506	-1.15817301363468	0.246793438763058	0.378867639006936
ENSMUSG00000005034	18749	Prkacb	675.707165663902	-0.379035113909052	0.093718546545022	-4.0443981248361	5.24577122155517e-05	0.000235163918498606
ENSMUSG00000005043	27029	Sgsh	75.0446085558955	0.301552337050626	0.192448935850087	1.56692130158375	0.117133087901502	0.21063513747593
ENSMUSG00000005045	269610	Chd5	5.82799761719794	-0.108334005367518	0.62718316980395	-0.172731046659593	0.862862838876811	0.915067130113777
ENSMUSG00000005054	13014	Cstb	297.286777248528	2.62481407372754	0.201182550995148	13.0469270855942	6.61626267507196e-39	2.27246568679805e-36
ENSMUSG00000005057	23921	Sh2b2	98.727759136623	0.801356909724604	0.299470550604262	2.67591223279769	0.00745261587188099	0.0203718673415206
ENSMUSG00000005069	19305	Pex5	463.956402922872	-0.106366408533979	0.104150444058737	-1.02127657251267	0.30712342264295	0.445686887812542
ENSMUSG00000005078	104771	Jkamp	169.143280875054	0.395604326497499	0.134093734213275	2.95020739647905	0.00317560681591686	0.00948722894497167
ENSMUSG00000005087	12505	Cd44	582.946531969016	2.95006302955241	0.268706236414096	10.9787665106743	4.8348015108714e-28	5.35675212559343e-26
ENSMUSG00000005089	20511	Slc1a2	2.10631343186833	1.29021987981539	1.22346971801459	1.0545580824911	0.291627483331522	0.42906112490155
ENSMUSG00000005102	27103	Eif2ak4	84.5882999094522	0.158768016347026	0.197256743404456	0.804880044184281	0.420888905190789	0.56344540458437
ENSMUSG00000005103	22388	Wdr1	1139.64761777105	0.74179722132833	0.112221805792156	6.6100987779701	3.84063670416527e-11	5.0470793755012e-10
ENSMUSG00000005107	117591	Slc2a9	16.7695764232795	1.30353328273456	0.390766990155177	3.33583264598915	0.000850443423694973	0.00292488953196028
ENSMUSG00000005124	22402	Ccn4	67.2142245767573	2.0297445721813	0.312271688818724	6.4999314534709	8.0356617599515e-11	1.00913417153614e-09
ENSMUSG00000005125	17988	Ndrg1	280.930029880175	-0.509378067376469	0.148357152294011	-3.4334581076819	0.000595934285469764	0.00212731920231438
ENSMUSG00000005131	75311	4930550C14Rik	3.51438807386456	1.15828999986214	0.765500603472038	1.51311441768766	0.130250597966335	0.22912542235512
ENSMUSG00000005142	17159	Man2b1	699.153638372419	1.68089695397054	0.183687634372728	9.15084436527594	5.64902622795672e-20	2.45601545370743e-18
ENSMUSG00000005148	12224	Klf5	128.540079076074	1.39664468339312	0.195527025590079	7.14297514207153	9.13321480527699e-13	1.52897880346993e-11
ENSMUSG00000005150	67836	Wdr83	269.026679456798	0.147459541850671	0.163495983776154	0.901915377031899	0.367101822219861	0.510130435084753
ENSMUSG00000005161	21672	Prdx2	1334.96580376443	0.383150559076356	0.159318432554981	2.40493553025718	0.0161753190655536	0.0399689418828452
ENSMUSG00000005198	20020	Polr2a	854.980488356757	-0.189998654330746	0.123819097956369	-1.53448585449797	0.124910170609761	0.221890250489265
ENSMUSG00000005202	20415	Shbg	3.51028971989319	-0.0339016354889934	0.693885697903929	-0.0488576657386117	0.961032726391406	0.975426439255515
ENSMUSG00000005204	80886	Senp3	422.409436442112	0.0760975858534753	0.088667888851282	0.858231619578873	0.39076457943306	0.534452870212774
ENSMUSG00000005220	53419	Corin	2.10860893920229	-1.42106582895853	0.993614010188036	-1.43019906562066	0.152659893560183	0.260130237017386
ENSMUSG00000005225	231999	Plekha8	71.6238589326188	-0.0013428944519311	0.210036628804515	-0.00639362029172993	0.994898663837343	0.996978928488206
ENSMUSG00000005232	14378	G6pc2	0	NA	NA	NA	NA	NA
ENSMUSG00000005233	66442	Spc25	22.5133243841412	3.13938259899823	0.607300496167618	5.16940562177927	2.34839693615499e-07	1.64443642746456e-06
ENSMUSG00000005237	327954	Dnah2	5.51080898943965	0.9076428447075	0.598638117361744	1.51617950542069	0.129473968843526	0.228207282751231
ENSMUSG00000005251	72388	Ripk4	0.358819169345583	0.604296964856202	2.13940187769223	0.282460706030629	0.777590272384386	NA
ENSMUSG00000005262	22230	Ufd1	520.247338887423	-0.130915679498018	0.083206213815019	-1.57338825426025	0.115628945064687	0.208403122257572
ENSMUSG00000005267	170740	Zfp287	20.8688170296682	0.139968906621469	0.285885792465744	0.489597280838085	0.624418900988875	0.741388023263286
ENSMUSG00000005268	19116	Prlr	7.17541665880769	1.71626036835209	0.623909924475609	2.75081434198148	0.00594473250361884	0.016681572058328
ENSMUSG00000005299	56384	Letm1	1116.53619154241	-0.603460489383094	0.114926873411455	-5.25082142644408	1.51422423723452e-07	1.10695754100493e-06
ENSMUSG00000005312	56085	Ubqln1	1027.20160541419	-0.276594224164425	0.11540344591383	-2.39675879670833	0.0165408081433935	0.0407450363637404
ENSMUSG00000005320	14186	Fgfr4	102.635637618178	1.56058313079171	0.30140804943736	5.17764251387732	2.24707280537635e-07	1.58154632422117e-06
ENSMUSG00000005338	94332	Cadm3	208.160982456788	-0.201416675743762	0.186768829967135	-1.07842767863998	0.280842940407426	0.418028986342812
ENSMUSG00000005339	14125	Fcer1a	4.12493201939241	0.984638011283972	0.666383494984499	1.47758463211469	0.139518990231673	0.241898649730298
ENSMUSG00000005354	56551	Txn2	2121.16289152073	-0.0204642961147051	0.130481678989893	-0.156836548035913	0.87537366810711	0.922416554295205
ENSMUSG00000005355	12365	Casp14	0.0650420713777673	0.569152411104117	4.32794324778021	0.131506440477479	0.895374692057978	NA
ENSMUSG00000005357	20513	Slc1a6	0.393727947447077	-1.98571935959182	2.53615181615535	-0.782965493998719	0.433647375338415	NA
ENSMUSG00000005360	20512	Slc1a3	62.5138320857671	-0.580118644477636	0.377284116845196	-1.53761745744432	0.124142176446014	0.220849719604725
ENSMUSG00000005362	58799	Crbn	253.493777499714	-0.551554030030532	0.12695595079438	-4.3444519660511	1.3962378917608e-05	7.0420143106722e-05
ENSMUSG00000005364	16192	Il5ra	0.881258720515959	-0.150035841847927	1.72257858634634	-0.0870995628513878	0.930592372860734	0.958148794590328
ENSMUSG00000005370	17688	Msh6	99.4914828485934	0.395798879344523	0.192496949687517	2.05613065550923	0.0397699240911632	0.0863971874028092
ENSMUSG00000005371	225055	Fbxo11	508.676280114323	-0.431384945628318	0.116280782156036	-3.70985589905516	0.000207377248608005	0.000822326407410768
ENSMUSG00000005373	58805	Mlxipl	993.803929332576	-0.698568736307488	0.151223613628158	-4.61944215951083	3.84773119963181e-06	2.16532071441869e-05
ENSMUSG00000005374	27368	Tbl2	176.722913738763	0.259039462908765	0.155338399058968	1.66758164419109	0.0953988046091869	0.178384771380648
ENSMUSG00000005378	66138	Bud23	259.408140022459	-0.149135155980593	0.119378765335634	-1.2492603316955	0.211569871737422	0.336111001909096
ENSMUSG00000005397	18073	Nid1	2480.70882134199	0.278783811427481	0.126770322868416	2.19912519838614	0.0278690212449745	0.0638424886923996
ENSMUSG00000005410	17218	Mcm5	84.989242105392	3.13208402738393	0.567691297182724	5.51723100728775	3.44382624740841e-08	2.81964129148162e-07
ENSMUSG00000005413	15368	Hmox1	313.028270736715	1.69806070799486	0.342631754177424	4.95593501563069	7.19832738386692e-07	4.62128133105076e-06
ENSMUSG00000005417	26936	Mprip	1473.28896131373	-0.395494153657615	0.111383015119493	-3.55075819444574	0.000384123155318259	0.00143692321379537
ENSMUSG00000005442	71722	Cic	622.397461757189	0.00902939282704888	0.181893789008926	0.0496410178502895	0.960408459390105	0.975268430625371
ENSMUSG00000005447	18476	Pafah1b3	23.2632513406512	2.60150600952589	0.379689714465308	6.85166310915063	7.29963033611848e-12	1.06992021313463e-10
ENSMUSG00000005465	50931	Il27ra	18.8180941329236	0.830690606896957	0.341730887109402	2.43083267633054	0.0150641695655602	0.0375338419063069
ENSMUSG00000005469	18747	Prkaca	1612.27945194308	-0.0853028476488101	0.0994023886308595	-0.858156919805927	0.390805820601755	0.534456589751209
ENSMUSG00000005470	66929	Asf1b	25.6677522196596	3.6142534467543	0.688152259699739	5.25211302558435	1.50364140352458e-07	1.10078302109536e-06
ENSMUSG00000005474	59310	Myl10	40.3432293082751	-1.77234785523589	0.436352504175432	-4.0617341215563	4.87095348788462e-05	0.000219882742652021
ENSMUSG00000005481	68278	Ddx39a	229.137504262629	0.95136764656136	0.21742802446473	4.37555208857489	1.21125512066751e-05	6.18319185700174e-05
ENSMUSG00000005483	81489	Dnajb1	201.214235012383	-0.663140206143207	0.278591719095344	-2.38032992616071	0.0172971435542166	0.0423650504356187
ENSMUSG00000005493	55993	Msh4	0.19635094481838	1.24860791416314	3.42515355523886	0.364540711540762	0.71545427865682	NA
ENSMUSG00000005501	227334	Usp40	179.267773925595	0.13699581195104	0.125882003900089	1.08828750501757	0.276468204847197	0.413068713513451
ENSMUSG00000005503	14028	Evx1	0	NA	NA	NA	NA	NA
ENSMUSG00000005505	67136	Kbtbd4	38.8399350914547	-0.400085920920646	0.269389379025623	-1.48515848088648	0.137501847500452	0.239024721492139
ENSMUSG00000005506	13046	Celf1	1164.1031618709	-0.32072137564752	0.143739402458627	-2.23126971562189	0.0256632684454222	0.0595170646098651
ENSMUSG00000005510	68349	Ndufs3	2869.46299051457	-0.352002594896663	0.138837356562098	-2.53535938462803	0.011233201664876	0.0291407124760531
ENSMUSG00000005514	18984	Por	455.162611117222	0.228431371636229	0.192903336274335	1.18417532868051	0.236343666123774	0.366913111975125
ENSMUSG00000005533	16001	Igf1r	268.303442822523	0.272506838444002	0.154756369286812	1.76087640011095	0.0782593251121767	0.151804233048921
ENSMUSG00000005534	16337	Insr	711.688645932891	-0.973789359736289	0.149357614210023	-6.51985079493149	7.03773625991392e-11	8.94717266158581e-10
ENSMUSG00000005540	14128	Fcer2a	1.80242275242161	-0.297124572405315	1.01633480891456	-0.292349105628531	0.770019716993834	0.850177676282289
ENSMUSG00000005547	13087	Cyp2a5	0	NA	NA	NA	NA	NA
ENSMUSG00000005553	11944	Atp4a	0.155528887091853	0.569138899350262	4.32794324778021	0.131503318497111	0.895377161591844	NA
ENSMUSG00000005566	21849	Trim28	821.1688238624	0.45100987376366	0.155592945021974	2.89865246589403	0.00374770046347096	0.0110253549109507
ENSMUSG00000005575	22192	Ube2m	1419.8364214326	-0.0288578153154133	0.0923826849935361	-0.312372554634372	0.754757405777913	0.839821322648289
ENSMUSG00000005580	11515	Adcy9	335.069417783312	-2.22843907025698	0.439983119740555	-5.06482855881159	4.08768055822399e-07	2.74036828054262e-06
ENSMUSG00000005583	17260	Mef2c	6785.03486168284	-0.515424639891242	0.109946175306671	-4.68797244154766	2.75925163908627e-06	1.60041254653222e-05
ENSMUSG00000005609	22083	Ctr9	277.952535826856	-0.20294709064132	0.127877474313965	-1.58704331415745	0.112502834948285	0.204063411833912
ENSMUSG00000005610	13690	Eif4g2	8364.03532985246	-0.423233947200898	0.0788367715834383	-5.3684840043578	7.94012317518808e-08	6.11015901397595e-07
ENSMUSG00000005611	17540	Irag1	86.6579212743782	-0.768903144090761	0.178933205535054	-4.29715178796217	1.73006731904617e-05	8.59735406580743e-05
ENSMUSG00000005615	13026	Pcyt1a	1271.79946210504	-1.09148005284168	0.157582751227449	-6.92639292270178	4.31706362089306e-12	6.56091792768173e-11
ENSMUSG00000005621	233410	Zfp592	312.044325377038	-0.765849892991926	0.199784052628373	-3.83338851583172	0.000126390095168463	0.000522811537782354
ENSMUSG00000005625	19185	Psmd4	1689.19783957684	-0.126340733549799	0.109103356124115	-1.15799126661214	0.246867600419742	0.378897480672108
ENSMUSG00000005628	50874	Tmod4	4086.2902565458	-0.480693019095085	0.132753505698392	-3.62094406898142	0.000293529971827386	0.0011291890347991
ENSMUSG00000005640	23920	Insrr	2.04789240873537	-1.48593926727826	0.911169423290784	-1.63080457848512	0.102931561064563	0.189868744219344
ENSMUSG00000005649	29865	Cabp5	0.312015952150088	1.98104278186884	3.63636900903803	0.544785960100595	0.585900735969084	NA
ENSMUSG00000005656	72183	Snx6	392.747741706412	0.575589080397958	0.135620677994183	4.24411003477395	2.19462651537888e-05	0.00010665127305104
ENSMUSG00000005667	17768	Mthfd2	128.612948608374	1.19123210911064	0.295251374372396	4.03463696534112	5.46867832724479e-05	0.000244465342663472
ENSMUSG00000005672	16590	Kit	47.8467397114453	0.767850582471308	0.29423206868214	2.60967672868052	0.00906278202889045	0.0241955968456244
ENSMUSG00000005674	641376	Tomm40l	176.636275824691	-0.376248895286509	0.125618590249745	-2.99516890404899	0.00274292908051554	0.00835693117848377
ENSMUSG00000005677	12355	Nr1i3	0.113726089166523	0.569145655227189	4.32794324778021	0.131504879487295	0.895375926824784	NA
ENSMUSG00000005681	11807	Apoa2	5.1507940875355	0.645957165906896	1.16640370961191	0.553802393274128	0.579714090227774	0.705155706021365
ENSMUSG00000005682	103135	Pan2	204.291025061623	0.0497827718950194	0.150166611545485	0.331516915662311	0.740254065862828	0.830151423785179
ENSMUSG00000005683	12974	Cs	9138.95267992219	-0.724816597483025	0.122782957722267	-5.9032345443457	3.56442956669036e-09	3.41337195680088e-08
ENSMUSG00000005686	11717	Ampd3	270.353088601144	0.567905146976291	0.229510843955725	2.47441531383957	0.0133454456145854	0.0338323217155094
ENSMUSG00000005687	68183	Bcas2	611.614521188995	0.11383051354817	0.120840985344118	0.941985976231623	0.346199819820798	0.488061697008278
ENSMUSG00000005696	20400	Sh2d1a	0.364199985855253	1.92861342839931	2.53195144058562	0.761710275120139	0.446232941408602	NA
ENSMUSG00000005698	13018	Ctcf	541.831918095571	-0.373277013775514	0.0961308469455126	-3.88300972722199	0.000103171439148827	0.000435509426050599
ENSMUSG00000005699	56513	Pard6a	69.4108781619954	-0.150939826649763	0.170253319677318	-0.88656025583431	0.375315699621536	0.518676632094998
ENSMUSG00000005705	11604	Agrp	3.06096377431636	-0.224514431886035	0.766443927864242	-0.292930015782971	0.769575645405851	0.849915053618638
ENSMUSG00000005716	19293	Pvalb	117672.400590131	-0.229877309978021	0.205714864836458	-1.11745599988981	0.263799402693646	0.398269457194919
ENSMUSG00000005718	83383	Tfap4	82.8530161399382	-0.220418341693627	0.201377489899575	-1.09455302975296	0.273712502896883	0.410152542580839
ENSMUSG00000005732	19385	Ranbp1	162.510023070244	1.30671095618353	0.282512586991791	4.62531942416251	3.74021539209005e-06	2.11347295860136e-05
ENSMUSG00000005763	12503	Cd247	22.7394436354876	0.637490062871082	0.386369397149718	1.64994967917725	0.0989532286048633	0.183893688971157
ENSMUSG00000005774	53970	Rfx5	53.1881164618906	-0.13514268102312	0.246482903097892	-0.548284198719646	0.583496775474421	0.708585830817729
ENSMUSG00000005779	19172	Psmb4	1657.2294724316	0.144709851179646	0.0938880636323321	1.54130190336371	0.123243325877784	0.219439991333107
ENSMUSG00000005800	17394	Mmp8	5.80008719831675	2.98385379417665	1.06362238697777	2.8053694908163	0.00502589298386243	0.0143573056018072
ENSMUSG00000005802	22785	Slc30a4	345.555571316118	-0.191622925153315	0.146789014313538	-1.30543096872367	0.191746138874516	0.31092174285357
ENSMUSG00000005803	59010	Sqor	429.65531192786	-0.646690751994102	0.131888275193134	-4.90332253604125	9.42290728632522e-07	5.9257636056329e-06
ENSMUSG00000005804	18457	Bloc1s6	278.110234727491	0.171539521780682	0.105092594222797	1.63227031409099	0.10262255401453	0.189434395658495
ENSMUSG00000005813	75624	Metap1	777.074494647335	-0.454639244022607	0.102718463976248	-4.42607128673319	9.59648220599033e-06	5.00162633538312e-05
ENSMUSG00000005823	78308	Gpr108	416.762795791969	0.161851974140276	0.10738259559923	1.50724587385032	0.131747645688101	0.231304777844639
ENSMUSG00000005824	50930	Tnfsf14	4.47343396352758	4.0494399096326	1.28904970497247	3.14141486865247	0.0016813368034812	0.00538027777113983
ENSMUSG00000005836	14465	Gata6	9.03711355174327	-0.237681156381512	0.606657894827594	-0.391787790792797	0.695215016897429	0.796076627672513
ENSMUSG00000005846	66409	Rsl1d1	671.964652193971	0.0537555771493389	0.0833605026081204	0.64485668233126	0.519020065491573	0.652782587267829
ENSMUSG00000005864	12789	Cnga2	0.56574378258444	0.361124110405065	1.74559229494233	0.206877695010103	0.836105376492496	NA
ENSMUSG00000005871	11789	Apc	410.712714618423	-0.564073800400955	0.105362081794283	-5.35366984777593	8.61880565576657e-08	6.60038450219389e-07
ENSMUSG00000005873	13476	Reep5	2183.48586097293	0.167736005368859	0.0772802627140079	2.17048958528521	0.0299697767587963	0.0679820758883075
ENSMUSG00000005881	66366	Ergic3	647.720444157776	0.735937261834561	0.156916642636922	4.68998857907884	2.73220298589614e-06	1.58650997839807e-05
ENSMUSG00000005882	56046	Uqcc1	1258.94295534587	-0.955397392264456	0.127534046954374	-7.491312438366	6.81882771091503e-14	1.34086260941352e-12
ENSMUSG00000005883	26972	Spo11	0.873003410378741	-2.53106386155376	1.62711291977357	-1.55555513744306	0.119813913698112	0.214408226249625
ENSMUSG00000005886	17978	Ncoa2	292.594354094123	-0.499504757961085	0.157935733343534	-3.16270895373999	0.00156308515949955	0.00504258906809123
ENSMUSG00000005891	19110	Prl4a1	0	NA	NA	NA	NA	NA
ENSMUSG00000005892	22044	Trh	0	NA	NA	NA	NA	NA
ENSMUSG00000005893	22026	Nr2c2	91.6657632797456	-0.677875459752249	0.288872056428079	-2.34662870522757	0.0189441221930554	0.0458377914940102
ENSMUSG00000005897	22025	Nr2c1	111.522223153745	-0.207648415655505	0.163398473560089	-1.27081000900013	0.203796247112863	0.326302001437486
ENSMUSG00000005899	77626	Smpd4	203.595141929124	-0.0931789267127798	0.118249213454125	-0.787987708255912	0.43070389572675	0.572604727639305
ENSMUSG00000005907	71382	Pex1	72.4024313101448	-0.207623852910274	0.174342169430868	-1.19089864252609	0.233693377526481	0.363715212149061
ENSMUSG00000005917	18423	Otx1	0.0362982788231126	0	4.32794324778021	0	1	NA
ENSMUSG00000005936	66989	Kctd20	591.135412962311	-0.276544566609957	0.110823480884981	-2.49536077013291	0.0125829124802611	0.0321603200289247
ENSMUSG00000005947	16407	Itgae	13.7470672200024	0.941004102246037	0.415295610180108	2.26586575725647	0.0234596037583148	0.0551637966968681
ENSMUSG00000005949	83429	Ctns	117.011616913775	0.338596709234239	0.149468988651939	2.26533083744022	0.0234923850420154	0.0552345774039765
ENSMUSG00000005950	94045	P2rx5	182.044393908359	-0.152230543076687	0.150115351962217	-1.01409043836505	0.310539600095117	0.449567971813148
ENSMUSG00000005951	74637	Shpk	22.9741444654993	-0.0251479533075258	0.280578662460416	-0.0896288872681959	0.92858212806638	0.956793023304657
ENSMUSG00000005952	193034	Trpv1	6.24614719437349	-0.690806448828412	0.546936338002478	-1.26304727045816	0.206572192181306	0.329700806817157
ENSMUSG00000005958	13845	Ephb3	86.4539227170046	1.82772305291603	0.28983958146763	6.3059815490389	2.86373152173215e-10	3.27865439999201e-09
ENSMUSG00000005968	22156	Tuft1	12.2275314621179	0.957096918458789	0.415875911762311	2.30140022874373	0.0213690190072693	0.0509278066036551
ENSMUSG00000005973	19672	Rcn1	315.056546785636	1.24661182792813	0.17340636125764	7.18896249760969	6.52855014122352e-13	1.11466745078984e-11
ENSMUSG00000005980	13419	Dnase1	11.4693867412383	-0.87361139481614	0.463314806255484	-1.88556761627516	0.0593532447329211	0.120317889775333
ENSMUSG00000005981	68015	Trap1	1453.49356612417	-0.497525960061159	0.0765354680714528	-6.50059341894498	8.0003788864825e-11	1.00585521482473e-09
ENSMUSG00000005982	74763	Naa60	263.486786611651	-0.729545718718043	0.11729933270579	-6.21952147458409	4.98673372626026e-10	5.45760003349822e-09
ENSMUSG00000005983	73261	1700037C18Rik	22.6095475316365	0.627483892506348	0.292246368702956	2.14710586581875	0.0317848544291836	0.0715324101863728
ENSMUSG00000005983	105246059	1700037C18Rik	22.6095475316365	0.627483892506348	0.292246368702956	2.14710586581875	0.0317848544291836	0.0715324101863728
ENSMUSG00000005986	68423	Ankrd13d	16.6415073927548	1.79384638292412	0.393926916074655	4.55375428721443	5.26969034839882e-06	2.8871170694934e-05
ENSMUSG00000005994	22178	Tyrp1	0.214876084783002	-0.873514893618069	4.04159896511182	-0.216131016748195	0.828885623166874	NA
ENSMUSG00000006005	108989	Tpr	933.918502996223	-0.333972788722159	0.144679605953037	-2.3083611993702	0.0209790551728914	0.0500969141370737
ENSMUSG00000006007	20028	Pdc	0.193117777394749	0	4.32794324777119	0	1	NA
ENSMUSG00000006010	226499	Odr4	339.711129233494	-0.284040343611999	0.0948475526481061	-2.99470398214509	0.00274711303150513	0.00836596798481717
ENSMUSG00000006014	96875	Prg4	977.710054700774	1.10609650454336	0.533482003844706	2.07335298392809	0.0381394410919095	0.0834548313890499
ENSMUSG00000006019	71723	Dhx34	116.7290621358	0.497284851928587	0.19506756450746	2.54929543609271	0.0107940815793095	0.0281397132430628
ENSMUSG00000006021	70394	Kptn	157.444624275926	-0.290690541039381	0.142074367787537	-2.0460449380573	0.0407519495690722	0.0881604216585598
ENSMUSG00000006024	108124	Napa	1916.0843893821	-0.01210113755117	0.154717317989477	-0.0782144992456052	0.937657428620202	0.961423215166843
ENSMUSG00000006050	24068	Sra1	717.653657660653	-0.218886020176741	0.124874412604798	-1.75284924758341	0.0796278872020376	0.154052900812954
ENSMUSG00000006056	76815	Calcoco2	0	NA	NA	NA	NA	NA
ENSMUSG00000006057	11951	Atp5g1	6460.01780502186	-0.669235636598688	0.159266721993983	-4.20198035232978	2.64590102972932e-05	0.000126394827122535
ENSMUSG00000006058	27681	Snf8	337.205039927334	0.115651443014557	0.128101203600817	0.90281308655729	0.366625104475285	0.509605433227214
ENSMUSG00000006095	66411	Tbcb	353.10319203665	0.470672371756925	0.110053908123449	4.27674382293597	1.89646825947325e-05	9.35209808356657e-05
ENSMUSG00000006127	19062	Inpp5k	409.895226595217	-0.0404958280053025	0.114304461386262	-0.354280379909735	0.723128770019336	0.817388378127958
ENSMUSG00000006134	12929	Crkl	506.909494674867	-0.479463042301138	0.112896697156926	-4.24691823919954	2.16731004455265e-05	0.000105414032093795
ENSMUSG00000006143	69665	Upk3bl	0	NA	NA	NA	NA	NA
ENSMUSG00000006154	67425	Eps8l1	36.5080505436808	-1.1470685001568	0.540131216111904	-2.12368488607988	0.0336965020397062	0.0753082652677872
ENSMUSG00000006169	216705	Clint1	753.801665884428	-0.114797851679928	0.11195775060018	-1.02536761469861	0.305189763034929	0.443630573225916
ENSMUSG00000006179	54373	Prss16	0.460748028660503	0.569167417785557	2.36292374525846	0.240874221577261	0.809652602166338	NA
ENSMUSG00000006191	68916	Cdkal1	190.594859802948	-0.950185654100767	0.141294954783195	-6.72483780867296	1.75788139741214e-11	2.42155212819982e-10
ENSMUSG00000006200	19202	Rhox6	0	NA	NA	NA	NA	NA
ENSMUSG00000006204	71395	Cdcp3	0.80876779068724	1.21928786787971	1.91334158567945	0.637255719002588	0.52395828921401	0.656759312746708
ENSMUSG00000006205	56213	Htra1	736.702640544816	0.238141496067374	0.142715032994165	1.66865039422378	0.095186685435605	0.178036595884639
ENSMUSG00000006215	22642	Zbtb17	491.384402975427	-0.606650865064725	0.0841658489567806	-7.20780307671158	5.68617794392991e-13	9.82236002250692e-12
ENSMUSG00000006216	56365	Clcnkb	0.867079631821713	3.14445634207701	1.58289183922469	1.98652634637196	0.0469749103854743	0.099379832997008
ENSMUSG00000006218	277743	Fam131c	1.08460347229551	-1.67592970134788	1.48616250826535	-1.1276893960298	0.259451117518224	0.393376149927572
ENSMUSG00000006219	74202	Fblim1	127.901466769258	1.93345912771673	0.225442670503896	8.57627849863194	9.79921106583223e-18	3.3051087012221e-16
ENSMUSG00000006221	29818	Hspb7	6312.08842025554	0.124125131495547	0.254510118578485	0.487702147909967	0.625760830141265	0.742496498592307
ENSMUSG00000006235	13857	Epor	14.4861602757521	1.73422799616015	0.471359127740542	3.67920741128566	0.000233959936908474	0.000917717458381363
ENSMUSG00000006241	67119	Ccdc159	10.8123464520618	0.626143060965043	0.470654488270975	1.3303667054473	0.183397478859974	0.30052920199955
ENSMUSG00000006262	68473	Mob1b	472.477261555659	-0.208104939931769	0.0824571711036095	-2.52379431826833	0.0116095832650806	0.0300000366052391
ENSMUSG00000006269	110935	Atp6v1b1	0.248503376208276	-0.152173474080901	3.86490983049935	-0.0393730981457956	0.968592927842485	NA
ENSMUSG00000006270	22326	Vax1	0.20346975691039	0.527382230387176	3.39777175363451	0.15521414286379	0.876652499016451	NA
ENSMUSG00000006273	11966	Atp6v1b2	1063.90853624757	0.592631812988873	0.104858096891612	5.65175060922053	1.58821913049303e-08	1.370030131486e-07
ENSMUSG00000006276	13859	Eps15l1	330.966270695242	0.00489278356017762	0.138830904502294	0.0352427550459183	0.97188616979463	0.98232528260963
ENSMUSG00000006281	21745	Tep1	308.704580377012	1.00402275525836	0.135239870977734	7.42401444189239	1.13622762809404e-13	2.16208485316362e-12
ENSMUSG00000006288	219022	Ttc5	129.74931556615	0.760295070310534	0.153357294038729	4.95767139786992	7.13430952943381e-07	4.58732763752175e-06
ENSMUSG00000006289	66246	Osgep	378.366156835103	-0.173309379918263	0.113005650090347	-1.53363464375191	0.125119560497851	0.222185601270117
ENSMUSG00000006299	227290	Aamp	788.848027757624	0.106269224279018	0.0918916575285026	1.15646215485944	0.247492170875322	0.379404400410691
ENSMUSG00000006301	69660	Tmbim1	895.832278501829	0.519705086687243	0.1561720960451	3.32777173290394	0.000875435659151747	0.00300582773472163
ENSMUSG00000006304	76709	Arpc2	1308.05151335504	1.02331544046665	0.125569287719804	8.14940865755393	3.65708143626191e-16	9.98213698522985e-15
ENSMUSG00000006307	75410	Kmt2b	377.406003293291	-0.142932701393532	0.14736954416632	-0.969893082061922	0.332099788704046	0.473100389655488
ENSMUSG00000006310	58206	Zbtb32	7.78874865586828	0.723877990892772	0.580659399936634	1.24664819164517	0.21252652307184	0.337344726755332
ENSMUSG00000006311	14008	Etv2	0	NA	NA	NA	NA	NA
ENSMUSG00000006313	109637	Upk1a	4.41982574193536	0.653819905102629	0.770455325834818	0.848614946485301	0.396095587350987	0.539677863070279
ENSMUSG00000006315	69804	Tmem147	993.377120978253	-0.477643704223202	0.111475789297491	-4.28473040857806	1.82960909604577e-05	9.04620543457563e-05
ENSMUSG00000006333	76846	Rps9	3364.33410773886	0.723538119880932	0.135644173946615	5.33408917485606	9.60253269504779e-08	7.29141465657866e-07
ENSMUSG00000006335	69714	Tfpt	143.982996940096	0.0703433513738456	0.147783518226045	0.47598915101108	0.634082107023862	0.749043476569735
ENSMUSG00000006342	71733	Susd2	74.829289231851	0.352499420691596	0.202817297302014	1.73801458445969	0.0822082439691127	0.15808038552911
ENSMUSG00000006344	23887	Ggt5	148.591648050614	0.908241103852269	0.190990383118803	4.75542846200435	1.98025975763012e-06	1.175379985174e-05
ENSMUSG00000006345	14598	Ggt1	0.259449478247917	0.669829908160585	3.24773816394486	0.206245046351574	0.836599502251511	NA
ENSMUSG00000006356	68337	Crip2	870.990465119029	0.950695703736527	0.168247366947571	5.65058295404279	1.59904616030825e-08	1.37821594611595e-07
ENSMUSG00000006360	12925	Crip1	800.655613518587	1.52915197361481	0.167888875179962	9.10811971296903	8.38220403270347e-20	3.56901778318085e-18
ENSMUSG00000006362	12398	Cbfa2t3	532.168457195481	-0.795021645777625	0.202546441020696	-3.92513263511942	8.66819634128524e-05	0.000372309691957495
ENSMUSG00000006369	14114	Fbln1	271.937484383688	0.454308991375691	0.194044740449907	2.34125898142018	0.0192188303893516	0.046445028913833
ENSMUSG00000006373	53328	Pgrmc1	309.310067702235	0.721191119629541	0.126143868970817	5.71721103461943	1.08286601626224e-08	9.59815176908917e-08
ENSMUSG00000006378	26912	Gcat	8.10750008494379	-0.44630936042059	0.473195139573911	-0.943182469757549	0.345587578433478	0.487465353617872
ENSMUSG00000006386	21687	Tek	443.375078507281	-0.417351074317123	0.152265301735192	-2.74094668687517	0.00612624469227147	0.0171255630247328
ENSMUSG00000006389	17480	Mpl	0.396383815160691	-1.62156333943878	2.50725351024544	-0.646748855994238	0.51779449774095	NA
ENSMUSG00000006390	54325	Elovl1	233.429243508607	1.38538841214467	0.169055278549261	8.19488408781616	2.50834762825806e-16	6.97598217586264e-15
ENSMUSG00000006392	80509	Med8	313.286596128928	-0.160542310932341	0.103002093044849	-1.55863154025849	0.119083613519998	0.21345351895452
ENSMUSG00000006395	NA	Hyi	62.3779131718941	1.37037220195426	0.267911417651982	5.115019785138	3.13708072098616e-07	2.14637979741311e-06
ENSMUSG00000006398	107995	Cdc20	53.9772826105313	3.8531516734817	0.667314340295404	5.77411789438842	7.73572615759169e-09	7.00122286586076e-08
ENSMUSG00000006403	240913	Adamts4	119.331016986984	1.83597251728499	0.542322797843935	3.38538694036855	0.000710779829611485	0.00249365861910682
ENSMUSG00000006411	71740	Nectin4	12.3037900885809	3.67904608768932	0.649138251330728	5.66758480207769	1.44824382957689e-08	1.25876882496502e-07
ENSMUSG00000006412	18637	Pfdn2	708.606136320948	-0.153375431136488	0.126427060905309	-1.21315349766268	0.225071139489857	0.353068892639642
ENSMUSG00000006418	81018	Rnf114	655.573454868447	-0.653959516798707	0.0900460743904727	-7.26249890653644	3.8000358906638e-13	6.73354597031811e-12
ENSMUSG00000006423	77644	Steep1	203.396356151733	-0.329578905988527	0.127225487199277	-2.59051007187183	0.00958338171871615	0.0254044675147032
ENSMUSG00000006435	18011	Neurl1a	2688.72328321856	-0.786242376004997	0.142389537674099	-5.52177069220176	3.35600289088821e-08	2.75210933447768e-07
ENSMUSG00000006442	20810	Srm	188.731586499215	1.16056775785985	0.291822525252126	3.97696427600011	6.98006463290644e-05	0.000305923377190421
ENSMUSG00000006445	13836	Epha2	93.8577349530363	0.24378159754339	0.339998675329597	0.717007492182333	0.473369473762344	0.611956471695275
ENSMUSG00000006456	56275	Rbm14	107.546046450629	0.619543354916684	0.252185639085519	2.45669561979534	0.0140221436705219	0.035334841863795
ENSMUSG00000006457	11474	Actn3	91138.2541296237	-0.930129011653144	0.175546484840339	-5.29847699598831	1.16772585170615e-07	8.71586177180745e-07
ENSMUSG00000006462	NA	A530013C23Rik	41.3566834373983	-0.394865117985841	0.282412497718618	-1.39818570769933	0.162057307521635	0.272604439915587
ENSMUSG00000006463	70605	Zdhhc24	68.1827129113311	0.983133616940636	0.210750577926763	4.66491540195103	3.08744031564372e-06	1.77389802233257e-05
ENSMUSG00000006464	52028	Bbs1	47.6998851955529	0.0126941540991373	0.21700732401176	0.058496431661677	0.953353204751041	0.970900800489757
ENSMUSG00000006469	142681	Slc34a3	0	NA	NA	NA	NA	NA
ENSMUSG00000006471	78797	Ndor1	28.1847229682789	-0.0145777785918992	0.280589349787099	-0.0519541408216678	0.958565234352658	0.973924584604821
ENSMUSG00000006476	56876	Nsmf	260.239678431747	0.615052932433494	0.133380536410202	4.61126449920657	4.00226899226078e-06	2.24187984214488e-05
ENSMUSG00000006488	19113	Prl7a1	0	NA	NA	NA	NA	NA
ENSMUSG00000006490	67310	Prl8a9	0	NA	NA	NA	NA	NA
ENSMUSG00000006494	228026	Pdk1	750.875480313798	-1.04451423720962	0.159302346011945	-6.55680385982074	5.49732411585699e-11	7.0805534612238e-10
ENSMUSG00000006498	19205	Ptbp1	361.882575887912	1.0423828174647	0.214111581761993	4.86840930736486	1.12500131233278e-06	6.96907864618567e-06
ENSMUSG00000006517	192156	Mvd	131.124407263233	0.501138032961428	0.220840273618354	2.2692329834162	0.023254161478639	0.0547744610528967
ENSMUSG00000006519	13057	Cyba	512.795206595644	3.28953101054163	0.218986633397134	15.0216063853361	5.30073765939076e-51	4.96534553112385e-48
ENSMUSG00000006522	16426	Itih3	1.4643781178589	0.54734588663003	1.00859088599406	0.542683752382482	0.587347562860228	0.711668542769496
ENSMUSG00000006526	69179	Stimate	176.208479743385	-0.348401324902357	0.128192269361845	-2.71780292709332	0.00657169675060774	0.0182298460945651
ENSMUSG00000006527	54650	Sfmbt1	166.303271871131	0.204125140531373	0.145862759271568	1.39943287478424	0.161683214338582	0.272099541985114
ENSMUSG00000006529	16424	Itih1	0.328554063460957	-0.873516997551716	4.32794324776643	-0.201831897403581	0.840048144155254	NA
ENSMUSG00000006538	16147	Ihh	1.57639540816156	1.33268466551412	1.24518983988266	1.07026625405143	0.284499479544113	0.421917478011304
ENSMUSG00000006542	241113	Prkag3	1877.24198739727	-0.159402642233461	0.250028180812581	-0.637538703498976	0.52377400795797	0.656759312746708
ENSMUSG00000006546	12958	Cryba2	0	NA	NA	NA	NA	NA
ENSMUSG00000006567	11979	Atp7b	0.618462636188429	-0.152170573031122	1.99007421197806	-0.0764647730799294	0.939049338905792	NA
ENSMUSG00000006570	13215	Defb2	0	NA	NA	NA	NA	NA
ENSMUSG00000006574	20533	Slc4a1	6.90067527048475	-0.77632927733307	0.788573112612144	-0.984473430448933	0.324882789017109	0.465654786205632
ENSMUSG00000006575	51799	Rundc3a	17.3633189673113	1.51856222184886	0.360078295837069	4.21731117761118	2.47232692080009e-05	0.000118791590542896
ENSMUSG00000006576	20536	Slc4a3	199.552747918239	1.01603831993195	0.20391515728113	4.98265226322132	6.27186024543735e-07	4.06703889043338e-06
ENSMUSG00000006585	67177	Cdt1	46.7974084421668	3.08124241828966	0.460584285657744	6.68985572073837	2.23390732449791e-11	3.04473294598234e-10
ENSMUSG00000006586	12395	Runx1t1	43.7048251653123	0.602410858363162	0.282299426725477	2.13394290364244	0.0328474548962378	0.0736343250844848
ENSMUSG00000006587	30927	Snai3	108.921061507536	0.0161213013601543	0.204137609574924	0.0789727154820897	0.937054325156649	0.961071792804868
ENSMUSG00000006589	11821	Aprt	316.122080465049	1.03056701029786	0.20254007565172	5.08821282396472	3.61453607052956e-07	2.44866401517006e-06
ENSMUSG00000006599	14884	Gtf2h1	347.055708377384	-0.0941355013553859	0.102113481444609	-0.921871431897549	0.356595642163313	0.499129942736524
ENSMUSG00000006611	15216	Hfe	404.002145934791	0.530504596043308	0.115355369092608	4.59887216534687	4.24784324829458e-06	2.36721345756773e-05
ENSMUSG00000006638	57742	Abhd1	1.54613987008711	-0.837704213509255	1.34969011834862	-0.620664108094833	0.534820649505221	0.666560867553892
ENSMUSG00000006641	330064	Slc5a6	84.4784891047802	-0.146465303096106	0.181955897491668	-0.804949469158108	0.42084883985883	0.563445124401841
ENSMUSG00000006642	69852	Tcf23	3.8795461176542	0.511211379832842	0.715840878010682	0.714141082936609	0.475139944230268	0.613667834714049
ENSMUSG00000006649	54631	Nphs1	0	NA	NA	NA	NA	NA
ENSMUSG00000006651	11803	Aplp1	28.9596185768439	0.155142500413713	0.29839342077029	0.519926009136594	0.603115146609811	0.724047357645054
ENSMUSG00000006673	69232	Qrich1	516.544066913514	-0.0458518054504524	0.0967994293341931	-0.473678468621466	0.635729209697826	0.750349802603254
ENSMUSG00000006675	74443	P4htm	37.7210357799821	-0.193676367827671	0.232482113133477	-0.833080727016936	0.404799202358267	0.548533795515464
ENSMUSG00000006676	71472	Usp19	2295.54365154793	-0.397027955907777	0.0648308721245175	-6.12405699471734	9.1222241431372e-10	9.55237780191928e-09
ENSMUSG00000006678	18968	Pola1	37.8048113432537	1.5415447275247	0.399863859378071	3.85517393325405	0.000115647377156288	0.000483028201953137
ENSMUSG00000006699	12540	Cdc42	3112.10599956419	0.452451048455809	0.0704549503926608	6.42184893941733	1.34628988994061e-10	1.62818908755259e-09
ENSMUSG00000006705	18771	Pknox1	175.9746866989	-0.212075242166554	0.156041697450915	-1.35909340664065	0.174116991879631	0.288487133675465
ENSMUSG00000006711	210108	D130043K22Rik	0.89901906248985	-0.679620470934086	1.58696687213717	-0.428251202256567	0.668468242016695	0.776486581512426
ENSMUSG00000006715	57441	Gmnn	76.3462142430002	-0.126936511318472	0.277881654713857	-0.456800616971935	0.647814362285062	0.760173008653374
ENSMUSG00000006717	66834	Acot13	816.18090511604	-0.710199983214095	0.171531819350432	-4.14033959357236	3.46792041218952e-05	0.000161653254590368
ENSMUSG00000006720	193452	Zfp184	3.28826791331002	0.335106921131482	0.827023105487131	0.405196564531409	0.685333030074317	0.788548985889151
ENSMUSG00000006724	13115	Cyp27b1	1.54443057047605	-1.48368155409919	1.21459968457083	-1.22153955162885	0.221881799923131	0.349102163140623
ENSMUSG00000006728	12567	Cdk4	512.515700118634	1.17056833398114	0.192902160938405	6.06819710202679	1.29354096891585e-09	1.32294254528129e-08
ENSMUSG00000006731	14421	B4galnt1	79.3709688756809	3.21441375941687	0.29344546602856	10.9540413178646	6.35476632095444e-28	6.96590555011857e-26
ENSMUSG00000006732	17299	Mettl1	199.74447824947	0.368947478264012	0.13343067281677	2.76508744560299	0.00569075382114566	0.0160452941231591
ENSMUSG00000006736	67125	Tspan31	256.328606258664	0.44013849902619	0.134084079973443	3.28255598362882	0.00102870556906324	0.00347990222706095
ENSMUSG00000006740	16573	Kif5b	1929.4823864317	-0.193921680650078	0.0759995984406555	-2.5516145430887	0.0107225072107383	0.0279920735493912
ENSMUSG00000006763	78935	Saal1	64.6266961747074	0.579281131847083	0.188715255814088	3.06960414698936	0.00214342658840977	0.00668458461470167
ENSMUSG00000006764	216343	Tph2	1.33457290661968	0.515527002275904	1.26639027249792	0.407083829899485	0.683946419297461	0.787681223252603
ENSMUSG00000006777	94179	Krt23	0.0486840177887557	0	4.32794324778021	0	1	NA
ENSMUSG00000006782	12799	Cnp	240.914812981859	0.184061154404711	0.130928464558962	1.40581465630662	0.159779168770426	0.269600132895098
ENSMUSG00000006784	74407	Odad4	9.69268352370851	-0.746926557111997	0.544624714229854	-1.37145182287259	0.170234152067251	0.283244831426925
ENSMUSG00000006800	72043	Sulf2	446.647998051787	1.16589732234835	0.136981417727902	8.51135388789941	1.71914066591216e-17	5.61458808924212e-16
ENSMUSG00000006818	20656	Sod2	3140.23667609956	-0.922721594904706	0.132943201305687	-6.94072044183001	3.90105319042194e-12	5.97272690551378e-11
ENSMUSG00000006850	71983	Tmco6	110.333284234907	-0.0454930400601183	0.166996691100417	-0.2724188111773	0.78530001023795	0.86033656361663
ENSMUSG00000006906	70527	Stambp	115.001213308064	0.224866308023111	0.138263085801115	1.62636546638754	0.103871932624559	0.191278061614414
ENSMUSG00000006920	14055	Ezh1	460.476652855638	-0.318605317074253	0.108747942322663	-2.92975949953084	0.00339224438799179	0.0100760121573558
ENSMUSG00000006930	15114	Hap1	8.50066964303264	1.63550788955224	0.564002538433645	2.89982363216732	0.00373372680828823	0.0109889520230225
ENSMUSG00000006931	66180	P3h4	130.539357697973	0.995422868634398	0.156704102715109	6.35224510007945	2.12194862118812e-10	2.48460893099118e-09
ENSMUSG00000006932	12387	Ctnnb1	2033.23585967344	-0.207266012496411	0.0984677950082632	-2.10491168690248	0.0352989961916317	0.0783639596402235
ENSMUSG00000006941	68969	Eif1b	389.999357164009	0.0691781963899672	0.103735957371484	0.666868057545722	0.504856415902549	0.640329949465763
ENSMUSG00000006948	56640	Klk4	0	NA	NA	NA	NA	NA
ENSMUSG00000006958	12667	Chrd	71.9468116832326	-0.00321620542720245	0.189674575841326	-0.0169564392746712	0.986471367193617	0.99224921588862
ENSMUSG00000006998	21762	Psmd2	3236.16422091953	-0.317572910202448	0.12757433086655	-2.48931668342158	0.0127988903798505	0.0326349926667222
ENSMUSG00000007021	20974	Syngr3	1.00543337278728	1.93501428287045	1.62227162618871	1.19278069814763	0.232955271350819	0.362730807102205
ENSMUSG00000007029	22321	Vars	701.19206529523	0.141852716051936	0.184154749339999	0.770290837246005	0.441127390400493	0.582106247126423
ENSMUSG00000007030	27762	Vwa7	159.763701538678	-1.41170432995656	0.213637242777249	-6.60795052213106	3.89676868620352e-11	5.11168740199123e-10
ENSMUSG00000007033	15482	Hspa1l	52.8935188956275	-0.900512927846753	0.246588463898935	-3.65188587336279	0.000260321576697473	0.001012399896694
ENSMUSG00000007034	70129	Slc44a4	5.68791097358285	2.23839263832682	0.770790272532077	2.9040229464412	0.00368401158278055	0.0108581394018795
ENSMUSG00000007035	17687	Msh5	9.44174504570475	0.318172395760474	0.484957537583528	0.656082999237172	0.511770722399023	0.646547306525046
ENSMUSG00000007036	193742	Abhd16a	915.535388041983	-0.782275726704752	0.113180961194891	-6.91172542136056	4.78793936007953e-12	7.2285607569611e-11
ENSMUSG00000007038	18010	Neu1	257.355295108562	0.335382919281654	0.140856351310747	2.38102802011218	0.0172643986861278	0.0422999320085271
ENSMUSG00000007039	51793	Ddah2	245.316914869627	1.23221047979433	0.178485542745811	6.9036990942688	5.06655630048576e-12	7.6157251816492e-11
ENSMUSG00000007041	114584	Clic1	557.880582127063	2.34348253952152	0.222433236709506	10.5356671250622	5.91622897240014e-26	5.32408937393982e-24
ENSMUSG00000007050	27756	Lsm2	142.613066223176	0.411978352263935	0.18838572687082	2.18688729293401	0.028750752790398	0.0655850690175473
ENSMUSG00000007080	18973	Pole	34.0410175462563	1.0782316357697	0.434769344019917	2.48000842423772	0.0131379278696389	0.0333678108870493
ENSMUSG00000007097	98660	Atp1a2	18821.2426756077	-0.675239910078018	0.127017423779373	-5.316120339922	1.06003058218192e-07	7.97849168648831e-07
ENSMUSG00000007107	27222	Atp1a4	4.48547328035534	-0.203402581810189	0.638375361620305	-0.318625363757647	0.750010617647248	0.837054904331139
ENSMUSG00000007122	12372	Casq1	27356.7098338739	0.00175109196718013	0.182508602818584	0.00959457220173198	0.992344756424525	0.995630026309475
ENSMUSG00000007207	20907	Stx1a	29.5742820128679	1.09298609417666	0.274688740289596	3.97899853129896	6.9206168428127e-05	0.000303576142819677
ENSMUSG00000007209	26368	Ceacam9	0	NA	NA	NA	NA	NA
ENSMUSG00000007216	243372	Zfp775	95.0868435884246	-0.863879087096175	0.189858678780186	-4.55011639523918	5.36162488732301e-06	2.93005477798866e-05
ENSMUSG00000007279	56788	Scube2	45.5954619488445	0.0670476749683365	0.29337130254378	0.228542036616997	0.819224880189113	0.885135663451112
ENSMUSG00000007338	18120	Mrpl49	329.823440084929	-0.0583841551508798	0.153770328438465	-0.379684141562094	0.704179893388375	0.802951322024437
ENSMUSG00000007379	329727	Dennd2c	94.7000912662067	0.514616395716467	0.208435328402525	2.46894995997344	0.0135510166462893	0.0342901953642842
ENSMUSG00000007411	17169	Mark3	765.723298258723	-0.313697718124724	0.0903237001625493	-3.47303883211365	0.00051460089398045	0.00187068181745442
ENSMUSG00000007415	67210	Gatad1	891.719071244962	-0.585998788763401	0.0762145322101218	-7.68880647522463	1.48513902235488e-14	3.26287259836773e-13
ENSMUSG00000007440	12943	Pcdha10	0	NA	NA	NA	NA	NA
ENSMUSG00000007457	NA	2310003L06Rik	0	NA	NA	NA	NA	NA
ENSMUSG00000007458	17113	M6pr	606.222695822125	0.809362669813979	0.137466597540628	5.88770424447855	3.91597077938396e-09	3.7137747731958e-08
ENSMUSG00000007476	241296	Lrrc8a	102.348432968789	0.101026985193386	0.251382008538298	0.401886299583745	0.687767705986912	0.790712239050393
ENSMUSG00000007480	17203	Mc5r	20.1565042824042	-0.732468813571122	0.475042191845742	-1.54190264811041	0.123097252364624	0.219217782296074
ENSMUSG00000007564	51792	Ppp2r1a	1575.36512938028	-0.0704590645796881	0.0710369068237504	-0.991865605219889	0.321263089293467	0.461654678485446
ENSMUSG00000007570	72775	Fance	113.982945149883	0.209011206565803	0.13843291240701	1.50983753019141	0.131084886018465	0.230298152691264
ENSMUSG00000007589	28113	Tinf2	191.217187698633	-0.085323472787081	0.119692714551528	-0.712854354642857	0.475935886920035	0.614534016390625
ENSMUSG00000007591	71099	Tssk4	3.14724472826924	2.13992969943114	0.907508863591792	2.35802622462727	0.0183723949967714	0.0446804494208098
ENSMUSG00000007594	330790	Hapln4	2.51178998549853	-0.0979561471889684	0.951708048936494	-0.102926677249847	0.918021164756387	0.949727919844358
ENSMUSG00000007603	224907	Dus3l	369.099632200983	-0.0457601140339048	0.0980008950396782	-0.466935674570906	0.64054590074596	0.753876066394788
ENSMUSG00000007610	70359	Gtpbp3	173.984218211813	0.0615814786327573	0.118399360065568	0.520116650957016	0.602982273589703	0.724014373602318
ENSMUSG00000007613	21812	Tgfbr1	390.064930389542	0.296292645328013	0.142835428476266	2.07436382197885	0.0380455346047978	0.083302420010165
ENSMUSG00000007617	26556	Homer1	859.182079471115	-1.41300283463989	0.135962906897783	-10.3925612277633	2.68056494398756e-25	2.23648106743707e-23
ENSMUSG00000007646	114714	Rad51c	17.2274211375893	1.38415711442378	0.456277643426572	3.03358521804615	0.00241666445956339	0.00744767776023363
ENSMUSG00000007653	14401	Gabrb2	0.781567253502495	-0.152170021653521	1.80373067433279	-0.0843640482578194	0.93276699068474	0.959108978347028
ENSMUSG00000007655	12389	Cav1	2638.57774901473	0.115787030545823	0.112799516211033	1.02648516975197	0.304662950502673	0.44305229581251
ENSMUSG00000007656	59046	Arpp19	974.135188951598	0.149129303714826	0.110604390079704	1.34831269904712	0.177557829389904	0.293128832529343
ENSMUSG00000007659	12048	Bcl2l1	306.975366799413	0.524252209539453	0.339097334148042	1.54602279860619	0.122099061854128	0.21762821887994
ENSMUSG00000007670	16549	Khsrp	532.397738423092	0.198139568758938	0.152211917370053	1.30173492445554	0.193007016399692	0.312583704515529
ENSMUSG00000007682	13371	Dio2	93.9055696638496	1.56175516448352	0.218410349050843	7.15055477577192	8.64278855582272e-13	1.45195029434712e-11
ENSMUSG00000007721	234388	Ccdc124	1136.40173017071	-0.0596409998980616	0.129340150712857	-0.461117445505906	0.644714346091316	0.757570603503812
ENSMUSG00000007739	12464	Cct4	1273.54602367262	0.139783974565308	0.098441326129393	1.41997248575841	0.155615691382855	0.264222672210291
ENSMUSG00000007777	66050	0610009B22Rik	252.220680002076	-0.523230318221917	0.143476278378569	-3.64680715261757	0.000265519044711337	0.00103047391213018
ENSMUSG00000007783	78070	Cpt1c	57.3632714584381	1.06486669278802	0.255274697674456	4.17145413348413	3.02661983897961e-05	0.000142859783879276
ENSMUSG00000007805	13345	Twist2	5.33782498825771	1.00439832680027	0.60942753422385	1.64810132525344	0.0993318804201654	0.184400629826031
ENSMUSG00000007812	72611	Zfp655	172.251697371138	-0.1938231040143	0.166055458789718	-1.16721910515296	0.243121897370734	0.374482719886173
ENSMUSG00000007815	11848	Rhoa	1640.86700964412	0.499849401776134	0.086747521906863	5.76211735838172	8.30652049201673e-09	7.5013485670237e-08
ENSMUSG00000007817	328365	Zmiz1	594.300304844255	-0.0680800292858645	0.114963593287657	-0.592187729514662	0.553724885234847	0.682853356167777
ENSMUSG00000007827	232339	Ankrd26	61.1332329534114	-0.498083670385811	0.192432445468928	-2.58835597693548	0.00964352645854081	0.0255290442891984
ENSMUSG00000007833	69748	Aldh16a1	147.473081472333	0.902848169904244	0.16845791168585	5.35948808143798	8.34580994849118e-08	6.39845429384324e-07
ENSMUSG00000007836	77134	Hnrnpa0	1273.00229104044	0.751031645540946	0.105159171701809	7.14185584944112	9.20791366414528e-13	1.53908433614199e-11
ENSMUSG00000007837	65116	Prrg2	130.630690303349	-0.0382823452147432	0.157960263763333	-0.242354275073257	0.808505661540595	0.877023090484714
ENSMUSG00000007850	59013	Hnrnph1	1679.30077329978	0.0117965388048618	0.0885148859228782	0.133271807130159	0.893978423330838	0.934471587522288
ENSMUSG00000007867	76411	Ift43	103.443640974042	0.366844416904924	0.182298431552112	2.01232898046113	0.0441852694410068	0.094418294550007
ENSMUSG00000007872	15903	Id3	374.148317635354	0.710153250650995	0.228350531271336	3.10992598395648	0.0018713423021603	0.00591935873567451
ENSMUSG00000007877	21393	Tcap	19714.4623283583	-1.16125423853288	0.176084896413603	-6.5948543128039	4.25673656877883e-11	5.55559387013262e-10
ENSMUSG00000007880	93760	Arid1a	599.754962836401	-0.251482709147008	0.118707045592587	-2.11851544187291	0.0341314385420712	0.0761646654547919
ENSMUSG00000007888	12931	Crlf1	100.348782673147	0.691727211145818	0.203035610910298	3.40692555382034	0.000656990441493167	0.00231836627025534
ENSMUSG00000007891	13033	Ctsd	4777.99270744994	0.740179186300566	0.127898681844538	5.78723076442851	7.15562467463567e-09	6.50190093892821e-08
ENSMUSG00000007892	56040	Rplp1	6029.61112189959	0.620955542404649	0.145742485155499	4.26063506287904	2.03846850035466e-05	9.97122213513146e-05
ENSMUSG00000007907	70977	Cabs1	0	NA	NA	NA	NA	NA
ENSMUSG00000007908	208982	Hmgcll1	6.69899553817098	1.33872609238214	0.584780522841208	2.28927955034792	0.0220631150931983	0.0523024798667383
ENSMUSG00000007944	73032	Ttc9b	0.893992300024371	0.861704364175114	1.49076915504701	0.578026692635682	0.563246098072155	0.690791857946258
ENSMUSG00000007946	11859	Phox2a	1.65329780833914	4.3256936604646	1.35483714795781	3.19277757255538	0.00140911442226713	0.0046042540057208
ENSMUSG00000007950	64296	Abhd8	305.607494213767	-0.397588957595574	0.122085387415269	-3.25664656526984	0.00112736711309192	0.00377033129935057
ENSMUSG00000007987	67286	Ift22	113.794157618365	0.909543198199994	0.160947202532396	5.65118985536216	1.59340977918689e-08	1.37393258282357e-07
ENSMUSG00000007989	14365	Fzd3	10.9205719297362	0.663719841662556	0.48614707914019	1.36526551354875	0.172169613941928	0.285766060254129
ENSMUSG00000008028	69349	1700008O03Rik	0.475923056987091	2.30968194385865	2.14052628662371	1.07902526509111	0.280576464933075	NA
ENSMUSG00000008035	68041	Mid1ip1	335.210157965933	0.353878669436596	0.213471337743804	1.65773388210693	0.0973711918136779	0.181576822067239
ENSMUSG00000008036	232910	Ap2s1	537.816210383109	0.995559054121565	0.186142641534653	5.34836642433824	8.87516413459893e-08	6.77656104060077e-07
ENSMUSG00000008090	116701	Fgfrl1	571.933717116813	0.675535597570197	0.1973169577692	3.42360639048755	0.000617960570215464	0.00219719313854387
ENSMUSG00000008129	74666	Brme1	5.73298374647006	0.46117389792409	0.582502628969133	0.791711273029341	0.428529047670323	0.57056277481984
ENSMUSG00000008136	14200	Fhl2	69.7645803930602	1.20989564588646	0.290319389405815	4.1674641447914	3.08006941050834e-05	0.000145116759057512
ENSMUSG00000008140	69683	Emc10	800.552368244704	0.142184408645913	0.0914459174305031	1.55484698104724	0.119982516974286	0.214635391476223
ENSMUSG00000008153	232370	Clstn3	28.0077318560759	-1.28156350302196	0.568236009665451	-2.25533665804897	0.0241122053217379	0.0565049269127104
ENSMUSG00000008167	68628	Fbxw9	37.3943218896625	1.1077276292075	0.248323191141968	4.46083035625218	8.16427002142319e-06	4.31297812359624e-05
ENSMUSG00000008193	272382	Spib	5.87188565754458	1.92819264276429	0.807423174407581	2.38808186819636	0.0169365684845826	0.0415857027678158
ENSMUSG00000008200	55935	Fnbp4	326.017550610072	-0.0527017076072567	0.150381307467365	-0.350453846258079	0.725998121856097	0.81949837537337
ENSMUSG00000008206	67260	Cers4	100.793009834068	0.139962389170997	0.151583591887102	0.923334692288062	0.355832813996867	0.498301347570497
ENSMUSG00000008226	74616	Scrn3	541.184395656199	-1.08855271493361	0.149921508707875	-7.26081750587683	3.84757763580657e-13	6.80608411319329e-12
ENSMUSG00000008301	56698	Phax	244.166654127019	0.342147690981658	0.111194283525188	3.07702590578006	0.00209077129642038	0.00653421517692314
ENSMUSG00000008305	21885	Tle1	300.061337962044	-0.655773006481064	0.158529162749355	-4.13660802282722	3.52477460642918e-05	0.000164043710680426
ENSMUSG00000008307	77036	1700109H08Rik	26.0238177561874	-0.316588643898613	0.330131331863116	-0.958977877416016	0.337569890040426	0.47864595389797
ENSMUSG00000008318	320100	Relt	294.22856693018	-0.617201934465329	0.17708127753279	-3.48541609290707	0.000491372302194409	0.00179542560347915
ENSMUSG00000008333	20639	Snrpb2	257.920579645568	0.433651188435257	0.14482590024669	2.99429306288858	0.0027508158516911	0.00837563734758866
ENSMUSG00000008348	22190	Ubc	4140.08678070877	-0.720711565390809	0.247169847490967	-2.91585552488213	0.00354714714577883	0.0104962914705588
ENSMUSG00000008373	68988	Prpf31	261.429001296415	0.227596434514816	0.134624701493778	1.69059936244564	0.0909133465217554	0.171664123613738
ENSMUSG00000008384	55942	Sertad1	142.228384231114	0.650460424459869	0.241390573287153	2.69463888171845	0.00704649539778737	0.0193818742379566
ENSMUSG00000008393	52502	Carhsp1	389.283507258526	0.832314593627555	0.178724657592699	4.65696566348636	3.20903940529826e-06	1.83750719823247e-05
ENSMUSG00000008398	13713	Elk3	371.824900577872	0.658149230397328	0.17544561853999	3.75130046492049	0.000175919726570166	0.000705946573602909
ENSMUSG00000008429	80517	Herpud2	713.619284742204	-0.472552182057135	0.180368683041309	-2.619923670169	0.00879494500066314	0.0235782270680921
ENSMUSG00000008435	108841	Rdh13	238.275234769729	-0.339741264356921	0.130515881857246	-2.60306454296895	0.00923945577700119	0.0246098881546388
ENSMUSG00000008438	56622	Adam21	1.32120350250608	1.14585239096874	1.47523723311999	0.776724153406414	0.437321533499634	0.57860311776839
ENSMUSG00000008450	68051	Nutf2	515.3734054028	-0.333137133836253	0.0986490257439141	-3.37699365324756	0.000732827410176056	0.0025631546620686
ENSMUSG00000008461	14343	Fut1	0.524970615589827	1.24021077152358	2.01933158392362	0.614168956399824	0.539103684965908	NA
ENSMUSG00000008475	67771	Arpc5	651.861904035041	1.6202948278523	0.151845455176893	10.6706837288264	1.39595366941371e-26	1.32570567830773e-24
ENSMUSG00000008482	67504	Rnf151	0.579279612119426	2.94758562341631	2.6516694566689	1.11159617425286	0.266311818198245	NA
ENSMUSG00000008489	15569	Elavl2	0.340752368418322	-0.495902084959257	2.56539069852088	-0.19330470218247	0.846720343973125	NA
ENSMUSG00000008496	18987	Pou2f2	63.0110615805081	3.38648576575928	0.347233532073237	9.75276133482702	1.79517579174472e-22	1.06921915364957e-20
ENSMUSG00000008540	56615	Mgst1	410.557383588331	-0.449901801227519	0.266506521132982	-1.68814556324881	0.0913832899154054	0.172267365402184
ENSMUSG00000008575	18028	Nfib	2231.31327286809	-0.256049115209241	0.099864925715701	-2.5639543951414	0.0103487141153204	0.0271607616516203
ENSMUSG00000008590	57014	Htr3b	0	NA	NA	NA	NA	NA
ENSMUSG00000008601	53868	Rab25	0.475183198646752	1.83766063903773	2.16963544028256	0.846990515050955	0.397000408255245	NA
ENSMUSG00000008604	94232	Ubqln4	1352.67050760077	-1.13303911143618	0.119445337425794	-9.48583792264043	2.40443448591132e-21	1.22954307408587e-19
ENSMUSG00000008658	268859	Rbfox1	2379.48620104501	-1.02421619936668	0.166978582421618	-6.13381778976033	8.57947794825827e-10	9.03453661511019e-09
ENSMUSG00000008668	20084	Rps18	2531.64103705076	0.74207724968125	0.1508091645285	4.92063762836517	8.62627154532814e-07	5.46648843807264e-06
ENSMUSG00000008682	110954	Rpl10	3321.23198262627	0.67288870451278	0.118347686082015	5.68569379587589	1.30282648601139e-08	1.14103902353263e-07
ENSMUSG00000008683	267019	Rps15a	1838.89226726645	0.773862749862285	0.155229523705976	4.98528070812146	6.18719183495526e-07	4.01592596329947e-06
ENSMUSG00000008690	52683	Ncaph2	674.874898682479	0.0224641520785625	0.0923217185566198	0.243324674082897	0.80775389152843	0.876392134180156
ENSMUSG00000008730	15257	Hipk1	623.626803005783	-0.404221401294441	0.20072152848935	-2.01384178536628	0.0440261471044384	0.0941661483682685
ENSMUSG00000008734	64297	Gprc5b	503.834895880697	0.557617863727415	0.195362239435594	2.85427657534223	0.0043134960628382	0.0124936791093422
ENSMUSG00000008763	17156	Man1a2	248.10276470976	0.0282234962957994	0.138419470293432	0.203898311675151	0.838432964453851	0.898280557913437
ENSMUSG00000008789	73250	Ceacam5	0	NA	NA	NA	NA	NA
ENSMUSG00000008813	219038	Tppp2	2.36638116453781	-1.67370796470101	1.05961160907463	-1.57954853492278	0.114210293192497	0.206369638063216
ENSMUSG00000008822	66204	Acyp1	213.582896492348	-0.721696920208103	0.126733384466097	-5.69460780400106	1.23655834871829e-08	1.08715846631342e-07
ENSMUSG00000008843	57255	Cldn13	0	NA	NA	NA	NA	NA
ENSMUSG00000008845	93671	Cd163	258.25306161685	-0.0572408381895612	0.239267779447657	-0.239233374095334	0.810924625099976	0.878491020031557
ENSMUSG00000008855	15184	Hdac5	932.117365632445	-0.641496958171657	0.0998271701330412	-6.42607575990308	1.30940162526352e-10	1.58669486910569e-09
ENSMUSG00000008859	56044	Rala	617.096573663599	-0.106496808936155	0.0920885903087433	-1.15646041034079	0.247492884060604	0.379404400410691
ENSMUSG00000008874	403395	Clec3a	2.30690204145922	-1.2100894715	1.04920106506175	-1.1533437315266	0.248769327104778	0.380851221527023
ENSMUSG00000008892	22335	Vdac3	3175.28079118316	-0.637309269708201	0.109498771843688	-5.82024125912548	5.87627444179716e-09	5.41091133789421e-08
ENSMUSG00000008932	242607	Slc1a7	1.0864040414316	2.79399334950336	1.70453789051713	1.639150038874	0.101182015935684	0.187324936484355
ENSMUSG00000008958	21427	Vps72	485.910568033837	-0.384889938952014	0.106529556397367	-3.61298734330906	0.000302689483863146	0.00116030968814206
ENSMUSG00000008976	14390	Gabpa	360.668894198462	-0.436668664242209	0.092901267119671	-4.70035208109393	2.59713322701609e-06	1.51234025268007e-05
ENSMUSG00000008999	12162	Bmp7	8.33801526001857	-1.6378121965845	0.588370280015104	-2.78364195510089	0.00537523349546584	0.0152432657044943
ENSMUSG00000009013	56455	Dynll1	811.353662232789	1.25882192473761	0.13155182938395	9.5690187710243	1.07925068873498e-21	5.74707963655049e-20
ENSMUSG00000009030	67466	Pdcl	225.382097871658	0.354103349502282	0.131754078795817	2.68760825272852	0.00719657711534329	0.0197505741367685
ENSMUSG00000009035	223693	Tmem184b	628.52145208434	-0.025678700694119	0.117429627351018	-0.218673100420908	0.826904704616216	0.890698941706616
ENSMUSG00000009047	546672	Gm5965	0	NA	NA	NA	NA	NA
ENSMUSG00000009070	71236	Rsph14	0	NA	NA	NA	NA	NA
ENSMUSG00000009073	18016	Nf2	1081.86293216722	-0.865408459080678	0.0944590354097769	-9.16173297055609	5.1070481980952e-20	2.23452333898824e-18
ENSMUSG00000009075	192650	Cabp7	10.6063422579218	-1.36871284418474	0.496375661574691	-2.75741328622492	0.00582606635256814	0.0163976475544557
ENSMUSG00000009076	67178	Zmat5	94.1025167801388	-0.134287505074663	0.190691668922095	-0.704212752626989	0.481300290405963	0.619411502197345
ENSMUSG00000009079	14030	Ewsr1	1052.47707334285	0.477202837505413	0.107078118358962	4.45658594695947	8.32752231915035e-06	4.3890941164463e-05
ENSMUSG00000009090	11764	Ap1b1	781.048048679761	0.270919716748449	0.09339824951874	2.90069372974801	0.00372337600592233	0.0109616189614353
ENSMUSG00000009092	70377	Derl3	3.33369467529629	0.704441039657363	0.776821543684638	0.906824798287701	0.364499453956171	0.507575156911194
ENSMUSG00000009093	75886	Gstt4	0.104855631288671	-1.5156555491453	4.32001419999503	-0.35084503869155	0.725704606275861	NA
ENSMUSG00000009097	21380	Tbx1	715.616891421078	-0.366541290547319	0.129962500297831	-2.82036194831069	0.0047969508858783	0.0137566885410771
ENSMUSG00000009108	14686	Gnat2	2.54346008699296	0.6400628390239	0.914133073963652	0.700185626419366	0.483811386818888	0.621401374855945
ENSMUSG00000009112	94044	Bcl2l13	884.938053116732	-0.828281128742252	0.124281325880065	-6.66456624015717	2.65448160585692e-11	3.56374963736152e-10
ENSMUSG00000009114	76964	2610028H24Rik	1.9151606890753	-1.28396701578788	1.02753820148386	-1.24955647773846	0.21146161011912	0.336042632737109
ENSMUSG00000009115	76573	Spatc1l	0.412523580287288	-0.857707837422511	2.09284241338507	-0.409829154807317	0.681931277701039	NA
ENSMUSG00000009145	93838	Dqx1	11.7150261689659	0.475041104959067	0.421045420241171	1.12824194759551	0.2592177528959	0.393138022643413
ENSMUSG00000009185	20307	Ccl8	147.354153956573	5.14610279201367	0.379908124661494	13.5456507980685	8.40655323003604e-42	3.68600529711878e-39
ENSMUSG00000009207	69605	Lnpk	287.091542745929	-0.197295661299036	0.126088350911441	-1.56474138866016	0.117643559624776	0.21136865533979
ENSMUSG00000009210	75573	Prr29	87.1374487485886	-0.121718252976964	0.197563797542996	-0.616095937062933	0.537831203451514	0.669281931919961
ENSMUSG00000009214	66139	Mymk	217.628372999871	6.07655145613289	0.729620215886667	8.3283759465853	8.19588913924746e-17	2.41632165066684e-15
ENSMUSG00000009216	109349	Fam163b	0.834546589485363	0.4751912921261	1.89313519634705	0.251007584161458	0.801808245556136	0.871961178069702
ENSMUSG00000009246	56843	Trpm5	2.17457575835372	2.66728276126998	1.23351849899789	2.16233705731766	0.0305922053284498	0.0692111282696997
ENSMUSG00000009248	17173	Ascl2	1.25343876118053	2.71176875379799	1.47981819777479	1.83250128824993	0.0668767699967219	0.133004871269296
ENSMUSG00000009281	71660	Rarres2	167.478699555175	0.00100204884825486	0.182314268241048	0.0054962722222596	0.995614631331507	0.997453880528911
ENSMUSG00000009291	108705	Pttg1ip	704.140619886218	0.596971559472469	0.118133291892673	5.05337276146366	4.34075532240055e-07	2.89589788553028e-06
ENSMUSG00000009292	28240	Trpm2	11.5233628313295	3.5764465657733	0.733448198822789	4.87620880590289	1.08144134660044e-06	6.72085140854701e-06
ENSMUSG00000009293	22213	Ube2g2	1045.87910055001	0.118648462669159	0.117436430226887	1.01032075344874	0.312341641253102	0.451795924962724
ENSMUSG00000009350	17523	Mpo	0.852425278649336	1.246285579051	2.14010969580905	0.582346587883593	0.560333250888258	0.688571713435017
ENSMUSG00000009356	76113	Lpo	0	NA	NA	NA	NA	NA
ENSMUSG00000009376	17295	Met	204.883894849749	0.0291104431764365	0.239265416548781	0.12166590390008	0.903163617327123	0.940114952312221
ENSMUSG00000009378	240638	Slc16a12	21.0113665425587	-0.378246119840055	0.373400774570413	-1.01297625928928	0.311071500829264	0.450274741103426
ENSMUSG00000009394	20965	Syn2	36.3375238097325	0.761628382961777	0.236860934113365	3.21550865199768	0.00130213569554998	0.00428733222781497
ENSMUSG00000009406	13712	Elk1	133.279335901834	-0.185068563966573	0.168568262800145	-1.09788498079256	0.272254717085395	0.408312729036883
ENSMUSG00000009418	215690	Nav1	486.110295257885	0.74076562943996	0.109462643258796	6.76729162924208	1.31215425863923e-11	1.84705430068561e-10
ENSMUSG00000009470	238799	Tnpo1	570.753414556181	0.220591292272404	0.149439670671171	1.47612271414727	0.139910952231358	0.242394695551393
ENSMUSG00000009471	17927	Myod1	585.058578449114	0.645906372917139	0.216392368821625	2.98488517148018	0.00283684795343492	0.00859963554582898
ENSMUSG00000009487	18419	Otog	27.021899089601	-0.113268813740864	0.36126462379664	-0.313534197039522	0.753874843957223	0.83954892106298
ENSMUSG00000009535	67897	Rnmt	383.418522074712	-0.231052756271579	0.123188978497023	-1.87559600778054	0.0607107750220565	0.122599475909313
ENSMUSG00000009545	16535	Kcnq1	11.1938645620963	0.778830313790181	0.392006777209801	1.98677767597205	0.0469470395512473	0.0993310668451852
ENSMUSG00000009549	20813	Srp14	958.594350018784	0.14614348148849	0.128442768737548	1.13781011515806	0.255199780301372	0.388416327359725
ENSMUSG00000009551	NA	6330409D20Rik	3.46279174733662	-0.709400826895892	0.89236981452127	-0.794962822982157	0.426635128268399	0.568994092891222
ENSMUSG00000009555	107951	Cdk9	423.229496770022	0.665472991751402	0.114562175381685	5.80883690043644	6.2908335397964e-09	5.77725033815171e-08
ENSMUSG00000009563	30933	Tor2a	96.8898508031298	0.953609640200401	0.196769077927051	4.84633891791643	1.25760606916648e-06	7.72251068932743e-06
ENSMUSG00000009566	14287	Fpgs	131.928941890223	0.558177086061633	0.15672402847483	3.56152844904236	0.000368702148141672	0.00138375776159235
ENSMUSG00000009569	239719	Mrtfb	447.07474905381	-0.398867653078068	0.144583594484473	-2.75873382799943	0.00580257760168304	0.0163359998928257
ENSMUSG00000009575	12419	Cbx5	474.880696836646	0.258988172229329	0.124911646080398	2.07337090140205	0.0381377748508773	0.0834548313890499
ENSMUSG00000009580	69592	Odam	0	NA	NA	NA	NA	NA
ENSMUSG00000009585	80287	Apobec3	141.417218362158	2.05738920271268	0.261731688839314	7.86068057649597	3.82051913127273e-15	8.95713973347763e-14
ENSMUSG00000009588	20445	St6galnac1	0.0560155469472164	0	4.32794324778021	0	1	NA
ENSMUSG00000009596	74469	Taf7l	0.465459008404018	2.30208127177784	2.44774193993108	0.940491819918996	0.346965343610739	NA
ENSMUSG00000009614	192166	Sardh	51.0652976379927	1.49713140134868	0.225036223967976	6.65284626159443	2.8747844534496e-11	3.84199468331319e-10
ENSMUSG00000009621	22325	Vav2	114.278167151432	0.818484861682434	0.178398615442345	4.58795523526331	4.47608584970527e-06	2.48366120599693e-05
ENSMUSG00000009628	104271	Tex15	0.690723526683438	-0.152171329529423	1.98697058518231	-0.0765845909668869	0.938954017574885	NA
ENSMUSG00000009630	19053	Ppp2cb	460.09686650649	-0.318134056952209	0.0933455907487078	-3.4081315935816	0.000654093425769223	0.00231012121992325
ENSMUSG00000009633	14373	G0s2	343.74213755167	-0.0683915234763985	0.338268180907857	-0.202181367732687	0.839774938735518	0.899250815144793
ENSMUSG00000009640	66233	Dmap1	211.418401230214	0.116142208571313	0.112101079377181	1.03604897666092	0.300179294160856	0.438373236123035
ENSMUSG00000009646	69836	Pla2g12b	0.268885853758091	-0.762623777584536	3.19972031853096	-0.238340761587146	0.81161680891533	NA
ENSMUSG00000009647	215999	Mcu	513.539786391655	0.136898835188698	0.117261276108223	1.16746840672577	0.243021259742542	0.374415529364108
ENSMUSG00000009654	18302	Oit3	6.31799514309731	2.69103869231011	0.744552503611785	3.61430346316212	0.000301156162590715	0.00115507653055452
ENSMUSG00000009670	83558	Tex11	0.178816515053149	0.569145655227189	4.32794324778021	0.131504879487295	0.895375926824784	NA
ENSMUSG00000009681	110279	Bcr	149.53195857131	0.000999033292084843	0.206132020921227	0.0048465701137555	0.996133011672163	0.997572608300389
ENSMUSG00000009687	18301	Fxyd5	354.472966582418	2.50787313156468	0.202311864359991	12.3960754328387	2.7443898557817e-35	6.73290311285109e-33
ENSMUSG00000009731	16506	Kcnd1	15.9351494042108	1.57600863955421	0.404232573470252	3.89876705388808	9.66837305333676e-05	0.000410393062581182
ENSMUSG00000009733	21422	Tfcp2	148.035458195592	-0.17727222558901	0.136697117202041	-1.296824901779	0.194691440546079	0.314534431387081
ENSMUSG00000009734	218030	Pou6f2	0.183758819450797	0.569142239734133	4.17032361611625	0.136474358377052	0.891446293926918	NA
ENSMUSG00000009739	19009	Pou6f1	238.036069612245	-0.517152331387684	0.181161570542865	-2.85464698632274	0.00430846895012296	0.012480872662937
ENSMUSG00000009741	22221	Ubp1	353.26627965437	0.0117570975443523	0.142107104069767	0.0827340590839156	0.934063002465862	0.959771158497033
ENSMUSG00000009772	74137	Nuak2	42.7732303586889	1.26794792386079	0.321425901212124	3.94475964469339	7.98800600263536e-05	0.000345470782166442
ENSMUSG00000009828	56542	Cilk1	128.619137023822	0.210720674461867	0.134360573476091	1.56832223181426	0.116805950094539	0.210120200728724
ENSMUSG00000009863	67680	Sdhb	5402.77513088459	-0.52647598075291	0.155222791920377	-3.39174404892143	0.000694492830885793	0.00244067330472279
ENSMUSG00000009876	84682	Cox4i2	38.0449602622803	-0.0887958570064376	0.238665224840038	-0.372051927824642	0.70985418717406	0.807455709514988
ENSMUSG00000009894	67826	Snap47	329.377607338809	0.0220425640973252	0.116470656671353	0.189254227006919	0.849893568505444	0.906740870768285
ENSMUSG00000009900	22416	Wnt3a	0.0548068480796777	-0.873495337950308	4.32794324778021	-0.201826892808339	0.840052056737723	NA
ENSMUSG00000009905	70750	Kdsr	95.7725912072698	-0.0868724391666773	0.170401950095392	-0.509808949475318	0.610185315209567	0.729898942177778
ENSMUSG00000009907	20479	Vps4b	365.878046744682	0.502727531606304	0.090568836348863	5.5507783015986	2.84400566371087e-08	2.35947136544902e-07
ENSMUSG00000009927	75617	Rps25	2649.10539069498	0.343197071355602	0.115715169333275	2.965877968576	0.00301820222059075	0.00908148800729073
ENSMUSG00000009941	83454	Nxf2	0.766032167446621	0.385005095640325	1.52034574919375	0.253235223530236	0.800086448925504	0.87077800578066
ENSMUSG00000009995	66826	Tafazzin	534.233066676199	-0.211498574701229	0.0847403859795028	-2.49584153124328	0.0125658724271074	0.0321366963238804
ENSMUSG00000010021	286942	Kif19a	20.07373149255	-0.338907585895446	0.326407476452395	-1.03829602672987	0.29913225792587	0.437261850711897
ENSMUSG00000010025	11671	Aldh3a2	273.513656683218	0.20918625223334	0.100600043485272	2.07938530626942	0.0375819499571599	0.0824538299496595
ENSMUSG00000010044	114602	Zmynd10	2.55085432323588	-0.89037608601425	0.978619104165158	-0.909829046075913	0.362912673807364	0.506083663677233
ENSMUSG00000010045	56395	Tmem115	277.402590489999	0.136278155593613	0.0922450940582784	1.47734854611905	0.139582231117276	0.241926881317478
ENSMUSG00000010047	15587	Hyal2	196.501365464192	0.0485746083892701	0.14428416675254	0.336659312539676	0.736373738492661	0.827481869396191
ENSMUSG00000010048	15983	Ifrd2	637.139812789428	-0.512939897895658	0.0894001469686405	-5.73757331825848	9.60427068081163e-09	8.58675966117857e-08
ENSMUSG00000010051	15586	Hyal1	30.8071743376617	0.611985656284075	0.322051652622283	1.90027174616564	0.0573974671450991	0.117148361189086
ENSMUSG00000010054	80385	Tusc2	253.075170798885	-0.513155892793375	0.125392856087641	-4.09238539422626	4.26958275148965e-05	0.000195199379677814
ENSMUSG00000010057	56032	Nprl2	121.579966556452	-0.00195119435182408	0.147530605178453	-0.013225692048534	0.989447732141339	0.994175468745427
ENSMUSG00000010064	76257	Slc38a3	901.4950469068	-1.09124296238144	0.202978681034663	-5.37614569578904	7.60972223545609e-08	5.87125255815347e-07
ENSMUSG00000010066	56808	Cacna2d2	8.62548907974299	-0.943239022449245	0.485219061585118	-1.94394469864367	0.0519021202456497	0.10794216308632
ENSMUSG00000010067	56289	Rassf1	107.869289930378	0.0421258537837596	0.219439751668137	0.191970021217794	0.847765688252228	0.905265472173291
ENSMUSG00000010080	71889	Epn3	1.01298054973071	-0.994133382024312	1.36033930180175	-0.730798103611062	0.464902482059767	0.604537503173125
ENSMUSG00000010086	22671	Rnf112	4.16890550737347	0.0974337054841705	0.697515099643067	0.139686876361572	0.888907395883816	0.931618065485865
ENSMUSG00000010095	17254	Slc3a2	622.005523220397	0.65316422680807	0.220747868888298	2.95886990935609	0.00308769417381494	0.00926353203289827
ENSMUSG00000010097	53319	Nxf1	1159.52942919507	0.00529831591388904	0.0827144734680069	0.0640554874104152	0.948926044917169	0.968084071773016
ENSMUSG00000010110	56389	Stx5a	332.790838685567	0.590276832433518	0.108586659911148	5.43599768992357	5.44906606545123e-08	4.30906958851953e-07
ENSMUSG00000010122	67473	Slc47a1	361.946489322486	-1.1438296215146	0.181627332608212	-6.29767340129336	3.02146280419767e-10	3.44012737397268e-09
ENSMUSG00000010136	100503311	Pifo	1.02341400854172	-0.0120623225862872	1.5197213459316	-0.00793719362998941	0.993667102241015	0.996326163722222
ENSMUSG00000010142	57916	Tnfrsf13b	32.224570826722	2.45306236632255	0.337589969195729	7.26639589489789	3.69205506870157e-13	6.56478609627281e-12
ENSMUSG00000010154	234857	Spire2	3.97078099999607	0.434995978995295	0.82005762713414	0.530445623090511	0.595803001000245	0.718407831292087
ENSMUSG00000010175	19130	Prox1	42.0903352253467	0.143185307847348	0.246694056064349	0.580416529411633	0.56163376100507	0.689470932673645
ENSMUSG00000010205	71766	Raver1	0	NA	NA	NA	NA	NA
ENSMUSG00000010277	72503	Bltp2	4647.03578613163	-1.04370354950502	0.124543127881189	-8.38025804603756	5.28117900020915e-17	1.59114819936126e-15
ENSMUSG00000010290	98404	AI597479	273.991683686277	-0.6024145945367	0.121760929204918	-4.94751968854363	7.51651032661182e-07	4.80608888646654e-06
ENSMUSG00000010307	67893	Tmem86a	162.100170666205	1.62505126678359	0.321337499154008	5.05714792410442	4.25573130460873e-07	2.84101427681816e-06
ENSMUSG00000010311	269120	Optc	1.85436908877733	0.731535585960523	1.13552863760995	0.644224691241826	0.519429741893395	0.653011250395931
ENSMUSG00000010342	83560	Tex14	0.97646736741156	-0.124836789343192	1.20038381425518	-0.103997394717165	0.917171416075171	0.949232534779169
ENSMUSG00000010358	70110	Ifi35	179.448125888959	0.622332074540391	0.148238734492519	4.19817449650312	2.69075265641755e-05	0.000128299469559123
ENSMUSG00000010362	66599	Rdm1	240.837051420232	-0.472154052347017	0.155523287777141	-3.03590580610407	0.00239814269999685	0.00740055776602802
ENSMUSG00000010376	18002	Nedd8	860.139386675516	0.400161820290375	0.130713649880633	3.06136215043953	0.0022033242125542	0.006852717381877
ENSMUSG00000010392	53334	Gosr1	306.493398397501	-0.283319258165502	0.100385746199419	-2.82230564489386	0.00476797121902026	0.0136850070865696
ENSMUSG00000010406	68836	Mrpl52	439.463471010359	0.259676263920885	0.11439934958956	2.26991031725746	0.0232130250011257	0.0547100682586774
ENSMUSG00000010435	78634	Spaca7	0	NA	NA	NA	NA	NA
ENSMUSG00000010453	226976	Kansl3	565.23112685103	-0.587042526300434	0.116413723677949	-5.04272613016355	4.58945892951033e-07	3.04800417722684e-06
ENSMUSG00000010461	14051	Eya4	505.543521890855	-0.924101514031676	0.176772462461747	-5.22763274982181	1.71694118285967e-07	1.23897998127762e-06
ENSMUSG00000010476	13593	Ebf3	180.16060011929	-0.123564415303307	0.142190158513206	-0.869008211224631	0.384842639539386	0.528584764941228
ENSMUSG00000010492	100271841	Uckl1os	258.489337582921	-1.01827944793031	0.16785452154177	-6.06644038288187	1.30776238033261e-09	1.33483740138159e-08
ENSMUSG00000010505	17932	Myt1	0.0362982788231126	0	4.32794324778021	0	1	NA
ENSMUSG00000010517	14084	Faf1	844.030784211534	-0.782910465462091	0.0971740568157147	-8.05678481600122	7.8327358286179e-16	2.01268104683488e-14
ENSMUSG00000010529	212539	Gm266	18.9999181401008	2.97825260337971	0.505675252745723	5.88965464931959	3.8700350161186e-09	3.67190062671142e-08
ENSMUSG00000010538	76927	Tsacc	11.3046032756679	0.185710100600331	0.39748191331038	0.467216480502638	0.640345003731675	0.753768768886866
ENSMUSG00000010554	67493	Mettl16	232.914832901693	-0.280807757435091	0.145351969246989	-1.931915741423	0.0533699065293528	0.110348854595857
ENSMUSG00000010592	13164	Dazl	4.46831525604523	-1.86594805198221	0.716997429987595	-2.60244733654693	0.00925610299347257	0.0246446731898556
ENSMUSG00000010601	75761	Apol7a	0.598600847804071	1.50116746548309	1.68780736457533	0.889418719807995	0.373778087998307	NA
ENSMUSG00000010607	66268	Pigyl	216.131735065534	-0.141496093799347	0.181824537187482	-0.778201314234325	0.436450342165099	0.577888365434834
ENSMUSG00000010608	67039	Rbm25	1301.22704312228	0.328885696446585	0.111464185593455	2.95059524900792	0.00317162236346625	0.00947669909617407
ENSMUSG00000010609	19165	Psen2	201.502875274646	0.784954124770041	0.126878793480835	6.18664556333922	6.14579343880327e-10	6.64145312988242e-09
ENSMUSG00000010651	235674	Acaa1b	9.26131119124482	-0.0232514379215979	0.694675749421456	-0.0334709221402392	0.973299053604936	0.983319290944726
ENSMUSG00000010660	18799	Plcd1	207.559609956688	0.452364689304586	0.130830252946501	3.45764591229192	0.000544917068405355	0.00196804257723406
ENSMUSG00000010663	76267	Fads1	282.7871429306	0.820820899875392	0.184145529625268	4.45745765072735	8.29374152176309e-06	4.37240791201058e-05
ENSMUSG00000010721	56873	Lmbr1	199.077739909569	-0.42125227974443	0.132974055574957	-3.16792834454065	0.0015352935605535	0.00496536875327788
ENSMUSG00000010751	79202	Tnfrsf22	68.1973988582549	1.05597718474306	0.206133631438429	5.1227797102991	3.01064008607099e-07	2.06673120898571e-06
ENSMUSG00000010755	27267	Cars	583.453052998444	-0.281591808983593	0.119418627494285	-2.35802248687768	0.018372579987963	0.0446804494208098
ENSMUSG00000010760	22113	Phlda2	0.0618592807812329	0.569152411104117	4.32794324778021	0.131506440477479	0.895374692057978	NA
ENSMUSG00000010796	74068	Asz1	0	NA	NA	NA	NA	NA
ENSMUSG00000010797	22413	Wnt2	7.01249623811961	1.50812882186032	0.565634957998979	2.66625815914129	0.00767007690017887	0.0208970048597152
ENSMUSG00000010803	14394	Gabra1	0.883681354020771	-3.56351694135112	1.85009783772168	-1.92612351017039	0.0540889536934438	0.111600436295003
ENSMUSG00000010825	170935	Grid2ip	0.412463981431422	0.569169125674443	2.10074025508784	0.270937410894068	0.786439171028238	NA
ENSMUSG00000010830	105785	Kdelr3	155.281668457333	1.58454286416998	0.207733391856755	7.62777158745196	2.38846256700043e-14	5.04835246981998e-13
ENSMUSG00000010841	75437	Cfap97d1	0.44068773750455	-2.28188350617175	2.54197032013559	-0.897682985555092	0.369354582862014	NA
ENSMUSG00000010911	56369	Apip	242.521621353175	-0.269198936520157	0.139304042073991	-1.93245603294966	0.0533032437752739	0.110233140764761
ENSMUSG00000010914	27402	Pdhx	966.821138404162	-0.68812982002663	0.136411508618928	-5.04451440346541	4.54674584187997e-07	3.02353463405816e-06
ENSMUSG00000010936	234729	Vac14	389.263602966818	-0.0571047008620125	0.102984456734958	-0.55449824830341	0.57923790415276	0.704784479469805
ENSMUSG00000011008	68279	Mcoln2	19.7622448037427	4.23379464318242	0.690869127758526	6.12821513231987	8.88703697865684e-10	9.33931963570424e-09
ENSMUSG00000011034	20537	Slc5a1	0.116957234271917	0	4.32794324778021	0	1	NA
ENSMUSG00000011096	67605	Akt1s1	1938.73772073743	-0.698485910823727	0.109809386199551	-6.36089440983125	2.00582301678021e-10	2.35801487334892e-09
ENSMUSG00000011114	21376	Tbrg1	359.384268013458	0.101740118396644	0.103307368565327	0.984829250900032	0.324707949978966	0.465514601147716
ENSMUSG00000011118	208098	Panx3	0.0362982788231126	0	4.32794324778021	0	1	NA
ENSMUSG00000011148	11565	Adssl1	12963.9462241219	-1.27765748549023	0.152075060693083	-8.40149252393716	4.40839247119205e-17	1.35594256785561e-15
ENSMUSG00000011154	75556	Cfap161	1.27164552080929	1.62474723866429	1.49234641910831	1.08871989630604	0.276277425132881	0.412933360685989
ENSMUSG00000011158	72308	Brf1	241.566347847942	0.118097971459585	0.129215575346157	0.913960806529791	0.360737440502489	0.503663765167703
ENSMUSG00000011171	22355	Vipr2	23.2804157926023	0.399911704723396	0.351946149850262	1.13628663047895	0.255836624294359	0.389034389562299
ENSMUSG00000011179	18263	Odc1	2112.2595422217	-0.795438832334693	0.241330523195239	-3.29605564104784	0.000980525933503621	0.00333113723007627
ENSMUSG00000011254	66628	Thg1l	59.7405218722611	0.716907389981021	0.247904587234103	2.89186819001468	0.00382958576160354	0.0112405787459231
ENSMUSG00000011256	11492	Adam19	241.298798904905	1.20653539547114	0.190995666581091	6.31708256563446	2.66547193622287e-10	3.0652927266563e-09
ENSMUSG00000011257	230721	Pabpc4	5380.93953810175	-0.893827398683754	0.09176815293933	-9.74006090407729	2.03432397552648e-22	1.20124207701002e-20
ENSMUSG00000011263	74463	Exoc3l2	41.3142159862718	-0.645423474235831	0.322637475077519	-2.00046034355047	0.045450577987775	0.0966111924880935
ENSMUSG00000011267	63872	Zfp296	8.73722314432068	1.09273498859555	0.490139370543602	2.22943728716103	0.0257848236145639	0.0597586195511621
ENSMUSG00000011305	66968	Plin5	269.012456663072	-1.32459205645932	0.226521219419612	-5.84754072864856	4.98893708907043e-09	4.6563412831324e-08
ENSMUSG00000011306	70616	Sugp1	300.883239091369	-0.077644421365662	0.107684878201569	-0.721033655443468	0.470888808174329	0.610012355975394
ENSMUSG00000011349	71241	Dmrtc2	0	NA	NA	NA	NA	NA
ENSMUSG00000011350	545936	Gm5893	0.0618592807812329	0.569152411104117	4.32794324778021	0.131506440477479	0.895374692057978	NA
ENSMUSG00000011382	71755	Dhdh	376.23582194941	-1.25804383916785	0.142198506492191	-8.84709600826177	8.9826110905076e-19	3.40909114830903e-17
ENSMUSG00000011427	233056	Zfp790	96.0273740809804	-0.389100815428907	0.166821243892608	-2.33244163842462	0.0196774697837798	0.0474062774496298
ENSMUSG00000011463	76703	Cpb1	0.497679927655569	-0.74285275840459	1.99166731143358	-0.372980343725123	0.709163073524264	NA
ENSMUSG00000011486	103775	Slc25a41	0.390337567559604	-2.29365809684694	2.95102046427532	-0.777242355521989	0.437015797340574	NA
ENSMUSG00000011589	240121	Fsd1	1.73183219549616	0.77396466722646	1.08578482549037	0.712815881246928	0.475959696991982	0.614534016390625
ENSMUSG00000011632	641361	Pinlyp	0.325631250993557	1.72243525728073	3.04016442001461	0.566559902464898	0.571013223982431	NA
ENSMUSG00000011658	70300	Fuz	118.421036337488	-0.0722402059302324	0.16668355719333	-0.433397313728095	0.664726151737442	0.773705769594588
ENSMUSG00000011751	80297	Sptbn4	1.18567488308131	0.10871035491208	1.22845810417321	0.0884933352979472	0.929484581220785	0.957441443239278
ENSMUSG00000011752	18648	Pgam1	283.081444577548	0.873965138515868	0.220999634687326	3.95459992389747	7.66628268871282e-05	0.000333375719875488
ENSMUSG00000011831	14020	Evi5	208.915042474316	-0.167916669357104	0.138462283913082	-1.21272497182346	0.225234989083514	0.353272140576379
ENSMUSG00000011832	213027	Evi5l	206.383716904907	-0.733003641328679	0.125249701528888	-5.85233842780548	4.84709047762897e-09	4.53216155004436e-08
ENSMUSG00000011837	102209	Snapc2	177.388830138677	0.0328787867343187	0.142511226722192	0.230710151687992	0.817539986364941	0.883845558651176
ENSMUSG00000011877	216963	Git1	753.433357243035	-0.561902506458848	0.112068254249987	-5.0139311102806	5.33290868478852e-07	3.50224927266163e-06
ENSMUSG00000011884	56356	Gltp	325.120394945088	1.37320223335572	0.134856853568723	10.1826655228608	2.36979445476804e-24	1.76305863263032e-22
ENSMUSG00000011958	12175	Bnip2	949.953434805538	-0.159594248351405	0.0650997850685968	-2.45153264612529	0.0142249282279988	0.035740955976908
ENSMUSG00000011960	12455	Ccnt1	288.620757410469	0.161171195501306	0.13119863927277	1.22845173086149	0.219277438668886	0.345770101468239
ENSMUSG00000012017	224024	Scarf2	308.726028173429	1.0739878898383	0.125983109032124	8.52485621357742	1.52999756784834e-17	5.0529150445863e-16
ENSMUSG00000012042	67741	4930579F01Rik	0.0486840177887557	0	4.32794324778021	0	1	NA
ENSMUSG00000012076	52592	Brms1l	245.039744512312	-0.225492741859328	0.106125589040107	-2.12477258217252	0.0336055936743717	0.0751458414107478
ENSMUSG00000012114	94112	Med15	320.307590917266	0.369390682743543	0.143339023717171	2.57704198873578	0.00996498449315578	0.0262774664664049
ENSMUSG00000012117	67422	Dhdds	247.709191632196	0.612288892968394	0.117427503525186	5.21418640937953	1.84625739558752e-07	1.3243185662467e-06
ENSMUSG00000012123	230806	Crybg2	0.365613476533997	0.614720353150012	2.64253620162759	0.232625139731821	0.816052504104067	NA
ENSMUSG00000012126	67586	Ubxn11	16.7364105206069	1.08747316274087	0.347387911362746	3.13042891583329	0.00174551238147547	0.00556490085975347
ENSMUSG00000012187	68393	Mogat1	2.00464917366332	-0.0221900324932123	1.1177583456458	-0.0198522628613357	0.984161226348799	0.990668667734676
ENSMUSG00000012211	75671	Tex22	0.208366472635283	1.24879255055918	3.37393632568198	0.370129258532096	0.711286182604397	NA
ENSMUSG00000012282	20890	Wnt8a	0	NA	NA	NA	NA	NA
ENSMUSG00000012296	74094	Tjap1	431.976033384623	-0.301282329553467	0.0982596323107677	-3.06618620961857	0.00216808245504672	0.00675126068806328
ENSMUSG00000012350	13661	Ehf	1.20288963418941	-0.664193684350659	1.3100979694166	-0.506980164732588	0.612168736121449	0.731498713334021
ENSMUSG00000012396	71950	Nanog	0.124560481907046	0.569145655227189	4.32794324778021	0.131504879487295	0.895375926824784	NA
ENSMUSG00000012405	66480	Rpl15	2116.77365767914	0.164300018573442	0.086623480788918	1.89671457527554	0.0578656189879663	0.117934326366893
ENSMUSG00000012422	66074	Tmem167	368.052257638187	0.22413773973321	0.1326115012827	1.69018326137034	0.0909928996809484	0.171737118746459
ENSMUSG00000012428	117167	Steap4	851.408056233438	-0.157296632673715	0.223791081103992	-0.702872660955699	0.48213511007929	0.620021238596819
ENSMUSG00000012429	66308	Mplkip	59.9615268032251	0.517163801917016	0.201373193431232	2.5681859293433	0.0102232305649827	0.0268724917708117
ENSMUSG00000012443	16551	Kif11	54.2452476682426	2.79660214090056	0.485597496995348	5.75909504930448	8.45660761571252e-09	7.63020007638369e-08
ENSMUSG00000012483	68240	Rpa3	69.7259497930845	0.656254490003921	0.203625958937156	3.2228429686927	0.00126925115308084	0.00419178329530288
ENSMUSG00000012519	74568	Mlkl	55.5883277177377	1.9784432200928	0.248672283537243	7.95602626859091	1.77652698764212e-15	4.33262345104483e-14
ENSMUSG00000012520	18935	Phox2b	0	NA	NA	NA	NA	NA
ENSMUSG00000012535	320938	Tnpo3	441.317308067978	-0.672820001145556	0.145032492752392	-4.6390983729021	3.49932467688128e-06	1.99026067023655e-05
ENSMUSG00000012609	320244	Ttll5	82.9741619312032	0.0811888482231243	0.199036387077473	0.407909575807976	0.683340062279223	0.787444432794242
ENSMUSG00000012640	69930	Zfp715	159.785656183696	-0.401415537808249	0.131873076207519	-3.04395369663305	0.00233491074876294	0.00721839794637062
ENSMUSG00000012705	57264	Retn	126.192607523402	-0.864097212273536	0.383763492984486	-2.2516399503078	0.0243450342810523	0.0569857413066703
ENSMUSG00000012777	100503991	Acp4	0.201009234554597	0.569144523160793	4.05905691202844	0.140215950526393	0.888489369705949	NA
ENSMUSG00000012819	22295	Cdh23	66.0149574273753	-1.55315488048536	0.265723855386787	-5.8449960325338	5.06580339955833e-09	4.72450938954526e-08
ENSMUSG00000012848	20103	Rps5	3386.86160587417	0.422168245434723	0.13695260746331	3.08258640163404	0.00205210148719501	0.00642798410824057
ENSMUSG00000012889	244550	Podnl1	6.31139060107774	3.5056470910812	0.817906640971727	4.28612131931861	1.81819719415804e-05	9.00057837550057e-05
ENSMUSG00000013033	330814	Adgrl1	365.457496399167	-1.29652400686697	0.124002395494903	-10.455636777761	1.38068176644048e-25	1.2159440103763e-23
ENSMUSG00000013076	75723	Amotl1	5689.76951134114	-0.792072588171147	0.116182726005898	-6.81747291874474	9.26558631403232e-12	1.33341622038812e-10
ENSMUSG00000013083	69147	2200002J24Rik	0	NA	NA	NA	NA	NA
ENSMUSG00000013089	104156	Etv5	245.221035812491	0.0145557942650602	0.18672313564866	0.0779538872593082	0.937864733950599	0.961444572013406
ENSMUSG00000013091	78052	Tmem190	0.863041038067121	-1.35480957703266	1.80841263331288	-0.749170599715811	0.453754387037697	0.594391711675113
ENSMUSG00000013150	70575	Gfod2	126.325786787706	-0.392508615068807	0.170638848027372	-2.30023010355676	0.0214351871882395	0.0510327617656705
ENSMUSG00000013155	102124	Enkd1	23.1542016705258	1.06483336775145	0.329627709833588	3.23041217708618	0.00123611873716899	0.00409548793176503
ENSMUSG00000013158	71046	4933405L10Rik	1.3821798885797	-0.570691924663225	1.37439360217843	-0.415231796596456	0.6779722241454	0.783515679407155
ENSMUSG00000013160	11972	Atp6v0d1	585.513335337975	0.667858641660924	0.112677050392962	5.92719315363478	3.081564350009e-09	2.98285007632623e-08
ENSMUSG00000013236	19280	Ptprs	740.958379898414	0.0684345970069644	0.123296996454894	0.555038638203972	0.578868232368199	0.70445946218518
ENSMUSG00000013275	98396	Slc41a1	956.695282257559	-0.958541180619171	0.19520925962434	-4.91032639775277	9.09249211432622e-07	5.73547834380272e-06
ENSMUSG00000013338	74562	Fer1l4	0	NA	NA	NA	NA	NA
ENSMUSG00000013353	74054	4931406B18Rik	0.0493838546533454	0	4.32794324778021	0	1	NA
ENSMUSG00000013367	210094	Iglon5	16.1117860641044	1.44348358442313	0.398842828871888	3.61917898462904	0.000295539181103569	0.00113585815818395
ENSMUSG00000013415	140486	Igf2bp1	0.0362982788231126	0	4.32794324778021	0	1	NA
ENSMUSG00000013418	14422	B4galnt2	1.70107729474689	-0.26422283994488	1.18075408939452	-0.223774655805234	0.822932651636285	0.887905554184323
ENSMUSG00000013419	270210	Zfp651	1995.42516663386	-1.65963406120355	0.174898933291178	-9.48910339230332	2.33029939288841e-21	1.20660326353378e-19
ENSMUSG00000013465	58202	Nelfb	387.648855718858	0.188513354350194	0.0903939119975076	2.08546516224889	0.0370270972726819	0.0815490456979192
ENSMUSG00000013483	170720	Card14	40.6795599695528	1.72799291444183	0.545852585043598	3.16567689114051	0.00154722554289104	0.00499925117401983
ENSMUSG00000013495	72392	Tmem175	81.3064618659774	-0.0136482868590283	0.175136883406508	-0.0779292550693013	0.937884327988427	0.961444572013406
ENSMUSG00000013523	76960	Bcas1	13.3950968019599	-0.655555929907442	0.564438138517116	-1.16143096146853	0.245466683946353	0.377196139196663
ENSMUSG00000013539	27883	Tango2	391.866025909637	-0.856251338052404	0.150383982903621	-5.69376685947443	1.24266742787149e-08	1.09206355452349e-07
ENSMUSG00000013562	NA	4833413E03Rik	0.0911051269027903	-0.873502093827236	4.32794324778021	-0.201828453798523	0.840050836358321	NA
ENSMUSG00000013584	19378	Aldh1a2	100.426892830953	0.961481027559195	0.340287054718616	2.82549986614755	0.00472069077217517	0.0135587450080817
ENSMUSG00000013593	226646	Ndufs2	8715.77084059009	-0.569485316388946	0.105813136678419	-5.38199068911162	7.36665762407989e-08	5.69865166355249e-07
ENSMUSG00000013611	66696	Snx31	0.0362982788231126	0	4.32794324778021	0	1	NA
ENSMUSG00000013622	381629	Atraid	365.853127699188	0.300841364730235	0.130920113837897	2.29790026842424	0.0215674660174758	0.051299900702694
ENSMUSG00000013629	69719	Cad	241.49363588403	0.578479128263008	0.226980848273883	2.54858122463704	0.0108162095960861	0.0281867030040646
ENSMUSG00000013643	70163	Lypd8	0	NA	NA	NA	NA	NA
ENSMUSG00000013646	79566	Sh3bp5l	291.491366626669	-0.0947075423859294	0.104647314731242	-0.905016460567187	0.365456666868222	0.508493152619055
ENSMUSG00000013653	69864	1810065E05Rik	0	NA	NA	NA	NA	NA
ENSMUSG00000013662	67979	Atad1	843.992719447592	-0.674208642982284	0.122895669965655	-5.48602439101963	4.11080162000499e-08	3.31437401350011e-07
ENSMUSG00000013663	19211	Pten	644.883758932627	-0.477509304543329	0.0983347781909586	-4.85595547504101	1.1980762241518e-06	7.37674180678823e-06
ENSMUSG00000013668	233918	4933402N03Rik	0	NA	NA	NA	NA	NA
ENSMUSG00000013698	18611	Pea15a	932.303804514823	0.806623800630783	0.107303007972878	7.51725245982542	5.59393354706837e-14	1.11166617683689e-12
ENSMUSG00000013701	53600	Timm23	1497.93868352692	-0.74474292220326	0.144175360914444	-5.1655353416816	2.39751719882579e-07	1.67541656267894e-06
ENSMUSG00000013707	69769	Tnfaip8l2	70.0015358456879	3.06744217418837	0.278624019866198	11.009252453042	3.44853143264081e-28	3.94818532021455e-26
ENSMUSG00000013736	70047	Trnt1	247.985297604384	-0.255689300180838	0.113307206429654	-2.25660227833419	0.0240329378838808	0.0563576222019816
ENSMUSG00000013766	70274	Ly6g6e	1.28348700781276	-3.15823395032325	1.51925749371448	-2.07880096915079	0.0376356477893182	0.0825628517822301
ENSMUSG00000013787	110147	Ehmt2	778.210630793161	0.358635478120893	0.0949822439247132	3.77581601888835	0.000159484680492511	0.000646568276339595
ENSMUSG00000013822	66126	Elof1	287.675220806849	0.0484345705673231	0.138593301009455	0.349472667254089	0.726734487199067	0.820096183640656
ENSMUSG00000013833	216154	Med16	418.05356150858	-0.160658706162314	0.104773886869636	-1.53338499660905	0.12518102322687	0.222275592508991
ENSMUSG00000013846	20442	St3gal1	459.013144126878	0.361617986234597	0.192529952980436	1.87824273904717	0.0603479658896644	0.12196242826853
ENSMUSG00000013858	216157	Tmem259	1317.61269458191	-0.0463430479083529	0.0969588725022614	-0.477966035622702	0.632674379264386	0.747857841452361
ENSMUSG00000013878	77733	Rnf170	286.689711158728	-0.752730128194823	0.126666688286617	-5.94260526091571	2.8052740133725e-09	2.72951307212372e-08
ENSMUSG00000013921	76686	Clip3	91.6631849387265	0.633430169487831	0.250942371320908	2.52420572163078	0.0115960046683228	0.0299724650952962
ENSMUSG00000013928	108167416	1700020L13Rik	0.487052090162526	-0.794675989599904	2.00819987061462	-0.395715586495227	0.692314855799081	NA
ENSMUSG00000013936	17906	Myl2	872.958541958413	-1.14588476812789	0.666216050345479	-1.71998973536238	0.0854343074429361	0.163187525051814
ENSMUSG00000013973	21945	Dedd	31.5953963837803	-0.615487040970752	0.274098204806674	-2.24549825638174	0.0247361640452769	0.0577111817779992
ENSMUSG00000013974	69189	Mcemp1	4.79951003643988	2.928447417044	1.12167744585363	2.61077498515215	0.00903373115390084	0.0241305420116123
ENSMUSG00000013997	27045	Nit1	283.52141620219	-0.209588732327178	0.12704773216536	-1.64968495505599	0.0990073889117182	0.183935206860065
ENSMUSG00000014030	18507	Pax5	1.82651006769358	0.612199566682647	1.11836472449775	0.547406005637007	0.584099830218147	0.708900429984428
ENSMUSG00000014039	114604	Prdm15	86.2386147402112	-0.688688587588133	0.199458645286197	-3.45278885555428	0.000554823099154503	0.00200021392091614
ENSMUSG00000014074	70238	Rnf168	228.327280930331	0.0965873630765461	0.117785162869777	0.820029965771945	0.412199024712475	0.555596828278861
ENSMUSG00000014075	66061	Dynlt2b	67.2233144910315	0.578765687962626	0.195718323265907	2.95713594059512	0.00310511187690087	0.00930765753587974
ENSMUSG00000014077	56398	Chp1	1085.8906730685	-0.462806473169312	0.100093895014733	-4.62372328603251	3.76912602737574e-06	2.12747601128894e-05
ENSMUSG00000014104	84543	Sval2	0	NA	NA	NA	NA	NA
ENSMUSG00000014158	63873	Trpv4	54.4535917138494	0.27292493309571	0.236897604189555	1.15207975204902	0.249288302683664	0.381390745486632
ENSMUSG00000014164	100503085	Klhl3	25.5023847647275	0.0719770101374868	0.29243750360581	0.246127836717236	0.805583275173952	0.875004487154631
ENSMUSG00000014177	67510	Tvp23b	96.9506517896824	0.511342045952551	0.149951439457375	3.41005093250809	0.000649507487358564	0.00229589198962012
ENSMUSG00000014195	56354	Dnajc7	817.267730625253	0.0982823008597073	0.0739883812664364	1.32834776457383	0.184063247206065	0.301284781447386
ENSMUSG00000014198	278304	Zfp385c	6.72889326753646	0.62590252704713	0.545182829913754	1.14805986671691	0.250943850497261	0.383461104309982
ENSMUSG00000014226	12301	Cacybp	790.929009207856	-0.199312578853446	0.100785016729432	-1.97760128758546	0.0479737039082527	0.101088148276204
ENSMUSG00000014232	76779	Cluap1	50.7435430707733	0.451937827729695	0.221440445997182	2.04090009706468	0.0412607581757074	0.0891208158982263
ENSMUSG00000014243	69747	Zswim7	257.751338640106	-0.618358060086094	0.140306229603576	-4.40720317147155	1.04713956610839e-05	5.40026330789832e-05
ENSMUSG00000014245	327942	Pigl	31.8244764248884	-0.303705786420951	0.272882473936515	-1.11295453328236	0.265727957111984	0.400535528098578
ENSMUSG00000014294	17991	Ndufa2	1795.16694465605	-0.0119223207251269	0.159806363953452	-0.0746047931395251	0.940529160380405	0.963031881057799
ENSMUSG00000014301	66449	Pam16	204.127999567385	-0.245482008615235	0.162677033038023	-1.50901454268507	0.13129506642142	0.230628088033808
ENSMUSG00000014303	83396	Glis2	143.343596514591	0.727972400419193	0.145807095278556	4.99270902440271	5.95382221250312e-07	3.87543803396286e-06
ENSMUSG00000014313	12864	Cox6c	4407.32763280871	-0.420288594903102	0.156838693602423	-2.67975067408117	0.00736770149342731	0.0201691807088935
ENSMUSG00000014329	83675	Bicc1	335.713932083121	0.949692264700779	0.131056354735947	7.24644193419101	4.27862481684866e-13	7.5362307885143e-12
ENSMUSG00000014349	268470	Ube2z	578.220922220335	0.309664965134299	0.117160962411286	2.64307290381621	0.00821573432639556	0.0222133105481973
ENSMUSG00000014351	14607	Gip	0	NA	NA	NA	NA	NA
ENSMUSG00000014353	72477	Tmem87b	278.844997589901	-0.0327549497312152	0.143199011615617	-0.228737261253855	0.81907313215414	0.88506858599274
ENSMUSG00000014355	17222	Anapc1	492.701970607185	-0.190120529113215	0.134664419547052	-1.41180966548322	0.158006011743448	0.267338907225695
ENSMUSG00000014361	17289	Mertk	130.044990672173	1.1320823211572	0.204518379109477	5.53535738981781	3.10594366310956e-08	2.5582448844669e-07
ENSMUSG00000014402	22088	Tsg101	588.141240816466	-0.0856503900117467	0.0878240552517659	-0.975249773723293	0.329436377926394	0.470447292378014
ENSMUSG00000014418	246694	Hps5	249.639089276068	-0.0736050717471122	0.110117629764301	-0.668422230887629	0.503864108795978	0.639622493166657
ENSMUSG00000014426	26407	Map3k4	539.388537183799	-1.09886147209451	0.119223269629707	-9.21683724584506	3.05992490482113e-20	1.37984534876486e-18
ENSMUSG00000014444	234839	Piezo1	443.423120281133	-0.236636522676897	0.332340707440796	-0.712029905993541	0.476446257249259	0.614854059076506
ENSMUSG00000014453	12143	Blk	0.987635664392127	0.512115122983482	1.76517341143717	0.290121706833623	0.771723129971181	0.851100838191486
ENSMUSG00000014470	68718	Rnf166	526.812861245603	-0.356007411517047	0.113013665660447	-3.15012710574917	0.00163199443522426	0.00524028378328165
ENSMUSG00000014496	105522	Ankrd28	781.046223425546	-0.786874391116894	0.127003139336221	-6.19570819453344	5.80235384276063e-10	6.28679852742435e-09
ENSMUSG00000014498	237615	Ankrd52	879.803831028207	-0.941295731214699	0.241399774435637	-3.89932315974749	9.64619592917151e-05	0.000409789333556723
ENSMUSG00000014503	53871	Pkd2l2	50.8286923826552	-0.0307088388583939	0.203187776983373	-0.151135266669642	0.879869013237616	0.925119419632694
ENSMUSG00000014504	66384	Srp19	436.81279012966	-0.0011575279952583	0.103375733296069	-0.0111972893284648	0.991066042411239	0.995119502646347
ENSMUSG00000014529	75010	Tmbim7	0	NA	NA	NA	NA	NA
ENSMUSG00000014542	51811	Clec4f	0.134568162496515	0	4.32794324777633	0	1	NA
ENSMUSG00000014543	170733	Klra17	0.71514453456393	2.225539608295	1.75771678869634	1.26615369586681	0.205458061574277	NA
ENSMUSG00000014547	268752	Wdfy2	230.165868543321	0.213367688532959	0.177377553078996	1.20290129629837	0.22901451865874	0.357742205651729
ENSMUSG00000014550	78287	Rbsn	275.473734623583	-0.555423511052173	0.131917961560051	-4.21037063098747	2.54952084074308e-05	0.000122102081073747
ENSMUSG00000014551	64658	Mrps25	267.721230646515	0.0136650688612237	0.146852607597813	0.0930529534664335	0.925861492892801	0.955185092821909
ENSMUSG00000014554	27369	Dguok	219.383510752581	0.174067996139303	0.119596608192298	1.45545930415871	0.145542148729955	0.250173709319118
ENSMUSG00000014592	100072	Camta1	428.850411892474	-0.775012606404205	0.141892620084461	-5.46196557610172	4.70891405184566e-08	3.76274915782999e-07
ENSMUSG00000014599	12977	Csf1	430.511710072552	1.07700834923916	0.248461762757308	4.3347046132453	1.45955974984233e-05	7.33982609193526e-05
ENSMUSG00000014601	229707	Strip1	395.058659556233	-0.181487519327015	0.0888319838447147	-2.04304251095269	0.0410482300559851	0.0886989540729518
ENSMUSG00000014602	16560	Kif1a	23.2116666505583	-1.83958752502436	0.423582340523687	-4.34292780655121	1.40596345727271e-05	7.08586327402203e-05
ENSMUSG00000014603	11694	Alx3	0	NA	NA	NA	NA	NA
ENSMUSG00000014606	67863	Slc25a11	2980.81011477538	-0.586603667530029	0.153255155288333	-3.82762763462278	0.000129384295595825	0.000533932455775791
ENSMUSG00000014609	11448	Chrne	181.230328115538	-0.127550226452987	0.162406529484103	-0.785376221375828	0.432233018204866	0.574267167762613
ENSMUSG00000014633	66531	Cmc2	253.848652167366	-0.26436591360259	0.177314996261253	-1.49093939698748	0.135977406659777	0.236954371422685
ENSMUSG00000014668	231600	Chfr	220.001749293155	-0.212547304753097	0.109515670402601	-1.94079353184555	0.0522833258905804	0.108559675562023
ENSMUSG00000014686	330483	Ceacam16	0.915545805456906	3.29423363989177	2.05538921526183	1.60272984573003	0.108994311233093	0.199021333146517
ENSMUSG00000014704	15399	Hoxa2	7.28264489592128	1.10328847148519	0.54838910343545	2.01187161556184	0.0442334722071518	0.0944919037260272
ENSMUSG00000014725	13522	Adam28	0	NA	NA	NA	NA	NA
ENSMUSG00000014747	75305	Ankrd53	0.698045753500108	1.51294622063171	1.86644928157684	0.810601303536908	0.417594668043313	NA
ENSMUSG00000014748	21766	Tex261	880.674965857933	-0.185829918712544	0.073932417649918	-2.51351064417343	0.0119536170656705	0.0307732842585056
ENSMUSG00000014763	67544	Fam120b	244.565339375172	-0.589183931788828	0.152655746661914	-3.85955946416936	0.000113591614670599	0.000475308831498823
ENSMUSG00000014767	21374	Tbp	108.017583040309	0.018808087031237	0.151678892663019	0.123999369332306	0.901315774409744	0.93920848952716
ENSMUSG00000014769	19170	Psmb1	1303.82424484529	0.287073063563908	0.0908835956911867	3.15868954546378	0.00158480214728591	0.0051052957413351
ENSMUSG00000014771	18567	Pdcd2	0	NA	NA	NA	NA	NA
ENSMUSG00000014773	13388	Dll1	121.641373198169	0.20484195948679	0.229642901622703	0.892002139144452	0.372391785817078	0.515569346723945
ENSMUSG00000014776	78688	Nol3	863.408453009113	0.405409807204369	0.116568493623193	3.47786777201441	0.000505419180650434	0.00184120178095177
ENSMUSG00000014778	234686	Fhod1	812.13536445257	-0.338869038359416	0.120247647437462	-2.81809287400532	0.00483098337981738	0.0138416867300418
ENSMUSG00000014782	102075	Plekhg4	10.4626087518063	1.0833545413793	0.481352176476623	2.25064847386624	0.0244078106598821	0.0570937754913565
ENSMUSG00000014786	277973	Slc9a5	52.355514508251	0.163176229776065	0.224956140151316	0.725369086019634	0.468225632979159	0.607670120563921
ENSMUSG00000014791	234683	Elmo3	37.2174597385015	0.580983006039265	0.26119014784408	2.22436799716538	0.0261236952042502	0.0604081138654834
ENSMUSG00000014813	20855	Stc1	21.6919328021998	-0.115901252149944	0.508047644954474	-0.228130674949452	0.819544653612224	0.885316151472491
ENSMUSG00000014837	74356	Matcap1	17.7783718899305	1.23041748683436	0.382275552437825	3.21866642788904	0.00128788209365903	0.00424379184300053
ENSMUSG00000014846	67971	Tppp3	1157.7177035332	0.740551957633747	0.175447592282437	4.22092972607798	2.43296780709098e-05	0.000117071331445641
ENSMUSG00000014850	17686	Msh3	148.311937761675	-0.485640281909723	0.154192077468415	-3.14957999063994	0.00163505340837725	0.00524847050464773
ENSMUSG00000014852	279028	Adamts13	0.316442025666853	0.569166551636022	2.36701194798178	0.240457827904637	0.809975352709942	NA
ENSMUSG00000014856	66320	Tmem208	210.18881625186	0.499227806162296	0.13308221508866	3.75127364561603	0.000175938548234886	0.000705946573602909
ENSMUSG00000014859	104394	E2f4	424.083953993643	-0.139947554362751	0.195405607037263	-0.716190064781833	0.473873996960522	0.612425104455384
ENSMUSG00000014867	20932	Surf4	1785.57713017324	0.229633394581271	0.13178844495347	1.74243951859624	0.0814315659461033	0.156879658877937
ENSMUSG00000014873	20931	Surf2	110.525937679499	0.167019580467457	0.135156634166273	1.23574829676497	0.216552139012084	0.342468458350167
ENSMUSG00000014905	27362	Dnajb9	493.682022735727	-0.275777517953259	0.206329234828445	-1.33658964122345	0.181356622164017	0.297800525856603
ENSMUSG00000014907	234344	Naf1	87.2357778363114	0.141397710756889	0.223777424504897	0.631867629497161	0.527473377127806	0.659670138397409
ENSMUSG00000014932	22612	Yes1	159.388515578655	0.0772581307707766	0.146081199207059	0.528871142831111	0.596894841490553	0.719135275851349
ENSMUSG00000014956	19046	Ppp1cb	4299.00534211803	-0.904323048299812	0.141518281445981	-6.39015001496469	1.65723091867032e-10	1.97640131782164e-09
ENSMUSG00000014959	70231	Gorasp2	1008.26818219878	-0.172134072577504	0.106019244943472	-1.6236115685344	0.104458734893605	0.192238400490036
ENSMUSG00000014980	66637	Tsen15	184.097394755614	0.0751317659314149	0.131397293458168	0.571790818167301	0.56746369848997	0.694270476043773
ENSMUSG00000015001	18256	Oc90	0.0500487832089931	-0.873495337950308	4.32794324778021	-0.201826892808338	0.840052056737723	NA
ENSMUSG00000015002	76740	Efr3a	584.922765505301	-0.194820647632722	0.0672430911452682	-2.89725894979816	0.00376438898252441	0.0110712898746772
ENSMUSG00000015013	59005	Trappc2l	275.682670956317	0.312513475006696	0.16903140371886	1.84884860523599	0.0644796766616885	0.128946839072691
ENSMUSG00000015016	257633	Acsf3	185.651072992528	0.0666065874721268	0.156729045347441	0.424979220185203	0.670851822954321	0.778123170340668
ENSMUSG00000015023	13680	Ddx19a	319.248128821989	-0.348856463551444	0.105951309943667	-3.29261114125845	0.000992616569228235	0.00336777119832984
ENSMUSG00000015027	50917	Galns	80.0148913656448	2.51511665606357	0.266351874083087	9.44283446370267	3.62828998603495e-21	1.80608212638184e-19
ENSMUSG00000015053	14461	Gata2	117.676140641653	-0.699556495759833	0.161072140672995	-4.34312534021669	1.40469937297879e-05	7.0828215765217e-05
ENSMUSG00000015083	69379	C8g	25.4807900833886	-0.409536286723683	0.294827775236682	-1.38906955559026	0.164811600339451	0.276178033810001
ENSMUSG00000015085	12496	Entpd2	156.786602517181	0.881794965269383	0.179943673757337	4.90039436706471	9.56444719122676e-07	6.00561022903111e-06
ENSMUSG00000015087	227624	Rabl6	1563.34322424995	-0.826538152311531	0.0808229310694868	-10.2265302850861	1.50826695506034e-24	1.17291944942956e-22
ENSMUSG00000015090	19215	Ptgds	7.39894093358429	6.37093788296571	1.27366531890478	5.00205021554959	5.67238096829863e-07	3.70629128074503e-06
ENSMUSG00000015092	59022	Edf1	1521.94506972367	0.143179643999077	0.121079000352512	1.18253077397584	0.2369951622175	0.367715427117771
ENSMUSG00000015093	69454	Clic3	7.27072420592092	-0.0603797543827363	0.529215118872181	-0.11409302612407	0.909164050472182	0.944500315175214
ENSMUSG00000015094	18146	Npdc1	394.540161293348	1.20024969918365	0.139256238786637	8.61900127162441	6.75406054721042e-18	2.3120877036032e-16
ENSMUSG00000015095	30839	Fbxw5	937.887459254412	-0.766796824379593	0.0954223300351185	-8.03582163731893	9.2953881217999e-16	2.35330907142571e-14
ENSMUSG00000015112	50799	Slc25a13	23.5599543625541	0.567636375542972	0.39824836072112	1.4253326103217	0.154061077899237	0.261997911647753
ENSMUSG00000015120	22196	Ube2i	522.445912121979	0.472677241358031	0.138032203324329	3.42439829238543	0.00061616243447526	0.00219155599752609
ENSMUSG00000015126	68327	Tsr3	144.071397515396	-0.0371400002680045	0.135222777748043	-0.274657871155453	0.783579100674127	0.859256005251551
ENSMUSG00000015127	74154	Unkl	37.4770358867528	-1.11495184208807	0.363601953603147	-3.06640773252	0.00216647661649263	0.00674931974492519
ENSMUSG00000015133	233328	Lrrk1	202.094687065723	0.806852279920406	0.145336163478292	5.55162776153041	2.83021753155934e-08	2.34897796578232e-07
ENSMUSG00000015134	56847	Aldh1a3	59.1870936376175	1.09300274799285	0.275274263560711	3.97059548486193	7.16932156444894e-05	0.00031335181081689
ENSMUSG00000015143	109711	Actn1	421.641162606099	1.35296077345345	0.167550590725504	8.0749388444114	6.75104728096667e-16	1.75000732536052e-14
ENSMUSG00000015149	64383	Sirt2	1145.09922580801	-0.591633385421114	0.0944954844127536	-6.26096991933367	3.82590328480226e-10	4.30137560792171e-09
ENSMUSG00000015165	15388	Hnrnpl	1369.40898815059	0.455992581211246	0.124821706034273	3.65315132839189	0.000259041461017031	0.00100818251721227
ENSMUSG00000015176	70769	Nolc1	420.453805591256	-0.0890933662636683	0.182929785142709	-0.487035865669245	0.626232914513572	0.74284279642524
ENSMUSG00000015189	213819	Casd1	358.020367224565	-0.267714536790781	0.111636338546812	-2.39809492389005	0.0164805937286792	0.0406209873891425
ENSMUSG00000015202	215748	Cnksr3	80.8375499827066	0.29103658340562	0.220732692787705	1.3185023918751	0.187335524888783	0.305205694872423
ENSMUSG00000015214	53332	Mtmr1	414.135769048039	-0.867922185898325	0.114249820376418	-7.59670503672379	3.03765842248876e-14	6.26000647706484e-13
ENSMUSG00000015217	15354	Hmgb3	123.069582412869	0.228019219727016	0.220189351984466	1.03555970201094	0.300407600272086	0.438535087228671
ENSMUSG00000015222	17756	Map2	25.5662769614839	0.161415906714617	0.282574306490828	0.57123348799533	0.567841380803079	0.694678345105867
ENSMUSG00000015224	74519	Cyp2j9	23.7175679358951	-0.0471128873644501	0.29468116281604	-0.159877499173102	0.872977573562552	0.921163432461704
ENSMUSG00000015242	73398	Nipsnap3a	0	NA	NA	NA	NA	NA
ENSMUSG00000015243	11303	Abca1	410.040523882079	1.36015008527456	0.288105530098937	4.72101345922613	2.34672407830471e-06	1.37978002298726e-05
ENSMUSG00000015247	66536	Nipsnap3b	75.7151723175904	1.49283934333359	0.228026502529104	6.54677998730893	5.87908749266624e-11	7.53928033907068e-10
ENSMUSG00000015289	66192	Lage3	260.269617110061	0.0609725203665693	0.160161519441191	0.380693943085109	0.703430363768919	0.802363034070398
ENSMUSG00000015290	27643	Ubl4a	855.695858053992	-0.482733715273066	0.0832016287034471	-5.8019743458828	6.55385909269909e-09	6.00275236365968e-08
ENSMUSG00000015290	100169864	Ubl4a	855.695858053992	-0.482733715273066	0.0832016287034471	-5.8019743458828	6.55385909269909e-09	6.00275236365968e-08
ENSMUSG00000015291	14567	Gdi1	712.616982632392	0.352537575200936	0.089487701794195	3.93950864903991	8.16486586984098e-05	0.000352454034029499
ENSMUSG00000015305	70097	Sash1	448.509306076093	0.0939580326601701	0.122733507262669	0.765545080196276	0.443947033264114	0.584928103158805
ENSMUSG00000015312	17873	Gadd45b	370.409663311187	-0.21636939297583	0.205057298922298	-1.05516552745493	0.291349627187589	0.42883602007584
ENSMUSG00000015314	30925	Slamf6	2.67972812020754	3.50213574656411	1.33338554921347	2.62649895120728	0.00862682583434377	0.0231788300905028
ENSMUSG00000015316	27218	Slamf1	0.822677544163049	2.59082750801726	1.69519719546305	1.52833399851724	0.126429632737459	0.223913876886693
ENSMUSG00000015335	66220	Zdhhc12	45.650080003862	1.17322485259054	0.24606527238139	4.76794161661338	1.86117698082709e-06	1.11174304988071e-05
ENSMUSG00000015337	13804	Endog	411.693068030044	-0.677711999471114	0.180369762261702	-3.75734818837211	0.000171723480974287	0.000690917121420951
ENSMUSG00000015340	13058	Cybb	405.484216489095	3.67349202859287	0.288658985083309	12.726061610494	4.23676893052208e-37	1.1798828935162e-34
ENSMUSG00000015341	57437	Golga7	351.048630245834	0.422060762490647	0.109870908787816	3.84142415082535	0.000122322535638325	0.000507411999684902
ENSMUSG00000015341	628040	Golga7	351.048630245834	0.422060762490647	0.109870908787816	3.84142415082535	0.000122322535638325	0.000507411999684902
ENSMUSG00000015342	22439	Xk	85.0764879692733	-1.65411101340676	0.27215087070168	-6.07791924068442	1.21752042340221e-09	1.25015749304797e-08
ENSMUSG00000015354	76477	Pcolce2	177.271493399831	-0.511097472309848	0.156382702422393	-3.26824811435578	0.00108215453535636	0.00363972349240892
ENSMUSG00000015355	12506	Cd48	77.1439862673977	3.15662049458813	0.303219526588535	10.4103470185534	2.22409433592622e-25	1.91774627927898e-23
ENSMUSG00000015357	270166	Clpx	834.590734266169	-0.288937600977144	0.121590204763848	-2.37632300676125	0.0174861481568569	0.0427568273868661
ENSMUSG00000015363	67976	Trabd	513.372851240007	-0.198062558829221	0.103578708588692	-1.91219374645537	0.0558513479282359	0.114514434196108
ENSMUSG00000015365	83456	Mov10l1	1.12815127488209	3.12362582029145	1.68335939100456	1.85559057500336	0.0635119381120177	0.127370937562677
ENSMUSG00000015377	69440	Dennd6b	202.936328951626	-0.467888334013745	0.123657081173179	-3.78375689911748	0.000154478715864612	0.0006281565462782
ENSMUSG00000015396	12522	Cd83	83.861604811763	2.25509318690974	0.327160369789149	6.89292895824493	5.46551736581706e-12	8.17368518684746e-11
ENSMUSG00000015401	57394	Cltrn	0.590066517667979	2.60177266004446	2.40855808472421	1.08022001900044	0.280044215817479	NA
ENSMUSG00000015405	70008	Ace2	9.15451951086009	-2.22546143781628	0.516242745848554	-4.31088176194759	1.62604839106248e-05	8.10977861641231e-05
ENSMUSG00000015437	14939	Gzmb	2.80570434054472	3.99746632698635	1.26491747707431	3.16025859349519	0.00157629168949234	0.00508121682106339
ENSMUSG00000015441	14943	Gzmf	0	NA	NA	NA	NA	NA
ENSMUSG00000015443	245839	Gzmn	0.0493838546533454	0	4.32794324778021	0	1	NA
ENSMUSG00000015451	625018	C4a	5.80885660595803	0.0819769210289717	0.602989762458223	0.135950767546657	0.891860201305788	0.933204114166523
ENSMUSG00000015452	11596	Ager	6.21696080638041	1.10992649561633	0.574277949137313	1.93273396146182	0.053268979239574	0.110173336428055
ENSMUSG00000015461	12915	Atf6b	245.982733563006	0.692227948045554	0.135412689667838	5.11198728674219	3.18787285807976e-07	2.17896132203342e-06
ENSMUSG00000015467	81701	Egfl8	10.1330630797065	-0.0427573893805156	0.540202840150587	-0.0791506193647493	0.936912821339674	0.960974488461477
ENSMUSG00000015468	18132	Notch4	297.372664044164	0.0332894065059566	0.13513249105893	0.246346428198673	0.805414072561167	0.874866814639497
ENSMUSG00000015474	54397	Ppt2	138.325838267736	-0.240330720662789	0.142551808276834	-1.68591842901122	0.0918115118044826	0.172916435319574
ENSMUSG00000015476	260297	Prrt1	20.5843146007398	0.234007088518657	0.380127825615259	0.615601049830813	0.538157858226848	0.669505411550793
ENSMUSG00000015478	54197	Rnf5	208.956266006012	-0.0847041006248764	0.123791053109602	-0.684250585944051	0.493816944146939	0.630714569877913
ENSMUSG00000015484	329274	Fam163a	0.212355942926838	-0.873512861095001	3.36044436217437	-0.259939688610049	0.794910296161363	NA
ENSMUSG00000015488	381356	Cacfd1	507.465721553873	-0.347357918856635	0.106927132529393	-3.24854796570132	0.00115995650301588	0.00387240946284646
ENSMUSG00000015501	15273	Hivep2	550.950020632297	-0.733391679494297	0.162006051977314	-4.52694001577791	5.9843917805929e-06	3.2411654616152e-05
ENSMUSG00000015519	67719	2310057J18Rik	0	NA	NA	NA	NA	NA
ENSMUSG00000015522	11863	Arnt	609.37035477787	-0.305432192976866	0.132783482020454	-2.30022731991482	0.0214353448099594	0.0510327617656705
ENSMUSG00000015533	16398	Itga2	31.5520080876186	-0.294815355503751	0.323797474883362	-0.910493065487769	0.362562537175786	0.505732284155854
ENSMUSG00000015536	17434	Mocs2	495.612988942842	-0.298614965640707	0.119735910120955	-2.49394659746646	0.0126331549426066	0.0322687252571244
ENSMUSG00000015542	66176	Nat9	149.95154286674	0.190098082878365	0.177206237038985	1.07275051970402	0.28338306675564	0.420821194651506
ENSMUSG00000015568	16956	Lpl	5561.56450182438	-0.836941216449068	0.215584670588559	-3.88219261677636	0.00010351882726926	0.00043663466226805
ENSMUSG00000015575	11974	Atp6v0e	445.392425115648	1.18370676206889	0.167797397405176	7.05438094019194	1.73370821437383e-12	2.80002028854357e-11
ENSMUSG00000015579	18091	Nkx2-5	0.102851674950251	0	4.32794324778021	0	1	NA
ENSMUSG00000015597	57908	Zfp318	176.613646842532	0.00921412284222446	0.156522345495843	0.0588677789936974	0.953057422165411	0.970865415520751
ENSMUSG00000015599	106763	Ttbk1	7.16192830051738	-0.793948738238369	0.594291793396648	-1.33595776865871	0.181563077209009	0.29809208852161
ENSMUSG00000015605	20807	Srf	1185.58130935786	-0.805230978641692	0.100047325050972	-8.048500829297	8.38143416238984e-16	2.14032955661128e-14
ENSMUSG00000015619	14462	Gata3	5.78005881613667	-0.0387517784842687	0.581894306005251	-0.0665959059649554	0.946903405078646	0.966708333087551
ENSMUSG00000015627	14464	Gata5	0	NA	NA	NA	NA	NA
ENSMUSG00000015647	16776	Lama5	519.993634453063	-0.344592194337574	0.211254758612642	-1.63116890999564	0.102854683508672	0.189794888766719
ENSMUSG00000015652	70358	Steap1	7.41942104951955	3.17490469610389	0.890357166356774	3.56587762312869	0.000362640574491174	0.00136299415632211
ENSMUSG00000015653	74051	Steap2	37.3750706406038	1.07812741052836	0.338604865290265	3.18402811372528	0.00145240905483025	0.00472474282587875
ENSMUSG00000015656	15481	Hspa8	13396.3301423122	-0.191133701058641	0.132137492738466	-1.44647591760307	0.14804376190376	0.253690823658132
ENSMUSG00000015659	321007	Serac1	90.7183571397018	-1.10492260941696	0.236292645233791	-4.67607702441917	2.92414813203449e-06	1.68892501975803e-05
ENSMUSG00000015665	245533	Awat1	0	NA	NA	NA	NA	NA
ENSMUSG00000015668	72621	Pdzd11	110.011201372443	0.928885966896588	0.194390399902735	4.77845596984914	1.76646433917962e-06	1.05915906609874e-05
ENSMUSG00000015671	19166	Psma2	1118.40948626934	0.0995663981979293	0.0872766461388921	1.14081375262151	0.253947436345541	0.387024757299875
ENSMUSG00000015672	75398	Mrpl32	266.949672667564	-0.148728937173534	0.13267250070609	-1.12102309357245	0.262278032503664	0.396640910973472
ENSMUSG00000015697	84505	Setdb1	256.641006218472	-0.0159249544339309	0.119906902582173	-0.132810989951286	0.894342862635553	0.934710300902398
ENSMUSG00000015702	71790	Anxa9	10.3719002914609	2.11771262767532	0.484323189439579	4.37251957752791	1.22820799387688e-05	6.26196990884838e-05
ENSMUSG00000015709	11864	Arnt2	43.8217760435371	-1.1409773148249	0.322495544624419	-3.53796303187288	0.000403226508816996	0.00150157063492964
ENSMUSG00000015711	229589	Prune1	889.517649521436	-0.621916522987026	0.158958982084138	-3.91243398034494	9.13705217548417e-05	0.000390494341004516
ENSMUSG00000015714	76893	Cers2	481.980719620636	0.62071880310859	0.141113596141585	4.39871720429971	1.08892609234854e-05	5.60034662119262e-05
ENSMUSG00000015721	23968	Nlrp5	0	NA	NA	NA	NA	NA
ENSMUSG00000015733	12343	Capza2	3335.94064109616	-0.632611024397044	0.0995123971888203	-6.35710767972651	2.05587884131687e-10	2.4113574935605e-09
ENSMUSG00000015745	67220	Plekho1	518.915752138225	1.55425268095197	0.167482847069592	9.28007081409443	1.6936596359443e-20	7.96094872443581e-19
ENSMUSG00000015747	22365	Vps45	125.396890195383	0.405210268219376	0.17003985071795	2.38303119244388	0.0171707393350722	0.0420854657727363
ENSMUSG00000015748	70767	Prpf3	192.027968208601	0.001954391028191	0.123213049736034	0.0158618833993477	0.987344578815244	0.992788342533523
ENSMUSG00000015749	66471	Anp32e	1144.84867183155	-0.420598957122974	0.101252673664248	-4.15395408241439	3.26778777216659e-05	0.000153225416174765
ENSMUSG00000015750	226548	Aph1a	362.17263063415	0.163362870216448	0.093477324042768	1.74762031208452	0.0805297957298794	0.155476675135971
ENSMUSG00000015755	68652	Tab2	1604.79758449095	-1.16689698219567	0.117140020525897	-9.96155692099862	2.24518747653868e-23	1.50223452975679e-21
ENSMUSG00000015757	67418	Ppil4	202.746470738355	-0.265759816504835	0.119012379561385	-2.23304346559813	0.0255460781743921	0.05927863743023
ENSMUSG00000015759	12793	Cnih1	528.868229625432	0.304366069012867	0.130375909899894	2.33452690183766	0.0195681491130296	0.0471925590311661
ENSMUSG00000015766	13860	Eps8	197.712645544173	0.795071149425634	0.230329584495279	3.45188461641987	0.000556685727174804	0.00200562578070251
ENSMUSG00000015776	20933	Med22	251.515225037307	0.190272169239607	0.115164320022611	1.65217985225155	0.0984978924044996	0.183215503806474
ENSMUSG00000015787	80908	Abo	0	NA	NA	NA	NA	NA
ENSMUSG00000015790	20930	Surf1	258.920463286631	0.0194288644292016	0.122338586162938	0.15881223609471	0.873816808155402	0.921723204539572
ENSMUSG00000015804	66999	Med28	404.954588492158	0.0193575062806769	0.12418360982741	0.155878109096522	0.876129100777927	0.922835088619041
ENSMUSG00000015806	110391	Qdpr	248.273716789643	-0.177311575003258	0.112528911812702	-1.57569794417264	0.115095431472426	0.207648139570933
ENSMUSG00000015812	14714	Gnrh1	10.7011835156609	0.225644732389792	0.502817421579037	0.448760768235083	0.653604242468156	0.765120780388211
ENSMUSG00000015829	21960	Tnr	0.562330339552443	2.22863763585959	2.16164372375231	1.03099211556981	0.302544517170778	NA
ENSMUSG00000015837	18412	Sqstm1	7187.67819564085	-0.49521783122505	0.186859437063471	-2.65021579325875	0.00804403739153496	0.0218063039416933
ENSMUSG00000015839	18024	Nfe2l2	575.199946429273	0.246175369764114	0.231521385536573	1.06329430084214	0.287648508896076	0.4249971659973
ENSMUSG00000015843	20183	Rxrg	615.369835507328	-0.865743762120773	0.163079293738355	-5.30872891508701	1.10392376747125e-07	8.27561331394965e-07
ENSMUSG00000015846	20181	Rxra	1885.59858124922	-1.26030703933739	0.145355528459019	-8.67051327664304	4.30176788751649e-18	1.51799370934828e-16
ENSMUSG00000015850	229595	Adamtsl4	285.424357581712	-0.791902050349509	0.164566235672227	-4.81205665982888	1.49384985973182e-06	9.03058313562728e-06
ENSMUSG00000015852	80891	Fcrls	243.118395899023	2.5907538070865	0.279987969253241	9.25308974523558	2.18095177281385e-20	1.01000121649771e-18
ENSMUSG00000015854	11801	Cd5l	6.36353128187042	5.55232383308446	1.23649248780054	4.49038218013026	7.10954928217509e-06	3.79296398473828e-05
ENSMUSG00000015869	67763	Prpsap1	181.659997818445	0.564138020130799	0.148135792647468	3.8082492424591	0.000139954171113018	0.000573280770879959
ENSMUSG00000015879	58227	Fam184b	2.36369225790105	-0.41983523772174	0.883851041257323	-0.475006780695198	0.634782140249763	0.749680122711931
ENSMUSG00000015880	54392	Ncapg	12.9932167710768	6.02246663475802	1.16301308584009	5.17833093030744	2.23879837391686e-07	1.57626091184416e-06
ENSMUSG00000015882	209707	Lcorl	63.1740655749954	0.0496291782944956	0.199295002992133	0.249023696276292	0.803342451706244	0.873260958158154
ENSMUSG00000015882	100041576	Lcorl	63.1740655749954	0.0496291782944956	0.199295002992133	0.249023696276292	0.803342451706244	0.873260958158154
ENSMUSG00000015889	16993	Lta4h	333.457421594679	0.333417896202961	0.101517251164356	3.28434716640582	0.00102218921985294	0.0034595623982147
ENSMUSG00000015890	71761	Amdhd1	0.731201637719556	3.07038687836695	1.66049416191515	1.84908020081546	0.0644462328546184	0.128892465709237
ENSMUSG00000015932	56431	Dstn	648.514871428866	0.493053008788636	0.11699620813497	4.21426486078794	2.50593073399211e-05	0.000120237998989778
ENSMUSG00000015937	26914	Macroh2a1	699.389300175218	-0.341026862376007	0.0830461550476342	-4.10647382988892	4.01744954545548e-05	0.000184555506537553
ENSMUSG00000015942	114674	Gtf2ird2	128.572283212057	-0.437047656269737	0.147441712387731	-2.96420632392292	0.00303464744841105	0.00912697236089536
ENSMUSG00000015943	69168	Bola1	231.675390196165	-0.0707161185597751	0.174412385950711	-0.40545353573547	0.685144165828839	0.788487796359005
ENSMUSG00000015944	80909	Castor2	1246.94035521384	-0.310532981254406	0.137248159309654	-2.2625657263191	0.0236624729062105	0.0555964247692607
ENSMUSG00000015947	14129	Fcgr1	139.720655504281	4.08729778051842	0.281762500228801	14.5061808338561	1.10715647061389e-47	7.36009049884224e-45
ENSMUSG00000015950	17969	Ncf1	167.5189748483	3.29677938131976	0.278074546482006	11.8557394879473	2.00942369621449e-32	3.60088726361637e-30
ENSMUSG00000015957	22411	Wnt11	137.826812885923	0.0265270300428656	0.203542726403209	0.130326592905692	0.896308041396571	0.936241883374754
ENSMUSG00000015961	11566	Adss	283.117868156754	0.619651710097296	0.176342918781148	3.51390185883404	0.000441575926198039	0.00163140851328239
ENSMUSG00000015962	69428	1700016C15Rik	4.70491530249628	0.10082024120563	0.637805891829548	0.158073549487645	0.874398842992799	0.922010463400841
ENSMUSG00000015966	50905	Il17rb	1.61077064661347	0.325478040642002	1.01789581902552	0.319755749614531	0.749153494491877	0.836415387067321
ENSMUSG00000015968	12289	Cacna1d	13.9279408087772	2.62792281283221	0.490187314884628	5.36105838122459	8.2735771488504e-08	6.34779887876057e-07
ENSMUSG00000015970	218865	Chdh	13.0134679116754	-1.96122322935159	0.48182466052637	-4.07040857395936	4.6930756680603e-05	0.000212653701335503
ENSMUSG00000015971	56249	Actr8	385.468665335654	-0.346747835812285	0.09867418909429	-3.51406825832583	0.000441299398796432	0.00163067922008192
ENSMUSG00000015980	76612	Lrrc27	37.0701768728108	0.124140053251379	0.31682940823998	0.391819856436276	0.695191322498465	0.796076627672513
ENSMUSG00000015981	57740	Stk32c	13.4689487334585	0.968117992639279	0.447465993411009	2.16355657613078	0.0304983972427532	0.0690292114638833
ENSMUSG00000015994	14272	Fnta	764.633157214389	-0.33706746884032	0.0772964155982313	-4.36071279931423	1.29639434218966e-05	6.58194003543843e-05
ENSMUSG00000016018	72198	Mtrex	451.629903032994	-0.49534797738625	0.118989863411167	-4.16294265062382	3.1417229643809e-05	0.000147650232269011
ENSMUSG00000016024	16803	Lbp	283.815567040045	0.875941182136192	0.144248474051242	6.07244678252214	1.25975853295988e-09	1.29224011185849e-08
ENSMUSG00000016028	12614	Celsr1	6.41171705841432	-0.0286909562656166	0.685615555342661	-0.0418470030938508	0.966620664757448	0.979020550261576
ENSMUSG00000016087	14247	Fli1	188.241168236608	0.354793507089328	0.178450539165603	1.98818960563676	0.0467907241317995	0.0990715342554324
ENSMUSG00000016128	243362	Stard13	132.460386306723	0.00834126805799454	0.170872564522169	0.0488157246385352	0.961066150665015	0.975426439255515
ENSMUSG00000016150	23963	Tenm1	0.0618592807812329	0.569152411104117	4.32794324778021	0.131506440477479	0.895374692057978	NA
ENSMUSG00000016179	215303	Camk1g	4.16651471125421	0.185255786940837	0.673271504467515	0.275157623204853	0.783195142518384	0.859109250919192
ENSMUSG00000016181	215193	Utp25	127.648909604753	-0.0762805177421605	0.144779123011777	-0.526875119529185	0.598280312773743	0.719958745358472
ENSMUSG00000016194	15483	Hsd11b1	116.643825871941	-1.08546355669901	0.236636644472807	-4.58704761943049	4.49558169027831e-06	2.4924656301656e-05
ENSMUSG00000016200	329324	Syt14	4.44548121034211	1.52112870551532	0.742713332607356	2.04806974472273	0.0405531659654605	0.0878225771559699
ENSMUSG00000016206	14991	H2-M3	56.8263144635344	1.53480557607167	0.245528213500497	6.25103548871202	4.07740204219016e-10	4.54692106523024e-09
ENSMUSG00000016239	74365	Lonrf3	12.5596675361669	0.64931392903894	0.452465948618586	1.43505589983367	0.151271168978517	0.258297808460459
ENSMUSG00000016252	67126	Atp5e	4811.19063333039	-0.238412578936668	0.157475674794557	-1.51396448529401	0.130034847231953	0.228804485293381
ENSMUSG00000016253	57314	Nelfcd	383.722740659676	0.188907797923227	0.117641262036228	1.6057954042099	0.108318870765653	0.198068792257195
ENSMUSG00000016255	545486	Tubb1	1.21154712293613	0.0867359062304466	1.29623359246403	0.0669137929573087	0.946650332457444	0.966632149999158
ENSMUSG00000016256	64138	Ctsz	1346.76570307244	2.39033190389328	0.194666972282746	12.2790829685347	1.17320516978216e-34	2.65685847679898e-32
ENSMUSG00000016257	66390	Prelid3b	783.224749347129	-0.323378595605269	0.110285753121863	-2.93218830584532	0.0033658259627905	0.0100061946683766
ENSMUSG00000016262	214791	Sertad4	135.535351247875	1.51935838738156	0.330612378572423	4.59558832594871	4.31529945328743e-06	2.40155795661214e-05
ENSMUSG00000016283	14990	H2-M2	1.86466921160114	4.33180926361991	1.33728309496079	3.23926121547728	0.00119839764635861	0.00398589068692032
ENSMUSG00000016308	22209	Ube2a	369.867983859404	-0.141829172348598	0.100001315413192	-1.41827306733496	0.156111056652823	0.264796699505365
ENSMUSG00000016319	11740	Slc25a5	937.346155972817	1.12698174078361	0.174564502124455	6.45596170509017	1.07533801005338e-10	1.32065349887843e-09
ENSMUSG00000016327	67821	Atp1b4	148.779637026282	1.63939816207055	0.267737448395137	6.12315599441686	9.17397975529892e-10	9.57737460978724e-09
ENSMUSG00000016344	66496	Ppdpf	437.252278578684	0.205665349851763	0.134633046464385	1.52759931720158	0.126612051410159	0.224198415145262
ENSMUSG00000016346	16536	Kcnq2	0.773496228666628	0.154684503491491	1.62652517737153	0.0951012044839429	0.924234441374209	0.954127637354849
ENSMUSG00000016349	13628	Eef1a2	21037.3407282869	-0.505829952931585	0.149752447244946	-3.37777420160763	0.000730750576394996	0.00255685227487621
ENSMUSG00000016356	73368	Col20a1	67.2012551803448	-0.608040526661523	0.200969405337377	-3.02553777098945	0.00248191403079738	0.00763164493385146
ENSMUSG00000016382	102866	Pls3	478.404111865585	0.248521978656959	0.0966796119137513	2.57057277886746	0.0101530490870546	0.0267152752280415
ENSMUSG00000016386	77015	Mpped2	35.9018486380928	-1.25025063641302	0.301445410735062	-4.14751922533614	3.36097254784802e-05	0.00015716569608816
ENSMUSG00000016409	67050	Nkap	166.861304303767	0.203567915594767	0.127456135587571	1.59716058121739	0.110229916964932	0.200761655219914
ENSMUSG00000016427	54405	Ndufa1	1028.89716347379	-0.381278046413191	0.14082947546689	-2.70737390130258	0.00678178289287205	0.0187444986395262
ENSMUSG00000016458	22431	Wt1	0.0994326378623384	-0.873502093827235	4.32794324778021	-0.201828453798523	0.840050836358321	NA
ENSMUSG00000016477	13557	E2f3	259.82839460703	-0.605335469592851	0.11496208110044	-5.26552289066498	1.39790899175679e-07	1.03180904377235e-06
ENSMUSG00000016481	12946	Cr1l	477.989874597647	0.0174964876995511	0.0969289799802003	0.180508323755445	0.856753520316498	0.911320123778751
ENSMUSG00000016487	67533	Ppfibp1	622.354568207735	0.690335951091854	0.149653950690855	4.61288157048326	3.97124598081523e-06	2.22874284239216e-05
ENSMUSG00000016493	17221	Cd46	28.3010185220279	-0.467396641851145	0.281639182103139	-1.65955829853241	0.0970033434081617	0.181023716467934
ENSMUSG00000016494	12490	Cd34	1257.13410567113	0.742965786926327	0.111139300142584	6.6849960902503	2.30930809358277e-11	3.1371273033984e-10
ENSMUSG00000016495	67759	Plgrkt	183.684589891273	0.414813060200206	0.155912553173914	2.6605494667097	0.00780132668561977	0.0212153259880248
ENSMUSG00000016496	60533	Cd274	55.7649879442263	-0.125137187930698	0.250907145267803	-0.498739036694768	0.617963240088535	0.736254058608112
ENSMUSG00000016498	58205	Pdcd1lg2	0.557251111941958	0.87754491333643	1.96079701900062	0.447545005848539	0.654481600127567	NA
ENSMUSG00000016503	66596	Gtf3a	78.2849500589883	-0.280305549535441	0.186965995462383	-1.49923278210148	0.133813253352831	0.234133428858477
ENSMUSG00000016510	76366	Mtif3	122.227149791806	-0.523218687781858	0.176307618494985	-2.96764650471835	0.00300089233041093	0.00903468066400416
ENSMUSG00000016520	140887	Lnx2	104.700435172114	0.244857603233	0.207764689065944	1.17853329328394	0.238584067541926	0.369401988272278
ENSMUSG00000016524	329244	Il19	0.195714054718463	0.527256230906921	3.43346991583885	0.153563667028113	0.877953786571357	NA
ENSMUSG00000016526	226419	Dyrk3	4.54157766047557	4.442665657595	1.14677530611248	3.8740506827405	0.00010704113608758	0.000450184435202624
ENSMUSG00000016528	17164	Mapkapk2	3786.86092900393	-0.893212277894177	0.12134432620469	-7.36097274451434	1.82574845674353e-13	3.39269830446985e-12
ENSMUSG00000016529	16153	Il10	3.83496973857143	3.76602529641003	1.32187444622356	2.84900378184111	0.00438563591543788	0.0126847978870658
ENSMUSG00000016534	16784	Lamp2	1613.07865197988	0.850710853508315	0.0774690496478658	10.9812997238924	4.70110824241104e-28	5.23678046808685e-26
ENSMUSG00000016541	54138	Atxn10	537.905476094193	0.709270001521777	0.0883805501777005	8.02518201228322	1.01375523489851e-15	2.55709521184681e-14
ENSMUSG00000016552	239554	Foxred2	27.6788161706113	0.262808661196114	0.312728741373749	0.840372586292047	0.400699514691047	0.544625748499742
ENSMUSG00000016554	55944	Eif3d	328.353765956877	0.464888939071792	0.139054590179751	3.34321174490426	0.000828146822682092	0.00285487616624834
ENSMUSG00000016559	15081	H3f3b	1533.95825917992	1.18152882654384	0.134871731053403	8.76038898081621	1.94577754016898e-18	7.17327075989307e-17
ENSMUSG00000016619	18141	Nup50	270.093141598365	0.229667999449537	0.147532449758897	1.55672870493826	0.119534910451244	0.214023081390846
ENSMUSG00000016624	271305	Phf21b	19.0884090645676	-0.236571359725628	0.329357613782488	-0.71828113219773	0.472583961421106	0.611362854800135
ENSMUSG00000016626	76858	Nlrp14	0	NA	NA	NA	NA	NA
ENSMUSG00000016637	67042	Ift27	122.614513439907	1.1688270966868	0.222395395057849	5.25562634236542	1.47521537577409e-07	1.08189460725809e-06
ENSMUSG00000016664	23970	Pacsin2	870.14876903892	-0.200856281384081	0.119082777054236	-1.6866946367282	0.0916620839058463	0.172698137240051
ENSMUSG00000016756	12763	Cmah	51.4042581620365	0.593667530569035	0.222795077195899	2.66463486554972	0.00770719553790486	0.0209870356296437
ENSMUSG00000016757	223723	Ttll12	232.007816281085	0.912660449165149	0.121014853355927	7.54172255599771	4.63803692179796e-14	9.3340493051184e-13
ENSMUSG00000016758	12124	Bik	14.4910884686127	1.11335226691787	0.43591187661869	2.55407646966169	0.0106469870663988	0.0278160635730662
ENSMUSG00000016763	64706	Scube1	8.0355247012602	-0.824837521445126	0.587788948956607	-1.40328858327348	0.160530801260678	0.270610940889984
ENSMUSG00000016831	268741	Tox4	800.521301407765	-0.382433145017359	0.114056792457687	-3.35300631182693	0.000799388835598986	0.00276824149286236
ENSMUSG00000016833	68735	Mrps18c	66.2394542925477	0.380290142249455	0.203446607248353	1.86923806394679	0.0615897007495481	0.124094696230611
ENSMUSG00000016918	240725	Sulf1	280.23455004119	0.707989295199848	0.139422496720436	5.07801331817688	3.81401966070472e-07	2.57112584781821e-06
ENSMUSG00000016921	67996	Srsf6	1133.18674692844	0.486442809145029	0.0853994727402947	5.69608679697979	1.22588485701863e-08	1.07823453407768e-07
ENSMUSG00000016933	18803	Plcg1	464.194626033593	0.140152089689252	0.108134275876616	1.29609310787977	0.194943409177894	0.314916812443211
ENSMUSG00000016940	70382	Kctd2	255.205939467215	-0.136175509684475	0.104351188652206	-1.30497324892328	0.191901957019257	0.311149923702034
ENSMUSG00000016942	71753	Tmprss6	2.98317614137713	0.266065765020163	0.802705132540467	0.331461397509813	0.740295994797605	0.830151423785179
ENSMUSG00000016946	69259	Kctd5	202.228556774696	0.159814552953046	0.125655635087901	1.27184549138006	0.203428022094083	0.325788364883032
ENSMUSG00000016982	195236	Pom121l2	0	NA	NA	NA	NA	NA
ENSMUSG00000016984	68145	Etaa1	41.0713076724529	0.455453965471844	0.239500914006152	1.90167944603395	0.0572130745585964	0.116841446883714
ENSMUSG00000016995	17183	Matn4	33.9123928317806	0.296086811729578	0.278888382164552	1.06166778777783	0.288386527811438	0.42565926408776
ENSMUSG00000016998	20941	Svs4	0	NA	NA	NA	NA	NA
ENSMUSG00000017000	20945	Svs6	0.062701201125813	0	4.32794324778021	0	1	NA
ENSMUSG00000017002	20568	Slpi	9.2546267905457	2.46247864790103	0.749760880009583	3.2843520028273	0.00102217167671429	0.0034595623982147
ENSMUSG00000017003	64335	Svs3a	0	NA	NA	NA	NA	NA
ENSMUSG00000017004	20944	Svs5	0	NA	NA	NA	NA	NA
ENSMUSG00000017007	19668	Rbpjl	0.476554085017149	-1.57906134949539	2.03876524840054	-0.774518474225612	0.438624247570986	NA
ENSMUSG00000017009	20971	Sdc4	694.77008760531	0.172998436782231	0.433231955230021	0.399320582643491	0.689657002995986	0.792088921459136
ENSMUSG00000017049	67929	Ccdc70	0	NA	NA	NA	NA	NA
ENSMUSG00000017057	16164	Il13ra1	165.855411699703	2.25111888828465	0.207821951476733	10.831959147187	2.42901846818347e-27	2.5154378187098e-25
ENSMUSG00000017064	28078	Prl5a1	0	NA	NA	NA	NA	NA
ENSMUSG00000017119	17966	Nbr1	1085.28927187028	-0.160067817288882	0.108109266126084	-1.48061145010642	0.138710142426637	0.240771408452279
ENSMUSG00000017132	19157	Cyth1	594.632125871874	-0.687907598973748	0.131257412247281	-5.24090477784047	1.59791161274319e-07	1.16400715855114e-06
ENSMUSG00000017144	74194	Rnd3	181.816105714777	0.773723991680128	0.138625909644851	5.58138080869839	2.38616551555199e-08	1.99732327150672e-07
ENSMUSG00000017146	12189	Brca1	12.6749926843983	2.8714526679517	0.650424693903679	4.41473501062512	1.01133795726903e-05	5.23659613653272e-05
ENSMUSG00000017165	14459	Gast	0	NA	NA	NA	NA	NA
ENSMUSG00000017167	53321	Cntnap1	37.9680688356159	-0.331889237447748	0.284484464036154	-1.16663396214694	0.243358221940818	0.374665889875936
ENSMUSG00000017176	68106	Nt5c3b	138.120114508836	0.647341626147257	0.164785680064307	3.92838519642383	8.55181578760926e-05	0.000367770909330241
ENSMUSG00000017188	52469	Coa3	687.548000470054	-0.0564219707063323	0.153057490699911	-0.368632534404701	0.71240164190427	0.809192142223623
ENSMUSG00000017195	69376	Zpbp2	0.119848919457445	-0.152161329576066	4.32794324778021	-0.0351578846728429	0.971953844615299	NA
ENSMUSG00000017204	57911	Gsdma	2.24033836519126	-1.71990609235457	1.1527464999302	-1.49200721273819	0.135697254500223	0.236506175637736
ENSMUSG00000017210	23989	Med24	700.663388930454	-0.42523150787501	0.0854863405869553	-4.97426261266233	6.54964698407759e-07	4.22721970084156e-06
ENSMUSG00000017211	76758	Gsdma2	0	NA	NA	NA	NA	NA
ENSMUSG00000017221	22123	Psmd3	1470.13359740428	-0.192100321250244	0.104864121466234	-1.83189749329182	0.0669666941025822	0.133145164695226
ENSMUSG00000017264	50912	Exosc10	346.169477534514	-0.0567463399101081	0.116238093869595	-0.488190558026276	0.625414871832368	0.742171466009527
ENSMUSG00000017286	67201	Glod4	262.847367370922	0.212250082895472	0.107947548762908	1.96623346549211	0.049271648423422	0.10337916215739
ENSMUSG00000017288	68299	Vps53	298.446543332946	0.120333343033242	0.125186836377026	0.961230002416813	0.336436534136012	0.477466021312234
ENSMUSG00000017291	216965	Taok1	670.288060512296	-0.418102833673904	0.113285523486964	-3.69069957753266	0.000223638142468892	0.000881885732873885
ENSMUSG00000017299	76233	Dnttip1	148.549757800604	0.185003932948102	0.142964957242521	1.29405090951251	0.195647836489549	0.315807207204247
ENSMUSG00000017300	21925	Tnnc2	8.69359915475298	0.124739291202589	0.456794077843923	0.273075543779729	0.784795145747702	0.859994595531673
ENSMUSG00000017307	170789	Acot8	74.7954015792248	0.00203360534047995	0.184372809553932	0.0110298549194971	0.991199627491045	0.995120349224973
ENSMUSG00000017309	52685	Cd300lg	492.898992958747	-0.63704615202953	0.122308133448982	-5.20853465804268	1.90337802144801e-07	1.36434136577393e-06
ENSMUSG00000017310	78239	Spint4	0	NA	NA	NA	NA	NA
ENSMUSG00000017311	217212	Pyy	0	NA	NA	NA	NA	NA
ENSMUSG00000017314	50997	Mpp2	35.8341052636104	-0.917942248471724	0.253494010256907	-3.62115951986962	0.000293285600503576	0.001128459607016
ENSMUSG00000017316	19064	Ppy	0	NA	NA	NA	NA	NA
ENSMUSG00000017344	22370	Vtn	458.158672783773	0.122690143092635	0.130648706796661	0.939084251967284	0.347687489007096	0.48963775514624
ENSMUSG00000017376	18099	Nlk	147.200945448407	-0.495453652863736	0.130827985674657	-3.78706169256346	0.000152439261716715	0.000620598242879903
ENSMUSG00000017386	22032	Traf4	123.397823544321	1.6329846167743	0.256991787624715	6.35422879410819	2.09474862165949e-10	2.45415461029896e-09
ENSMUSG00000017390	11676	Aldoc	10.2189273671982	1.62261548425931	0.485676981142802	3.34093553382185	0.000834966077972512	0.00287597876230278
ENSMUSG00000017400	217154	Stac2	40.173654287982	5.39595197651773	0.709806210058271	7.60200728037412	2.91572325677122e-14	6.03891707291873e-13
ENSMUSG00000017404	19921	Rpl19	921.819015991541	0.727054700831762	0.147733284419128	4.92140077769518	8.59269632479162e-07	5.45023963869823e-06
ENSMUSG00000017405	140859	Nek8	28.1940856753611	1.03055449934915	0.271379492700278	3.7974663785201	0.000146182596661799	0.000596884991561734
ENSMUSG00000017412	12298	Cacnb4	8.18581177954636	0.280586042570412	0.520283099358634	0.539294939459493	0.589683360098596	0.71353872949508
ENSMUSG00000017417	72324	Plxdc1	107.12025593845	-0.055520784269478	0.200427752783313	-0.277011459233906	0.781771307142282	0.858141211121133
ENSMUSG00000017418	75869	Arl5b	224.41190814337	-0.839708195385782	0.154862444721634	-5.42228425293919	5.88422129510048e-08	4.61950599807355e-07
ENSMUSG00000017421	22680	Zfp207	748.153484038636	0.186060185956691	0.0959617918587133	1.93889862155379	0.0525136838483114	0.108928233190337
ENSMUSG00000017428	69077	Psmd11	1346.53899715421	-0.280313294913845	0.153547474635243	-1.82558062631598	0.0679134562554646	0.134780470307037
ENSMUSG00000017446	56745	C1qtnf1	126.001773471768	0.135101041506989	0.166884101112837	0.809550104570125	0.418198794760873	0.561214660678171
ENSMUSG00000017453	19193	Pipox	0.785689283705321	-0.143746770410939	1.86966126385801	-0.0768838576215245	0.938715939284556	0.961818628587289
ENSMUSG00000017466	21858	Timp2	3260.70983074657	0.5435877345496	0.138437188288002	3.92660195769602	8.61543810719808e-05	0.000370352416589775
ENSMUSG00000017478	76014	Zc3h18	569.276602311654	-0.386425623107965	0.106735242908533	-3.62041264513835	0.000294133545486869	0.00113108865560616
ENSMUSG00000017485	21974	Top2b	636.715665487133	-0.151451054947712	0.0780998030937065	-1.93919893454785	0.0524771193118987	0.108863345558648
ENSMUSG00000017491	218772	Rarb	45.6915513309173	-1.08315564618428	0.231824225397484	-4.67231431196247	2.97824731194896e-06	1.71776436061136e-05
ENSMUSG00000017493	16010	Igfbp4	1848.91395760638	1.09425276444296	0.136360829717011	8.02468543726127	1.01786425402582e-15	2.5643210937609e-14
ENSMUSG00000017499	23834	Cdc6	18.0670190978836	2.22540014855015	0.538661287137867	4.13135341575153	3.60633628767419e-05	0.000167536921137037
ENSMUSG00000017548	52615	Suz12	268.825545717808	-0.239985674578909	0.1181671382743	-2.03090028313822	0.0422651110660352	0.0909659957022302
ENSMUSG00000017550	237877	Atad5	23.2877250860215	1.22015042639472	0.35518567592615	3.43524671487151	0.000592014588553905	0.00211521941723376
ENSMUSG00000017561	54394	Crlf3	126.899210229816	0.74385874823146	0.165202260922061	4.50271530231899	6.70907313019375e-06	3.60053591320398e-05
ENSMUSG00000017588	16675	Krt27	0	NA	NA	NA	NA	NA
ENSMUSG00000017607	217169	Tns4	7.00932767469231	1.14253988051626	0.561358395075962	2.03531271739804	0.0418194173542813	0.0901573964679391
ENSMUSG00000017615	21927	Tnfaip1	1128.27814611827	-0.397146567788912	0.0880997784925286	-4.50791789246772	6.54668996579494e-06	3.5225636244152e-05
ENSMUSG00000017631	109934	Abr	344.424261147743	1.00734538818344	0.148823954599009	6.76870461410349	1.29940525018878e-11	1.83035840026591e-10
ENSMUSG00000017639	268451	Rab11fip4	10.8572065419083	0.34814603251507	0.478438633258363	0.727671237884896	0.466814861011508	0.606297388020745
ENSMUSG00000017652	21939	Cd40	30.0526092072865	1.87918886253063	0.364971795969518	5.14886049629867	2.62073700343533e-07	1.8111384361769e-06
ENSMUSG00000017664	228875	Slc35c2	304.048758377191	0.0779377576166337	0.121908816990215	0.63931190163948	0.52262004748941	0.655916805034212
ENSMUSG00000017667	228876	Zfp334	72.1052884041563	-0.745083013000414	0.199477182860989	-3.73517914336922	0.000187581606844172	0.000749598943929552
ENSMUSG00000017670	140579	Elmo2	363.246436358274	0.0818836432855713	0.0949806924161071	0.862108300146328	0.388627924334485	0.531972385565265
ENSMUSG00000017677	78889	Wsb1	414.549217357647	0.747227304186251	0.129972814350344	5.74910459484311	8.97173062085928e-09	8.0596959300204e-08
ENSMUSG00000017679	76080	Ttpal	142.315048725951	0.661685026846801	0.278928268131322	2.37224083195208	0.0176805621202704	0.0431755405087766
ENSMUSG00000017686	59040	Rhot1	546.046471727418	-0.371182412671329	0.0960922410156498	-3.86277194441617	0.00011210765656979	0.000469576135485818
ENSMUSG00000017688	30942	Hnf4g	0.0725965576462252	0	4.327943247778	0	1	NA
ENSMUSG00000017692	246104	Rhbdl3	148.141814676265	-0.815352796316563	0.191289631214288	-4.2623993320536	2.02243615181339e-05	9.90351273910718e-05
ENSMUSG00000017697	11486	Ada	19.5924027127573	1.4657672404822	0.362078831875737	4.04819920813609	5.16132093617216e-05	0.00023178143790071
ENSMUSG00000017707	26943	Serinc3	2894.62768816653	-0.0248291990240626	0.106829876457879	-0.232418119793037	0.816213276649171	0.882735408301554
ENSMUSG00000017713	71776	Tha1	87.4156153659333	0.0175930854714268	0.192766584681891	0.0912662612166905	0.927281025722139	0.956235357189844
ENSMUSG00000017715	74451	Pgs1	328.102588405231	-0.0013752643681666	0.141238961064083	-0.0097371458824496	0.992231004399984	0.995612841497461
ENSMUSG00000017716	11799	Birc5	44.248106929166	4.38109944051899	0.631126711102082	6.94171132904304	3.8737818009775e-12	5.93538255424121e-11
ENSMUSG00000017718	71562	Afmid	11.9371641889943	0.319950917428133	0.392349569227105	0.81547411421506	0.414800975911035	0.55808382099808
ENSMUSG00000017720	73603	Trp53tg5	0.483156937736756	-0.128662844106578	1.83671483229292	-0.0700505281736949	0.944153442712864	NA
ENSMUSG00000017721	78928	Pigt	612.370686426834	0.361281633554848	0.0942050115951984	3.83505747132951	0.000125534937556395	0.000519482729550639
ENSMUSG00000017723	67701	Wfdc2	0.105213424931683	0.569145655227189	4.32794324778021	0.131504879487295	0.895375926824784	NA
ENSMUSG00000017724	18612	Etv4	95.7118938285307	0.618972806402484	0.221033298328419	2.80035999590791	0.0051045644719496	0.0145497738088433
ENSMUSG00000017733	75526	Eppin	0	NA	NA	NA	NA	NA
ENSMUSG00000017734	52840	Dbndd2	62.0517788006859	-0.650300568457115	0.232049792954235	-2.80241822316716	0.00507210735556785	0.0144672648281719
ENSMUSG00000017737	17395	Mmp9	159.72129578193	1.8417579430313	0.52291862780011	3.52207369391194	0.0004281850970875	0.00158734277402036
ENSMUSG00000017740	57138	Slc12a5	23.7065247605158	-1.10024435415568	0.322150080999643	-3.41531608727704	0.00063708035227	0.00225738512716303
ENSMUSG00000017747	80860	Ghdc	127.967135165878	0.315123817770427	0.129466215913822	2.4340235446457	0.0149320237687032	0.0372451156893532
ENSMUSG00000017754	18830	Pltp	603.433114321275	1.90055962405202	0.224660526092885	8.45969542182165	2.68076758992252e-17	8.52550285387706e-16
ENSMUSG00000017756	20499	Slc12a7	204.904596141903	0.274054572384517	0.171247813129874	1.60033910726016	0.109523375684502	0.199792664079509
ENSMUSG00000017760	19025	Ctsa	1415.87755048728	1.23000450242263	0.140395704343704	8.76098387890445	1.93553486421922e-18	7.14829793581178e-17
ENSMUSG00000017764	71971	Zswim1	90.4555596842195	-0.549401634994523	0.164962238354326	-3.33046908477594	0.000866997905329746	0.00297834519637196
ENSMUSG00000017765	20498	Slc12a4	270.423970124031	0.2627262907931	0.150055391811485	1.75086204915025	0.079969675312397	0.154598036476349
ENSMUSG00000017767	75642	Spata25	0.555014164074665	0.827097485451465	1.9094964632978	0.433149524677843	0.664906145733978	NA
ENSMUSG00000017774	17913	Myo1c	1425.5282272407	0.404743348030702	0.152709166129581	2.65041947571935	0.00803918884444296	0.0218017638776524
ENSMUSG00000017776	12928	Crk	920.947541909683	-0.480573484653697	0.148103056793764	-3.24485864814326	0.0011750893798849	0.00391808397111198
ENSMUSG00000017778	12867	Cox7c	3766.39766723912	-0.282625728429492	0.159900987185667	-1.76750458770667	0.0771437613790512	0.150035733720223
ENSMUSG00000017781	18738	Pitpna	1895.74095285119	0.126161776035102	0.101147968046969	1.24729916449253	0.212287823697441	0.337043718856461
ENSMUSG00000017801	21428	Mlx	133.458573891989	0.0535949195162376	0.145134692289667	0.369277108530813	0.71192118639508	0.808824731750913
ENSMUSG00000017802	67998	Retreg3	663.470675872759	-0.195787942411552	0.0875551617506582	-2.23616676043752	0.0253408496673585	0.0588686991257945
ENSMUSG00000017817	59091	Jph2	12770.2407239571	-0.887797724495326	0.144519096934685	-6.14311702277355	8.09176226687424e-10	8.55592800388632e-09
ENSMUSG00000017830	80861	Dhx58	57.8807401525029	2.29337000470296	0.354093916070291	6.47672806738568	9.37328969274207e-11	1.16434450866804e-09
ENSMUSG00000017831	271457	Rab5a	656.840274532176	-0.251041694416159	0.101804642914209	-2.46591596640354	0.0136663391894462	0.0345438388343073
ENSMUSG00000017832	75482	Hspb9	1.38525707383806	0.331793115140061	1.11062867128616	0.298743516819018	0.765135750778457	0.846917904825569
ENSMUSG00000017837	71966	Nkiras2	351.675395105911	0.321703244169949	0.111506151740989	2.88507171261021	0.00391324511014504	0.0114600192169773
ENSMUSG00000017843	26931	Ppp2r5c	1205.81763571652	-0.282516289100396	0.0820805475007288	-3.44193962763086	0.000577559134314108	0.00207249497474232
ENSMUSG00000017858	245866	Ift52	193.016435693645	0.0851895581108176	0.135788901435274	0.627367606706976	0.53041829646451	0.662596851157218
ENSMUSG00000017861	17865	Mybl2	17.2819920840105	3.61814354124648	0.768131746103387	4.71031637424278	2.47332552394627e-06	1.44637606122261e-05
ENSMUSG00000017868	27219	Sgk2	0.124560481907046	0.569145655227189	4.32794324778021	0.131504879487295	0.895375926824784	NA
ENSMUSG00000017897	14049	Eya2	38.9542063351807	-0.432820571764479	0.244904377791609	-1.76730434820063	0.0771772720376225	0.150086743620961
ENSMUSG00000017922	27372	Prl3c1	0	NA	NA	NA	NA	NA
ENSMUSG00000017929	56336	B4galt5	291.402150398052	0.442321311782909	0.231745849418724	1.90864825796173	0.0563074821260862	0.115266175787661
ENSMUSG00000017943	228858	Gdap1l1	0.936316176507286	2.20968734122728	1.61720415931643	1.36636263794998	0.171825169604945	0.285272942783598
ENSMUSG00000017950	15378	Hnf4a	0.0718669613707019	0	4.32794324778021	0	1	NA
ENSMUSG00000017969	19223	Ptgis	70.6118570918026	0.0130469837813714	0.209463623349827	0.0622875875663695	0.950333812970602	0.968857188963004
ENSMUSG00000017978	320405	Cadps2	10.549586294089	-0.811558447112312	0.543403679183804	-1.49347249236751	0.135313549511024	0.236057024322626
ENSMUSG00000017999	228889	Ddx27	197.209886888724	0.415384823816306	0.180858412653836	2.29674040439221	0.0216335830628771	0.0514452896099436
ENSMUSG00000018001	19159	Cyth3	393.508109108914	0.555745066773864	0.187974997543588	2.95648396880547	0.00311168406961961	0.00932328951827869
ENSMUSG00000018008	72318	Cyth4	421.400953421443	3.11620424453242	0.207859322959034	14.9918906699536	8.29576555019466e-51	7.43300593297442e-48
ENSMUSG00000018012	170758	Rac3	13.69429107577	0.796617428112499	0.49076632639422	1.62321126220179	0.104544251144945	0.192378598767303
ENSMUSG00000018040	74778	Rrp7a	350.336147344079	0.136494611245443	0.110147857992429	1.23919442223584	0.215273505709034	0.340864879420036
ENSMUSG00000018042	109754	Cyb5r3	1282.79370417512	1.10729234914702	0.126866340178716	8.72802311146659	2.59162701440465e-18	9.43608648636944e-17
ENSMUSG00000018068	70422	Ints2	70.9599863966677	0.127531566824009	0.198508197014309	0.642449877345952	0.520581123605305	0.654114736617165
ENSMUSG00000018076	76199	Med13l	351.478864822583	-0.582689691283252	0.172028914365954	-3.38716135848946	0.000706198397937214	0.00247927369415504
ENSMUSG00000018102	68024	H2bc4	728.979327059169	-0.200279031220864	0.155916594234465	-1.28452671894364	0.198957720891631	0.319722451039826
ENSMUSG00000018126	207495	Baiap2l2	42.7309144715864	0.728557039834737	0.306364021915092	2.37807636575765	0.0174032213210588	0.0425843724749917
ENSMUSG00000018143	17135	Mafk	406.544232336456	-0.574914636078607	0.306701987381145	-1.8745057408583	0.0608607515361833	0.122830121208272
ENSMUSG00000018160	19014	Med1	383.139361712562	-0.360338097101833	0.110934813108994	-3.24819672926116	0.00116138941232282	0.0038759373294168
ENSMUSG00000018166	13867	Erbb3	105.042649817777	0.202802833150969	0.23734051873856	0.854480449561854	0.392838837347039	0.536489248512112
ENSMUSG00000018167	59045	Stard3	203.188712428829	0.264361065708323	0.109469863994895	2.41492092947746	0.0157386258994079	0.0390114989818376
ENSMUSG00000018168	22780	Ikzf3	4.34484961296732	1.99792075383749	0.952966340579059	2.09652814455491	0.0360353659478936	0.0797569349644713
ENSMUSG00000018169	17305	Mfng	74.9840808361717	0.497652423868886	0.269776894971202	1.84468141321743	0.0650838961982397	0.129978576688955
ENSMUSG00000018171	75909	Vmp1	863.331009953739	-0.0545148753589265	0.148210840766801	-0.367819756482602	0.713007636634567	0.809444548710751
ENSMUSG00000018189	56207	Uchl5	289.276090663908	-0.0297335857882268	0.107071169005339	-0.277699272964361	0.781243218744219	0.857789986247582
ENSMUSG00000018196	69367	Glrx2	406.122634037198	-0.308965542882038	0.109611160114131	-2.81874165514106	0.00482123046440217	0.013818625509096
ENSMUSG00000018199	20822	Ro60	139.310942608778	0.335805401850104	0.133979016625548	2.50640294508677	0.0121966536784538	0.0313246060575243
ENSMUSG00000018209	58231	Stk4	226.820216797906	0.362221305261047	0.135292422779283	2.67732144801618	0.0074213396367542	0.0202971423004951
ENSMUSG00000018211	192201	Wfdc15b	0.0560155469472164	0	4.32794324778021	0	1	NA
ENSMUSG00000018217	18858	Pmp22	876.707643902991	-0.607666817836045	0.169983259547695	-3.5748627214996	0.000350411707208441	0.00132306421072766
ENSMUSG00000018238	14566	Gdf9	7.12213898081032	1.10558163967488	0.597161315090951	1.85139527919101	0.0641127077419931	0.12833751152472
ENSMUSG00000018239	67966	Zcchc10	115.98466731206	-0.173983747639106	0.154425609618754	-1.1266508713719	0.259890121635219	0.393838931293374
ENSMUSG00000018259	13529	Prl8a2	0	NA	NA	NA	NA	NA
ENSMUSG00000018263	21388	Tbx5	17.1469067992783	-0.528365706196164	0.411600161828806	-1.28368682813085	0.199251555032699	0.320111664629541
ENSMUSG00000018286	19175	Psmb6	1854.70428265697	0.205634125614909	0.114499011049496	1.79594673988946	0.0725029879249687	0.142299197634072
ENSMUSG00000018287	216873	Spag7	866.128768160994	-0.0283755053369945	0.125005687231931	-0.226993714968724	0.820428629349622	0.885853148571571
ENSMUSG00000018293	18643	Pfn1	3011.40385721039	0.893205068049557	0.164104431649122	5.44290644118225	5.24181814399094e-08	4.15794412283931e-07
ENSMUSG00000018322	67145	Tomm34	229.572783343333	0.26405117182388	0.118402859058813	2.23010807275119	0.0257402690250582	0.0596687811100562
ENSMUSG00000018326	54401	Ywhab	1040.53501172225	0.53097958764837	0.110558745893708	4.80269184817687	1.56546708453119e-06	9.43584254987386e-06
ENSMUSG00000018334	16706	Ksr1	1740.57660235105	-0.885232172227784	0.160711716187852	-5.50819935985911	3.62522718779981e-08	2.95641796146333e-07
ENSMUSG00000018339	14778	Gpx3	2697.88982617751	0.178585597291027	0.186093250488717	0.959656499212228	0.337228123496749	0.478260076321038
ENSMUSG00000018340	11749	Anxa6	3492.73058486031	0.0576019160856098	0.0904599135462227	0.636767313028402	0.524276420383371	0.656915453958808
ENSMUSG00000018341	16162	Il12rb2	8.30514857862757	-1.00752974433182	0.562993417084463	-1.78959418308912	0.0735191743117901	0.14410149745267
ENSMUSG00000018347	52712	Zkscan6	49.9998494063698	0.687361369797099	0.199523442251785	3.44501559335416	0.000571026448986832	0.00205288236307351
ENSMUSG00000018362	16647	Kpna2	228.933700561784	0.920424035606518	0.272872651585165	3.37309008528196	0.000743296297137773	0.00259590092403759
ENSMUSG00000018363	66313	Smurf2	409.647830240206	-0.739352516707721	0.152240987369588	-4.85646164992895	1.19501912766756e-06	7.36011780722444e-06
ENSMUSG00000018372	320162	Cep95	68.3599178928716	0.074698704430231	0.20622829163344	0.362213660592234	0.717192372013544	0.812707599387172
ENSMUSG00000018377	22344	Vezf1	1185.87713647209	-0.832157019844811	0.142472089928804	-5.84084237313186	5.19375289653594e-09	4.82554133273797e-08
ENSMUSG00000018378	70393	Cuedc1	2052.98137792526	-0.617923677680948	0.161688238775423	-3.82169836446307	0.000132535741890535	0.000545931754723193
ENSMUSG00000018378	103841	Cuedc1	2052.98137792526	-0.617923677680948	0.161688238775423	-3.82169836446307	0.000132535741890535	0.000545931754723193
ENSMUSG00000018379	110809	Srsf1	933.676124346622	0.320773489093682	0.136642532618167	2.34753764400758	0.0188979634296992	0.0457368444344382
ENSMUSG00000018381	66610	Abi3	7.87791999036713	0.996936076428947	0.539289080153138	1.84861165025974	0.0645139092224389	0.129002779085583
ENSMUSG00000018387	71774	Shroom1	10.8063088510136	0.153914827288505	0.43052024730795	0.357508916830129	0.720710852026142	0.815439180770547
ENSMUSG00000018395	16568	Kif3a	123.449568069283	0.7372601116133	0.161548793017235	4.56369928764894	5.02600551617943e-06	2.76055228351348e-05
ENSMUSG00000018398	20362	Septin8	480.525347995155	0.55645799089744	0.125894566232549	4.42003183735162	9.86863610272283e-06	5.12016245732407e-05
ENSMUSG00000018401	170749	Mtmr4	163.229454073223	-0.116875036964753	0.16553836063014	-0.706029928772128	0.48016952556613	0.618226513986431
ENSMUSG00000018405	217038	Mrm1	134.961568537721	-0.347507511296232	0.173602583664911	-2.00174158678994	0.0453125312257778	0.096377401537912
ENSMUSG00000018411	17762	Mapt	1120.57894658954	-0.751140716049441	0.162842672855027	-4.61267739518225	3.97515026955762e-06	2.23032662006653e-05
ENSMUSG00000018412	76719	Kansl1	317.538371318099	-0.606859987487861	0.128181128475572	-4.7343941710071	2.19710373355431e-06	1.29781667560923e-05
ENSMUSG00000018415	66771	Gid4	1104.43603147492	-1.83012789565954	0.169590593779375	-10.7914469480566	3.77793915404532e-27	3.7759621196099e-25
ENSMUSG00000018417	17912	Myo1b	238.185677209431	0.069165877216587	0.160542036992671	0.430827205834846	0.666594016239542	0.774929175081203
ENSMUSG00000018425	67487	Dhx40	231.435131985605	-0.286986285387986	0.103640083531216	-2.76906651953389	0.00562171562521562	0.0158680065202634
ENSMUSG00000018427	77864	Ypel2	242.316469733342	-0.601933023037826	0.255114190529441	-2.35946507635905	0.0183013033968578	0.044533387696593
ENSMUSG00000018428	11640	Akap1	1097.71912223039	-1.03530579594995	0.159997368325078	-6.47076765566821	9.75062684767584e-11	1.20612795964528e-09
ENSMUSG00000018433	68979	Nol11	177.494940166025	-0.359233451431377	0.140268310083366	-2.5610449802801	0.0104357843899707	0.0273440107703136
ENSMUSG00000018442	116891	Derl2	297.548837457946	0.389519452046661	0.13057126126549	2.98319437425555	0.00285256771050176	0.00864114587358818
ENSMUSG00000018446	12261	C1qbp	956.706410176404	-0.0832538340812022	0.100615793257143	-0.827443002595337	0.407986015386179	0.551510384065489
ENSMUSG00000018449	69723	Rpain	91.4954348981104	0.214168425755199	0.178478520351173	1.19996751056543	0.230151958679643	0.359044024562459
ENSMUSG00000018451	103712	6330403K07Rik	8.36368855799293	2.84535351248177	0.589267781381623	4.82862563062659	1.3747858938677e-06	8.38212653870581e-06
ENSMUSG00000018459	114644	Slc13a3	29.94695501041	3.79886146920889	0.588302013611908	6.45733208677225	1.06564885239864e-10	1.31047727148884e-09
ENSMUSG00000018470	16499	Kcnab3	2.79364064254995	0.45876093964045	0.800288675906812	0.573244322269868	0.566479278183462	0.693642600404325
ENSMUSG00000018474	216848	Chd3	353.234970666137	0.766336009752579	0.137650135867879	5.56727390729301	2.58755487188522e-08	2.15713312296968e-07
ENSMUSG00000018476	216850	Kdm6b	504.269142605453	-0.793634969237521	0.194296555510288	-4.08465794544412	4.41417927378761e-05	0.000201077379474392
ENSMUSG00000018479	73634	Chct1	0.0838059907282369	0.569145655227189	4.32794324778021	0.131504879487295	0.895375926824784	NA
ENSMUSG00000018481	66884	Appbp2	240.199607247425	0.137076423048158	0.127449800065961	1.07553266444682	0.282136316042417	0.419620756423364
ENSMUSG00000018486	22412	Wnt9b	1.1925019866807	-0.192214335508681	1.24609014744505	-0.154253956587967	0.877409500035605	0.923608273821276
ENSMUSG00000018500	11541	Adora2b	23.2593588590677	1.92625077128984	0.597826166724006	3.22209176932718	0.00127258368376011	0.00420076959073015
ENSMUSG00000018501	20185	Ncor1	1396.5721507726	-0.655375602236915	0.110587350328007	-5.92631616810642	3.09805841114207e-09	2.99600130158685e-08
ENSMUSG00000018507	22368	Trpv2	100.257512848609	2.24829793082671	0.242275269174055	9.27993161865599	1.69587368498996e-20	7.96094872443581e-19
ENSMUSG00000018509	73139	Cenpv	130.551745344683	-0.172833357224256	0.160081667787349	-1.07965739995816	0.280294770598629	0.417454262665068
ENSMUSG00000018537	22658	Pcgf2	62.2727121471371	0.971650202715012	0.239102974407269	4.06373113978908	4.82944517742459e-05	0.000218257031176241
ENSMUSG00000018541	67480	Cwc25	189.102285745999	0.105791645484941	0.116717484992679	0.906390721934905	0.364729081880189	0.507826290074112
ENSMUSG00000018543	72215	1700001P01Rik	0.306748293000113	-1.8097995210729	3.65582286574974	-0.495045735948628	0.62056783658366	NA
ENSMUSG00000018547	108083	Pip4k2b	894.55276667868	-0.73653232354015	0.152210084739959	-4.83891934492033	1.30547007401631e-06	7.98549340615262e-06
ENSMUSG00000018548	68729	Trim37	114.901229016602	0.110726364545525	0.163642719079103	0.676634836970664	0.498637670172119	0.634904238919186
ENSMUSG00000018554	53422	Ybx2	136.93027937416	-1.7199145971113	0.23457681813141	-7.33198877370652	2.2676209652237e-13	4.14650690783763e-12
ENSMUSG00000018559	67181	Ctdnep1	1334.22427738338	-0.436199686065995	0.114234856178842	-3.81844649397637	0.000134294703426352	0.000552183808501648
ENSMUSG00000018565	54351	Elp5	391.776133210372	0.0337489197976903	0.110900805675517	0.304316272475385	0.760886949054907	0.844028326306573
ENSMUSG00000018566	20528	Slc2a4	5456.68108222576	-1.35284114577334	0.150279858442394	-9.00214546244006	2.21349024227455e-19	8.99153583980863e-18
ENSMUSG00000018567	56486	Gabarap	1800.78713776015	0.45240356997098	0.0996796445099145	4.5385752747742	5.66355786964907e-06	3.08035367056553e-05
ENSMUSG00000018569	53624	Cldn7	2.00619431303282	0.123044486920084	0.969668620357324	0.12689333689559	0.899024820397573	0.937986203865593
ENSMUSG00000018570	70419	2810408A11Rik	7.01625854592736	1.89846369034981	0.61987764003726	3.06264263740131	0.00219391889136711	0.00682655601891791
ENSMUSG00000018572	78246	Phf23	312.299388508285	0.351058351666599	0.104134689645391	3.37119506345153	0.000748428438880439	0.00261195821650264
ENSMUSG00000018574	11370	Acadvl	2040.98387809022	-1.1024524480113	0.164538574604724	-6.70026740331112	2.08038493057222e-11	2.84678437245899e-10
ENSMUSG00000018581	13411	Dnah11	0	NA	NA	NA	NA	NA
ENSMUSG00000018583	27041	G3bp1	1587.15638739964	-0.0111568460788042	0.0825757301014018	-0.135110474531727	0.89252452864063	0.933601743082119
ENSMUSG00000018585	11927	Atox1	305.419176744152	0.948998259615761	0.169344791434863	5.60394123477241	2.09531772856174e-08	1.77113649508615e-07
ENSMUSG00000018589	237213	Glra2	0	NA	NA	NA	NA	NA
ENSMUSG00000018593	20692	Sparc	13703.6599563565	0.749036573215166	0.119259951406039	6.28070500100203	3.37041134393077e-10	3.81634269097392e-09
ENSMUSG00000018595	14657	Glra4	0.085682133476458	0	4.32794324778021	0	1	NA
ENSMUSG00000018599	237781	Mief2	1095.02840216963	-0.333867970985268	0.149915557647568	-2.22704018331539	0.0259445883329255	0.0600680908173159
ENSMUSG00000018604	21386	Tbx3	101.637666295414	-0.52437223027987	0.179968413645607	-2.91369035075489	0.00357184004045983	0.0105592425123793
ENSMUSG00000018620	30800	Mmp20	0	NA	NA	NA	NA	NA
ENSMUSG00000018623	17393	Mmp7	0	NA	NA	NA	NA	NA
ENSMUSG00000018634	12921	Crhr1	0	NA	NA	NA	NA	NA
ENSMUSG00000018648	56405	Dusp14	54.9042415371925	-0.42210096207407	0.227562133977492	-1.8548822455489	0.0636130438566813	0.127510709833527
ENSMUSG00000018651	217031	Tada2a	143.20197892574	-0.336948393673469	0.13485586850913	-2.49858161456769	0.0124691426706202	0.0319091136416417
ENSMUSG00000018654	22778	Ikzf1	66.4249644234374	2.38033634004922	0.249238689072229	9.55042874326545	1.29160643746153e-21	6.84252582601725e-20
ENSMUSG00000018656	403088	Tcaf3	0.0560155469472164	0	4.32794324778021	0	1	NA
ENSMUSG00000018659	103711	Pnpo	136.500007259106	-0.342877847901049	0.155320333980096	-2.20755286262124	0.027275458132345	0.0626775915690641
ENSMUSG00000018661	16834	Cog1	307.960092740387	-0.103267535208141	0.134945326641915	-0.765254624060952	0.444119938339516	0.585081102684954
ENSMUSG00000018666	12412	Cbx1	622.56340737557	-0.150709209706457	0.0819450115852738	-1.83915050826036	0.0658930517863036	0.131365387560428
ENSMUSG00000018669	80280	Cdk5rap3	271.727722353793	0.427023489505195	0.133431284216168	3.20032511126392	0.00137272649409614	0.00449298764386328
ENSMUSG00000018672	56358	Copz2	404.399937313641	0.752503392103328	0.134856272282168	5.58003998901005	2.40463294307958e-08	2.01196409626407e-07
ENSMUSG00000018677	68066	Slc25a39	867.28412550509	-0.00567984218766117	0.120445163685221	-0.0471570797355152	0.96238803484924	0.976412594632392
ENSMUSG00000018678	78912	Sp2	162.193707444276	-0.64487020107541	0.16208667057731	-3.97855171420667	6.93363314438979e-05	0.000304017684765074
ENSMUSG00000018697	56321	Aatf	143.45437194333	0.656022058442257	0.158221809583907	4.14621764324065	3.38012550015131e-05	0.000157989626462051
ENSMUSG00000018698	16869	Lhx1	0.0486840177887557	0	4.32794324778021	0	1	NA
ENSMUSG00000018707	13424	Dync1h1	2072.49010300756	-0.181378124024405	0.152332119997381	-1.1906755057799	0.233780997284036	0.363796631581168
ENSMUSG00000018727	52670	Cpsf4l	7.27050482059159	0.411918093308077	0.504274511186635	0.816852892958581	0.414012500984869	0.557171659393729
ENSMUSG00000018733	103737	Pex12	123.09950379353	-0.272627568398946	0.159822320960046	-1.70581660159409	0.0880422311413765	0.167300534749791
[truncated: 49,274 more rows]

## Sheet: SGCA_KO_vs_SGCA_AAV9
Differential gene expression analysis, comparison between SGCA_KO and SGCA_AAV9
ensembl_gene_id	entrezgene_id	external_gene_name	baseMean	log2FoldChange	lfcSE	stat	pvalue	padj
ENSMUSG00000000001	14679	Gnai3	359.719184391503	0.105923854900745	0.175906202350037	0.602161001065594	0.547066972453188	0.749765541496705
ENSMUSG00000000003	54192	Pbsn	0	NA	NA	NA	NA	NA
ENSMUSG00000000028	12544	Cdc45	44.0419747455079	0.532950194174602	0.301659927824663	1.76672519289461	0.0772742621220049	0.251101072563361
ENSMUSG00000000031	14955	H19	13679.2380981477	-0.0486817339395767	0.234427004036966	-0.207662654477725	0.835492379369282	0.921860678592868
ENSMUSG00000000037	107815	Scml2	3.93993255149214	-0.641302019655229	0.799407434975024	-0.802221735247265	0.422424705638628	NA
ENSMUSG00000000049	11818	Apoh	7.41455405921387	-0.671653490185229	0.675864529713223	-0.993769402975207	0.320335145340238	NA
ENSMUSG00000000056	67608	Narf	1667.61645947526	-0.349506764451855	0.162956895754063	-2.14478045150869	0.0319704049027151	0.154883493904149
ENSMUSG00000000058	12390	Cav2	447.432582860775	-0.276990716983125	0.164318671403697	-1.68569228692591	0.0918550832622047	0.277457668300732
ENSMUSG00000000078	23849	Klf6	854.563107736782	-0.445995029794535	0.305516887814128	-1.45980483431041	0.144343719561328	0.358383210424108
ENSMUSG00000000085	29871	Scmh1	453.023976870613	-0.0752037865343121	0.111125212459944	-0.676748191247958	0.498565734587826	0.714332477541965
ENSMUSG00000000088	12858	Cox5a	1806.45868261664	-0.109427550976819	0.154814803142539	-0.706828731849811	0.479672917115903	0.701040208145512
ENSMUSG00000000093	21385	Tbx2	96.5637258968969	0.272241818239726	0.210745856189064	1.29180152418036	0.196425887400297	0.427275113740424
ENSMUSG00000000094	21387	Tbx4	50.8209780651244	0.144681122250736	0.250023318007919	0.578670515228316	0.562811514488824	0.760100336705122
ENSMUSG00000000103	22768	Zfy2	0	NA	NA	NA	NA	NA
ENSMUSG00000000120	18053	Ngfr	25.2562761092902	0.704765738658766	0.334851488383303	2.10471138133937	0.0353164391645972	0.164522322393176
ENSMUSG00000000125	22415	Wnt3	0.609283897188893	2.52081109308229	1.73250359056014	1.45501060246997	0.145666326298872	NA
ENSMUSG00000000126	216795	Wnt9a	196.15089985442	-0.0638562632424692	0.179166873589057	-0.35640663903603	0.721536058160763	0.859377840919201
ENSMUSG00000000127	14158	Fer	125.607251219006	-0.0817805267021748	0.133001447268723	-0.614884487211192	0.538631008216906	0.743781299071616
ENSMUSG00000000131	74204	Xpo6	426.673489038912	-0.13097605665775	0.136064442016516	-0.96260312184907	0.335746730277906	0.580458947489246
ENSMUSG00000000134	209446	Tfe3	262.416019697795	0.342152991619715	0.120861294268206	2.83095587955922	0.00464091223300649	0.0559341020892255
ENSMUSG00000000142	12006	Axin2	75.307857056433	0.0629029775217673	0.290648431786493	0.216422903557845	0.828658114832767	0.91879951905438
ENSMUSG00000000148	231841	Brat1	134.417021675833	0.208940698076949	0.12937831807583	1.61495914604862	0.106319542351933	0.300564582882486
ENSMUSG00000000149	14673	Gna12	617.498941655761	0.309633833300351	0.117073369853473	2.64478449444039	0.00817429591333919	0.0754228603566885
ENSMUSG00000000154	18400	Slc22a18	10.8385502572441	0.720788007813269	0.426026470911555	1.69188549779788	0.0906678076070572	NA
ENSMUSG00000000157	16415	Itgb2l	0.176427290292336	-0.270704597779002	4.22327559264603	-0.0640982554513796	0.948891990939584	NA
ENSMUSG00000000159	72058	Igsf5	0	NA	NA	NA	NA	NA
ENSMUSG00000000167	72614	Pih1d2	5.48520932499515	0.020249110841632	0.625707935990981	0.0323619210767432	0.974183429149929	NA
ENSMUSG00000000168	235339	Dlat	3568.07287273512	-0.0999486193324647	0.142823543349954	-0.699804927031991	0.484049137366501	0.703659140416633
ENSMUSG00000000171	66925	Sdhd	2849.08072447999	0.03834659365086	0.137459870567882	0.278965733726071	0.780271121755825	0.892598585824078
ENSMUSG00000000182	64654	Fgf23	0.815370329447379	-1.67602105645478	1.79978963842731	-0.931231639892826	0.351733754510592	NA
ENSMUSG00000000183	14177	Fgf6	101.12774967371	-0.364152818423459	0.277235711461218	-1.3135133872333	0.189010012882199	0.418134901653838
ENSMUSG00000000184	12444	Ccnd2	279.231843575336	0.0925144120031835	0.160815625549533	0.575282480710733	0.565100268005742	0.761726386717782
ENSMUSG00000000194	277463	Gpr107	547.128997129616	0.0670548557574996	0.0942396629289778	0.711535394688693	0.476752525508973	0.698993408361329
ENSMUSG00000000197	338370	Nalcn	7.35948559333835	-0.201879498315001	0.646190849717834	-0.312414665734054	0.754725406122968	NA
ENSMUSG00000000202	72014	Btbd17	6.25742290085621	0.531767495105572	0.725606747074478	0.732859082760142	0.463644381356685	NA
ENSMUSG00000000204	20558	Slfn4	38.6025383348119	-0.9745424068173	0.831868610836383	-1.1715100126659	0.241393835550311	0.481583702066633
ENSMUSG00000000214	21823	Th	1.56067827529492	0.910759628755798	1.25767309477729	0.72416244931842	0.468966008925035	NA
ENSMUSG00000000215	16334	Ins2	0.230181709173521	1.29713014079059	4.3174797567141	0.300436878429695	0.763843937249713	NA
ENSMUSG00000000216	20278	Scnn1g	0.0565294071429272	0.450636287739379	4.32804458550702	0.10412006596429	0.917074067068648	NA
ENSMUSG00000000223	13497	Drp2	130.953919834013	0.0132868886706928	0.245281961268169	0.0541698566090889	0.956799836351441	0.979438031177889
ENSMUSG00000000244	27027	Tspan32	23.1057125044415	0.515025061703124	0.310572980529755	1.65830607937828	0.0972557025749029	0.285468111753652
ENSMUSG00000000247	16870	Lhx2	3.07379113001885	0.254157669208664	0.830566796336246	0.306005092341509	0.759600768521706	NA
ENSMUSG00000000248	70809	Clec2g	0.969645337492934	1.96011734997088	1.55297374278571	1.26217030975349	0.206887509777509	NA
ENSMUSG00000000253	66355	Gmpr	1645.06614087173	0.0423701620351262	0.163064136369693	0.259837404952527	0.794989196658466	0.901288324607289
ENSMUSG00000000263	14654	Glra1	0	NA	NA	NA	NA	NA
ENSMUSG00000000266	23947	Mid2	92.5438392898417	-0.0385775201902915	0.152902833417556	-0.252300885000225	0.800808504127528	0.904689844375062
ENSMUSG00000000275	217069	Trim25	323.617164927785	-0.0955042149315885	0.146076511963079	-0.653795833759554	0.513243351005252	0.726237436537499
ENSMUSG00000000276	56077	Dgke	108.218325502702	0.125003953140233	0.244832659959003	0.510568945994237	0.609652925317225	0.791013257763533
ENSMUSG00000000278	74617	Scpep1	337.937821710225	0.597066777725196	0.159416098591139	3.74533552760264	0.000180152840685038	0.0132097722809431
ENSMUSG00000000282	17428	Mnt	189.256212851824	0.191150769404212	0.172777548952288	1.10634032351621	0.268579244738017	0.512204728887168
ENSMUSG00000000290	16414	Itgb2	489.598381439639	0.530016338685264	0.232515022397286	2.27949288274224	0.022637782573768	0.128500398192088
ENSMUSG00000000295	69692	Hddc2	98.7862219829281	0.404001350328138	0.195382098432288	2.06775008339952	0.0386635297235817	0.172640165184748
ENSMUSG00000000296	21987	Tpd52l1	237.321025083173	-0.21983631531155	0.152881802301843	-1.43794952703078	0.150448375628833	0.367634107626354
ENSMUSG00000000301	18618	Pemt	21.8306525164522	0.148929004266925	0.335177178235837	0.444329190462173	0.656804599768749	0.818731398368099
ENSMUSG00000000303	12550	Cdh1	6.92488130862406	-1.26452002523576	0.629653840511896	-2.00827811072784	0.0446137466034439	NA
ENSMUSG00000000305	12561	Cdh4	75.8575323675745	-0.219402522915059	0.366226796329648	-0.599089212242052	0.549113395077081	0.751104256419767
ENSMUSG00000000308	12716	Ckmt1	0.325888834394297	1.25499003501824	2.67640012123538	0.468909721330815	0.639134167328328	NA
ENSMUSG00000000317	12029	Bcl6b	234.798094730058	-0.12621423332064	0.319145015580741	-0.395476122636511	0.692491539848799	0.841996001518516
ENSMUSG00000000318	17312	Clec10a	141.030166364197	0.6383223540663	0.240423834014494	2.65498783297757	0.00793112691158829	0.07415469733379
ENSMUSG00000000320	11684	Alox12	44.433750125141	-0.154794282543935	0.324742663270954	-0.47666752801981	0.633598889224443	0.804250440494008
ENSMUSG00000000326	12846	Comt	620.057171543601	0.159409945509875	0.0972326740740803	1.63946890310168	0.101115641878353	0.29156794768554
ENSMUSG00000000339	66368	Rtca	209.704682664329	0.00690400111832454	0.120987853605419	0.057063588720573	0.954494541130682	0.978627286861291
ENSMUSG00000000340	13171	Dbt	403.827822970715	-0.160075946190538	0.144510593255038	-1.10771080918636	0.267986729659012	0.511600486847811
ENSMUSG00000000346	23994	Dazap2	1137.36809949169	-0.0778424005503553	0.0848012060402207	-0.917939781580879	0.358650393119292	0.599483484540927
ENSMUSG00000000355	68995	Mcts1	306.012615093912	0.132283290993318	0.123156452657839	1.07410767473821	0.282774425181209	0.52743972889245
ENSMUSG00000000359	19700	Rem1	61.329931627168	0.331288047951867	0.270198196517706	1.22609274311036	0.220163776413784	0.457115640353673
ENSMUSG00000000365	30054	Rnf17	1.209980672453	0.581989568214134	1.08171898168231	0.538022885859887	0.590561248753161	NA
ENSMUSG00000000374	216131	Trappc10	714.845305257524	-0.378140840349424	0.129836643904555	-2.91243541867427	0.00358622348966052	0.0490742500503084
ENSMUSG00000000378	216527	Ccm2	308.759028512315	0.0786376983210138	0.103959278211831	0.756427898246645	0.449392686563898	0.676822466510581
ENSMUSG00000000381	22373	Wap	0	NA	NA	NA	NA	NA
ENSMUSG00000000384	21379	Tbrg4	651.846425148321	-0.0186662350857722	0.0859928902855835	-0.217067190366336	0.82815598264617	0.918551593687355
ENSMUSG00000000385	50528	Tmprss2	0.861911949543352	-2.46002838293551	1.48019760456691	-1.66195944064866	0.0965209071314069	NA
ENSMUSG00000000386	NA	Mx1	30.4687790780097	0.330781343168311	0.529234019147047	0.625019048664754	0.531958556115272	0.739696827065134
ENSMUSG00000000392	14089	Fap	281.01685837696	0.540828413243149	0.195604454290249	2.76490847412216	0.0056938769279138	0.0625763640627891
ENSMUSG00000000394	14526	Gcg	0.0989994799489256	-0.992045240762961	4.32804458550702	-0.229213267369043	0.818703161198695	NA
ENSMUSG00000000399	66108	Ndufa9	2450.50850270448	-0.0108021361180704	0.130854383386296	-0.0825508159415748	0.934208710911486	0.969826690085671
ENSMUSG00000000402	54156	Egfl6	15.7930181534014	0.110505904512892	0.534837267294174	0.206615939595905	0.836309810874898	0.922000123673185
ENSMUSG00000000409	16818	Lck	9.00882001853487	0.408235654338233	0.504520859256661	0.809155155526592	0.418425905913796	NA
ENSMUSG00000000411	58864	Tssk3	0.156147198280558	0.450636287739379	4.32804458550702	0.10412006596429	0.917074067068648	NA
ENSMUSG00000000416	30785	Cttnbp2	11.6377908827451	-0.236705136299874	0.477300712871951	-0.495924539637921	0.619947651844034	NA
ENSMUSG00000000420	14423	Galnt1	979.451112760839	-0.168169032901197	0.100444258573802	-1.67425231953536	0.0940810209287656	0.281441475612464
ENSMUSG00000000435	17877	Myf5	34.5627881912119	-0.0748974726465658	0.294001124432282	-0.254752333995978	0.798914392711605	0.903621212916093
ENSMUSG00000000439	67027	Mkrn2	411.333584821325	-0.513076358606114	0.148313426740289	-3.45940600175439	0.000541368198975741	0.0202323095538777
ENSMUSG00000000440	19016	Pparg	78.301004374024	0.0643881424320774	0.24083133520029	0.267357826914543	0.789193667118642	0.898644867004943
ENSMUSG00000000441	110157	Raf1	574.10751108791	-0.459602195671689	0.180623244162722	-2.54453516103186	0.0109423294671136	0.0889656061853927
ENSMUSG00000000486	54204	Septin1	33.3547570092366	0.118774250501412	0.272373195105276	0.436071730390005	0.662784687131854	0.823588832608103
ENSMUSG00000000486	100043580	Septin1	33.3547570092366	0.118774250501412	0.272373195105276	0.436071730390005	0.662784687131854	0.823588832608103
ENSMUSG00000000489	18591	Pdgfb	652.080777804652	0.173925315100139	0.117613140176951	1.47879152651196	0.139196041222077	0.351218101136832
ENSMUSG00000000530	11482	Acvrl1	375.796846444914	0.0171910355062468	0.12659237971813	0.135798343822308	0.891980700371766	0.950315939021009
ENSMUSG00000000531	56149	Tamalin	143.174294245587	-0.136621871836676	0.187563796778319	-0.728402144674802	0.466367450803001	0.690826526991633
ENSMUSG00000000532	11479	Acvr1b	637.530525838427	-0.510493236902631	0.170903988507691	-2.98701768964074	0.00281713421116142	0.0434020838860458
ENSMUSG00000000538	216810	Tom1l2	1298.59981429715	-0.24373829505801	0.102392060659324	-2.38044134953948	0.0172919134671467	0.111615244063218
ENSMUSG00000000544	59290	Gpa33	0.116957234271917	0	4.32804458550702	0	1	NA
ENSMUSG00000000552	29813	Zfp385a	217.664534352372	0.586000930588328	0.141236135227646	4.14908641930627	3.3380478609976e-05	0.00742270576023834
ENSMUSG00000000555	16402	Itga5	589.154584769772	-0.160575466187158	0.291407683310954	-0.551033742016375	0.58161054428299	0.771510030008317
ENSMUSG00000000560	14395	Gabra2	0.16174283207461	1.20525244467686	4.32113980545955	0.278920030116611	0.780306196500901	NA
ENSMUSG00000000561	70465	Wdr77	183.245132696422	0.0588619695982258	0.148710579711732	0.395815615219353	0.692241056382396	0.841844879614796
ENSMUSG00000000562	11542	Adora3	3.06091214759279	0.0950155511209667	0.800707969979654	0.118664425337718	0.905541221820426	NA
ENSMUSG00000000562	69296	Adora3	3.06091214759279	0.0950155511209667	0.800707969979654	0.118664425337718	0.905541221820426	NA
ENSMUSG00000000563	11950	Atp5pb	6799.14666444183	-0.0437633156456254	0.131918582182287	-0.331744890838447	0.740081900424743	0.869086524382183
ENSMUSG00000000567	20682	Sox9	97.5011097416242	-0.280428130848139	0.365841996001818	-0.76652799272051	0.443362202349419	0.672688298654366
ENSMUSG00000000568	11991	Hnrnpd	638.006923790979	0.0714495101262913	0.165776192845127	0.430999825125925	0.666468497639213	0.8256444607283
ENSMUSG00000000579	100040563	Dynlt1c	32.639906695111	0.5479355152859	0.271367305335099	2.01916555352635	0.0434700152711525	0.182220457747382
ENSMUSG00000000581	57316	C1d	475.361252953916	-0.0173511599260006	0.145354565793763	-0.119371275551257	0.904981217340323	0.957041869106013
ENSMUSG00000000594	14667	Gm2a	573.93873320392	0.402501870773148	0.14592091758457	2.75835622086103	0.00580928544643153	0.0632714174908485
ENSMUSG00000000600	79264	Krit1	281.547666225407	-0.11849460963335	0.108431489027112	-1.0928062567113	0.274478873968231	0.518784124732135
ENSMUSG00000000605	12727	Clcn4	749.843900577642	-0.0383263885726796	0.0937402853302879	-0.408857178508034	0.682644475729231	0.836986362934019
ENSMUSG00000000606	669149	Vmn2r88	0	NA	NA	NA	NA	NA
ENSMUSG00000000617	108072	Grm6	0	NA	NA	NA	NA	NA
ENSMUSG00000000627	20355	Sema4f	4.43393884441103	-0.601392413768448	0.608161747141453	-0.98886918915104	0.322727146924574	NA
ENSMUSG00000000628	15277	Hk2	4041.83275800486	-0.608598719095435	0.216795406180812	-2.80724914709609	0.00499665794731138	0.0584271782059846
ENSMUSG00000000631	360013	Myo18a	3419.4282668175	-0.21225127515809	0.122515515157145	-1.73244404911365	0.0831945308803307	0.26141814201728
ENSMUSG00000000632	20370	Sez6	5.93678661427075	-0.689565129001398	0.660932458165318	-1.04332162913524	0.296799356931079	NA
ENSMUSG00000000673	107766	Haao	4.23256574749913	-0.378383543621898	0.687650153175777	-0.550255885022941	0.582143877535852	NA
ENSMUSG00000000682	23833	Cd52	158.610304653828	0.289223722179886	0.213882866144087	1.35225288212214	0.176294431839484	0.401659888934835
ENSMUSG00000000686	67477	Abhd15	6.85490627148391	0.00401169266583419	0.531214306246525	0.00755192888945361	0.99397448980899	NA
ENSMUSG00000000690	15414	Hoxb6	24.5071398758297	-0.0523314633251307	0.413852290298867	-0.126449616328906	0.899376029162237	0.953550141535487
ENSMUSG00000000693	16950	Loxl3	192.858570834673	0.305981651287596	0.167268613290859	1.82928312292236	0.0673572056149156	0.233909379831911
ENSMUSG00000000701	27382	Tcl1b5	0	NA	NA	NA	NA	NA
ENSMUSG00000000706	12231	Btn1a1	0.0928276859660398	0.450636287739379	4.32804458550702	0.10412006596429	0.917074067068648	NA
ENSMUSG00000000708	18519	Kat2b	867.174871686	-0.505135277988496	0.147112508029519	-3.43366641459975	0.000595476545347708	0.0208902281143727
ENSMUSG00000000711	19344	Rab5b	1262.0982098579	-0.230578797402327	0.113447778546975	-2.03246639427894	0.042106462541522	0.179311976772738
ENSMUSG00000000724	12957	Cryba1	0.139115662479491	0.450636287739379	4.32804458550702	0.10412006596429	0.917074067068648	NA
ENSMUSG00000000730	54427	Dnmt3l	1.99957770321308	-0.0552961417412075	1.04356576243089	-0.0529876925172406	0.957741713886305	NA
ENSMUSG00000000731	11634	Aire	0.285608651931866	-2.1238260058574	3.0800776820379	-0.689536506901408	0.490485707757325	NA
ENSMUSG00000000732	50723	Icosl	54.6180916652531	-0.20854452294091	0.237951184228004	-0.876417251788433	0.380803243043426	0.620578584180456
ENSMUSG00000000738	234847	Spg7	1233.62687627867	-0.155459542894215	0.110253384312548	-1.41002059812981	0.158533600840964	0.379297087648646
ENSMUSG00000000739	57429	Sult5a1	50.1422410140047	0.141102016355716	0.219283818921906	0.643467525554028	0.519920780047371	0.731419553710672
ENSMUSG00000000740	270106	Rpl13	4411.96599595338	0.250612277640497	0.120909830897583	2.07272043786728	0.0381983045882097	0.171984511345658
ENSMUSG00000000743	234852	Chmp1a	695.491543411109	0.0276520812568137	0.0707645015832315	0.390762043653907	0.695973133438421	0.843921980035937
ENSMUSG00000000751	68275	Rpa1	782.687543813676	0.0673476775235182	0.0966748892899283	0.696640854912617	0.486027581360658	0.705459093833104
ENSMUSG00000000753	20317	Serpinf1	1928.10910671401	0.446551649071149	0.169505110544181	2.63444357304352	0.00842753102863883	0.07659408650143
ENSMUSG00000000759	259279	Tubgcp3	191.044619566519	-0.151623271385736	0.143314460542948	-1.05797608148759	0.290066347083067	0.535052118092201
ENSMUSG00000000766	18390	Oprm1	0.116957234271917	0	4.32804458550702	0	1	NA
ENSMUSG00000000776	67065	Polr3d	302.94699525073	-0.255169189272976	0.126858271653748	-2.01145093612379	0.044277847783653	0.18429806112577
ENSMUSG00000000782	21414	Tcf7	25.1452812067836	0.262651197784038	0.347956354167908	0.754839492476389	0.450345294665893	0.677702111598506
ENSMUSG00000000787	13205	Ddx3x	2182.75597548658	-0.34821904549114	0.148772813472829	-2.34060939873761	0.0192522971395601	0.117571503154108
ENSMUSG00000000791	16161	Il12rb1	2.21306617313891	0.302212003682298	1.07170678485665	0.281991313251525	0.777950171147633	NA
ENSMUSG00000000792	114479	Slc5a5	5.79992450251267	1.25185419283989	0.693519840473427	1.80507336601259	0.0710632022129967	NA
ENSMUSG00000000794	140493	Kcnn3	77.4252268418712	0.00906577736799525	0.290216345543804	0.03123799712593	0.975079737365863	0.988108574378931
ENSMUSG00000000804	237898	Usp32	195.132756743292	-0.142215194590025	0.124274844355496	-1.14436027120026	0.252474257261532	0.49478724153692
ENSMUSG00000000805	12351	Car4	142.909933603794	-0.18093856790985	0.207615911442532	-0.871506266801393	0.383477785607648	0.622958798925756
ENSMUSG00000000811	232223	Txnrd3	105.836727646747	-0.16469588471551	0.149799704916529	-1.09944064847979	0.271575908764578	0.51521532866223
ENSMUSG00000000817	14103	Fasl	0.609863045767772	1.48415129775309	1.82270639324254	0.81425692215455	0.415497782314631	NA
ENSMUSG00000000823	269401	Zfp512b	246.659548708583	-0.329567998901581	0.157492856809601	-2.09259013759594	0.0363857577155367	0.167646921382814
ENSMUSG00000000826	13002	Dnajc5	800.335696285164	-0.0542166618455843	0.0903172269445278	-0.600291480150114	0.548311995773955	0.750536681107121
ENSMUSG00000000827	66314	Tpd52l2	560.463792455834	-0.0568650752571542	0.104055916311713	-0.546485747978113	0.584732081821437	0.772902456216936
ENSMUSG00000000838	14265	Fmr1	174.048220949428	0.0506722995764169	0.150644841879826	0.336369297110351	0.736592399327878	0.866862114477599
ENSMUSG00000000861	14025	Bcl11a	3.4641041437018	-0.510396590383088	0.725734205058071	-0.70328308466906	0.481879350088315	NA
ENSMUSG00000000869	16189	Il4	9.75071240952009	0.180283045707322	0.449629572039223	0.400959049222846	0.688450273976899	NA
ENSMUSG00000000876	59038	Pxmp4	216.895575511044	0.146368200392939	0.162519938271741	0.900616883992442	0.36779205436677	0.608425546139509
ENSMUSG00000000881	53310	Dlg3	60.2575746620107	0.279484310584288	0.222753784345822	1.25467817036227	0.209595613395929	0.443839845458749
ENSMUSG00000000884	13972	Gnb1l	23.7000487596544	0.078934569825011	0.301031992477845	0.262213225827884	0.793157057304283	0.900314910545665
ENSMUSG00000000889	13166	Dbh	4.12405640493018	1.34260732345233	0.954463109730766	1.40666235265085	0.159527534230146	NA
ENSMUSG00000000901	17385	Mmp11	76.8337326088006	0.396976153624665	0.272348101461034	1.45760573139689	0.144949248959135	0.359390460380856
ENSMUSG00000000902	20587	Smarcb1	321.259660350183	0.220139223771783	0.117584295611531	1.87218218748418	0.0611814025436377	0.222336769552042
ENSMUSG00000000903	22364	Vpreb3	0.719121200145294	1.39222494186825	1.64569080153446	0.845982088840823	0.397562736245623	NA
ENSMUSG00000000915	29816	Hip1r	158.4345319296	-0.426734647737868	0.219570784354764	-1.943494663882	0.0519564194948016	0.202572340414858
ENSMUSG00000000916	100609	Nsun5	117.21512274215	0.202377485760621	0.151074000622123	1.33959175587613	0.180378105527262	0.406246570551102
ENSMUSG00000000934	72960	Top1mt	119.13199468475	-0.21234876072047	0.151824806080013	-1.39864338511692	0.161919949386304	0.383786811993617
ENSMUSG00000000938	15395	Hoxa10	235.383666785393	-0.395114923347239	0.139953251213564	-2.82319217253701	0.00475480617045274	0.0565911007370031
ENSMUSG00000000942	15401	Hoxa4	23.2672033450164	-0.234761243388146	0.323316543419592	-0.726103405984639	0.467775381197724	0.691990147016302
ENSMUSG00000000948	NA	Gm38393	6.28551839586349	-1.63222045478508	0.74217426114964	-2.19924152618381	0.0278607530438517	NA
ENSMUSG00000000957	17387	Mmp14	931.162548301933	0.617328081946741	0.188816902396873	3.26945349759623	0.00107755447568676	0.0267723125039344
ENSMUSG00000000958	20540	Slc7a7	56.8646664717538	0.252247674966889	0.246727069368403	1.02237535432419	0.30660328061713	0.550638657073544
ENSMUSG00000000959	69089	Oxa1l	706.059533854043	0.00471215118341064	0.101444168621973	0.0464506856078661	0.9629510388088	0.982539978570435
ENSMUSG00000000976	217026	Heatr6	199.582276610142	-0.178351487382188	0.142239011216629	-1.25388587741628	0.209883488917329	0.443929059565255
ENSMUSG00000000982	20302	Ccl3	7.39257379712027	0.637275728866492	0.468390007888335	1.3605664470503	0.173650740999421	NA
ENSMUSG00000000983	14038	Wfdc18	0.954244691032544	-0.893918701264085	2.06199153238309	-0.433522003958457	0.664635584048668	NA
ENSMUSG00000001014	78369	Icam4	0	NA	NA	NA	NA	NA
ENSMUSG00000001016	67781	Ilf2	355.868259264408	0.171031819552042	0.11841292774873	1.44436779668998	0.148635544270572	0.365176066845218
ENSMUSG00000001017	66511	Chtop	1572.68194223628	0.00419484419876587	0.0777534431198137	0.0539505908735366	0.956974529638357	0.979438031177889
ENSMUSG00000001018	20615	Snapin	906.566279631255	-0.187229274880087	0.0984783131696096	-1.90122341512513	0.0572727553662169	0.213923040900354
ENSMUSG00000001020	20198	S100a4	4.65302926955875	0.189506104198817	0.619385822625141	0.305958091510124	0.759636554694019	NA
ENSMUSG00000001021	20197	S100a3	0.87363784746585	-0.0232340248250857	1.55847290387507	-0.0149081994093804	0.988105418467383	NA
ENSMUSG00000001023	20199	S100a5	0.505656921058343	0	2.36483203679279	0	1	NA
ENSMUSG00000001025	20200	S100a6	1259.1736160417	0.471442531710783	0.198900704923337	2.37024062781724	0.0177765116806037	0.112909374164742
ENSMUSG00000001027	110880	Scn4a	4432.31494866847	-0.815592706247342	0.210062645179047	-3.88261656684448	0.000103338450647355	0.0102360355467055
ENSMUSG00000001029	15896	Icam2	110.777166790376	-0.0989721865760206	0.176709297136613	-0.560084773012851	0.575421616112568	0.767975125692981
ENSMUSG00000001034	23939	Mapk7	129.952437659065	0.25209888790184	0.152368836824926	1.65453050082351	0.0980197713589898	0.287045607873495
ENSMUSG00000001036	13855	Epn2	417.515356399736	-0.32430319856872	0.135848487247517	-2.38724188350981	0.0169753183712171	0.110913172237404
ENSMUSG00000001039	27078	B9d1	28.4159858298159	0.360016029914097	0.263729597523729	1.36509528431561	0.172223104002158	0.39576311636183
ENSMUSG00000001052	99683	Sec24b	358.528773174425	-0.319484268444258	0.158111425567116	-2.02062733479461	0.0433183570996238	0.182019593560758
ENSMUSG00000001053	212706	N4bp3	114.022764318814	0.125052249201338	0.142161035626586	0.879652069571389	0.379047822043017	0.619306397464845
ENSMUSG00000001054	66089	Rmnd5b	196.20414548108	0.0285901010376047	0.114530130386091	0.249629516191285	0.802873870449598	0.905985678524646
ENSMUSG00000001056	52530	Nhp2	366.032079912132	0.426549586090295	0.191284047271819	2.22992765039187	0.0257522463989893	0.138584934659326
ENSMUSG00000001062	72325	Vps9d1	281.270716359808	-0.0503504957648888	0.100678691999729	-0.500110746025825	0.616997099939538	0.795301855773111
ENSMUSG00000001065	57247	Zfp276	83.7398155068339	0.0672522063200678	0.186947881674812	0.359737728598874	0.719043274937966	0.858378958814702
ENSMUSG00000001076	239659	C1ql4	0	NA	NA	NA	NA	NA
ENSMUSG00000001082	68294	Mfsd10	106.460540505131	0.42168829602722	0.194434258508071	2.16879627727597	0.0300981540046101	0.149469526228918
ENSMUSG00000001089	269593	Luzp1	312.953729408674	-0.2394312967597	0.156477293791615	-1.53013444288318	0.125983454297924	0.333175668432686
ENSMUSG00000001095	20500	Slc13a2	0.383029186547402	-1.04888781353706	2.2993478859726	-0.456167515988294	0.648269522612053	NA
ENSMUSG00000001098	330171	Kctd10	189.008638886712	-0.355388339589095	0.197318497771938	-1.80108982990462	0.0716887224511063	0.241705790292497
ENSMUSG00000001100	67811	Poldip2	1208.8187402489	-0.113497625622869	0.0891489869365241	-1.27312299918429	0.202974398827958	0.43524339909396
ENSMUSG00000001103	18292	Sebox	0.989200270856634	-0.638452782536283	1.69696491177908	-0.376232164910785	0.706744304967255	NA
ENSMUSG00000001105	55978	Ift20	240.478580257813	0.290310104867385	0.134666846921203	2.15576521990786	0.0311020025622131	0.152056767381842
ENSMUSG00000001119	12833	Col6a1	4086.13493011716	0.470380748525027	0.126428912435526	3.72051565946122	0.000198816413062772	0.0135767011581575
ENSMUSG00000001120	59093	Pcbp3	43.0230958529146	-0.0121351565925291	0.2611882075193	-0.0464613494911801	0.962942539437404	0.982539978570435
ENSMUSG00000001123	16859	Lgals9	333.878244404432	0.432381515842345	0.151107612613562	2.86141451356329	0.00421755226949862	0.0533276712999714
ENSMUSG00000001127	11836	Araf	1015.25943744729	-0.045436490409592	0.0956613998123223	-0.474972042001619	0.634806900890647	0.805017932865983
ENSMUSG00000001128	18636	Cfp	335.017383554104	0.554949699535171	0.258678060574244	2.14532959735057	0.0319265036778924	0.154726993124025
ENSMUSG00000001131	21857	Timp1	290.355158064121	0.430431287966874	0.426234856451633	1.00984535040183	0.312569388791039	0.55659490588276
ENSMUSG00000001134	22294	Uxt	59.6369833339592	-0.0265519552774864	0.18227220650248	-0.145671991286972	0.884180333184427	0.946388608531619
ENSMUSG00000001138	94218	Cnnm3	187.327472948681	-0.427577228776149	0.126507721669278	-3.37985083546078	0.000725251792140087	0.023188018396778
ENSMUSG00000001143	214895	Lman2l	390.995386174561	0.155845470450077	0.103748714578641	1.50214362735016	0.133060019811971	0.343410949702277
ENSMUSG00000001150	54387	Mcm3ap	328.381449285603	-0.220269413544644	0.143575005059083	-1.53417660305149	0.124986211952943	0.331655934740685
ENSMUSG00000001151	18541	Pcnt	751.109073775722	-0.511006641782132	0.177046720389863	-2.88628131973796	0.00389823542732611	0.0516340623172885
ENSMUSG00000001155	14317	Ftcd	1.22025213328334	0.0862864955921763	1.25738364365881	0.0686238412813251	0.945289041000907	NA
ENSMUSG00000001156	17119	Mxd1	99.541449374217	-0.620681654521957	0.243826285880697	-2.54558958760358	0.0109093366451768	0.0888497346696819
ENSMUSG00000001157	23885	Gmcl1	84.9551013209757	0.1876506618878	0.174741627098572	1.07387498333151	0.282878717018933	0.527499921322988
ENSMUSG00000001158	66618	Snrnp27	667.778802453468	0.167089533016667	0.144904140468855	1.15310392426351	0.248867731117191	0.491081076444829
ENSMUSG00000001166	114643	Oas1c	7.60739608448379	0.772537984067622	0.628710219543218	1.22876638561546	0.219159407992616	NA
ENSMUSG00000001168	246729	Oas1h	0.398771477681502	0.610830782064277	3.38712189363817	0.18033917917497	0.856886299322355	NA
ENSMUSG00000001173	320634	Ocrl	263.80134909598	-0.090161199133738	0.145978171200389	-0.617634803836327	0.536816097058489	0.742776730589646
ENSMUSG00000001175	12313	Calm1	7796.88381735573	0.0490665951591207	0.0790812132463023	0.620458300333612	0.534956099574136	0.74146938297508
ENSMUSG00000001211	28169	Agpat3	1633.6503055771	-0.0737882907858086	0.0826291059571292	-0.893006041044333	0.371853937571159	0.612125260342307
ENSMUSG00000001225	13487	Slc26a3	0.0362982788231126	0	4.32804458550702	0	1	NA
ENSMUSG00000001227	20359	Sema6b	146.010556188415	-0.49984883822034	0.302762199351768	-1.65096184163857	0.0987463667951745	0.288287532993702
ENSMUSG00000001228	18140	Uhrf1	64.0770219340588	0.781947331047928	0.685907543228181	1.14001856193	0.254278568018182	0.496853419321814
ENSMUSG00000001229	224897	Dpp9	718.615763211763	-0.380633810068075	0.145459674406056	-2.61676517304392	0.00887673859457044	0.079229552795688
ENSMUSG00000001240	54409	Ramp2	321.995735736109	0.242266177218499	0.116569621223629	2.07829599749434	0.0376821048790801	0.1713546841502
ENSMUSG00000001247	54135	Lsr	6.06133596789215	0.0722273154930042	0.557067983744501	0.129656195654086	0.896838440737977	NA
ENSMUSG00000001248	52857	Gramd1a	566.049426790463	0.00908873557344938	0.101076057718802	0.0899197671394607	0.928350972877715	0.96705642412043
ENSMUSG00000001249	15451	Hpn	83.3725719764553	-0.0180600179249764	0.208105695774626	-0.0867829102790876	0.930844071989393	0.968173972125609
ENSMUSG00000001260	14405	Gabrg1	0.54545050767499	-1.57915188901282	2.06935498274332	-0.763113096680667	0.445395950079108	NA
ENSMUSG00000001270	12709	Ckb	602.365690356861	1.17620296229267	0.286462749718389	4.10595431150804	4.02649067581429e-05	0.00793820870975318
ENSMUSG00000001280	20683	Sp1	299.347577632968	0.020682486893728	0.0993655690355963	0.208145407855701	0.835115433153477	0.921673431146802
ENSMUSG00000001281	16421	Itgb7	73.3910997806084	0.172093071508478	0.255230966836511	0.674264073993469	0.500143440135873	0.71551723979121
ENSMUSG00000001285	60315	Myg1	122.450530816099	0.263636694067831	0.170895097126845	1.54268143732731	0.122908087915619	0.328625192178395
ENSMUSG00000001288	19411	Rarg	285.592805959421	0.357482586972999	0.173418435538962	2.06138745204332	0.0392660909965745	0.173530369684099
ENSMUSG00000001289	56612	Pfdn5	856.139206344024	0.194688588032759	0.137518243625553	1.41572916363646	0.156854816285193	0.376775344459457
ENSMUSG00000001300	13642	Efnb2	178.643375413675	-0.240269260006434	0.227168667334929	-1.05766901230349	0.29020636738908	0.535052118092201
ENSMUSG00000001305	67223	Rrp15	134.799511977674	0.204532007467398	0.169748894908591	1.2049092135624	0.228238351375441	0.466587638682754
ENSMUSG00000001313	11858	Rnd2	44.193693180827	0.281880595418399	0.226756777107122	1.24309667395403	0.213832211300495	0.449212622133711
ENSMUSG00000001323	27364	Srr	95.4611609740373	-0.228749736065873	0.17361598209158	-1.31756151311698	0.187650476448482	0.416325384059964
ENSMUSG00000001333	68828	Sync	361.593105636047	-0.572404468727249	0.210103881015797	-2.72438788831422	0.00644207976533375	0.0663196205471319
ENSMUSG00000001334	384061	Fndc5	1509.00676948455	0.0501868408950804	0.221082043736612	0.2270055045939	0.820419461853863	0.91502047106941
ENSMUSG00000001348	11433	Acp5	156.717208122399	0.663432239152373	0.540428005826052	1.22760521660662	0.219595202595385	0.456275859793402
ENSMUSG00000001349	12797	Cnn1	47.1373392998995	0.251096777594175	0.324393679890103	0.774049536597757	0.438901497827966	0.669697719586895
ENSMUSG00000001366	71538	Fbxo9	498.17957444293	-0.100525211298756	0.11165370929261	-0.900330243711925	0.367944530850445	0.608542944168419
ENSMUSG00000001376	73288	Vps50	321.130829533302	-0.067822460065502	0.101372118143362	-0.669044519416929	0.503467079395894	0.717809123028427
ENSMUSG00000001380	15115	Hars	380.730184131285	0.182945410688546	0.125776926755436	1.45452282392199	0.145801410334545	0.36054639204312
ENSMUSG00000001383	66492	Zmat2	767.639176593065	0.187936470729786	0.116804575458104	1.60898209674325	0.10762025642883	0.302467936442997
ENSMUSG00000001403	68612	Ube2c	84.652822261557	1.35123987062427	0.414930968880546	3.2565413814973	0.00112778489970704	0.0273083595860096
ENSMUSG00000001415	229512	Smg5	824.594176174494	-0.164453008826683	0.106436562723102	-1.54508004222676	0.122326903762734	0.327545260733256
ENSMUSG00000001416	12462	Cct3	1269.05241392317	0.124311659242042	0.135836901403086	0.915153820191731	0.360110883991275	0.601176102879328
ENSMUSG00000001418	56700	Glmp	409.102924653353	0.375340507181193	0.120732043460025	3.10887231280461	0.0018780286191422	0.0356579075534541
ENSMUSG00000001419	17261	Mef2d	2443.03694943856	-0.371631537183834	0.13937251978919	-2.66646206688342	0.0076654256400474	0.0729375354843896
ENSMUSG00000001420	71913	Tmem79	23.2490460402439	-0.602098247058249	0.380681073419029	-1.58163431044942	0.113733076668549	0.312549270630645
ENSMUSG00000001424	56463	Snd1	814.684332145848	0.191308934117691	0.114317333324404	1.6734901747122	0.0942308391662528	0.281763302589903
ENSMUSG00000001435	12822	Col18a1	550.638933064166	0.428635308962373	0.129928361636544	3.29901265253709	0.000970255379921725	0.025753227795149
ENSMUSG00000001436	20509	Slc19a1	90.8919542759088	0.287352261266002	0.183376707867551	1.56700523532984	0.117113467901465	0.318818177666058
ENSMUSG00000001440	16211	Kpnb1	1161.010206973	-0.125406479564566	0.169438200404407	-0.740131087707796	0.459220456976073	0.684571992958074
ENSMUSG00000001441	19155	Npepps	1414.39946370033	0.0244398656031045	0.0851960181012498	0.286866289620007	0.774214703107649	0.890173437509674
ENSMUSG00000001444	57765	Tbx21	11.1065053882421	0.703172440295497	0.429665233063052	1.63655885137048	0.101722679426238	NA
ENSMUSG00000001445	107732	Mrpl10	324.955450024313	-0.0838043452431991	0.102379858874045	-0.81856281269445	0.413035891121765	0.65023302175181
ENSMUSG00000001467	13121	Cyp51	147.8554078214	-0.0572590175713673	0.30091944688	-0.190280216732556	0.849089555200478	0.92896717535261
ENSMUSG00000001472	66855	Tcf25	2439.68174211818	-0.1042708689501	0.0831346243796485	-1.2542411748194	0.20975435807388	0.443929059565255
ENSMUSG00000001473	67951	Tubb6	1191.58480456148	0.334146777440133	0.253934157718288	1.31587959824937	0.188214457383873	0.41699722524338
ENSMUSG00000001482	23854	Def8	519.213211117385	-0.0902057457423689	0.127444405838094	-0.70780467097918	0.479066565291157	0.700460944012561
ENSMUSG00000001493	17285	Meox1	142.151004483661	0.813972997692382	0.223859988136637	3.63608076846479	0.000276817569370671	0.0157161702576319
ENSMUSG00000001494	74499	Sost	0	NA	NA	NA	NA	NA
ENSMUSG00000001496	21869	Nkx2-1	0	NA	NA	NA	NA	NA
ENSMUSG00000001497	18511	Pax9	4.68485873865514	-0.166805672573014	0.719321000400351	-0.231893233313327	0.816620940327849	NA
ENSMUSG00000001504	16372	Irx2	1.5429866678905	0.0939667538284904	1.07712355265302	0.0872386028483404	0.93048185567215	NA
ENSMUSG00000001506	12842	Col1a1	16044.7091031422	0.67726042065957	0.191648455102209	3.53386840660091	0.000409524918558544	0.0183351726960003
ENSMUSG00000001507	16400	Itga3	131.488111539792	-0.493084363762707	0.295278035027445	-1.66989855414365	0.0949394364643174	0.282669051355776
ENSMUSG00000001508	20391	Sgca	643.847517192031	0.35105346493733	0.208503290921323	1.68368308905876	0.0922429312597023	0.278017878473335
ENSMUSG00000001510	13393	Dlx3	0.167772542577505	0.507827057213277	4.29299199697817	0.118292104334398	0.905836213303908	NA
ENSMUSG00000001517	14235	Foxm1	29.4174424014623	0.735796158861851	0.523083212806197	1.40665221297107	0.15953054237244	0.380557213719489
ENSMUSG00000001518	101142	Itfg2	149.73914702531	0.0383165198593224	0.138210777201989	0.277232504114528	0.781601582714329	0.893737428571698
ENSMUSG00000001520	60345	Nrip2	31.18603081948	-0.0999997759857395	0.288968878053445	-0.3460572524604	0.72929968844595	0.863688659972117
ENSMUSG00000001521	22158	Tulp3	168.117671519621	0.109731147131169	0.118703334213587	0.9244150373546	0.355270268489693	0.59689370026129
ENSMUSG00000001524	14885	Gtf2h4	159.268909480544	0.242053851572462	0.140653867580527	1.72091856225625	0.0852656027404178	0.265127245668493
ENSMUSG00000001525	22154	Tubb5	1682.13383121198	0.615520847473305	0.267596794232661	2.30018019923715	0.0214380131375377	0.124658449423071
ENSMUSG00000001542	192657	Ell2	357.304891721181	-0.927144409203542	0.429660742642552	-2.15785227084351	0.0309393193801669	0.151539059900949
ENSMUSG00000001552	16480	Jup	1550.16643023151	-0.111616471336132	0.14170899243663	-0.787645649135812	0.430904005218161	0.662646523469422
ENSMUSG00000001555	14230	Fkbp10	236.292669331096	0.546402850399355	0.184273569636584	2.96517211598465	0.00302513628296423	0.0453328571678875
ENSMUSG00000001558	66720	Klhl10	2.99898150317331	0.842321604542161	0.860890802346808	0.978430251834464	0.327861572134893	NA
ENSMUSG00000001566	15285	Mnx1	0	NA	NA	NA	NA	NA
ENSMUSG00000001569	433864	Nom1	226.039134310358	-0.221980894585349	0.114528361187338	-1.93821768061666	0.052596670553859	0.203809035572651
ENSMUSG00000001576	67458	Ergic1	593.279281659748	0.0449023844471504	0.117247758104348	0.382970089775092	0.701741941399804	0.847564328678536
ENSMUSG00000001583	83813	Tnk1	1.27290955095307	2.29446049182423	1.31144001846331	1.74957333886516	0.0801919635750881	NA
ENSMUSG00000001588	216859	Acap1	19.9950775597398	-0.373087863069143	0.394475044539506	-0.945783182570322	0.344259184984913	0.587847410175002
ENSMUSG00000001604	21401	Tcea3	2016.82335671812	-0.385783333531324	0.150141323714865	-2.56946804507977	0.0101854785105154	0.0858754027380025
ENSMUSG00000001622	12994	Csn3	0	NA	NA	NA	NA	NA
ENSMUSG00000001627	15982	Ifrd1	534.689033680131	-0.307754964497424	0.185470330626808	-1.65932180881626	0.0970509629266305	0.285232325989213
ENSMUSG00000001630	232533	Stk38l	170.413883851556	-0.220337922775396	0.141585335519332	-1.5562199430273	0.119655800645825	0.32290806991464
ENSMUSG00000001632	78783	Brpf1	216.880863245472	-0.0864835262914188	0.136981442465163	-0.631352135990341	0.527810304645503	0.736307516162724
ENSMUSG00000001642	11677	Akr1b3	1825.52072131376	0.0609174256158768	0.124618139522188	0.488832732132312	0.624960122531176	0.799598959993379
ENSMUSG00000001655	15422	Hoxc13	0.092313825770329	0	4.32804458550702	0	1	NA
ENSMUSG00000001656	109663	Hoxc11	85.1561023965686	-0.212437064213509	0.187191518706713	-1.1348647934544	0.256431973162494	0.498762406073896
ENSMUSG00000001657	15426	Hoxc8	79.521624201969	0.40062084635851	0.224556867020304	1.78405074703098	0.0744154194870907	0.245633480157537
ENSMUSG00000001661	15425	Hoxc6	156.454867075702	0.0767291452637627	0.207864938163906	0.369129810643006	0.712030969871883	0.853906376841714
ENSMUSG00000001663	14871	Gstt1	89.5974665490188	0.306736146662166	0.170083953913187	1.80343965203636	0.0713191950178252	0.241143364403861
ENSMUSG00000001665	103140	Gstt3	33.7043672376948	0.327975631698892	0.247163555174888	1.3269578982501	0.184522610110844	0.412309607117549
ENSMUSG00000001666	13202	Ddt	30.1300635008481	-0.0634595966602151	0.325589930177989	-0.19490650901127	0.845466138464178	0.927235420999407
ENSMUSG00000001670	234724	Tat	0.747171809525318	-3.77467228500661	2.12355089938678	-1.77752851890512	0.0754813228758744	NA
ENSMUSG00000001672	73608	Marveld3	0.579779609175821	-1.28487997301323	1.78065554804401	-0.72157693520492	0.470554623960735	NA
ENSMUSG00000001674	66942	Ddx18	282.726373133564	0.164878976231743	0.159144022249708	1.03603625132106	0.30018523061357	0.545128094604506
ENSMUSG00000001687	24109	Ubl3	1324.84727889711	-0.120928032752435	0.0962417856993978	-1.25650237964352	0.20893388369915	0.443219477722658
ENSMUSG00000001700	107022	Gramd3	225.073432634957	-0.245362050578799	0.13500113624786	-1.81748137384799	0.0691434377944354	0.236966798626601
ENSMUSG00000001707	66143	Eef1e1	192.907430545151	-0.0618773578166455	0.150848808630873	-0.410194540999388	0.681663245094388	0.836370075711852
ENSMUSG00000001729	11651	Akt1	1176.44248874872	0.0248775357758155	0.102453199912836	0.242818533701051	0.808145977370344	0.909155922358209
ENSMUSG00000001739	60363	Cldn15	55.8560390617201	-0.354338821130398	0.207692810155699	-1.70607167799773	0.0879947349716295	0.269890977929076
ENSMUSG00000001741	16170	Il16	71.685941143975	0.628518657606197	0.303175279430951	2.07311974375319	0.0381611369823252	0.171984511345658
ENSMUSG00000001750	27060	Tcirg1	467.442245388674	0.703788521843409	0.209779472624545	3.35489699272446	0.000793945420511118	0.0242383903890047
ENSMUSG00000001751	27419	Naglu	174.364468249577	0.614329448807163	0.189378827432457	3.24391832569704	0.00117897546990384	0.0278835921016084
ENSMUSG00000001755	71743	Coasy	159.699090463153	0.124008212515312	0.132640201569778	0.934921773698263	0.349828615032769	0.592536927988727
ENSMUSG00000001761	319757	Smo	175.891392831155	0.222520250020066	0.148028362600154	1.5032271256092	0.132780484883431	0.343091217808565
ENSMUSG00000001763	232670	Tspan33	36.6589191046672	0.102743764150217	0.227542786871559	0.451536019061825	0.651603271124589	0.815466733265572
ENSMUSG00000001767	66877	Crnkl1	245.229745442704	-0.00110790655011445	0.105335581059926	-0.010517875716508	0.991608104080214	0.996066821308677
ENSMUSG00000001768	74030	Rin2	365.702214911865	0.428021643967462	0.185920026433935	2.30218149264063	0.0213249392277761	0.12421497791351
ENSMUSG00000001768	408057	Rin2	365.702214911865	0.428021643967462	0.185920026433935	2.30218149264063	0.0213249392277761	0.12421497791351
ENSMUSG00000001773	53320	Folh1	0.93298487579555	-0.207550267830303	1.5678481715344	-0.13237906042087	0.894684476268519	NA
ENSMUSG00000001774	66917	Chordc1	712.867344874688	-0.0349941694733514	0.105354345013234	-0.332156869932187	0.739770809400353	0.868916466151907
ENSMUSG00000001783	28088	Rtcb	539.372531552635	0.271202832184157	0.109826417035937	2.4693770360861	0.0135348526431212	0.0989490432682322
ENSMUSG00000001785	103136	Pwp1	278.864392371956	-0.243689601469824	0.11556846977295	-2.10861666636743	0.0349776831160361	0.163400647105796
ENSMUSG00000001786	69754	Fbxo7	97.1062788715259	-0.00326151338445199	0.156215173569416	-0.0208783392158938	0.983342705659674	0.992402890335531
ENSMUSG00000001794	12336	Capns1	2599.5892640316	0.150617699889935	0.0909180084385957	1.65663219505802	0.0975938591492007	0.286112342071772
ENSMUSG00000001802	435965	Lrp3	158.404973452139	-0.223664185818647	0.136669583368201	-1.63653228689572	0.1017282341169	0.292575576544014
ENSMUSG00000001804	16769	Dsg4	0	NA	NA	NA	NA	NA
ENSMUSG00000001815	14029	Evx2	1.63587951771351	0.52454054496653	1.221443436543	0.429443172948815	0.667600740808833	NA
ENSMUSG00000001819	15433	Hoxd13	1.32465530317658	-2.11179312169883	1.61127953390107	-1.31063113337384	0.189982415511275	NA
ENSMUSG00000001823	15432	Hoxd12	0	NA	NA	NA	NA	NA
ENSMUSG00000001827	14275	Folr1	4.36515454502303	0.658735555668975	0.85871391002723	0.767118766770747	0.44301090492766	NA
ENSMUSG00000001829	20480	Clpb	780.720904599454	-0.319186043582119	0.101276103463121	-3.15164222030273	0.00162355075085948	0.0327211693624882
ENSMUSG00000001833	235072	Septin7	1275.3615972165	-0.121163515495624	0.0864087574482323	-1.40221337597885	0.160851538523704	0.38255441742932
ENSMUSG00000001844	72881	Zdhhc4	260.986509121093	-0.0924028598947897	0.106679604868816	-0.866171748652589	0.386395983623252	0.625919630572055
ENSMUSG00000001847	19353	Rac1	2113.40661858972	-0.239602751119546	0.121511756903816	-1.97184829867291	0.0486269268295295	0.19494605100949
ENSMUSG00000001855	227720	Nup214	172.403973877888	-0.298262765381917	0.162253483375059	-1.8382518462945	0.0660253031881012	0.232504650612618
ENSMUSG00000001864	108897	Aif1l	206.802269066287	0.50619784880498	0.339077530485318	1.49286756949204	0.135471855732324	0.34625775846373
ENSMUSG00000001865	12873	Cpa3	56.3399407996103	0.555238677522841	0.193952521497575	2.86275565399021	0.00419974299663956	0.0532126980637844
ENSMUSG00000001870	268977	Ltbp1	314.115173975486	0.112687210251385	0.13591464160525	0.829102802468285	0.407046238091726	0.6446831562939
ENSMUSG00000001891	216558	Ugp2	5874.42625149506	-0.314674745443548	0.151527194923718	-2.07668825125391	0.0378303416601872	0.171486259118844
ENSMUSG00000001901	192775	Kcnh6	0	NA	NA	NA	NA	NA
ENSMUSG00000001909	212528	Trmt1	485.613118613773	-0.165497715039775	0.11689313519698	-1.41580354364601	0.15683303178579	0.376775344459457
ENSMUSG00000001910	66830	Nacc1	527.285373132408	-0.000874595103951032	0.135499848485722	-0.00645458363035136	0.994850023134379	0.997664652457441
ENSMUSG00000001911	18032	Nfix	4272.27942257137	-0.0125547247023577	0.102200670291892	-0.122843858719326	0.902230743020579	0.955597073538918
ENSMUSG00000001918	20514	Slc1a5	611.25359331429	0.175909135637659	0.161870690883003	1.08672629169664	0.277157790977644	0.521925087822686
ENSMUSG00000001924	22201	Uba1	2565.48359911029	-0.0284515648156895	0.0740453758873473	-0.384244991327693	0.700796874746146	0.847207748116978
ENSMUSG00000001930	22371	Vwf	484.750668725807	-0.13643767990976	0.16491887793063	-0.827301771766541	0.408066039799053	0.645608573817024
ENSMUSG00000001942	22619	Siae	131.381053329917	0.0717435175193456	0.136754708619901	0.524614605547155	0.599851131360238	0.784474984768506
ENSMUSG00000001943	57276	Vsig2	61.2148042364244	-0.866969886765732	0.318876491836807	-2.71882659575114	0.00655139434194935	0.0671706584572274
ENSMUSG00000001946	69524	Esam	499.661440027062	-0.368032124578191	0.138908802482126	-2.64945142425764	0.00806225612498599	0.0749266401184449
ENSMUSG00000001948	20686	Spa17	23.3440187600883	0.188649768195529	0.35516850640791	0.531155676226722	0.595310905022396	0.780603252561062
ENSMUSG00000001962	108160	Fam50a	245.095921070829	0.000823294684128605	0.135844052999941	0.00606058687110112	0.995164380908785	0.997664652457441
ENSMUSG00000001964	13726	Emd	344.397391645708	-0.296195684103752	0.18968008487757	-1.56155394117909	0.118393107101473	0.32092662229741
ENSMUSG00000001983	70207	Taco1	405.248160598939	-0.112622571782203	0.147285898005188	-0.764652782836248	0.444478329573147	0.673008828504753
ENSMUSG00000001985	14807	Grik3	2.2806594193222	-1.00917179473009	0.984956548968475	-1.02458509036462	0.305559002506024	NA
ENSMUSG00000001986	53623	Gria3	37.7039062748923	0.246919821426831	0.239287002866929	1.03189817444513	0.302119821266405	0.546856960430928
ENSMUSG00000001988	18142	Npas1	5.36967179637158	-0.648098988228617	0.733984385872732	-0.88298743229804	0.37724306184399	NA
ENSMUSG00000001995	244668	Sipa1l2	180.069875656384	-0.0140961499007425	0.144225450948499	-0.0977369098729738	0.922141206011869	0.964427998009748
ENSMUSG00000001998	108011	Ap4e1	104.556021138723	-0.597874168254808	0.219267469506987	-2.72668886816226	0.00639733293230175	0.0662444248560651
ENSMUSG00000001999	109778	Blvra	175.562932785729	0.361458995518717	0.163982487512746	2.20425364318627	0.0275065111053866	0.142961806693293
ENSMUSG00000002006	245469	Pdzd4	37.5134204968943	0.260709339148179	0.222818759544856	1.17005111993586	0.241980397410444	0.482514192534769
ENSMUSG00000002007	56504	Srpk3	563.309012750227	0.2688205445377	0.181195646158301	1.48359273656524	0.137916997496391	0.349428139118277
ENSMUSG00000002010	15929	Idh3g	3482.50713159145	-0.213189956613014	0.1001376009531	-2.12897008300471	0.0332567356652997	0.158400475374831
ENSMUSG00000002012	93843	Pnck	133.775645967425	0.356520706530534	0.250497096922288	1.42325284768125	0.154662870575743	0.37362158595357
ENSMUSG00000002014	20832	Ssr4	614.322099819585	0.0328513525070783	0.0939010263834572	0.349850835207333	0.726450645867696	0.862625319003442
ENSMUSG00000002015	27061	Bcap31	725.843938518877	0.296419112001961	0.123489736003787	2.40035424476792	0.0163792123018992	0.109053806018847
ENSMUSG00000002017	72722	Fam98a	560.857674019357	-0.276138634059314	0.10622005005894	-2.59968465375499	0.00933094623685336	0.0812714189189469
ENSMUSG00000002020	16997	Ltbp2	110.043552104791	0.864338463511904	0.551782896206887	1.56644663952727	0.117244091477832	0.318976150893349
ENSMUSG00000002028	214162	Kmt2a	387.28478982014	-0.260111868852171	0.137039185901104	-1.89808387390657	0.0576850341143262	0.214820134189869
ENSMUSG00000002031	76568	Ift46	167.681258043168	0.249954814190333	0.157817803476653	1.58381886380336	0.113234945270471	0.311372761706229
ENSMUSG00000002032	71687	Tmem25	148.291646698147	0.105357350440281	0.19608835695658	0.537295289100772	0.591063658983017	0.777862629527659
ENSMUSG00000002033	12502	Cd3g	3.33825961669561	0.278846488134358	1.17246205472635	0.237829861538196	0.812013056924679	NA
ENSMUSG00000002043	67091	Trappc6a	54.2507268566541	0.296761149156423	0.269582641979118	1.10081697759832	0.270976321134225	0.514789417139801
ENSMUSG00000002052	20926	Supt6	768.660216471939	-0.263415719856377	0.144412534841243	-1.82405024706448	0.0681444761998685	0.235578235100646
ENSMUSG00000002055	54141	Spag5	63.6514852239179	0.519586467019729	0.342815381337926	1.51564514110163	0.129609106161096	0.338446486587769
ENSMUSG00000002057	15218	Foxn1	0.18311009680528	-0.938305191469887	4.15923067256995	-0.225595853016279	0.821515766526601	NA
ENSMUSG00000002058	22248	Unc119	104.013186070585	0.342018561535058	0.194099646103135	1.76207720313578	0.0780562543883308	0.252182137191266
ENSMUSG00000002059	19376	Rab34	129.206759169199	0.591774367932432	0.201145331584069	2.94202387533462	0.00326074785809911	0.0469918838855083
ENSMUSG00000002064	20316	Sdf2	449.82502147027	0.212671685807891	0.136672081344923	1.55607263542848	0.11969082122697	0.322935275391351
ENSMUSG00000002068	12447	Ccne1	23.6298204745338	0.918937479218475	0.657157077896247	1.39835285980677	NA	NA
ENSMUSG00000002076	74377	Hsf2bp	7.16127004616763	0.417957890028442	0.528795617602916	0.790395903663286	0.42929659375471	NA
ENSMUSG00000002083	170770	Bbc3	55.0183223439872	0.862664246825796	0.28091863831594	3.07086867570384	0.00213437003914173	0.0379660771049006
ENSMUSG00000002100	17868	Mybpc3	1.77654514913891	1.52448455756406	1.01453260981114	1.50264717252199	0.132930052091501	NA
ENSMUSG00000002102	19182	Psmc3	2636.1469674919	0.0989938786112045	0.0905534813762884	1.09320897558695	0.27430205709832	0.518596860678161
ENSMUSG00000002103	11432	Acp2	352.818043378163	0.368901291811428	0.104069434693002	3.54476117699365	0.00039296896751907	0.0181278777978
ENSMUSG00000002104	19400	Rapsn	363.235985743528	0.239404073363062	0.121170601707406	1.97576037413066	0.0481819233796937	0.194153796959189
ENSMUSG00000002105	68427	Slc39a13	371.21974930874	0.230890384884172	0.0931906667915959	2.4776127570856	0.0132264609203653	0.0979286579353572
ENSMUSG00000002107	14007	Celf2	1076.66253657331	0.272086874111384	0.122511992064688	2.22089992600657	0.0263577402534325	0.1399182232022
ENSMUSG00000002108	22259	Nr1h3	219.354468185205	0.115992257195694	0.119061923626021	0.974217899922664	0.32994835880157	0.575370901823268
ENSMUSG00000002109	107986	Ddb2	31.0456552549703	-0.820200499959299	0.264637431039323	-3.09933669148044	0.00193954470271807	0.0363722428456965
ENSMUSG00000002111	20375	Spi1	253.363374354508	0.864236203459306	0.205159631096973	4.21250612919461	2.52552859582906e-05	0.00730216926341316
ENSMUSG00000002129	67465	Sf3a1	337.476094945237	0.220296391309503	0.135487353088564	1.62595538467345	0.103959146743878	0.296667331080227
ENSMUSG00000002147	20852	Stat6	561.456913893905	-0.0802231706961923	0.104826756751764	-0.765292881150237	0.444097162152227	0.673005944733646
ENSMUSG00000002190	12745	Clgn	0.40239630922522	-0.708502413881103	2.56486004948649	-0.276234336459392	0.782368086141417	NA
ENSMUSG00000002204	16541	Napsa	27.8886309840098	0.449805395044711	0.283425303323623	1.5870333021435	0.112505102383019	0.310582055864731
ENSMUSG00000002205	101568	Vrk3	223.149997277747	-0.20589634847222	0.135408489892484	-1.52055715735183	0.128371004970097	0.336488398489399
ENSMUSG00000002210	71997	Smg9	223.976046226586	0.11616726477702	0.140211669826586	0.828513524735107	0.407379738724499	0.644981662995403
ENSMUSG00000002221	55982	Paxip1	152.568429659188	-0.19759506231012	0.140483917511398	-1.40653155044661	0.159566342658433	0.380574569851414
ENSMUSG00000002222	68477	Rmnd5a	1893.93937902673	-0.419441191383321	0.141189558514587	-2.97076636400126	0.00297057675651163	0.0449358674437394
ENSMUSG00000002227	17454	Mov10	82.3373224433338	0.507581033446989	0.229355184106312	2.213078528941	0.0268922321018841	0.14106376642575
ENSMUSG00000002228	71887	Ppm1j	503.517231470906	0.019640157777511	0.146363924871385	0.13418714888091	0.89325458771254	0.950686240368595
ENSMUSG00000002233	11853	Rhoc	788.630403698849	0.319183554336323	0.113232782611912	2.81882637672409	0.00481995818846668	0.0571117958708015
ENSMUSG00000002240	73779	Prr27	0	NA	NA	NA	NA	NA
ENSMUSG00000002249	21678	Tead3	169.216224821087	-0.149994680825029	0.167991125156725	-0.892872648391952	0.371925375958513	0.612167328650196
ENSMUSG00000002250	19015	Ppard	453.160319926903	-0.410265778217446	0.182231057269475	-2.25134938228869	0.0243634173897851	0.134012112218037
ENSMUSG00000002250	69050	Ppard	453.160319926903	-0.410265778217446	0.182231057269475	-2.25134938228869	0.0243634173897851	0.134012112218037
ENSMUSG00000002257	23853	Def6	47.3784124920275	0.590696521286724	0.196967124288581	2.998959970707	0.00270902896217596	0.042422376072009
ENSMUSG00000002265	18616	Peg3	842.382677953675	0.271257670996675	0.204915933060044	1.32375099849943	0.185585755035221	0.413784282032073
ENSMUSG00000002266	22776	Zim1	163.307885599801	-0.0140391677233645	0.251850421896465	-0.0557440706973918	0.955545690722914	0.979027077685848
ENSMUSG00000002274	70083	Metrn	19.1711940951204	0.245742331121565	0.350431835496672	0.701255725734139	0.483143438615413	0.7030319291097
ENSMUSG00000002279	76483	Lmf1	191.532361621227	0.313066027466036	0.137421030612375	2.27815223092821	0.0227175092343583	0.128705643593048
ENSMUSG00000002280	67563	Ciao3	417.354099116183	-0.00921912893986407	0.124000437665011	-0.074347551617275	0.940733840980001	0.972288396185233
ENSMUSG00000002289	57875	Angptl4	343.516700820684	-0.101127698539425	0.34343147285946	-0.294462524641149	0.768404495633828	0.886932501145993
ENSMUSG00000002297	27214	Dbf4	29.266348864332	0.897909792236052	0.454315990626292	1.97639927002844	0.0481095741727247	0.194038070922761
ENSMUSG00000002307	13163	Daxx	221.08932942547	-0.05983289975984	0.115286296791455	-0.518994029863528	0.603764904515184	0.78750917548554
ENSMUSG00000002308	54219	Cd320	169.374720888746	0.168186495163557	0.150858644232929	1.11486150507805	0.264909774984263	0.508550534941012
ENSMUSG00000002319	75751	Ipo4	314.669457437948	0.104441377413462	0.130891311725557	0.79792444614236	0.424914336070151	0.658903657815895
ENSMUSG00000002320	74140	Tm9sf1	260.735658532998	0.0939708001540162	0.108359178176656	0.867215880881055	0.385823736479355	0.625378470136891
ENSMUSG00000002324	56739	Rec8	9.97529717557244	1.05732164245132	0.64293437139873	1.64452499273148	0.100067806125061	NA
ENSMUSG00000002325	16391	Irf9	221.865369044843	0.0216744018089994	0.155569100069692	0.139323309058738	0.88919467154266	0.948790005634217
ENSMUSG00000002326	105446	Gmpr2	16.9084215407836	0.174763351532761	0.386388789044878	0.452299229397318	0.651053431017899	0.815390488748785
ENSMUSG00000002329	67881	Mdp1	287.797106590182	0.150100827288406	0.125242616107937	1.19848045300368	0.230730028272435	0.469483000947207
ENSMUSG00000002332	52585	Dhrs1	437.764065976178	0.245001310866318	0.125810133979468	1.94738931687571	0.051488077867478	0.201493239185239
ENSMUSG00000002341	13004	Ncan	1.7631064929002	1.7959226956243	1.81149949324621	0.991401158167592	0.321489734953418	NA
ENSMUSG00000002342	234371	Tmem161a	763.169748644689	-0.0842613239993752	0.0994671419555184	-0.847127225562154	0.396924211421076	0.635756142160551
ENSMUSG00000002343	76813	Armc6	134.209203896059	0.180596170463451	0.149731289463936	1.20613514456475	0.227765385779558	0.466080640655039
ENSMUSG00000002345	72368	Borcs8	85.9118363034991	0.212043779089801	0.18324728494317	1.1571455432781	0.24721290215482	0.489073923569041
ENSMUSG00000002346	73095	Slc25a42	435.421868103852	-0.463927280733019	0.148574852659515	-3.12251550264828	0.00179312661668627	0.0345774164818212
ENSMUSG00000002365	66616	Snx9	524.080725317959	-0.0665457516489731	0.112223579111434	-0.59297477567433	0.553198033453307	0.754062950790153
ENSMUSG00000002372	71810	Ranbp3	659.735117720658	0.0264271149827853	0.100166861729271	0.2638309169974	0.791910210048924	0.899651889333079
ENSMUSG00000002379	69875	Ndufa11	495.737367487425	0.00459377829553557	0.150926123831866	0.0304372641323056	0.975718326133536	0.988412386607473
ENSMUSG00000002384	12164	Bmp8b	0.387997887933151	-0.99205012673187	2.98025228028264	-0.332874546660119	0.739228983621711	NA
ENSMUSG00000002393	13864	Nr2f6	187.084403953686	0.182028164560648	0.152056539359982	1.19710842642361	0.231264296014466	0.469996685060929
ENSMUSG00000002395	67023	Use1	708.124709791972	0.283437601196051	0.133141343585038	2.12884738552318	0.033266889021148	0.158400475374831
ENSMUSG00000002396	77090	Ocel1	95.7354402619246	0.177282478652694	0.167147521252996	1.06063480525301	0.288855898655351	0.534079185124681
ENSMUSG00000002409	13549	Dyrk1b	653.480491605184	0.0164695942231246	0.162409672599603	0.101407717653172	0.919226810257075	0.963232789147474
ENSMUSG00000002413	109880	Braf	128.063983675475	-0.160832265131258	0.186025155831284	-0.864572667135001	0.387273379933493	0.626455072147511
ENSMUSG00000002416	68198	Ndufb2	42.4416580319651	-0.102555920485877	0.274342698885017	-0.373824129100882	0.708535166456105	0.852030301113776
ENSMUSG00000002428	20585	Hltf	121.524317349757	0.0835142240171948	0.138807604158643	0.601654531272987	0.547404122085124	0.749919478063428
ENSMUSG00000002455	68879	Prpf6	589.33185543291	-0.0264383545722666	0.0740959643269342	-0.356812342108302	0.721232296002841	0.859370765251374
ENSMUSG00000002458	56470	Rgs19	93.6378537330065	0.465725621285245	0.196720993015666	2.3674424073701	0.0179115075287668	0.113312154314276
ENSMUSG00000002459	58175	Rgs20	1.37778878710579	1.28196753437793	1.39779706686003	0.91713422840248	0.35907230681681	NA
ENSMUSG00000002475	106861	Abhd3	13.1639792653847	-0.0476629158076445	0.423145889946105	-0.112639439352029	0.91031641592695	NA
ENSMUSG00000002477	20641	Snrpd1	170.300301845704	0.340887186223913	0.22800879541063	1.49506156378747	0.134898375841499	0.345284437745742
ENSMUSG00000002486	77832	Tchp	67.3657136099352	-0.16967418258787	0.193332613666001	-0.877628349249949	0.380145439475715	0.620260276970588
ENSMUSG00000002489	21844	Tiam1	144.570435264278	-0.86028396271415	0.24748544457279	-3.47609922756942	0.000508764008085848	0.0197898816206454
ENSMUSG00000002496	22084	Tsc2	1048.94970615685	-0.262581817469615	0.108424803336337	-2.42178735298305	0.0154443851083024	0.106139204039974
ENSMUSG00000002500	66211	Rpl3l	5962.24935923077	-0.173020368012331	0.145125002203402	-1.19221612668665	0.233176511639149	0.4721072328237
ENSMUSG00000002504	65962	Nherf2	694.747080254872	-0.0287369256796756	0.21107160363131	-0.136147758321256	0.891704473313993	0.950173395332266
ENSMUSG00000002524	67959	Puf60	904.888189493702	0.125786345183463	0.10746098416001	1.17053036659488	0.241787601176282	0.482201819864567
ENSMUSG00000002546	99412	Golga2	886.666980917633	-0.205742506197337	0.116578786200006	-1.76483657879538	0.0775912350761108	0.251497817342608
ENSMUSG00000002550	22245	Uck1	182.630677816952	-0.0128063065893614	0.176537657656729	-0.0725415005463749	0.942170979785	0.973095309822842
ENSMUSG00000002565	20259	Scin	23.7206814824333	-0.248289275060546	0.327657331660515	-0.757771156232809	0.448587992594267	0.676430944529013
ENSMUSG00000002578	22781	Ikzf4	22.4558985534689	-0.650823695467339	0.537902727311867	-1.20992823129897	0.226306433191882	0.464591542028942
ENSMUSG00000002580	103742	Mien1	46.4342405562912	0.299419058318352	0.238554038314205	1.25514143644041	0.209427420599875	0.443809548332265
ENSMUSG00000002588	18979	Pon1	19.8424075684523	-0.25194133884722	0.595107597736303	-0.423354263675285	0.672036808879401	0.829564155040405
ENSMUSG00000002602	26362	Axl	1273.13962855325	0.192353437631107	0.107089548555731	1.79619244104857	0.0724639164889605	0.242891600774263
ENSMUSG00000002603	21803	Tgfb1	464.390600533844	0.484586306683838	0.165421735951285	2.92939923461173	0.00339617907249515	0.0477972797312556
ENSMUSG00000002608	52132	Ccdc97	646.703535569909	-0.0077541973352017	0.100452261680338	-0.0771928596279629	0.938470121890611	0.971460768372488
ENSMUSG00000002617	22700	Zfp40	26.5749003397562	0.157977313459811	0.292831992200794	0.539481059676998	0.58955496249405	0.7772172165883
ENSMUSG00000002625	54194	Akap8l	406.690111779653	-0.0811545570270712	0.115128038844552	-0.704906970027065	0.480868132300484	0.702171677919784
ENSMUSG00000002633	20423	Shh	0	NA	NA	NA	NA	NA
ENSMUSG00000002635	68079	Pdcd2l	165.733630123441	0.0422950624685023	0.131899236495814	0.320661920358004	0.748466607684837	0.874894119478807
ENSMUSG00000002658	98053	Gtf2f1	362.717988429937	0.0303059159778754	0.13342218762344	0.22714300010886	0.820312548515264	0.91502047106941
ENSMUSG00000002660	53895	Clpp	415.357721886543	0.14023052402487	0.142193647093328	0.986194017042338	0.324037914661655	0.568291788575334
ENSMUSG00000002661	66400	Alkbh7	279.640730401529	0.172114704812344	0.184199923499092	0.934390750782223	0.350102367052274	0.592892069062916
ENSMUSG00000002664	19197	Pspn	1.00636237307695	1.49416778962241	1.37009025799583	1.09056157497834	0.275465845133641	NA
ENSMUSG00000002668	70785	Dennd1c	51.7079121018767	0.261027271032765	0.271187008078804	0.962536048028206	0.335780404491231	0.580458947489246
ENSMUSG00000002679	69792	Med6	120.769977664032	0.0699646385438464	0.150582146326477	0.464627714843142	0.642198081491947	0.810010529461716
ENSMUSG00000002688	18760	Prkd1	41.0222764198453	0.0914787722290163	0.277992263199611	0.329069489834437	0.742103164717467	0.87058299689268
ENSMUSG00000002699	16822	Lcp2	84.9432891835707	0.414766408522096	0.248786354966873	1.66715899100384	0.0954827946917413	0.283369639463765
ENSMUSG00000002718	110750	Cse1l	807.993556400198	-0.217243940246746	0.0946943988133516	-2.29415829203316	0.0217814080515329	0.125532417375184
ENSMUSG00000002728	67877	Naa20	456.031299958413	0.0889833601645117	0.115751946254843	0.768741805590057	0.442046601864979	0.671959184468787
ENSMUSG00000002731	23992	Prkra	94.4224780581709	0.365644139903312	0.198969277961948	1.83769144487341	0.0661078852215218	0.232597944257791
ENSMUSG00000002732	14231	Fkbp7	148.303669093915	0.303921211864732	0.200771047731144	1.51377011426328	0.13008415493961	0.339052294947656
ENSMUSG00000002733	83435	Plekha3	191.581574654441	-0.454648104112644	0.190984817572938	-2.38054579358913	0.0172870122413068	0.111615244063218
ENSMUSG00000002741	56418	Ykt6	900.877655588126	0.0010474579599034	0.0753941488441779	0.0138930935087317	0.988915271780839	0.995255906773776
ENSMUSG00000002748	22385	Baz1b	825.723508221387	-0.0850934619805057	0.122985509485003	-0.691898275958131	0.4890012134107	0.707565099828888
ENSMUSG00000002763	224824	Pex6	462.552203814862	0.277562918190814	0.117176635515261	2.36875650995001	0.0178479992216073	0.113124943284886
ENSMUSG00000002767	27398	Mrpl2	936.246078093651	0.118062622807326	0.133961374715843	0.881318387914121	0.378145516331546	0.618513850544991
ENSMUSG00000002768	17256	Mea1	227.324027730647	0.0525131890980812	0.122496643740044	0.428690839967192	0.668148227635629	0.82671182909344
ENSMUSG00000002769	14711	Gnmt	18.5394819189364	-0.691245633960294	0.429639458917981	-1.60889699400784	0.107638866903864	0.302467936442997
ENSMUSG00000002771	14814	Grin2d	16.5876459966177	0.198116907066753	0.326477613244416	0.606831522375882	0.54396272630212	0.747504011443178
ENSMUSG00000002778	68137	Kdelr1	666.963724354067	0.101749305155135	0.100600784257475	1.01141661972257	0.311817069959798	0.555961960096703
ENSMUSG00000002781	70209	Tmem143	755.757280972186	-0.226596305767463	0.162408011857595	-1.39522861696103	0.162946910036486	0.384921684438172
ENSMUSG00000002791	NA	Pdxk-ps	0.863603805767995	-0.150945107731169	1.45523817669285	-0.103725362726674	0.917387298671152	NA
ENSMUSG00000002797	110175	Ggct	124.101362517589	0.0264456790539864	0.225664604959243	0.117190194974363	0.906709336657371	0.957899752132603
ENSMUSG00000002799	16450	Jag2	564.486935198931	-0.268889181919227	0.158140580990546	-1.70031740262356	0.0890712387747497	0.271880225974081
ENSMUSG00000002803	399566	Btbd6	202.612956315457	-0.221944192896922	0.120799320605598	-1.83729669822858	0.0661661070640156	0.232628009336558
ENSMUSG00000002804	66174	Nudt14	105.689769901614	0.537414394220218	0.232887988061492	2.307608901144	0.0210208989912268	0.123714527719871
ENSMUSG00000002808	105298	Epdr1	1566.27069254089	-0.191559176460715	0.13764521411789	-1.39168788169161	0.164016933526778	0.386559605566909
ENSMUSG00000002812	14248	Flii	1391.79502002725	-0.30251164883926	0.125131206980438	-2.41755558936272	0.0156251471306082	0.106776186296295
ENSMUSG00000002814	21975	Top3a	76.1623772596906	0.222923284138235	0.166993643135385	1.33492077873591	0.181902276273566	0.408713400141784
ENSMUSG00000002820	235040	Atg4d	572.298988587201	-0.012642666172937	0.115302614945922	-0.109647696878917	0.912688782040451	0.960588526767959
ENSMUSG00000002825	60507	Qtrt1	78.7755648128655	0.315808003773944	0.167020226183791	1.89083688239307	0.0586461220879812	0.216842451153213
ENSMUSG00000002831	57435	Plin4	2188.14000841624	-0.916830527185631	0.304721526969141	-3.00874879535005	0.00262325917840641	0.0416556375000178
ENSMUSG00000002833	15193	Hdgfl2	465.194749133891	0.0797201931783325	0.0868155657037356	0.91827073327361	0.358477145406519	0.599421567675068
ENSMUSG00000002835	27221	Chaf1a	36.7384659053009	0.230933407665988	0.485388606963809	0.475770144483853	0.634238141886433	0.804602575739164
ENSMUSG00000002844	11544	Adprh	624.816896712001	0.229975357067737	0.0895691256449897	2.56757398726044	0.0102412931493497	0.0859366875463046
ENSMUSG00000002845	67846	Tmem39a	147.514676784067	-0.196737353397242	0.185157731206106	-1.06253923136618	0.287990957775963	0.533366929295793
ENSMUSG00000002846	76916	Timmdc1	429.111013412622	0.0734710175757537	0.141722285958985	0.518415414192629	0.604168462353575	0.787727511455232
ENSMUSG00000002847	85031	Pla1a	125.781964289724	0.10269316164764	0.179028774179201	0.573612605674483	0.566229979600877	0.762170606173462
ENSMUSG00000002870	17216	Mcm2	171.859969500401	0.227039444893014	0.295121480825156	0.769308436167421	0.441710230307116	0.671677443897599
ENSMUSG00000002871	24100	Tpra1	394.431806885985	0.27861712514346	0.128994337140105	2.15991749188838	0.0307790573962528	0.151274134300236
ENSMUSG00000002881	17936	Nab1	272.471854668772	-0.259295363058003	0.169842600566324	-1.52668036283834	0.126840512774162	0.334249678339497
ENSMUSG00000002885	26364	Adgre5	351.408517336187	0.171831965487185	0.11251673435472	1.52716808279795	0.126719220726165	0.33409939778607
ENSMUSG00000002897	16172	Il17ra	125.71630618364	-0.196454597864506	0.323593090290608	-0.607103809565518	0.54378202215906	0.747490185415844
ENSMUSG00000002900	16777	Lamb1	1050.78699456681	0.225830911278782	0.145400244560316	1.55316734137336	0.12038316137583	0.324147757633971
ENSMUSG00000002908	84036	Kcnn1	235.581199208082	-0.342282099023158	0.178268079940332	-1.92004142938951	0.0548526665402333	0.209038639525791
ENSMUSG00000002910	70807	Arrdc2	444.389621515096	-2.04059928530134	0.698271882640356	-2.92235637154009	0.00347393803882385	0.0481453543471455
ENSMUSG00000002930	19051	Ppp1r17	0	NA	NA	NA	NA	NA
ENSMUSG00000002944	12491	Cd36	3968.74212314841	-0.097530179389647	0.161224793998449	-0.604932882659384	0.545223593355248	0.748394793382346
ENSMUSG00000002948	26400	Map2k7	666.513361183037	-0.156351482108999	0.0948850112741162	-1.64779958403874	0.0993938044338994	0.289295703528639
ENSMUSG00000002949	21856	Timm44	916.756763276876	0.0499496129980777	0.110741593786633	0.451046542587386	0.65195600473586	0.815690443086624
ENSMUSG00000002957	11772	Ap2a2	1175.43234511098	0.0729664456149487	0.120494328675589	0.605559169605391	0.544807522360062	0.74807614439804
ENSMUSG00000002963	59047	Pnkp	339.869295399262	0.284168608636017	0.123120705004902	2.30804890716556	0.0209964164571376	0.123679553364737
ENSMUSG00000002968	75613	Med25	922.632931896551	-0.108231096332391	0.086600158741707	-1.24977942194309	0.211380135203196	0.445816276301144
ENSMUSG00000002980	57278	Bcam	1022.01566175188	0.0128938407463068	0.12382348985785	0.104130813637292	0.917065538028233	0.962376608466231
ENSMUSG00000002981	56457	Clptm1	1054.30244326006	0.00394673129649168	0.0693128206787819	0.0569408553546264	0.954592309222661	0.978651497590959
ENSMUSG00000002983	19698	Relb	195.112278284329	-0.0986386639851193	0.153642564154729	-0.642000896872453	0.520872600668258	0.731763597954853
ENSMUSG00000002984	53333	Tomm40	432.745724829694	0.425607812895706	0.171973435633737	2.47484625359321	0.0133293543230582	0.0981454498947647
ENSMUSG00000002985	11816	Apoe	11776.0638241071	0.942767396006256	0.372387784098311	2.53168185494872	0.0113516935950387	0.0907896310254866
ENSMUSG00000002992	11813	Apoc2	0.136909032748469	-0.270704476511791	4.32804458550702	-0.0625466007023766	0.950127552564795	NA
ENSMUSG00000002996	73389	Hbp1	284.100040028925	-0.411225834090514	0.134924136677407	-3.0478300192776	0.00230500270591858	0.039528722496614
ENSMUSG00000002997	19088	Prkar2b	115.600699589689	0.454012550691069	0.524395088265197	0.865783377554188	0.386608966420337	0.625987479366521
ENSMUSG00000003031	12576	Cdkn1b	676.753238752099	-0.134736515179312	0.114946230704733	-1.17216992982931	0.241128838548453	0.481535842525589
ENSMUSG00000003032	16600	Klf4	604.305158376085	-0.885651806531856	0.421396362043157	-2.10170729105904	0.0355789245076636	0.165303636341669
ENSMUSG00000003033	11767	Ap1m1	347.866405379365	-0.143922774054976	0.116588727879664	-1.2344484468818	0.21703584572239	0.453018187363599
ENSMUSG00000003037	17274	Rab8a	292.02413621285	0.305229524820236	0.12953248981888	2.35639356000201	0.0184533552726965	0.115048909368372
ENSMUSG00000003038	15331	Hmgn2	570.332550907173	0.526377908976812	0.202400683476632	2.60067258635312	0.00930412057587916	0.081224582579641
ENSMUSG00000003039	67922	Fam32a	278.682311762183	0.249470522356559	0.0982850434679701	2.5382348478877	0.0111413192381466	0.0897087998040751
ENSMUSG00000003051	13710	Elf3	5.57854844713478	-0.594155606399771	0.624202963353312	-0.951862841547367	0.341166546686873	NA
ENSMUSG00000003053	13095	Cyp2c29	0.924378941298444	-4.29180059637638	4.22748713242827	-1.01521316610399	0.310004225867345	NA
ENSMUSG00000003062	76205	Stard3nl	115.01835166305	0.161419647067298	0.176268312419593	0.915761005773126	0.359792259907504	0.600794534629026
ENSMUSG00000003068	20869	Stk11	1623.49735449696	-0.172194325738639	0.10352701272413	-1.66327918876099	0.0962565625575911	0.284064379040783
ENSMUSG00000003070	13637	Efna2	21.643239050548	0.280493907017907	0.346715627130739	0.809002782306491	0.418513545883124	0.654293232487788
ENSMUSG00000003072	66043	Atp5d	4886.51425792281	0.0530691119794911	0.137206964117708	0.386781475129527	0.698917992623075	0.8457250006872
ENSMUSG00000003099	19060	Ppp5c	884.37234981246	-0.089929672260831	0.0761978640223886	-1.18021250877069	0.237915705193251	0.477938152628849
ENSMUSG00000003119	69131	Cdk12	133.092902546612	-0.366913177935646	0.211322257880332	-1.73627322372934	0.0825155353884633	0.259958033802332
ENSMUSG00000003123	16890	Lipe	450.812480840991	-0.00185261715971777	0.251832883037418	-0.00735653397353396	0.994130388064066	0.997569768167175
ENSMUSG00000003131	18475	Pafah1b2	373.088288906723	0.0914826285824354	0.115807376957525	0.789955104638874	0.429553988022498	0.661262860382134
ENSMUSG00000003134	54610	Tbc1d8	190.876987241469	-0.231755922261705	0.164502362482104	-1.40883035820788	0.158885336103365	0.379628967459007
ENSMUSG00000003135	52846	Cnot11	413.752937495911	0.00182615234243104	0.107551699030512	0.0169792979459392	0.986453131238065	0.993789172911707
ENSMUSG00000003153	20527	Slc2a3	68.2931603442236	-0.383899976553645	0.260762498999347	-1.47222080639213	0.140961260598153	0.353981769038314
ENSMUSG00000003154	60611	Foxj2	475.685084383547	-0.327159018724378	0.12839898036706	-2.54798766928768	0.0108346300631276	0.0887933871635431
ENSMUSG00000003161	109552	Sri	335.106464872305	0.215802277069762	0.107634042812006	2.00496303429468	0.0449669990443235	0.1859272388668
ENSMUSG00000003166	13356	Dgcr2	271.895018931283	0.145505326926558	0.111657704244688	1.30313736889751	0.192527867804276	0.422137520500352
ENSMUSG00000003184	54131	Irf3	317.100925676321	0.359261961003737	0.124552670794751	2.88441796319053	0.00392137914030649	0.0516340623172885
ENSMUSG00000003190	75736	Bcl2l12	49.8466149211322	0.244977227539026	0.198880956380622	1.23177820540134	0.218031946817832	0.454528474131799
ENSMUSG00000003198	224893	Zfp959	44.7984626462599	0.307376355504137	0.240715208735469	1.27692951815905	0.201627131739729	0.433958572620013
ENSMUSG00000003199	68047	Mpnd	671.837252086029	0.0357494751096539	0.127836824179491	0.279649274292509	0.779746599272064	0.892304582510325
ENSMUSG00000003200	20405	Sh3gl1	332.516944241912	0.299779268597498	0.125396062573002	2.39065934325469	0.0168181494417484	0.110264250541429
ENSMUSG00000003206	50498	Ebi3	10.579664581216	0.656543095449159	0.42493538827376	1.54504217244949	0.122336062928447	NA
ENSMUSG00000003208	72886	Yju2	83.5579190503021	0.543082031545871	0.185279093864775	2.93115656071935	0.00337702540865571	0.0477291027566573
ENSMUSG00000003226	19386	Ranbp2	741.505630484967	-0.218234606856848	0.117709763306936	-1.85400599513388	0.0637383022987739	0.227365404044687
ENSMUSG00000003227	13608	Edar	2.36693653859961	0.620575307903176	0.937705194317076	0.661802143855177	0.508098032001421	NA
ENSMUSG00000003228	14773	Grk5	125.479700916316	-0.27785165641225	0.208341790395812	-1.33363381338128	0.182323895684623	0.409270107534464
ENSMUSG00000003233	13544	Dvl3	463.211940929572	-0.353027253935884	0.11761266780344	-3.00160909984528	0.00268556786573508	0.0422186769695241
ENSMUSG00000003234	27406	Abcf3	667.787233687291	-0.0529228371543558	0.0903904559920181	-0.585491427978073	0.55821732875062	0.75765367245074
ENSMUSG00000003235	224045	Eif2b5	710.486011657048	0.0104397645344468	0.0764867717647934	0.13649111203896	0.891433050362441	0.95011181961461
ENSMUSG00000003269	19158	Cyth2	286.764880447602	0.127111889434154	0.139271718120737	0.912689892458702	0.361405661331166	0.602357818048771
ENSMUSG00000003271	54200	Sult2b1	0.513679907290452	-2.45005134237086	1.99941963302234	-1.22538125659362	0.220431605631067	NA
ENSMUSG00000003271	545963	Sult2b1	0.513679907290452	-2.45005134237086	1.99941963302234	-1.22538125659362	0.220431605631067	NA
ENSMUSG00000003273	12348	Car11	65.4902715888981	-0.422893818717837	0.223482207309093	-1.89229300985444	0.0584519517762449	0.216512110212437
ENSMUSG00000003279	224997	Dlgap1	3.34706227303357	-0.00167932861761433	0.81867531371628	-0.00205127550504878	0.998363320092353	NA
ENSMUSG00000003282	56711	Plag1	2.18916007395385	-0.313374357784601	1.13552770224944	-0.275972446258967	0.782569229410756	NA
ENSMUSG00000003283	15162	Hck	75.1166231287478	0.598997186848958	0.237428527140791	2.52285264143412	0.0116407169486457	0.0916584913022492
ENSMUSG00000003299	66163	Mrpl4	630.545485613937	0.0426687114662907	0.129194362672643	0.330267595145819	0.741197775794157	0.869955918278356
ENSMUSG00000003308	50868	Keap1	905.790586163037	-0.188721374787702	0.104288115023014	-1.8096153597757	0.0703554563193255	0.239459820972562
ENSMUSG00000003309	11768	Ap1m2	0.200919547392352	-1.65983269370544	4.0529875754751	-0.409533131497664	0.682148457923008	NA
ENSMUSG00000003316	20340	Glg1	1245.05581527169	0.201945480623026	0.115211922304487	1.75281756074961	0.0796333278460202	0.254666313547843
ENSMUSG00000003341	67331	Atp8b3	0	NA	NA	NA	NA	NA
ENSMUSG00000003344	208198	Btbd2	473.54038790409	-0.000707629561028964	0.104375508989629	-0.00677965135575316	0.994590662294488	0.997664652457441
ENSMUSG00000003345	103236	Csnk1g2	1579.45180956297	0.0441237587401311	0.0740673501621249	0.595724818608324	0.551359075416655	0.752863860833999
ENSMUSG00000003346	216169	Abhd17a	867.010518323145	0.0915267531702188	0.12639223774859	0.724148530009229	0.468974553401847	0.69267929521232
ENSMUSG00000003348	208228	Mob3a	31.3432315831903	0.0268780216211268	0.332922897009517	0.0807334727126278	0.935653916317674	0.970344443186861
ENSMUSG00000003352	12297	Cacnb3	80.8635054947714	0.258981616229118	0.218898329170497	1.18311371864058	0.236764081589867	0.476672155812888
ENSMUSG00000003354	105833	Ccdc65	1.53854148041781	-0.233259914943018	1.11435927626841	-0.209322002257765	0.834196876891412	NA
ENSMUSG00000003355	66120	Fkbp11	24.598671448622	0.570855566811904	0.344059234362748	1.65917815828783	0.0970798974904075	0.285232325989213
ENSMUSG00000003360	74351	Ddx23	1090.8335443137	-0.168491786294439	0.107127734540091	-1.57281199885155	0.115762356472275	0.316496180338748
ENSMUSG00000003363	18807	Pld3	728.810741827087	0.793535072157048	0.238489015959336	3.32734431799723	0.000876779649065719	0.0250167853505483
ENSMUSG00000003378	14809	Grik5	95.0162675522968	0.43756324113982	0.154403564492213	2.83389339215602	0.00459846698513144	0.055573139959804
ENSMUSG00000003379	12518	Cd79a	4.62063686337117	0.469494510809995	0.702837455486809	0.667998706023439	0.504134418472464	NA
ENSMUSG00000003380	14470	Rabac1	1946.14986842269	0.0513585355247325	0.105788787745837	0.485481841876515	0.627334590116904	0.800793469637048
ENSMUSG00000003382	27049	Etv3	219.091182342454	-0.122923739921091	0.127014461385772	-0.967793262121095	0.333147629527788	0.577918151851839
ENSMUSG00000003402	19089	Prkcsh	486.861499395746	0.350624118540366	0.137010256659847	2.55910854477746	0.0104940969315907	0.0872350412842887
ENSMUSG00000003410	15571	Elavl3	1.17160952921802	0.2931623602651	1.58372404648063	0.185109496137644	0.853143153484629	NA
ENSMUSG00000003411	69908	Rab3b	2.14989547358761	-0.740420029500375	0.974006932280803	-0.760179424767086	0.447147341964324	NA
ENSMUSG00000003418	241230	St8sia6	20.835122406176	-0.605237594631738	0.310912194741564	-1.94665119242049	0.0515765667766079	0.201503529702343
ENSMUSG00000003420	14132	Fcgrt	1064.92465067804	0.475680585401911	0.148832546311473	3.1960790646316	0.00139308931853594	0.029978383367591
ENSMUSG00000003421	66394	Nosip	332.617917811095	0.332500730240356	0.13168005163589	2.52506530875122	0.011567678990071	0.0914199780290353
ENSMUSG00000003423	68845	Pih1d1	295.770454858072	0.199365645083109	0.122941520534308	1.62162989538978	0.104882617558858	0.29811331134859
ENSMUSG00000003429	27207	Rps11	743.197727372331	0.40132089661394	0.171948802907874	2.33395574628663	0.0195980392637721	0.118585024117757
ENSMUSG00000003435	20924	Supt5	828.094222963706	-0.309924994737297	0.11224782112178	-2.761078047128	0.00576109071467461	0.063081464211632
ENSMUSG00000003436	13389	Dll3	0.0493838546533454	-0.992045240762961	4.32804458550702	-0.229213267369043	0.818703161198695	NA
ENSMUSG00000003437	54624	Paf1	453.05709663857	0.114070959302566	0.109637582106425	1.04043665603495	0.29813707894678	0.542814534294206
ENSMUSG00000003438	66525	Timm50	645.399007095422	0.228386152333524	0.105106132386633	2.17290986879249	0.0297871015672485	0.149013689205186
ENSMUSG00000003444	67224	Med29	109.232175696897	0.136360997516379	0.174343328694123	0.782140610356351	0.434131942641173	0.665343206371031
ENSMUSG00000003452	12121	Bicd1	16.6877474414056	0.216730324711551	0.406506654929865	0.533153202003406	0.593927533491769	0.779884470907026
ENSMUSG00000003458	59287	Ncstn	579.416099937893	0.23110712964994	0.0782998374938406	2.95156589141223	0.00316167080858127	0.0462202461216283
ENSMUSG00000003464	19298	Pex19	1267.29478096629	-0.00870700600096185	0.0942219813159503	-0.0924094980741812	0.926372693348381	0.966051623780999
ENSMUSG00000003469	105653	Phyhip	8.4154040081051	0.462022986209262	0.626225905619825	0.737789641187011	0.460642289064602	NA
ENSMUSG00000003476	12922	Crhr2	438.11199516021	-0.181309060228663	0.198090642233105	-0.915283317701127	0.360042914579219	0.601137850871724
ENSMUSG00000003477	21743	Inmt	112.576322518425	-0.528226325622493	0.304128822477786	-1.7368505928473	0.0824135461986108	0.259820778209325
ENSMUSG00000003484	72054	Cyp4f18	39.7803675518571	0.60888940441234	0.322889362035392	1.88575244651634	0.0593283217705389	0.21800012918274
ENSMUSG00000003500	23917	Impdh1	299.379736036705	-0.0880089989798067	0.120366452375219	-0.731175483227301	0.464671973172316	0.689233292503062
ENSMUSG00000003505	26438	Psg18	0	NA	NA	NA	NA	NA
ENSMUSG00000003518	72349	Dusp3	1406.31258779385	-0.262201483899717	0.113109116489205	-2.31812865344714	0.0204423300843995	0.121815466929458
ENSMUSG00000003526	19125	Prodh	74.8439155833098	-0.128473652187946	0.209381152996746	-0.613587471217824	0.539487964752095	0.74404056499095
ENSMUSG00000003527	27886	Ess2	143.944845145999	0.148543376987852	0.134114566136278	1.10758571024203	0.268040777591563	0.511616602950878
ENSMUSG00000003528	13358	Slc25a1	305.043087131152	0.336743137138009	0.431494924967095	0.780410423514689	0.435149334433138	0.66644949413565
ENSMUSG00000003531	13353	Dgcr6	369.031487201769	0.196606075988089	0.133993600904127	1.46727959142438	0.142300013151261	0.355492931631515
ENSMUSG00000003534	12305	Ddr1	300.614464496348	0.0583526975241573	0.119326416253517	0.489017430978427	0.624829356275917	0.799598959993379
ENSMUSG00000003541	15937	Ier3	106.471936188363	-0.866799472717372	0.354369859207307	-2.4460304684386	0.0144438793742128	0.102396513608261
ENSMUSG00000003545	14282	Fosb	182.257078958471	-1.43656724523367	0.876228450798891	-1.63948938649949	0.101111379286423	0.29156794768554
ENSMUSG00000003546	74764	Klc4	294.763742566607	0.301987782151847	0.113481696023568	2.66111445927922	0.00778824768496807	0.0736859915005261
ENSMUSG00000003549	13870	Ercc1	211.639550636138	-0.129678526554577	0.178431776566003	-0.726768118606995	0.467368016445703	0.691771031220165
ENSMUSG00000003555	13074	Cyp17a1	0.351110621620618	0.4966072949355	2.67178846304753	0.185870738572264	0.852546129544626	NA
ENSMUSG00000003559	57344	As3mt	385.895194670937	-0.0426437632876601	0.154622808923423	-0.275792191233439	0.782707681698833	0.89413262747315
ENSMUSG00000003573	26558	Homer3	63.0243569163278	0.0523757112896262	0.221237194504062	0.236740080740196	0.812858438736945	0.911281177180768
ENSMUSG00000003575	382056	Crtc1	210.714774594182	-0.145514022892762	0.125095476242101	-1.16322370132029	0.244738752662274	0.485763825947643
ENSMUSG00000003581	71673	Rnf215	119.015032814275	0.236050776132461	0.133695543349804	1.76558447812171	0.0774655859925698	0.251309555905804
ENSMUSG00000003585	67815	Sec14l2	12.3576728744597	0.864153710777905	0.421992167669829	2.04779561561443	0.0405800301432834	NA
ENSMUSG00000003604	74268	Aven	250.849516488339	0.168217909867551	0.139895646665924	1.20245278446199	0.229188148848554	0.467557841274832
ENSMUSG00000003617	12870	Cp	192.212354295919	-0.127888947281481	0.178892149264796	-0.714894129267685	0.474674464903168	0.697632376155327
ENSMUSG00000003623	74114	Crot	459.830008863182	-0.12210543035928	0.110010751785053	-1.10994087739587	0.267024504216683	0.510662403270588
ENSMUSG00000003644	20111	Rps6ka1	177.860910780407	0.314403657510816	0.167354352759949	1.87867033229661	0.0602895211562152	0.220599158832116
ENSMUSG00000003657	12308	Calb2	0.062701201125813	-0.992045240762961	4.32804458550702	-0.229213267369043	0.818703161198695	NA
ENSMUSG00000003660	320632	Snrnp200	838.988484958092	-0.294578041907149	0.135783181096971	-2.16947371189348	0.0300467380539523	0.149469526228918
ENSMUSG00000003662	26371	Ciao1	447.114620263219	0.0197560720239268	0.103675791416084	0.190556269251319	0.84887325435892	0.928942499971843
ENSMUSG00000003665	15116	Has1	45.8110604733177	-2.31777482590896	0.981315056053763	-2.36190692439756	0.0181812062452829	0.11407073963475
ENSMUSG00000003680	225895	Taf6l	166.156676416411	0.348853908045026	0.148981667884854	2.34158949216927	0.0192018218739956	0.117571503154108
ENSMUSG00000003680	100039957	Taf6l	166.156676416411	0.348853908045026	0.148981667884854	2.34158949216927	0.0192018218739956	0.117571503154108
ENSMUSG00000003721	72999	Insig2	734.716974008135	-0.257608376840341	0.126253747034561	-2.04040183274578	0.0413103195207895	0.177108702778398
ENSMUSG00000003731	16650	Kpna6	1101.74587428163	-0.419003022871973	0.143844485040417	-2.91288903258434	0.00358101830848684	0.0490533329279583
ENSMUSG00000003746	17155	Man1a	453.668640331593	0.0331582868123493	0.148533275624638	0.223238103872053	0.823350197521265	0.916169189649666
ENSMUSG00000003752	233011	Itpkc	51.5756175261187	-0.911643669031634	0.389497034578584	-2.34056639229099	0.0192545146448604	0.117571503154108
ENSMUSG00000003762	76889	Coq8b	60.9184550080626	-0.132336593047462	0.257536758936088	-0.51385516224619	0.607353257813728	0.789452645449257
ENSMUSG00000003778	78656	Brd8	242.041488455083	0.0834515323786528	0.129066875930535	0.646575907079109	0.517906455180091	0.729488200954121
ENSMUSG00000003779	19348	Kif20a	25.1695506803787	0.842320477039452	0.424777254481903	1.98296982277646	0.0473708004450764	0.192162122085196
ENSMUSG00000003808	66590	Farsa	362.93581561023	0.116583445196971	0.103415145378532	1.1273343451797	0.259601146450681	0.501930482573534
ENSMUSG00000003809	270076	Gcdh	374.190792147562	-0.139482874708834	0.121712013845785	-1.14600745071531	0.25179206920382	0.494314253689378
ENSMUSG00000003810	17776	Mast2	1416.54933328772	-0.258002368257209	0.135922592751044	-1.8981566127845	0.0576754543361919	0.214820134189869
ENSMUSG00000003812	13423	Dnase2a	165.507880709877	0.676211004997345	0.20875640499008	3.23923476757266	0.00119850878484912	0.0279066391055094
ENSMUSG00000003812	100503676	Dnase2a	165.507880709877	0.676211004997345	0.20875640499008	3.23923476757266	0.00119850878484912	0.0279066391055094
ENSMUSG00000003813	19358	Rad23a	1122.65935201239	-0.215457074604741	0.111540799888342	-1.93164362117202	0.0534035078830592	0.206106335601902
ENSMUSG00000003814	12317	Calr	3517.65960643484	0.312809432427412	0.155578974444375	2.01061508179084	0.0443661297812794	0.184475470711753
ENSMUSG00000003824	71846	Syce2	16.7791761243296	0.95049610451081	0.485657035578426	1.95713442795851	0.0503316656523214	0.199083032027281
ENSMUSG00000003847	54446	Nfat5	417.162726574891	-0.329864027020315	0.145535057011653	-2.26656060603942	0.0234170808954254	0.13094329141105
ENSMUSG00000003848	67619	Nob1	313.228347244674	-0.0824503609649412	0.118971811618588	-0.693024337809268	0.488294278196967	0.707147914941494
ENSMUSG00000003849	18104	Nqo1	194.3072639135	-1.11327393547896	0.318148941250582	-3.49922250598382	0.000466617017125912	0.0191324624178783
ENSMUSG00000003863	76787	Ppfia3	11.4987367579226	0.0821723778572876	0.455634926760349	0.180346968660961	0.856880184463362	NA
ENSMUSG00000003865	14936	Gys1	5134.67431425979	-0.185454379434505	0.137569439899299	-1.34807832008517	0.177633193591632	0.403195316246947
ENSMUSG00000003868	20174	Ruvbl2	361.53134613856	0.201799061374465	0.156261236264727	1.29142112399899	0.196557689631756	0.427275113740424
ENSMUSG00000003872	22342	Lin7b	1.58157689336612	0.673400524641575	1.05759082470904	0.636730679681191	0.524300286099482	NA
ENSMUSG00000003873	12028	Bax	134.923736841231	0.111874724949059	0.165123919128272	0.67751980173237	0.498076210691726	0.713973473025373
ENSMUSG00000003882	16197	Il7r	68.1776404498064	0.398905408056615	0.703082749096891	0.567366229037775	0.570465389113362	0.764785894448399
ENSMUSG00000003923	21780	Tfam	514.296290451801	0.0528463600486991	0.113741313814598	0.464618864301502	0.642204420675013	0.810010529461716
ENSMUSG00000003929	224694	Zfp81	56.7291616286176	0.131291609713488	0.183306714432885	0.716240046741758	0.473843139184332	0.696949944246996
ENSMUSG00000003934	13643	Efnb3	14.885774583044	-0.628698495897238	0.523989169429149	-1.19983108922302	0.23020494732676	0.468772040176072
ENSMUSG00000003948	67468	Mmd	215.606376917195	0.149274678114306	0.217878534685452	0.685127969718591	0.493263171940415	0.710815509097359
ENSMUSG00000003949	217082	Hlf	75.5236858927448	-1.01708164075475	0.273712459185137	-3.71587630238931	0.00020250063936991	0.0135767011581575
ENSMUSG00000003955	70186	Fam162a	690.03907997931	0.0611232778502682	0.133991085942629	0.456174210547405	0.648264708951413	0.813960826917913
ENSMUSG00000003970	26961	Rpl8	4592.0514068875	0.288208449632756	0.130592110042232	2.20693615823767	0.027318519847995	0.14232084803278
ENSMUSG00000003974	108069	Grm3	0	NA	NA	NA	NA	NA
ENSMUSG00000003992	66970	Ssbp2	145.352147288428	-0.0120574743291859	0.140498358375076	-0.0858193253546574	0.931610043742374	0.968300530646747
ENSMUSG00000004018	67030	Fancl	33.3545225407788	0.017167220500875	0.256813866459994	0.0668469375797874	0.946703556163383	0.975081860578221
ENSMUSG00000004031	240843	Brinp2	3.4485230406037	0.90356534797735	1.04168390310543	0.867408381068071	0.38571829136168	NA
ENSMUSG00000004032	14866	Gstm5	376.906280728545	-0.0870290014955917	0.139530852762043	-0.623725862580456	0.532807635264421	0.740400560138932
ENSMUSG00000004035	68312	Gstm7	31.8125497108241	-0.273048795199759	0.322412047195333	-0.846893897343522	0.397054264325801	0.635756142160551
ENSMUSG00000004038	14864	Gstm3	0.774794393861606	-0.222416204549652	1.68360878247803	-0.132106821290328	0.894899800594211	NA
ENSMUSG00000004040	20848	Stat3	1125.37360622855	-0.398560858865952	0.251343029963961	-1.58572473214435	0.112801766262439	0.310908147439262
ENSMUSG00000004043	20850	Stat5a	279.024004190642	-0.15583622289958	0.140851140484495	-1.10638950003202	0.268557968238024	0.512204728887168
ENSMUSG00000004044	19285	Cavin1	3319.21148574597	0.210732677589056	0.0820459413286544	2.56847169008539	0.0102148055342539	0.085876455852562
ENSMUSG00000004054	26403	Map3k11	457.654665768175	0.212405836806109	0.0988688370366537	2.14835981864907	0.0316851822285085	0.154061115631472
ENSMUSG00000004056	11652	Akt2	2986.83531959146	-0.188310419249293	0.0963229861731669	-1.95498942392373	0.0505843185933719	0.199614308983368
ENSMUSG00000004069	83945	Dnaja3	1313.87105296351	-0.152931336901386	0.100049267764016	-1.52856028154151	0.126373488735383	0.333546011218098
ENSMUSG00000004070	15369	Hmox2	369.07384838755	0.0667366746675887	0.109876282499896	0.607380165666344	0.543598648213903	0.747379978228716
ENSMUSG00000004071	66626	Cdip1	936.173662254564	-0.246106371850772	0.103503615532366	-2.37775628015442	0.017418334303184	0.111982747471651
ENSMUSG00000004085	65964	Map3k20	2806.09316413137	-0.447794478344803	0.12988980790096	-3.44749511590811	0.000565810637143455	0.0204644686996278
ENSMUSG00000004096	66070	Cwc15	734.574004887321	0.0643405783820158	0.100109901534867	0.642699447263033	0.520419139753146	0.731580672488302
ENSMUSG00000004098	53867	Col5a3	1958.01374829683	0.361178156747204	0.0934098525608209	3.86659594085147	0.000110365057892078	0.0103201624650845
ENSMUSG00000004099	13433	Dnmt1	246.750672926114	0.0950917594757932	0.221971053300682	0.428397117830413	0.668362022693131	0.826899676073049
ENSMUSG00000004100	235036	Ppan	148.015028340933	0.171962593931898	0.233879393472743	0.735261843202698	0.462180041669246	0.687417122641709
ENSMUSG00000004105	26360	Angptl2	1356.16442496519	0.351599264063182	0.195446798882233	1.79895125463293	0.0720263918217385	0.242181481775614
ENSMUSG00000004110	12290	Cacna1e	0.810761801118236	-0.47621194854502	1.5901912301278	-0.29946835293938	0.764582715366419	NA
ENSMUSG00000004113	12287	Cacna1b	2.30163758984915	1.46190807706115	1.09040060379255	1.34070732534121	0.180015495273064	NA
ENSMUSG00000004127	108943	Trmt10a	31.1252011096453	0.0873130495264339	0.288457854899093	0.302689103602249	0.762126802549863	0.882605604076069
ENSMUSG00000004151	14009	Etv1	59.9949807630845	0.46737568991237	0.195178480754115	2.39460666005064	0.0166382034591224	0.109752928558538
ENSMUSG00000004187	16581	Kifc2	55.3297001184326	0.22767034153898	0.244800986563686	0.930022156915415	0.352359612619958	0.595011005135487
ENSMUSG00000004207	19156	Psap	16566.1684235633	0.447813429065775	0.124859990226988	3.58652462051036	0.000335114437486198	0.0166831971079883
ENSMUSG00000004221	16151	Ikbkg	277.362714991744	-0.15354743111069	0.101034881090973	-1.51974673946944	0.128574639675502	0.336757527002464
ENSMUSG00000004231	18504	Pax2	0.0500487832089931	0	4.32804458550702	0	1	NA
ENSMUSG00000004233	70560	Wars2	71.3204875240572	0.019750543172126	0.189996139614704	0.103952339306358	0.91720717129774	0.962376608466231
ENSMUSG00000004263	13498	Atn1	130.629198872611	0.264085275812824	0.147223878377106	1.79376660039062	0.0728504300130671	0.243292448569795
ENSMUSG00000004264	12034	Phb2	1269.53894207091	0.0408447829210743	0.0872049791592211	0.468376729343618	0.639515206351323	0.807764071110419
ENSMUSG00000004266	15170	Ptpn6	176.682643960794	0.901877288175389	0.240646383179553	3.74772841486038	0.000178443313511958	0.0132097722809431
ENSMUSG00000004267	13807	Eno2	34.3863985210441	0.0816776459846919	0.24000697856775	0.340313629512384	0.733620354191198	0.865287840517315
ENSMUSG00000004268	14791	Emg1	610.70961620805	0.130355462679607	0.102534598923852	1.27133147296374	0.203610750168277	0.435955907173767
ENSMUSG00000004270	14792	Lpcat3	286.611400041653	-0.0622516605074846	0.125546145461679	-0.495846848014033	0.620002469086466	0.796872297830517
ENSMUSG00000004285	66144	Atp6v1f	798.923956905531	0.288364973218481	0.140643021815295	2.0503326044657	0.0403319849881406	0.175337029557436
ENSMUSG00000004296	16160	Il12b	2.01428365330385	-0.321505513092236	1.0438250871678	-0.308007076132434	0.758076947953953	NA
ENSMUSG00000004317	12728	Clcn5	129.45109652663	0.582493861915419	0.256408821915329	2.27173877078133	0.0231022929874322	0.129903440461798
ENSMUSG00000004319	12725	Clcn3	507.048149922412	-0.424393899859973	0.135565542602079	-3.13054402847544	0.00174482841951618	0.034234559960566
ENSMUSG00000004328	53417	Hif3a	9.20520024248467	-1.65872544060991	0.686610278713598	-2.41581795675652	0.0156999084530359	NA
ENSMUSG00000004341	75512	Gpx6	0	NA	NA	NA	NA	NA
ENSMUSG00000004344	14780	Gpx5	0	NA	NA	NA	NA	NA
ENSMUSG00000004347	18575	Pde1c	10.0829982019432	0.390001184598246	0.585371248282038	0.666245883689762	0.50525394936218	NA
ENSMUSG00000004356	70683	Utp20	172.069174962842	-0.112300098868758	0.232565882991549	-0.482874346934364	0.629184957463456	0.801545469538569
ENSMUSG00000004359	20728	Spic	5.51088120007878	1.12439143971807	0.826234746637282	1.36086196361781	0.17355731571895	NA
ENSMUSG00000004360	212448	9330159F19Rik	264.289527288859	-0.755857454839277	0.183406496954158	-4.1212141739352	3.76880850315319e-05	0.00785678797641716
ENSMUSG00000004364	26554	Cul3	2762.73873856882	-0.395262555929135	0.121778705677945	-3.24574443231844	0.00117143951101171	0.0278720165549907
ENSMUSG00000004366	20604	Sst	0	NA	NA	NA	NA	NA
ENSMUSG00000004371	16156	Il11	2.34993866221534	0.379012458561072	0.795278836891381	0.476578076744217	0.633662597729401	NA
ENSMUSG00000004383	16795	Large1	366.321184463122	-0.00920173434843497	0.119044500606278	-0.0772965933039471	0.938387600950567	0.971460768372488
ENSMUSG00000004393	52513	Ddx56	334.692972049353	-0.137762365597317	0.134092372394908	-1.02736914215822	0.304246676041639	0.548777792866484
ENSMUSG00000004394	103694	Tmed4	780.341377275846	0.0163081156018668	0.0911448372034148	0.178925280929195	0.857996371791405	0.934099354748341
ENSMUSG00000004415	140709	Col26a1	45.9899803091329	0.708695753329922	0.372021999529061	1.90498345320184	0.0567822220427961	0.212935697420059
ENSMUSG00000004446	12122	Bid	30.5611679558811	0.549256265788172	0.33012090355409	1.6638033516656	0.0961517339810736	0.284064379040783
ENSMUSG00000004451	64143	Ralb	271.887536348548	0.0970473081783914	0.150329469775066	0.645564095473766	0.518561696156584	0.730123485660737
ENSMUSG00000004455	19047	Ppp1cc	1206.06157465726	-0.0460006209232937	0.0922427363500286	-0.498690983631899	0.61799709744135	0.795649645282494
ENSMUSG00000004455	434233	Ppp1cc	1206.06157465726	-0.0460006209232937	0.0922427363500286	-0.498690983631899	0.61799709744135	0.795649645282494
ENSMUSG00000004460	67838	Dnajb11	652.981408649532	0.182637217941024	0.0875076951064961	2.08709894277019	0.03687919162343	0.168970527005427
ENSMUSG00000004462	70573	Tbccd1	114.009742218575	-0.0656229758479146	0.151384709229574	-0.433484835964494	0.664662580193001	0.824814381426788
ENSMUSG00000004473	20256	Clec11a	127.620477557676	0.942885775214313	0.294397329456704	3.20276606093664	0.00136114502502967	0.029722417224134
ENSMUSG00000004500	243834	Zfp324	49.0117874774001	0.207826887847191	0.217081991802777	0.957365860342785	0.338382623727472	0.582767647576084
ENSMUSG00000004508	14389	Gab2	190.263051919152	0.160432692940729	0.138469896544617	1.15861062183314	0.246614937293434	0.488395207066976
ENSMUSG00000004530	23790	Coro1c	323.466798381997	0.220900879179446	0.208578363718257	1.05907858917637	0.289563990006428	0.534795508674663
ENSMUSG00000004535	52440	Tax1bp1	1030.34935821859	-0.175805751531788	0.0975425404535571	-1.80234952579992	0.0714904310810454	0.241291508090895
ENSMUSG00000004540	26437	Psg17	0.663690402296728	-0.464495286010049	2.42077562564427	-0.191878702466044	0.847837220425139	NA
ENSMUSG00000004542	26439	Psg19	0.315464431994222	-1.66271337654381	3.04555982976762	-0.545946712421235	0.585102567241076	NA
ENSMUSG00000004552	13034	Ctse	3.8854563947738	0.421942084385513	0.694017140402462	0.607970696719145	0.543206909079458	NA
ENSMUSG00000004558	29811	Ndrg2	20382.8962194568	-0.366063538079953	0.127289580284989	-2.87583270571222	0.00402963222307923	0.0521727101124914
ENSMUSG00000004561	52535	Mettl17	159.574610916324	0.295483722177686	0.120363618606704	2.45492554642445	0.0140913770266374	0.100934667373435
ENSMUSG00000004562	268739	Arhgef40	346.679447995896	0.186447763313437	0.104363160810283	1.78652852084819	0.074013723540764	0.245095830101979
ENSMUSG00000004565	50767	Pnpla6	174.333234403506	0.0941505038956233	0.122129203482532	0.770909014477359	0.440760863573484	0.670813036862981
ENSMUSG00000004567	94178	Mcoln1	411.7715250273	0.0389119503519769	0.0975059844090494	0.399072432197973	0.689839834487424	0.84078008948367
ENSMUSG00000004568	102098	Arhgef18	198.179831869624	-0.258535272756201	0.140779612388754	-1.83645393228014	0.0662905494112148	0.23274960795906
ENSMUSG00000004591	109333	Pkn2	534.03144279925	-0.479724049757997	0.144594341194822	-3.31772354155706	0.000907542621059073	0.0253845569185957
ENSMUSG00000004609	12489	Cd33	107.728271634258	0.268618076075644	0.182528067101528	1.47165353987028	0.141114459699534	0.354099891162533
ENSMUSG00000004610	110826	Etfb	72.6431610891052	0.0539497260653544	0.219141364218391	0.246186867813734	0.805537580749349	0.907519947724924
ENSMUSG00000004612	72310	Nkg7	7.43845363156454	0.793511443508464	0.732513101940033	1.08327269697549	0.278687400396201	NA
ENSMUSG00000004626	20911	Stxbp2	119.561172788318	0.502857848130056	0.200638589946841	2.50628679290105	0.0122006614189945	0.0938025528432883
ENSMUSG00000004630	18545	Pcp2	0.0500487832089931	0	4.32804458550702	0	1	NA
ENSMUSG00000004631	20392	Sgce	195.400847038585	0.329104252655092	0.147714941722979	2.22796860504665	0.0258826086300826	0.138666751547825
ENSMUSG00000004633	69993	Chn2	19.8284874080606	0.43609421468743	0.309711992713778	1.40806370094441	0.159112208334827	0.379898905440812
ENSMUSG00000004637	80707	Wwox	119.596796810864	-0.0883950038141237	0.178197191649247	-0.496051609994592	0.619857998770401	0.796815244204132
ENSMUSG00000004642	20492	Slbp	108.590804961107	0.249275070664724	0.195477942319	1.27520817800473	0.202235567476936	0.434637071726366
ENSMUSG00000004651	22173	Tyr	0	NA	NA	NA	NA	NA
ENSMUSG00000004654	14602	Ghrhr	0.135065988129803	-1.53223882553953	4.3222229428893	-0.354502496929338	0.722962333102782	NA
ENSMUSG00000004655	11826	Aqp1	4004.26622821908	-0.544666951334001	0.175281091736077	-3.10739136742778	0.00188746340613199	0.0357706488133707
ENSMUSG00000004661	56380	Arid3b	46.9234782672365	-0.382945596141847	0.260318190317857	-1.47106737210434	0.141272897787834	0.354297556820542
ENSMUSG00000004665	12798	Cnn2	368.759387075219	0.428010461805682	0.13129749882773	3.25985236297041	0.0011147022153312	0.0272179328235602
ENSMUSG00000004667	66420	Polr2e	561.16317077449	0.178757440072123	0.10099733807826	1.76992229174999	0.0767400867514828	0.249853515478968
ENSMUSG00000004668	268379	Abca13	0.0650420713777673	0.450636287739379	4.32804458550702	0.10412006596429	0.917074067068648	NA
ENSMUSG00000004677	17925	Myo9b	344.599368408602	0.0893905655211473	0.17451644696166	0.512218573535281	0.608498045476463	0.789994176765231
ENSMUSG00000004698	79221	Hdac9	94.278244880129	-0.624951315325582	0.281474002041106	-2.22028077475629	0.0263997141345651	0.1399182232022
ENSMUSG00000004707	17085	Ly9	82.2291883626401	0.92768835279955	0.33860128291764	2.73976620763482	0.00614829018274304	0.0649489213128722
ENSMUSG00000004709	18106	Cd244a	11.3807853559297	-0.100123993865457	0.49394831704786	-0.202701356416923	0.839368462919403	NA
ENSMUSG00000004730	13733	Adgre1	490.483954985263	0.833517660579423	0.199353417688105	4.18110544702821	2.90095284492652e-05	0.00730216926341316
ENSMUSG00000004748	67900	Mtfp1	668.522207818307	-0.0455242548364046	0.208597657983872	-0.218239529994744	0.827242486813663	0.918389212139447
ENSMUSG00000004768	19335	Rab23	104.706138654494	0.0649496657790348	0.157101789085276	0.413424100114988	0.679295920488052	0.83499897199038
ENSMUSG00000004771	53869	Rab11a	558.249216228495	-0.141249732465714	0.0827707194768744	-1.70651811846554	0.087911655836904	0.269890977929076
ENSMUSG00000004788	217715	Eif2b2	491.147141928255	-0.0237820450199846	0.119596808784739	-0.198851836112029	0.84237864623289	0.92540270877227
ENSMUSG00000004789	78920	Dlst	3896.31164561969	-0.0872762101824137	0.103690224964821	-0.841701425684279	0.399955100040247	0.637996287032158
ENSMUSG00000004791	18654	Pgf	26.9743931607137	-1.2501820341471	0.385829260480795	-3.24024681951081	0.00119426275658989	0.0278835921016084
ENSMUSG00000004798	29869	Ulk2	1349.57783064581	-0.349788682584733	0.120966761272721	-2.89160988443868	0.00383273535897247	0.0510342865862383
ENSMUSG00000004814	56221	Ccl24	41.6324901816651	-0.0468461396547755	0.386574857548628	-0.121182582726251	0.903546419410934	0.956224028538168
ENSMUSG00000004815	110524	Dgkq	52.960341034836	-0.321116229052411	0.272589445145475	-1.1780215073296	0.238788032114569	0.478580430294815
ENSMUSG00000004821	67366	Tmed11	0	NA	NA	NA	NA	NA
ENSMUSG00000004837	71520	Grap	89.8567737655868	0.0382642578434536	0.188953241218135	0.202506491006841	0.839520784444956	0.924013059401469
ENSMUSG00000004842	18736	Pou1f1	0.327365310261788	-0.0745238422806269	2.512700000529	-0.0296588698471514	0.976339114586241	NA
ENSMUSG00000004843	68942	Chmp2b	498.108914628443	-0.0646882723997016	0.0904147537024302	-0.715461467855139	0.47432394226923	0.69742164762538
ENSMUSG00000004846	26433	Plod3	460.517673780647	0.329557979927174	0.136950219305511	2.4064070988597	0.0161103009436302	0.108291830457405
ENSMUSG00000004849	11769	Ap1s1	373.588640007993	0.572498935557324	0.18371621283294	3.11621346167156	0.00183189614296266	0.0350662243033111
ENSMUSG00000004864	26415	Mapk13	1.7176800084363	-0.62086427956759	1.02474725161762	-0.605870646237424	0.544600652957675	NA
ENSMUSG00000004865	20815	Srpk1	312.271187952187	-0.125221472847511	0.153508957960344	-0.815727463148172	0.414656028057926	0.651452419988774
ENSMUSG00000004872	18505	Pax3	11.4327126572531	-0.0425931157744284	0.459064857720885	-0.0927823488512933	0.926076474090165	NA
ENSMUSG00000004880	98386	Lbr	243.909839611405	-0.313958460857819	0.192189896424388	-1.63358463009182	0.102346097272444	0.293719429943849
ENSMUSG00000004885	12904	Crabp2	6.03529366725565	0.99156222383918	0.690798939580776	1.43538469303518	0.151177505439505	NA
ENSMUSG00000004891	18008	Nes	1148.87839592779	0.261344715950395	0.174714837157004	1.4958358442995	0.134696438089479	0.34511886642581
ENSMUSG00000004892	12032	Bcan	2.31039577822484	-0.51255949218513	1.02692805528501	-0.499119183225426	0.617695424055784	NA
ENSMUSG00000004894	73940	Hapln2	1.78967137654494	-2.89668570807212	1.38502520967571	-2.09143175722437	0.0364893778864855	NA
ENSMUSG00000004895	94315	Prcc	687.483166708495	-0.0254736899179518	0.0838362569487331	-0.303850515815959	0.761241778980385	0.882022600365572
ENSMUSG00000004896	229503	Rrnad1	134.754343641925	0.0236722190438443	0.173656535639165	0.136316315171875	0.89157122663394	0.950151465727718
ENSMUSG00000004897	15191	Hdgf	3543.17522735577	-0.0082249423827482	0.0648365866094559	-0.126856498974742	0.899053977186949	0.953435987888743
ENSMUSG00000004902	71803	Slc25a18	2.8038968463994	-0.452514306434482	0.768929448325852	-0.588499123579824	0.556197321949798	NA
ENSMUSG00000004929	50492	Thop1	474.361294848819	0.0448455793946164	0.124127112185506	0.361287543108193	0.717884504897858	0.858014428410572
ENSMUSG00000004931	57267	Apba3	798.400464944482	-0.163620761171239	0.13956201391131	-1.17238750420453	0.241041514080321	0.481505596774912
ENSMUSG00000004933	17179	Matk	47.3174806627113	0.653432748190052	0.343522105724689	1.90215633084683	0.0571507199350393	0.213706059072712
ENSMUSG00000004934	59004	Pias4	336.95922690408	0.152631066075425	0.112150071247456	1.3609538039316	0.173528288764477	0.397529949982083
ENSMUSG00000004936	26395	Map2k1	809.865321115625	-0.172491837984468	0.0689931172076373	-2.50013109953196	0.0124147355006527	0.0947628937386892
ENSMUSG00000004937	52551	Sgta	1261.51587779591	0.0847311230371267	0.0834819520110617	1.01496336628424	0.310123290494313	0.554498116024541
ENSMUSG00000004939	69564	Nmrk2	2028.84219999778	-0.00125672377133582	0.20724476644056	-0.00606395902256117	0.995161690370639	0.997664652457441
ENSMUSG00000004945	70544	Tmem242	879.139408735106	-0.0306093351871656	0.134811727786608	-0.227052465610535	0.820382945676002	0.91502047106941
ENSMUSG00000004947	74198	Dtx2	158.917887928205	0.0973347392691452	0.150553156183804	0.646514106621009	0.517946464371038	0.729488200954121
ENSMUSG00000004948	22788	Zp3	0.0863470620321057	0	4.32804458550702	0	1	NA
ENSMUSG00000004951	15507	Hspb1	3512.32658146695	-0.383970060873022	0.261972609121141	-1.46568781431446	0.142733355428221	0.355952977219314
ENSMUSG00000004952	54153	Rasa4	567.064500931376	0.244932802303544	0.138090021586578	1.77371832873513	0.0761097531352369	0.248764411153927
ENSMUSG00000004961	53420	Syt5	0.664829907433768	-1.29680188865629	1.84494590926103	-0.702894259472193	0.482121648889706	NA
ENSMUSG00000004980	53379	Hnrnpa2b1	5275.57615617951	-0.147442742806402	0.0875040550912101	-1.68498182915883	0.0919920773391749	0.277745710762451
ENSMUSG00000004988	108017	Fxyd4	1.52830594927882	1.24980457098718	1.25558800654213	0.99539384294465	0.319544751980721	NA
ENSMUSG00000004994	67736	Ccdc130	68.6338757070109	0.0983417602794674	0.17600117546256	0.55875626978632	0.576328070879939	0.768475826672012
ENSMUSG00000004996	67873	Mri1	221.561215891104	-0.00437933239594151	0.129325126896225	-0.0338629661616773	0.972986424961812	0.987418033151327
ENSMUSG00000005034	18749	Prkacb	675.707165663902	-0.227887169350946	0.0945532467864202	-2.41014642115573	0.0159461194249346	0.107806690489267
ENSMUSG00000005043	27029	Sgsh	75.0446085558955	-0.153491905118959	0.187864764034258	-0.817034029281665	0.413908981458906	0.650839555760133
ENSMUSG00000005045	269610	Chd5	5.82799761719794	-0.476439975470854	0.615082482796385	-0.774595259654912	0.438578859270345	NA
ENSMUSG00000005054	13014	Cstb	297.286777248528	0.607589211143742	0.190391560640285	3.19126125706636	0.00141653127054217	0.030114675582007
ENSMUSG00000005057	23921	Sh2b2	98.727759136623	0.210528922986523	0.296046275036971	0.711135186417162	0.477000467493811	0.699002020052752
ENSMUSG00000005069	19305	Pex5	463.956402922872	0.0376108016854796	0.10523711375951	0.357391041447872	0.720799082409562	0.8592656681119
ENSMUSG00000005078	104771	Jkamp	169.143280875054	0.2388199099451	0.133804203212716	1.78484609758809	0.0742862838130029	0.245564715804607
ENSMUSG00000005087	12505	Cd44	582.946531969016	0.196677789149603	0.262009584167215	0.750651125128624	0.452862644220918	0.679879981905648
ENSMUSG00000005089	20511	Slc1a2	2.10631343186833	0.63242789874139	1.1659527946807	0.54241295327448	0.58753405825292	NA
ENSMUSG00000005102	27103	Eif2ak4	84.5882999094522	-0.150799194607313	0.195058979863654	-0.773095372039376	0.43946593981566	0.669977153125639
ENSMUSG00000005103	22388	Wdr1	1139.64761777105	0.10362877303765	0.111383590159153	0.930377382247945	0.352175724934041	0.594851059889856
ENSMUSG00000005107	117591	Slc2a9	16.7695764232795	0.151613025863758	0.350586480255742	0.432455426555984	0.66541044152157	0.82525261654224
ENSMUSG00000005124	22402	Ccn4	67.2142245767573	1.01851278996227	0.299115813381004	3.40507838234858	0.000661450653343772	0.0219529219326184
ENSMUSG00000005125	17988	Ndrg1	280.930029880175	-0.132435749533151	0.150520115100794	-0.87985416065133	0.378938319873524	0.619279160185272
ENSMUSG00000005131	75311	4930550C14Rik	3.51438807386456	0.391410659229156	0.707816218250919	0.552983456915368	0.580274738160712	NA
ENSMUSG00000005142	17159	Man2b1	699.153638372419	0.513372083885018	0.181531370571884	2.82800753537928	0.00468387040144835	0.0560843968739856
ENSMUSG00000005148	12224	Klf5	128.540079076074	0.46672963255779	0.187653421847367	2.4871895644803	0.0128756770880628	0.0966194465336932
ENSMUSG00000005150	67836	Wdr83	269.026679456798	0.269324696836353	0.164629591760824	1.63594341670744	0.101851430203221	0.292803659075925
ENSMUSG00000005161	21672	Prdx2	1334.96580376443	0.283504716019328	0.15935693530609	1.77905477081858	0.0752307828856839	0.247354471079969
ENSMUSG00000005198	20020	Polr2a	854.980488356757	-0.165004256001238	0.124114326220514	-1.32945374660516	0.183698315944012	0.41122532404782
ENSMUSG00000005202	20415	Shbg	3.51028971989319	0.626125642276989	0.760998165781109	0.822768924330214	0.410639411606623	NA
ENSMUSG00000005204	80886	Senp3	422.409436442112	-0.082501728262272	0.0885004224844423	-0.932218467960141	0.35122363313898	0.593847545243584
ENSMUSG00000005220	53419	Corin	2.10860893920229	0.573004362593879	1.23842491360845	0.46268801305385	0.643588011596367	NA
ENSMUSG00000005225	231999	Plekha8	71.6238589326188	-0.340783341687333	0.207356302839481	-1.64346748577564	0.100286247221765	0.290402358974048
ENSMUSG00000005232	14378	G6pc2	0	NA	NA	NA	NA	NA
ENSMUSG00000005233	66442	Spc25	22.5133243841412	1.54392363790365	0.559834397792912	2.75782203449879	0.00581878671837887	0.063299739320885
ENSMUSG00000005237	327954	Dnah2	5.51080898943965	0.0884436583844747	0.547665656290477	0.161492066133073	0.871705859652255	NA
ENSMUSG00000005251	72388	Ripk4	0.358819169345583	0.485760169166612	2.13941431961218	0.227052873636308	0.820382628403024	NA
ENSMUSG00000005262	22230	Ufd1	520.247338887423	-0.152985063735684	0.0836603658193455	-1.82864445113755	0.0674528890416125	0.234119782932673
ENSMUSG00000005267	170740	Zfp287	20.8688170296682	0.18296661852853	0.290967892659348	0.628820647035233	0.529466481266381	0.737692334279037
ENSMUSG00000005268	19116	Prlr	7.17541665880769	1.1303887066689	0.59217527763612	1.90887520867344	0.0562781918425637	NA
ENSMUSG00000005299	56384	Letm1	1116.53619154241	-0.0995649472104784	0.115844554251415	-0.859470243153553	0.39008113032805	0.628903195951529
ENSMUSG00000005312	56085	Ubqln1	1027.20160541419	-0.22525620312854	0.115701468767011	-1.94687418862538	0.0515498198140027	0.201493239185239
ENSMUSG00000005320	14186	Fgfr4	102.635637618178	0.970059272686898	0.297385299025664	3.26196108504739	0.00110644331461743	0.0272179328235602
ENSMUSG00000005338	94332	Cadm3	208.160982456788	-0.216910429264365	0.187369357811044	-1.15766223356069	0.247001901676769	0.488843166675629
ENSMUSG00000005339	14125	Fcer1a	4.12493201939241	0.748359097809922	0.657195521717268	1.13871606406331	0.254821600353329	NA
ENSMUSG00000005354	56551	Txn2	2121.16289152073	0.137210842980117	0.130688498085081	1.0499075663934	0.293760612484821	0.538890979206996
ENSMUSG00000005355	12365	Casp14	0.0650420713777673	0.450636287739379	4.32804458550702	0.10412006596429	0.917074067068648	NA
ENSMUSG00000005357	20513	Slc1a6	0.393727947447077	-2.06205189567712	2.53486433388082	-0.813476235440247	0.41594506605987	NA
ENSMUSG00000005360	20512	Slc1a3	62.5138320857671	0.40087147238398	0.386412254674894	1.03741914893784	0.299540557885086	0.544255770570994
ENSMUSG00000005362	58799	Crbn	253.493777499714	-0.358942327245278	0.128822212168883	-2.78633879361359	0.00533071251955876	0.0603755232902826
ENSMUSG00000005364	16192	Il5ra	0.881258720515959	-1.22851570114851	1.60008990150869	-0.767779172901579	0.442618389958395	NA
ENSMUSG00000005370	17688	Msh6	99.4914828485934	-0.118120610172083	0.188547808150748	-0.626475647373441	0.531003005182546	0.738554064042262
ENSMUSG00000005371	225055	Fbxo11	508.676280114323	-0.292240919360243	0.117161589284924	-2.49434068916174	0.0126191359077923	0.0957282659006834
ENSMUSG00000005373	58805	Mlxipl	993.803929332576	-0.0864115752321823	0.152181419389273	-0.567819485315389	0.570157547467005	0.764610244144846
ENSMUSG00000005374	27368	Tbl2	176.722913738763	0.0787708880930609	0.154972602685649	0.508289121612302	0.611250597894908	0.792132230237498
ENSMUSG00000005378	66138	Bud23	259.408140022459	-0.0359730647039574	0.120781437201801	-0.2978360378661	0.765828307812262	0.885337603572584
ENSMUSG00000005397	18073	Nid1	2480.70882134199	-0.108533958339943	0.126605104118681	-0.857263686922142	0.391299172392622	0.630064392718122
ENSMUSG00000005410	17218	Mcm5	84.989242105392	0.738790576450605	0.547641727218739	1.34903996487382	0.177324129726621	0.402767881990566
ENSMUSG00000005413	15368	Hmox1	313.028270736715	-0.352533794603852	0.337801177740755	-1.04361327856117	0.296664346914998	0.54146316231736
ENSMUSG00000005417	26936	Mprip	1473.28896131373	-0.247348362480746	0.111719865152691	-2.21400520080011	0.0268284211704684	0.141040351886293
ENSMUSG00000005442	71722	Cic	622.397461757189	-0.0852623897377147	0.181972244666342	-0.468546123031285	0.639394095517162	0.807744349988788
ENSMUSG00000005447	18476	Pafah1b3	23.2632513406512	0.780422427624143	0.308495651109921	2.52976800423701	0.0114137968069044	0.0909151504463989
ENSMUSG00000005465	50931	Il27ra	18.8180941329236	0.109932499783396	0.32152131167773	0.341913570860226	0.732415936411304	0.86476932952209
ENSMUSG00000005469	18747	Prkaca	1612.27945194308	0.0922623676361174	0.0997844848211397	0.924616364973919	0.355165497435398	0.59689370026129
ENSMUSG00000005470	66929	Asf1b	25.6677522196596	1.1269166983809	0.618812428993758	1.82109577245138	0.0685922998075251	0.235894649945694
ENSMUSG00000005474	59310	Myl10	40.3432293082751	-0.752785959819545	0.446756023040268	-1.68500461324882	0.0919876814489952	0.277745710762451
ENSMUSG00000005481	68278	Ddx39a	229.137504262629	0.454690510509617	0.215798837018188	2.10701094033836	0.0351166312588538	0.163826455202098
ENSMUSG00000005483	81489	Dnajb1	201.214235012383	-0.234555393823145	0.280246074009892	-0.836962282707542	0.402613769256153	0.640705261142127
ENSMUSG00000005493	55993	Msh4	0.19635094481838	1.13009322367367	3.42520398539126	0.329934575719753	0.741449397326987	NA
ENSMUSG00000005501	227334	Usp40	179.267773925595	-0.038762440090258	0.125416384312247	-0.309069985575024	0.757268290202209	0.879786549957382
ENSMUSG00000005503	14028	Evx1	0	NA	NA	NA	NA	NA
ENSMUSG00000005505	67136	Kbtbd4	38.8399350914547	-0.338280780183047	0.272688067169056	-1.24054119307438	0.214775287758789	0.450697057137113
ENSMUSG00000005506	13046	Celf1	1164.1031618709	-0.275988071098041	0.143951346833261	-1.91723160060265	0.0552085151267309	0.209855273168332
ENSMUSG00000005510	68349	Ndufs3	2869.46299051457	0.0362341095655284	0.139086531052173	0.260514870069889	0.794466646549065	0.90098994971975
ENSMUSG00000005514	18984	Por	455.162611117222	0.028365512071771	0.192767313309997	0.147148972430587	0.883014436146227	0.945975478325274
ENSMUSG00000005533	16001	Igf1r	268.303442822523	-0.171814878700192	0.153269178573493	-1.12100084504469	0.262287502708791	0.505464949825574
ENSMUSG00000005534	16337	Insr	711.688645932891	-0.443832461574021	0.150519678339968	-2.94866735345772	0.00319147291380784	0.0465362094164199
ENSMUSG00000005540	14128	Fcer2a	1.80242275242161	-0.509398091368233	1.00778649446531	-0.505462311874398	0.613234162791213	NA
ENSMUSG00000005547	13087	Cyp2a5	0	NA	NA	NA	NA	NA
ENSMUSG00000005553	11944	Atp4a	0.155528887091853	-0.270704476511791	4.32804458550702	-0.0625466007023768	0.950127552564795	NA
ENSMUSG00000005566	21849	Trim28	821.1688238624	0.266579106068181	0.155519900309885	1.71411572111996	0.0865074750654031	0.267357593774058
ENSMUSG00000005575	22192	Ube2m	1419.8364214326	0.0923158054365719	0.0927554552753594	0.995260118798595	0.31960976904836	0.563688844593091
ENSMUSG00000005580	11515	Adcy9	335.069417783312	-1.34143693338909	0.441443770294232	-3.03874926696778	0.00237562482722062	0.0398581628622461
ENSMUSG00000005583	17260	Mef2c	6785.03486168284	-0.0781992659122219	0.110099810385765	-0.71025795265432	0.477544189082117	0.699364182246341
ENSMUSG00000005609	22083	Ctr9	277.952535826856	-0.0516255123472456	0.12937387069622	-0.399041259795546	0.689862802870697	0.84078008948367
ENSMUSG00000005610	13690	Eif4g2	8364.03532985246	-0.189051013101847	0.0789455160402056	-2.39470235403321	0.0166338621368899	0.109752928558538
ENSMUSG00000005611	17540	Irag1	86.6579212743782	-0.377149702540073	0.184691516784785	-2.04205211536355	0.0411463620511688	0.1766328064629
ENSMUSG00000005615	13026	Pcyt1a	1271.79946210504	-0.57681833983334	0.158204839786885	-3.6460220851041	0.000266331096546313	0.0155646696355209
ENSMUSG00000005621	233410	Zfp592	312.044325377038	-0.619918708288237	0.200626103938796	-3.08992048451159	0.00200210087521548	0.0367934295828168
ENSMUSG00000005625	19185	Psmd4	1689.19783957684	-0.239391525520498	0.109130570069401	-2.19362480529753	0.0282623936398668	0.145197095087833
ENSMUSG00000005628	50874	Tmod4	4086.2902565458	-0.130942699793318	0.132924496433195	-0.985090809496707	0.324579467331737	0.568834789588867
ENSMUSG00000005640	23920	Insrr	2.04789240873537	0.417661869616284	1.11244168780171	0.375446078833691	0.707328741038635	NA
ENSMUSG00000005649	29865	Cabp5	0.312015952150088	0.40559655118431	3.62193443360404	0.111983405171892	0.910836564554692	NA
ENSMUSG00000005656	72183	Snx6	392.747741706412	0.17807293819741	0.134589802197825	1.32307897990423	0.185809114194646	0.414074452578587
ENSMUSG00000005667	17768	Mthfd2	128.612948608374	0.31682757107526	0.290847061679884	1.08932704784885	0.27600968924345	0.520865809601995
ENSMUSG00000005672	16590	Kit	47.8467397114453	-0.393032934029223	0.278773808910848	-1.40986319900273	0.158580080991897	0.379297087648646
ENSMUSG00000005674	641376	Tomm40l	176.636275824691	0.278413107321508	0.132133282224207	2.10706267667739	0.0351121470279059	0.163826455202098
ENSMUSG00000005677	12355	Nr1i3	0.113726089166523	0.450636287739379	4.32804458550702	0.10412006596429	0.917074067068649	NA
ENSMUSG00000005681	11807	Apoa2	5.1507940875355	-2.37910220883297	1.05416625169504	-2.25685673868566	0.0240170280141395	NA
ENSMUSG00000005682	103135	Pan2	204.291025061623	-0.105632811952049	0.149993579031829	-0.704248892745161	0.481277787562519	0.702462339094096
ENSMUSG00000005683	12974	Cs	9138.95267992219	-0.221292440829726	0.122889504146624	-1.80074321534973	0.0717433627599507	0.241705790292497
ENSMUSG00000005686	11717	Ampd3	270.353088601144	-0.85978615216295	0.225035693913218	-3.82066567846128	0.000133091963596087	0.0114562127632193
ENSMUSG00000005687	68183	Bcas2	611.614521188995	0.11250137275448	0.121199597873938	0.92823222789481	0.353287120419843	0.595558256509931
ENSMUSG00000005696	20400	Sh2d1a	0.364199985855253	-0.101115453915528	2.4738272688401	-0.0408740962593309	0.967396268374802	NA
ENSMUSG00000005698	13018	Ctcf	541.831918095571	-0.244874227569401	0.0970724490076936	-2.52259245617666	0.0116493322344047	0.0916584913022492
ENSMUSG00000005699	56513	Pard6a	69.4108781619954	0.184629431884577	0.177368895876874	1.04093466315956	0.297905872802851	0.542800050547552
ENSMUSG00000005705	11604	Agrp	3.06096377431636	0.129059687145916	0.798780029084441	0.16157099883161	0.87164369677448	NA
ENSMUSG00000005716	19293	Pvalb	117672.400590131	0.0845052420784928	0.205718526099526	0.410780903794778	0.681233196912594	0.836155778583977
ENSMUSG00000005718	83383	Tfap4	82.8530161399382	-0.0550119683136716	0.204762716270887	-0.268662036309846	0.788189768589386	0.89825050409453
ENSMUSG00000005732	19385	Ranbp1	162.510023070244	0.331818683061683	0.278298942393741	1.19231025532329	0.233139614824963	0.4721072328237
ENSMUSG00000005763	12503	Cd247	22.7394436354876	0.288352341517737	0.380831534238858	0.757165086378803	0.44895096431013	0.676822466510581
ENSMUSG00000005774	53970	Rfx5	53.1881164618906	-0.410513443863647	0.244108349039191	-1.68168538880143	0.0926298627905561	0.278551946860604
ENSMUSG00000005779	19172	Psmb4	1657.2294724316	0.0922323667770486	0.0939954357927094	0.981243035890073	0.326472906279655	0.570878311347728
ENSMUSG00000005800	17394	Mmp8	5.80008719831675	-0.799009582284169	0.801926650578757	-0.996362425051615	0.319074082892247	NA
ENSMUSG00000005802	22785	Slc30a4	345.555571316118	-0.27833674566433	0.14696808888834	-1.89385837272333	0.0582438111235853	0.215978023349326
ENSMUSG00000005803	59010	Sqor	429.65531192786	-0.0045889186340045	0.134455220964267	-0.03412971695033	0.972773711583993	0.987352366675818
ENSMUSG00000005804	18457	Bloc1s6	278.110234727491	-0.0744409669550673	0.104297911660598	-0.713734012214069	0.475391670475568	0.698071281915588
ENSMUSG00000005813	75624	Metap1	777.074494647335	-0.142198265344987	0.103787239265617	-1.37009391858923	0.170657585960391	0.394202477819172
ENSMUSG00000005823	78308	Gpr108	416.762795791969	0.133636712343022	0.10783288229395	1.23929463351198	0.215236405378965	0.451238862439684
ENSMUSG00000005824	50930	Tnfsf14	4.47343396352758	-0.964305081914228	0.824585472980192	-1.16944223917633	0.242225500147426	NA
ENSMUSG00000005836	14465	Gata6	9.03711355174327	0.797344293890254	0.6530391429179	1.22097473411406	0.222095586207679	NA
ENSMUSG00000005846	66409	Rsl1d1	671.964652193971	-0.0417043278065578	0.0834777126444599	-0.499586374439616	0.617366353998636	0.795301855773111
ENSMUSG00000005864	12789	Cnga2	0.56574378258444	2.21933955343261	1.83504827991315	1.20941752744383	0.226502478206096	NA
ENSMUSG00000005871	11789	Apc	410.712714618423	-0.239477018479864	0.107311338122694	-2.23160965718327	0.0256407728202384	0.138221895340453
ENSMUSG00000005873	13476	Reep5	2183.48586097293	0.020534099971544	0.0772688339973734	0.265748800768005	0.790432676693667	0.898955718276976
ENSMUSG00000005881	66366	Ergic3	647.720444157776	0.436376892947871	0.156573806863799	2.78703636124444	0.00531925100998328	0.0603755232902826
ENSMUSG00000005882	56046	Uqcc1	1258.94295534587	-0.232066452311936	0.128502360612193	-1.80593143352664	0.0709290504065048	0.240369669932331
ENSMUSG00000005883	26972	Spo11	0.873003410378741	-3.24313080182803	1.57048157712747	-2.06505497998898	0.0389177984738034	NA
ENSMUSG00000005886	17978	Ncoa2	292.594354094123	-0.46661132970786	0.158623145166363	-2.94163458440116	0.00326484937159876	0.0469918838855083
ENSMUSG00000005891	19110	Prl4a1	0	NA	NA	NA	NA	NA
ENSMUSG00000005892	22044	Trh	0	NA	NA	NA	NA	NA
ENSMUSG00000005893	22026	Nr2c2	91.6657632797456	-0.570840910666341	0.290705763180684	-1.96363809379157	0.0495720764352039	0.197488994863688
ENSMUSG00000005897	22025	Nr2c1	111.522223153745	-0.0570040774603812	0.166272741100228	-0.342834773055311	0.73172276443523	0.864486418409177
ENSMUSG00000005899	77626	Smpd4	203.595141929124	-0.138088460599138	0.118850663768425	-1.16186528724987	0.245290189330922	0.486496522820437
ENSMUSG00000005907	71382	Pex1	72.4024313101448	0.120775532766387	0.181250976599874	0.666344176633093	0.505191134836271	0.719498304972835
ENSMUSG00000005917	18423	Otx1	0.0362982788231126	0	4.32804458550702	0	1	NA
ENSMUSG00000005936	66989	Kctd20	591.135412962311	-0.220641166551712	0.111378164046626	-1.98100919008995	0.0475902429834243	0.192699268145078
ENSMUSG00000005947	16407	Itgae	13.7470672200024	0.400670146997577	0.398137573328754	1.0063610516527	0.314241922098891	NA
ENSMUSG00000005949	83429	Ctns	117.011616913775	0.0863118510979117	0.147976342205457	0.583281420607577	0.559703867777753	0.75828147410595
ENSMUSG00000005950	94045	P2rx5	182.044393908359	-0.105566352593193	0.151290270666621	-0.69777357214078	0.485318809057748	0.704790536394841
ENSMUSG00000005951	74637	Shpk	22.9741444654993	0.523745287261098	0.300686606214433	1.74183111730488	0.081538000005058	0.258342435542029
ENSMUSG00000005952	193034	Trpv1	6.24614719437349	-0.357212267036604	0.569233805608432	-0.62753171634772	0.530310752810025	NA
ENSMUSG00000005958	13845	Ephb3	86.4539227170046	0.688577513679312	0.279135352315514	2.46682302319412	0.0136317713193407	0.0993852966899694
ENSMUSG00000005968	22156	Tuft1	12.2275314621179	0.392759394326276	0.396614518208737	0.990279922429787	0.322037317298105	NA
ENSMUSG00000005973	19672	Rcn1	315.056546785636	0.516777477037543	0.170765727659754	3.02623649440483	0.00247618545286186	0.0407308912176881
ENSMUSG00000005980	13419	Dnase1	11.4693867412383	0.23025398034551	0.511586551614778	0.450078250921049	0.652654018435546	NA
ENSMUSG00000005981	68015	Trap1	1453.49356612417	-0.105672360833	0.0774202614774152	-1.36491867653827	0.172278611491054	0.395822496041612
ENSMUSG00000005982	74763	Naa60	263.486786611651	-0.291895524498298	0.120620320264939	-2.419953154304	0.015522506655731	0.106508700574419
ENSMUSG00000005983	73261	1700037C18Rik	22.6095475316365	0.297897581035487	0.285323466217018	1.04406968338491	0.296453150977466	0.54134465764304
ENSMUSG00000005983	105246059	1700037C18Rik	22.6095475316365	0.297897581035487	0.285323466217018	1.04406968338491	0.296453150977466	0.54134465764304
ENSMUSG00000005986	68423	Ankrd13d	16.6415073927548	0.572767364803628	0.346417803728264	1.65340048530796	0.0982493841690344	0.28733960622167
ENSMUSG00000005994	22178	Tyrp1	0.214876084783002	-0.992046429652369	4.04168148983045	-0.245453886494649	0.806105009398687	NA
ENSMUSG00000006005	108989	Tpr	933.918502996223	-0.264038347648809	0.144975312025446	-1.82126421360946	0.0685667035322157	0.235894649945694
ENSMUSG00000006007	20028	Pdc	0.193117777394749	-2.21818609763451	4.29362466482932	-0.516623196201686	0.605419219878408	NA
ENSMUSG00000006010	226499	Odr4	339.711129233494	0.00801010170778846	0.0972406169827431	0.0823740321311411	0.934349285214554	0.969897157343233
ENSMUSG00000006014	96875	Prg4	977.710054700774	-0.965332083082931	0.53253659675091	-1.81270562243529	0.0698772368529441	0.238239761729112
ENSMUSG00000006019	71723	Dhx34	116.7290621358	0.438475977763881	0.19570982414496	2.24043928136744	0.0250624185193539	0.136371446935245
ENSMUSG00000006021	70394	Kptn	157.444624275926	0.0838757403163714	0.146266559421395	0.573444406214031	0.566343830730303	0.762170606173462
ENSMUSG00000006024	108124	Napa	1916.0843893821	-0.196233102224547	0.154688477141947	-1.26856961714399	0.204594606399487	0.43752223731078
ENSMUSG00000006050	24068	Sra1	717.653657660653	-0.05135775128591	0.125530284095062	-0.409126384570416	0.682446914486971	0.836952544635092
ENSMUSG00000006056	76815	Calcoco2	0	NA	NA	NA	NA	NA
ENSMUSG00000006057	11951	Atp5g1	6460.01780502186	-0.0212498179155559	0.159407614313277	-0.133304911481798	0.893952243468632	0.950821973242864
ENSMUSG00000006058	27681	Snf8	337.205039927334	0.240808824802411	0.129244553431966	1.8632028848254	0.0624337271711503	0.224889521575996
ENSMUSG00000006095	66411	Tbcb	353.10319203665	0.162172105799901	0.109130981678429	1.4860317693995	0.13727071798333	0.34885269997422
ENSMUSG00000006127	19062	Inpp5k	409.895226595217	0.029184596356291	0.115149756302076	0.253449050119829	0.799921228105215	0.904300036043025
ENSMUSG00000006134	12929	Crkl	506.909494674867	-0.288952524111277	0.113948074499999	-2.53582629964739	0.0112182362713733	0.0900022299053892
ENSMUSG00000006143	69665	Upk3bl	0	NA	NA	NA	NA	NA
ENSMUSG00000006154	67425	Eps8l1	36.5080505436808	0.104770787665212	0.554214422293547	0.189043777012571	0.850058506240842	0.929477183270391
ENSMUSG00000006169	216705	Clint1	753.801665884428	-0.219318508257916	0.112029654634068	-1.95768262407212	0.0502672653898704	0.199083032027281
[truncated: 50,313 more rows]

## Sheet: SGCA_KO_vs_SGCA_LICA1
Differential gene expression analysis, comparison between SGCA_KO and SGCA_LICA1
[truncated: 51,344 more rows]

[truncated: 2 more sheets: SGCA_AAV9_vs_WT, SGCA_LICA1_vs_WT]
