# Supplementary material for: An integrin-targeting AAV developed using a novel computational rational design methodology presents improved targeting of the skeletal muscle and reduced liver tropism
Source: Research Square preprint supplement (doi:10.21203/rs.3.rs-3466229/v1), 2023-10-27
Supplement: Supplementary file 2 [file fd9a8f36bfe10d2fe1e82f7c.xlsx]

## Sheet: mdx_KO_vs_WT
Differential gene expression analysis, comparison between mdx_KO and WT
ensembl_gene_id	entrezgene_id	external_gene_name	baseMean	log2FoldChange	lfcSE	stat	pvalue	padj
ENSMUSG00000000001	14679	Gnai3	236.41964219386	0.508177935633644	0.116768955375312	4.35199521996484	1.34904204001189e-05	6.36680880368055e-05
ENSMUSG00000000003	54192	Pbsn	0	NA	NA	NA	NA	NA
ENSMUSG00000000028	12544	Cdc45	42.270087299657	1.32115645622632	0.271322939562666	4.86931351383643	1.11986612299818e-06	6.35863139190825e-06
ENSMUSG00000000031	14955	H19	10558.2404291624	1.46526658146346	0.17590845493849	8.32971093956694	8.10399805564365e-17	1.92179163303069e-15
ENSMUSG00000000037	107815	Scml2	3.03926529895379	2.25492280756499	0.842263956786325	2.67721631609252	0.00742366887270122	0.0196945108537824
ENSMUSG00000000049	11818	Apoh	7.14332369475111	-0.244825127385336	0.597749432887972	-0.409578184294523	0.682115402825377	0.783994684767236
ENSMUSG00000000056	67608	Narf	1324.50216095959	-1.15322163537442	0.114998557837192	-10.0281399789994	1.1465607866657e-23	7.78155750061298e-22
ENSMUSG00000000058	12390	Cav2	311.923133812135	-0.424381736239102	0.162730075013917	-2.60788754754036	0.00911028777289979	0.0235400680218358
ENSMUSG00000000078	23849	Klf6	636.606408254536	0.574071454372083	0.198900721905725	2.886221069847	0.00389898181244351	0.0111777772856069
ENSMUSG00000000085	29871	Scmh1	397.004199950319	-0.684960109899282	0.113612159108506	-6.02893312893653	1.65045555815583e-09	1.45212713599944e-08
ENSMUSG00000000088	12858	Cox5a	2007.31558868053	-0.461599461676437	0.115164022827009	-4.00819153712457	6.11854886492658e-05	0.000254344379192256
ENSMUSG00000000093	21385	Tbx2	88.7548906086807	0.0244684760469866	0.18525707045282	0.132078500362652	0.894922201142528	0.936407122530623
ENSMUSG00000000094	21387	Tbx4	67.8721806704724	1.44941873635134	0.230929966532032	6.27644284593225	3.46406639089639e-10	3.36344827751919e-09
ENSMUSG00000000103	22768	Zfy2	0	NA	NA	NA	NA	NA
ENSMUSG00000000120	18053	Ngfr	25.6988885721054	1.57263163117322	0.321152695319603	4.89683460264339	9.73927453389741e-07	5.59126011178141e-06
ENSMUSG00000000125	22415	Wnt3	0.537149057280222	-1.17775705979171	1.9076783140016	-0.617377181020217	0.536985969597016	NA
ENSMUSG00000000126	216795	Wnt9a	168.228176902622	-0.866097618437883	0.164336915822264	-5.27025601097805	1.36233608486488e-07	8.94966883061758e-07
ENSMUSG00000000127	14158	Fer	97.7863978748727	-0.192690537564157	0.139239581306715	-1.38387759971571	0.166395936784692	0.274067894898598
ENSMUSG00000000131	74204	Xpo6	306.342638904295	0.358834200391493	0.123405241248231	2.90777115106234	0.00364014615829249	0.010521139390981
ENSMUSG00000000134	209446	Tfe3	205.376428532282	0.675619835045867	0.133301634196651	5.06835373112659	4.01271164960594e-07	2.45624745584898e-06
ENSMUSG00000000142	12006	Axin2	66.9020296826505	-0.560812775831164	0.19808514748008	-2.83117024656057	0.00463780280392895	0.0130255247483344
ENSMUSG00000000148	231841	Brat1	108.188569569659	0.177883142052698	0.152403232303264	1.16718746291897	0.243134672747667	0.368818904167273
ENSMUSG00000000149	14673	Gna12	516.917095763372	0.117134331780705	0.0899342157389558	1.30244457927671	0.192764451698109	0.308158725776217
ENSMUSG00000000154	18400	Slc22a18	8.41327695725476	0.692982207542635	0.55211784640107	1.25513459139163	0.209429905042937	0.328366412255015
ENSMUSG00000000157	16415	Itgb2l	0.0517834982841109	0.606966676079468	4.32794324778021	0.140243677268823	0.888467463415622	NA
ENSMUSG00000000159	72058	Igsf5	0.13300336699194	0	4.32794324777829	0	1	NA
ENSMUSG00000000167	72614	Pih1d2	3.27958440975854	0.473057235909252	0.746329175336345	0.633845294465489	0.526181790071031	0.655799563622196
ENSMUSG00000000168	235339	Dlat	3127.20560151053	-0.649233399472304	0.103130515489937	-6.29525990816613	3.06885217307184e-10	3.00723642453131e-09
ENSMUSG00000000171	66925	Sdhd	2954.74758334456	-0.20381069881474	0.112137091909716	-1.81751368208149	0.0691384952408368	0.133463383314456
ENSMUSG00000000182	64654	Fgf23	0.840587080036829	-1.54246701781471	1.65597364072098	-0.931456262276701	0.351617599154948	0.488561104719535
ENSMUSG00000000183	14177	Fgf6	70.26955277911	-1.65732384235815	0.193656589599462	-8.55805550322854	1.14787101941859e-17	3.13943502556588e-16
ENSMUSG00000000184	12444	Ccnd2	229.673105648709	-0.0745533657166594	0.16912374980726	-0.440821385533512	0.659342310170072	0.766147630489315
ENSMUSG00000000194	277463	Gpr107	437.888822485365	-0.0057136643050819	0.0955229145012238	-0.0598145935445542	0.952303302420769	0.970659207050591
ENSMUSG00000000197	338370	Nalcn	6.48840216884302	-0.534856496569902	0.48868310975556	-1.09448533393642	0.273742176174927	0.403940047229723
ENSMUSG00000000202	72014	Btbd17	6.6373851156632	2.30478041493634	0.862649955969825	2.67174466188341	0.00754580419684318	0.0199895880136375
ENSMUSG00000000204	20558	Slfn4	28.0643326435537	4.71880675682097	0.770224106286821	6.12653735231672	8.98121299532142e-10	8.2213583263712e-09
ENSMUSG00000000214	21823	Th	2.32925843282266	2.97821770172085	1.49600109583169	1.99078577550448	0.0465044438455645	0.0959752303261026
ENSMUSG00000000215	16334	Ins2	0.35189502859296	-0.72529464278799	3.32650040708424	-0.21803533865301	0.827401577465882	NA
ENSMUSG00000000216	20278	Scnn1g	0.115898256123434	1.48215313471655	4.31506538943562	0.343483354469028	0.731234861199949	NA
ENSMUSG00000000223	13497	Drp2	117.105988220365	0.0186943246810932	0.230613617567325	0.0810634032729467	0.935391529826679	0.960706205757009
ENSMUSG00000000244	27027	Tspan32	18.256665654204	2.63650328032962	0.381229466942882	6.91579090533587	4.65260224460583e-12	5.89086076912812e-11
ENSMUSG00000000247	16870	Lhx2	3.04727334136791	1.47021519670562	0.718402336736449	2.04650670178008	0.0407065437782626	0.085792743929155
ENSMUSG00000000248	70809	Clec2g	1.09058182640498	3.42494575381833	1.506804752665	2.27298576524983	0.023027037766047	0.0525955807648963
ENSMUSG00000000253	66355	Gmpr	1927.83592374866	-0.307327264978151	0.129373372486336	-2.3755063277075	0.0175248919166822	0.041666577773598
ENSMUSG00000000263	14654	Glra1	0.0964101638055974	0	4.32794324778021	0	1	NA
ENSMUSG00000000266	23947	Mid2	68.4521159056381	0.0467371780027822	0.180655220841653	0.258709257252787	0.795859576425949	0.868222194188334
ENSMUSG00000000275	217069	Trim25	291.469422321801	0.958829511453283	0.148579503408151	6.45330943676235	1.09433587431364e-10	1.13997561852921e-09
ENSMUSG00000000276	56077	Dgke	101.488073202907	-0.298520959130822	0.145487801751633	-2.05186246225946	0.0401830308472627	0.0848757573916246
ENSMUSG00000000278	74617	Scpep1	251.424456137254	1.31343018700866	0.154605516479762	8.49536431114729	1.97313038518678e-17	5.17869650705857e-16
ENSMUSG00000000282	17428	Mnt	131.111989322016	-0.263006463546948	0.151546280372115	-1.73548610299868	0.0826547408857768	0.154595120352102
ENSMUSG00000000290	16414	Itgb2	292.439034843588	3.9525670477737	0.373721204794629	10.5762450646753	3.84042218642396e-26	3.61735467344616e-24
ENSMUSG00000000295	69692	Hddc2	109.219712765095	0.359215283434358	0.194515335685022	1.84671960269515	0.0647877891426476	0.126457583591396
ENSMUSG00000000296	21987	Tpd52l1	211.182764879891	-0.448028317076221	0.143031492173532	-3.13237532705492	0.00173398052918463	0.00538881367973706
ENSMUSG00000000301	18618	Pemt	19.0940527654651	0.739593544258113	0.315559146867706	2.34375568447134	0.0190906721338475	0.044771457615121
ENSMUSG00000000303	12550	Cdh1	6.52503257766208	-1.08475096509849	0.520739995093614	-2.08309516326566	0.0372425501753831	0.0797427325138302
ENSMUSG00000000305	12561	Cdh4	65.1698937713492	-2.62213489521454	0.312403475781889	-8.39342420455411	4.72184110397304e-17	1.15929538529579e-15
ENSMUSG00000000308	12716	Ckmt1	0.317380383664028	0.565683610981815	2.60135096852032	0.217457627912309	0.827851724901319	NA
ENSMUSG00000000317	12029	Bcl6b	238.996971572364	0.1705396936488	0.266565067610674	0.639767600373949	0.522323699318299	0.652483813036623
ENSMUSG00000000318	17312	Clec10a	107.914159289266	1.41364932743348	0.251984632556198	5.6100616656383	2.02254532834699e-08	1.50160022775286e-07
ENSMUSG00000000320	11684	Alox12	35.7370958283064	-0.882658045198733	0.329209890961536	-2.6811407233869	0.00733716540929558	0.0194855392826312
ENSMUSG00000000326	12846	Comt	509.648550135305	-0.160470026657421	0.089532464411925	-1.79231106516987	0.0730831517961844	0.139554479988224
ENSMUSG00000000339	66368	Rtca	172.129602193933	-0.321469070586668	0.125697265412676	-2.55748658915733	0.0105431623220523	0.0267955064861974
ENSMUSG00000000340	13171	Dbt	352.348857015016	-0.654133147896678	0.114620309127998	-5.70695675899981	1.1501398584841e-08	8.85875778657393e-08
ENSMUSG00000000346	23994	Dazap2	921.668637372633	0.188716296776364	0.104296203757679	1.80942632595551	0.0703847963187245	0.135531748127296
ENSMUSG00000000355	68995	Mcts1	297.321688233011	0.0839555622604098	0.12717974730587	0.660133111119452	0.509168412014855	0.640775905661699
ENSMUSG00000000359	19700	Rem1	51.1005258747769	0.770529372724182	0.185636623670546	4.15074007212963	3.31401955239216e-05	0.000144903887456765
ENSMUSG00000000365	30054	Rnf17	1.052781166966	1.48091640817161	1.51322361902651	0.97865007494683	0.327752908041734	0.46361511350156
ENSMUSG00000000374	216131	Trappc10	504.792495592826	-0.789527035203647	0.14936731453324	-5.28580859655173	1.2515069861588e-07	8.28732796320727e-07
ENSMUSG00000000378	216527	Ccm2	255.319974744697	-0.206861723218852	0.112178509667503	-1.84404057276201	0.0651772274935831	0.127054357097678
ENSMUSG00000000381	22373	Wap	0	NA	NA	NA	NA	NA
ENSMUSG00000000384	21379	Tbrg4	603.893026775357	-0.678864998413732	0.107045314823525	-6.34184690411638	2.27026866580789e-10	2.28352322837773e-09
ENSMUSG00000000385	50528	Tmprss2	0.643545226935119	-2.13768273378946	1.72002252073086	-1.24282252588247	0.213933239808361	NA
ENSMUSG00000000386	NA	Mx1	25.1224925993721	3.17135617655642	0.526791855040095	6.02013137867337	1.7427555975588e-09	1.52800019921674e-08
ENSMUSG00000000392	14089	Fap	216.583100693772	1.2266082088145	0.189435821184854	6.47505947472079	9.47746028941643e-11	9.92916668678623e-10
ENSMUSG00000000394	14526	Gcg	0	NA	NA	NA	NA	NA
ENSMUSG00000000399	66108	Ndufa9	2438.66466751877	-0.414730313793375	0.110920917279055	-3.73897299054962	0.000184773575837328	0.00070180534542171
ENSMUSG00000000402	54156	Egfl6	9.97184860491932	-1.42826004346397	0.60252226571405	-2.37046848678918	0.0177655583323391	0.0421344110254099
ENSMUSG00000000409	16818	Lck	7.18279108535449	4.74169669991213	1.0414515796728	4.55296894494303	5.28940837094011e-06	2.67616979249598e-05
ENSMUSG00000000411	58864	Tssk3	0.156170029475683	0.705808988891261	4.09997540903696	0.172149566393875	0.863319946031953	NA
ENSMUSG00000000416	30785	Cttnbp2	9.46265100667684	-0.756201958255026	0.475975258249447	-1.58874215654865	0.11211861717393	0.198766487807819
ENSMUSG00000000420	14423	Galnt1	747.435615213136	-0.633896975095564	0.0980557703094759	-6.46465754228342	1.0152847322765e-10	1.06091728089671e-09
ENSMUSG00000000435	17877	Myf5	27.6339832803332	1.17377567062173	0.267474322507731	4.3883676743879	1.14204586975407e-05	5.46279511073395e-05
ENSMUSG00000000439	67027	Mkrn2	326.224218514065	-0.958623565119353	0.155890691786714	-6.14933165112204	7.78101253057873e-10	7.1978829545147e-09
ENSMUSG00000000440	19016	Pparg	53.1384238654519	-0.220046878643033	0.256452511944835	-0.858041424411421	0.39086958992242	0.5285100657773
ENSMUSG00000000441	110157	Raf1	394.924047321752	-1.01426501107806	0.173145220475138	-5.85788627774278	4.68795477899045e-09	3.83970355465707e-08
ENSMUSG00000000486	54204	Septin1	30.795606295278	1.69491199993246	0.281639760189923	6.01801392953004	1.76570003174431e-09	1.54542837776249e-08
ENSMUSG00000000486	100043580	Septin1	30.795606295278	1.69491199993246	0.281639760189923	6.01801392953004	1.76570003174431e-09	1.54542837776249e-08
ENSMUSG00000000489	18591	Pdgfb	585.302490615716	0.212701238049206	0.108805378979428	1.95487796691948	0.0505974757346813	0.103050754610889
ENSMUSG00000000530	11482	Acvrl1	283.33511979383	0.14209800170324	0.105912415551322	1.34165575361072	0.179707639662031	0.291233871415626
ENSMUSG00000000531	56149	Tamalin	120.922059264388	-0.15662585466353	0.136007469630359	-1.1515974460021	0.249486531387916	0.376217551670998
ENSMUSG00000000532	11479	Acvr1b	454.44609710105	-0.822506985327479	0.130559384578826	-6.2998687377458	2.97897809759287e-10	2.92627980083721e-09
ENSMUSG00000000538	216810	Tom1l2	1155.704091135	-0.586141740922858	0.103017365491028	-5.68973724118294	1.27235004481959e-08	9.7516197161325e-08
ENSMUSG00000000544	59290	Gpa33	0.0920311874483592	1.27980322155059	4.32302130575704	0.296043699772252	0.767196708733927	NA
ENSMUSG00000000552	29813	Zfp385a	192.763849825333	0.250168877619408	0.156667788554437	1.59681118836041	0.110307801207205	0.19622931329394
ENSMUSG00000000555	16402	Itga5	400.296694483188	1.39712957604783	0.126497380284325	11.0447313051665	2.32462065039994e-28	2.92858615313197e-26
ENSMUSG00000000560	14395	Gabra2	0.149859998412631	0	4.32794324777698	0	1	NA
ENSMUSG00000000561	70465	Wdr77	170.080642195054	0.407103128587522	0.144283394690464	2.82155219220406	0.00477918601112136	0.0133685890127912
ENSMUSG00000000562	11542	Adora3	2.97298308230245	3.18128535105698	1.16063503847129	2.74098682670062	0.00612549633272418	0.0166403813448412
ENSMUSG00000000562	69296	Adora3	2.97298308230245	3.18128535105698	1.16063503847129	2.74098682670062	0.00612549633272418	0.0166403813448412
ENSMUSG00000000563	11950	Atp5pb	6778.65569530231	-0.339193544618417	0.0998211085271492	-3.3980142038411	0.000678768958544256	0.00229832788465926
ENSMUSG00000000567	20682	Sox9	72.6157576746219	1.52950532513987	0.265478643567499	5.76131211379715	8.34625371895398e-09	6.57683487931803e-08
ENSMUSG00000000568	11991	Hnrnpd	563.620351613047	0.400710233473444	0.0951853721553684	4.20978795795824	2.55610470222308e-05	0.000114547359899312
ENSMUSG00000000579	100040563	Dynlt1c	30.0995999545305	0.114671410431267	0.289195439279661	0.396518737352482	0.691722387845314	0.791319419511804
ENSMUSG00000000581	57316	C1d	444.790232791015	0.0839663710011099	0.147283354017293	0.57010088859907	0.568609272506502	0.691991614195107
ENSMUSG00000000594	14667	Gm2a	483.215388914271	1.51651527677837	0.178822892480696	8.48054326680841	2.24144861822886e-17	5.83732297127119e-16
ENSMUSG00000000600	79264	Krit1	217.056420997392	-0.146508837433341	0.116898708269249	-1.2532973169891	0.210097524507574	0.329157142973665
ENSMUSG00000000605	12727	Clcn4	655.179578317581	-0.544665460171721	0.0878463441501449	-6.20020634257462	5.63891812753572e-10	5.31884289643133e-09
ENSMUSG00000000606	669149	Vmn2r88	0	NA	NA	NA	NA	NA
ENSMUSG00000000617	108072	Grm6	0	NA	NA	NA	NA	NA
ENSMUSG00000000627	20355	Sema4f	4.3852006600693	0.776336307031747	0.699276186338664	1.11019983548498	0.266912923663472	0.396299631871289
ENSMUSG00000000628	15277	Hk2	3479.12224281191	-1.3727467038846	0.144301683239508	-9.51303320285015	1.85182619646335e-21	9.12646959464833e-20
ENSMUSG00000000631	360013	Myo18a	2640.7204466459	-0.83438081307938	0.102190796756485	-8.16493108540552	3.21618773869445e-16	7.09285516945996e-15
ENSMUSG00000000632	20370	Sez6	5.84279401887693	0.612023870631927	0.622223666263234	0.983607509350195	0.325308531480563	0.460927789620018
ENSMUSG00000000673	107766	Haao	4.03891211271484	2.1552164221458	0.887036966301903	2.42968050264127	0.0151121378942985	0.0366962249771563
ENSMUSG00000000682	23833	Cd52	149.47225838176	4.54076028739798	0.429104703326046	10.581940147013	3.61396094090622e-26	3.42002867069703e-24
ENSMUSG00000000686	67477	Abhd15	4.60036689831086	0.0431963343372866	0.633689723003818	0.0681663798057623	0.945653189725361	0.966758559553619
ENSMUSG00000000690	15414	Hoxb6	17.7218547919947	-0.397809149777131	0.312840102870389	-1.27160535406787	0.20351337348684	0.321275004496877
ENSMUSG00000000693	16950	Loxl3	119.188299921432	1.29074143933577	0.235059226469767	5.49113284647768	3.99363810395016e-08	2.8535896228757e-07
ENSMUSG00000000701	27382	Tcl1b5	0	NA	NA	NA	NA	NA
ENSMUSG00000000706	12231	Btn1a1	0.0614871707126146	0	4.32794324778021	0	1	NA
ENSMUSG00000000708	18519	Kat2b	673.480856262213	-0.787537333608252	0.1623885986378	-4.84970829365192	1.23643171173608e-06	6.97139972404592e-06
ENSMUSG00000000711	19344	Rab5b	996.491317672973	-0.577099412393641	0.126003290625107	-4.58003445410534	4.64899338696193e-06	2.37179852444929e-05
ENSMUSG00000000724	12957	Cryba1	0.0650779221030176	-0.835681072974956	4.32794324778021	-0.193089656016995	0.846888753521154	NA
ENSMUSG00000000730	54427	Dnmt3l	1.01556573387574	1.15879597684474	1.43443618228298	0.807840732935535	0.419182273069091	0.556460305355366
ENSMUSG00000000731	11634	Aire	0.142847566935452	-0.835687828851884	4.32794324778021	-0.193091217007179	0.846887531034479	NA
ENSMUSG00000000732	50723	Icosl	36.4396916612089	0.438606613161238	0.21574801021826	2.03295786004016	0.0420567805930016	0.0882785094671597
ENSMUSG00000000738	234847	Spg7	1082.57911529422	-0.543874780736759	0.104598881059959	-5.19962331552087	1.99692805904318e-07	1.28109735474645e-06
ENSMUSG00000000739	57429	Sult5a1	50.5617950716926	0.697390769009666	0.246638181600511	2.82758640403559	0.00469003569414968	0.0131557263410764
ENSMUSG00000000740	270106	Rpl13	4420.39937475645	0.59369672534615	0.109371949114482	5.42823576020132	5.69138284470103e-08	3.98614329397632e-07
ENSMUSG00000000743	234852	Chmp1a	634.405775418061	0.0346566802350051	0.0731115445927316	0.474024730677767	0.635482271807022	0.747558573260236
ENSMUSG00000000751	68275	Rpa1	706.249245249627	-0.0183090896365853	0.0992845002630042	-0.184410351949041	0.853691549407066	0.909218036637337
ENSMUSG00000000753	20317	Serpinf1	1521.53140363401	0.593966118336359	0.163428860210291	3.63440164467939	0.000278626522230502	0.0010205841920044
ENSMUSG00000000759	259279	Tubgcp3	140.186709998395	-0.0173372112291113	0.128829738711366	-0.134574605231127	0.892948221019126	0.935118313127729
ENSMUSG00000000766	18390	Oprm1	0	NA	NA	NA	NA	NA
ENSMUSG00000000776	67065	Polr3d	262.309028253746	-0.329969077490473	0.115138535972988	-2.86584395660447	0.00415899194175109	0.0118324348016763
ENSMUSG00000000782	21414	Tcf7	20.0402008903992	1.89822677682335	0.385949264225625	4.91833241509601	8.72845974343625e-07	5.04848100569425e-06
ENSMUSG00000000787	13205	Ddx3x	1491.81786058818	-0.636190992479031	0.106783910132821	-5.9577420576538	2.55746749512789e-09	2.18621171752726e-08
ENSMUSG00000000791	16161	Il12rb1	1.11764041764236	2.06981427622625	1.33311750734784	1.55261202768541	0.120515850454482	0.210560630806189
ENSMUSG00000000792	114479	Slc5a5	5.21077505564937	1.17952670871388	0.729000177921819	1.61800606424595	0.105661290773298	0.189384193323614
ENSMUSG00000000794	140493	Kcnn3	65.8034970986022	2.03676304235377	0.24094549498006	8.45321072519875	2.83399520773782e-17	7.2638112895406e-16
ENSMUSG00000000804	237898	Usp32	142.721878389347	-0.443841324330546	0.118052790202219	-3.75968516771409	0.000170127318460039	0.000650712781441936
ENSMUSG00000000805	12351	Car4	81.4634433136929	-0.755134655108192	0.232399385973022	-3.24929711817677	0.00115690570694359	0.00373056284352296
ENSMUSG00000000811	232223	Txnrd3	81.4516454648014	-0.161590881064624	0.160355988289645	-1.00770094580283	0.313598050819373	0.448566272379088
ENSMUSG00000000817	14103	Fasl	1.20309257813221	4.29964489485394	1.59653267396556	2.69311425000419	0.00707880071829788	0.0188949766017572
ENSMUSG00000000823	269401	Zfp512b	173.009060237797	-0.502931237875798	0.185745089785364	-2.70764216947514	0.00677630403912102	0.0181683905981062
ENSMUSG00000000826	13002	Dnajc5	618.314967066466	-0.0624256825873389	0.114490657691974	-0.545246955915731	0.585583680691301	0.706210975930032
ENSMUSG00000000827	66314	Tpd52l2	469.454210640937	0.148177442926074	0.127485226005642	1.16231070508136	0.245109279780736	0.3711717941958
ENSMUSG00000000838	14265	Fmr1	115.517691120465	0.0897117129636769	0.138143308776977	0.64941048363414	0.51607308954006	0.646759839956416
ENSMUSG00000000861	14025	Bcl11a	2.54388947941653	3.06179438136256	1.14480709283533	2.67450682348538	0.00748392532314071	0.0198387010439962
ENSMUSG00000000869	16189	Il4	8.4822797069362	0.782903254126642	0.52900530204805	1.4799535110435	0.138885653629557	0.236705683623149
ENSMUSG00000000876	59038	Pxmp4	201.298777104205	-0.167841870291183	0.113954305794347	-1.47288747995259	0.140781378553567	0.239410296760673
ENSMUSG00000000881	53310	Dlg3	44.1193625978487	0.376424459260741	0.280350650226559	1.3426915862565	0.17937186023608	0.290843794875502
ENSMUSG00000000884	13972	Gnb1l	23.0095151236896	0.298361350485224	0.269219193507385	1.10824695148282	0.267755178774064	0.397245688801627
ENSMUSG00000000889	13166	Dbh	4.85714769864433	6.08111852650778	1.24185965251628	4.89678404011766	9.7417797849761e-07	5.59126011178141e-06
ENSMUSG00000000901	17385	Mmp11	65.3630501832296	1.24921150458284	0.240034955846259	5.20428993426672	1.94739767236303e-07	1.25051592487485e-06
ENSMUSG00000000902	20587	Smarcb1	274.707967117372	0.46444063800817	0.116971175542813	3.97055630032699	7.17050086855873e-05	0.000295091437336746
ENSMUSG00000000903	22364	Vpreb3	0.709302151619787	1.85300313765567	1.73777078258179	1.06631044567493	0.286283329123479	NA
ENSMUSG00000000915	29816	Hip1r	119.804635612714	-0.220627134409456	0.136680873372554	-1.61417708978262	0.106489019868765	0.190512041669895
ENSMUSG00000000916	100609	Nsun5	96.7061665218498	-0.256073042261356	0.193386777739633	-1.32414969241652	0.185453334809891	0.298505379682422
ENSMUSG00000000934	72960	Top1mt	101.9007911191	-0.558439348076624	0.167170460496919	-3.34053843254752	0.000836161068508797	0.00277989422034172
ENSMUSG00000000938	15395	Hoxa10	203.22191258502	-0.0656733055433202	0.190533183824428	-0.34468172013457	0.730333662144486	0.820724515127748
ENSMUSG00000000942	15401	Hoxa4	18.8543646002897	-0.307367672008697	0.312873476297202	-0.982402457524796	0.325901616108423	0.461514604179955
ENSMUSG00000000948	NA	Gm38393	3.41262321983626	-1.76854612633535	0.889392275373048	-1.98848829173106	0.0467577126332736	0.0964090848556563
ENSMUSG00000000957	17387	Mmp14	759.792271102787	2.08336593762441	0.194858573212345	10.6916821943169	1.1133310598117e-26	1.13915807982865e-24
ENSMUSG00000000958	20540	Slc7a7	35.962359050529	1.24506956723751	0.273975094586252	4.54446258743982	5.50755879322881e-06	2.77926000809161e-05
ENSMUSG00000000959	69089	Oxa1l	657.276959269197	-0.307606101660309	0.0762048119779764	-4.0365705744305	5.42382149774902e-05	0.000227861546332069
ENSMUSG00000000976	217026	Heatr6	150.489433684937	-0.451144289243136	0.118696951582423	-3.80080771434019	0.000144225191498588	0.000558637045549009
ENSMUSG00000000982	20302	Ccl3	9.14156404054023	5.42462934684917	1.54336798737754	3.51479970507007	0.000440085775665228	0.00154786406911255
ENSMUSG00000000983	14038	Wfdc18	0.796423573820238	3.68655146416684	1.56334218386609	2.35812191483897	0.0183676595882398	0.0433431180426305
ENSMUSG00000001014	78369	Icam4	0	NA	NA	NA	NA	NA
ENSMUSG00000001016	67781	Ilf2	318.560837554654	0.396210735371515	0.108345319596589	3.65692525387121	0.000255258774382938	0.000941836191696299
ENSMUSG00000001017	66511	Chtop	1378.48241309368	-0.170543368264237	0.0765009211171763	-2.2292982329326	0.0257940681474314	0.0580021231200107
ENSMUSG00000001018	20615	Snapin	751.187991844814	-0.31571015810157	0.0990806868475205	-3.18639452497367	0.00144058004408258	0.00455494461938393
ENSMUSG00000001020	20198	S100a4	3.37120936654937	2.38625270032805	0.870574100495408	2.74101044238524	0.00612505608469854	0.0166403813448412
ENSMUSG00000001021	20197	S100a3	1.32186640573467	2.28522719397428	1.34736676858667	1.69606913815411	0.0898727874421357	0.165909495051848
ENSMUSG00000001023	20199	S100a5	0.345425666280772	-2.11495991518782	2.82360623519457	-0.749027923520675	0.453840375358992	NA
ENSMUSG00000001025	20200	S100a6	1123.07886120158	1.8931903310554	0.165476118456632	11.4408674116414	2.6126027903744e-30	4.57932473439798e-28
ENSMUSG00000001027	110880	Scn4a	2984.16532516001	-1.5486816885984	0.174631627350775	-8.86827725362505	7.42861836425963e-19	2.3919913796866e-17
ENSMUSG00000001029	15896	Icam2	101.359907381381	0.301227766064381	0.170034652264846	1.77156692504766	0.0764664741143742	0.144699091130627
ENSMUSG00000001034	23939	Mapk7	103.902741973705	0.757026284642087	0.161184089102855	4.69665640607376	2.64454750270579e-06	1.41021545005398e-05
ENSMUSG00000001036	13855	Epn2	321.049626905492	-0.63216346857653	0.120954040905966	-5.22647663394722	1.72770641172825e-07	1.11942713407927e-06
ENSMUSG00000001039	27078	B9d1	26.228671821416	0.564220734021409	0.273330563327276	2.06424311702688	0.0389946713001258	0.0827384830943827
ENSMUSG00000001052	99683	Sec24b	255.235942269785	-0.379535679587893	0.115107631493516	-3.29722429923574	0.000976454874413758	0.00320039039082246
ENSMUSG00000001053	212706	N4bp3	97.3592534459706	0.616873583156259	0.145722173291412	4.23321701305298	2.3037201049394e-05	0.000104093445763872
ENSMUSG00000001054	66089	Rmnd5b	187.586327526441	0.142590238974884	0.107103418243646	1.33133228904525	0.183079698272413	0.295652738189155
ENSMUSG00000001056	52530	Nhp2	361.034798199589	0.532779411127131	0.149411124431756	3.56586173321037	0.00036266255015136	0.00129452612420771
ENSMUSG00000001062	72325	Vps9d1	238.684131858974	-0.289961072739196	0.110241525260852	-2.63023458767551	0.00853259667932399	0.0222469992581986
ENSMUSG00000001065	57247	Zfp276	59.3169309157127	-0.0424375068015113	0.182143323557579	-0.23298963680157	0.815769452984901	0.881687124065236
ENSMUSG00000001076	239659	C1ql4	0	NA	NA	NA	NA	NA
ENSMUSG00000001082	68294	Mfsd10	82.762613878336	1.43479104436366	0.203458008394009	7.05202540656494	1.76331995204625e-12	2.37906561401581e-11
ENSMUSG00000001089	269593	Luzp1	230.206600490547	-0.145098372512531	0.117161310207176	-1.23844955519833	0.215549415627246	0.33579330479932
ENSMUSG00000001095	20500	Slc13a2	0.170888214687542	-0.114350980223481	3.97424740932512	-0.0287729898131578	0.977045642964729	NA
ENSMUSG00000001098	330171	Kctd10	111.204796887749	0.0484262495700694	0.202872644271213	0.238702708016809	0.81133611675619	0.878638699051982
ENSMUSG00000001100	67811	Poldip2	1086.69894664339	-0.508295444017111	0.0735765916137636	-6.9083853012026	4.90201089240867e-12	6.17947677037409e-11
ENSMUSG00000001103	18292	Sebox	0.811802723393335	-1.40054330223892	1.59193350758074	-0.879775000381344	0.378981210200866	0.517100403033835
ENSMUSG00000001105	55978	Ift20	225.182603376682	0.42800416073295	0.1002453328115	4.26956695867091	1.95852848002369e-05	8.9621018324262e-05
ENSMUSG00000001119	12833	Col6a1	2933.68030875654	0.931078673586027	0.148659199443013	6.2631756196356	3.77215376708673e-10	3.6432823901853e-09
ENSMUSG00000001120	59093	Pcbp3	32.2104697682931	0.555849859775207	0.2468117052463	2.25212114320311	0.0243146175169341	0.0551056605901552
ENSMUSG00000001123	16859	Lgals9	266.434641676908	1.21626404812175	0.167087092843965	7.27922203576529	3.35750693779089e-13	4.97993137196843e-12
ENSMUSG00000001127	11836	Araf	831.915627974372	-0.199052496148604	0.0925443179897736	-2.15088835784169	0.0314850126755264	0.0689230452324701
ENSMUSG00000001128	18636	Cfp	239.484763852563	1.55205614443418	0.217756686692891	7.12747869195448	1.02224091846047e-12	1.41714650573643e-11
ENSMUSG00000001131	21857	Timp1	250.701500620966	4.91302717903742	0.403403669167502	12.1789352813185	4.02501972869112e-34	1.19312239222393e-31
ENSMUSG00000001134	22294	Uxt	65.4400226368646	-0.0129043444654677	0.20013912587128	-0.0644768703235324	0.948590523590314	0.968629137994425
ENSMUSG00000001138	94218	Cnnm3	130.925274244038	-0.564479050255892	0.209353570693794	-2.69629530743239	0.0070115476051056	0.0187343272900469
ENSMUSG00000001143	214895	Lman2l	312.897831364869	-0.213956543128124	0.109626006138995	-1.9516951375283	0.0509744102541659	0.103713655747777
ENSMUSG00000001150	54387	Mcm3ap	254.933718756775	-0.329450796988531	0.155722267175565	-2.11563062215823	0.0343762353300943	0.0743239059904227
ENSMUSG00000001151	18541	Pcnt	591.384865162045	-0.751449094715517	0.124820430735039	-6.02024115996402	1.74157397566126e-09	1.52762866089661e-08
ENSMUSG00000001155	14317	Ftcd	1.41335790504242	-0.686497327802298	1.26005557649362	-0.544815118165364	0.5858806798084	0.706315710278518
ENSMUSG00000001156	17119	Mxd1	60.568399917337	0.207650028235304	0.182195758132554	1.13970835744832	0.254407824155137	0.381762279419798
ENSMUSG00000001157	23885	Gmcl1	58.9933897130381	0.354722218015385	0.20225670349274	1.75382181104379	0.0794610445244252	0.149509593435904
ENSMUSG00000001158	66618	Snrnp27	753.534813489634	0.194425228170482	0.143941024661676	1.35072838773703	0.176782455233159	0.287580013730514
ENSMUSG00000001166	114643	Oas1c	6.32043810153154	0.897554491106302	0.556139406116311	1.61390198434992	0.106548688190457	0.190584959433404
ENSMUSG00000001168	246729	Oas1h	0.161516124629939	2.02214666621873	4.28235067947345	0.472204828042568	0.636780593916154	NA
ENSMUSG00000001173	320634	Ocrl	177.132938036123	-0.373735674221751	0.125923074859605	-2.96796813958394	0.00299775401715912	0.00883675456622937
ENSMUSG00000001175	12313	Calm1	6236.16746837695	-0.327315963590953	0.10292335933946	-3.18019121889917	0.00147177898670553	0.00464217256146503
ENSMUSG00000001211	28169	Agpat3	1387.03885672428	-0.299351560286098	0.105333526923481	-2.84193996944165	0.0044839933848194	0.0126410985535391
ENSMUSG00000001225	13487	Slc26a3	0.0579491280617172	0.606966676079468	4.32794324778021	0.140243677268823	0.888467463415622	NA
ENSMUSG00000001227	20359	Sema6b	90.3883221837436	0.69196784666285	0.166250377989888	4.16220314822344	3.15191748275932e-05	0.000138537288922764
ENSMUSG00000001228	18140	Uhrf1	37.7861259482381	2.89625206812525	0.480119484363241	6.032356866263	1.61585447608666e-09	1.42479346782497e-08
ENSMUSG00000001229	224897	Dpp9	533.568995218881	-1.21433871429703	0.121644142979638	-9.98271420680154	1.81434538565783e-23	1.20698877685495e-21
ENSMUSG00000001240	54409	Ramp2	284.599303945412	0.25572343575673	0.150429276130699	1.69995789605839	0.089138845474248	0.164856565577064
ENSMUSG00000001247	54135	Lsr	5.46336730951466	0.646708684068842	0.572522915634781	1.12957694165273	0.258654531654344	0.387146312805867
ENSMUSG00000001248	52857	Gramd1a	479.496243062266	-0.090670357081117	0.108723794421535	-0.833951367899998	0.404308389100674	0.542008792172272
ENSMUSG00000001249	15451	Hpn	86.4128104937866	-0.230009480603712	0.183768572389554	-1.25162576828499	0.210706260460628	0.329905708568035
ENSMUSG00000001260	14405	Gabrg1	0.456540242059635	-1.75672157951032	2.10860538009514	-0.83312012579189	0.404776984081891	NA
ENSMUSG00000001270	12709	Ckb	620.296367404042	2.10342709906221	0.302915169854388	6.94394770678974	3.81291692725678e-12	4.89223211347644e-11
ENSMUSG00000001280	20683	Sp1	215.465315123558	0.171314874837249	0.107446473741524	1.59442063449536	0.110841853792184	0.197005488659647
ENSMUSG00000001281	16421	Itgb7	57.9211361200906	1.72598920863648	0.230802587327297	7.47820563288959	7.53442419461022e-14	1.19489684099731e-12
ENSMUSG00000001285	60315	Myg1	123.224756970765	0.395360050382249	0.150489509893119	2.62716019650169	0.00861007887321346	0.0224247087483115
ENSMUSG00000001288	19411	Rarg	278.398079167298	0.0135628869738729	0.168318327767963	0.0805787887375532	0.935776935476464	0.960706205757009
ENSMUSG00000001289	56612	Pfdn5	889.10800680694	0.436251119567216	0.122218405041868	3.56943882075512	0.00035774674839809	0.00127927595035796
ENSMUSG00000001300	13642	Efnb2	122.327044911017	-0.614146045763463	0.180286372090393	-3.40650288007093	0.000658008562167596	0.00223215728502394
ENSMUSG00000001305	67223	Rrp15	107.259365760184	-0.102801799147227	0.139737138971231	-0.735679862233272	0.461925547756916	0.597780769525947
ENSMUSG00000001313	11858	Rnd2	43.7628153933365	0.464922158338575	0.208070793936086	2.23444217971979	0.025453992988459	0.0573461648226632
ENSMUSG00000001323	27364	Srr	71.4722495392578	-0.676969283762377	0.183208630973786	-3.69507309870811	0.000219823535294809	0.00082268529538386
ENSMUSG00000001333	68828	Sync	219.692489040667	-0.343944365916661	0.273503632676141	-1.25754953435638	0.208554714131412	0.32740166454415
ENSMUSG00000001334	384061	Fndc5	1716.5289327052	-0.735542390001053	0.122274381920519	-6.01550691525206	1.79324646952297e-09	1.56749649116108e-08
ENSMUSG00000001348	11433	Acp5	100.023231683747	1.21245939772272	0.577058616258211	2.10110266715122	0.0356319548306113	0.0767179356462969
ENSMUSG00000001349	12797	Cnn1	44.5511126961937	-0.879961118773198	0.304497500794031	-2.88987960977855	0.00385389387358278	0.0110627939062672
ENSMUSG00000001366	71538	Fbxo9	423.831052882759	-0.499326618489723	0.126443950206594	-3.94899572240414	7.84797539001045e-05	0.000320485494198624
ENSMUSG00000001376	73288	Vps50	262.700578310993	-0.263434190423915	0.11638683178015	-2.26343639048043	0.0236088016170196	0.0537239671108648
ENSMUSG00000001380	15115	Hars	347.249336628755	0.496916758613319	0.094064383814914	5.2827301733149	1.27272776833621e-07	8.41955156755924e-07
ENSMUSG00000001383	66492	Zmat2	757.658173070854	0.267483592516137	0.118342616154373	2.26024741727204	0.0238058994575833	0.0541170086124402
ENSMUSG00000001403	68612	Ube2c	78.9549714877527	2.1585278182154	0.246470113980388	8.75776694933148	1.99156398149597e-18	6.03668498872395e-17
ENSMUSG00000001415	229512	Smg5	696.974841724541	-0.48128458580148	0.105798664150414	-4.54906108376979	5.38858011418259e-06	2.72224584866111e-05
ENSMUSG00000001416	12462	Cct3	1064.11351242304	0.288341404265254	0.0961855512502447	2.99776214324623	0.00271969846380571	0.00808092009654065
ENSMUSG00000001418	56700	Glmp	370.639014195728	0.785088212892304	0.128952045464338	6.08821837657024	1.14174071671206e-09	1.0269552711631e-08
ENSMUSG00000001419	17261	Mef2d	1828.97507317943	-0.645126817520832	0.126186877728212	-5.11247151158095	3.17970951405657e-07	1.97758113776113e-06
ENSMUSG00000001420	71913	Tmem79	19.2248029822106	-0.807104061983163	0.347102059477681	-2.32526439974944	0.0200578266570013	0.0467656943401038
ENSMUSG00000001424	56463	Snd1	636.581525664062	0.479310959270957	0.0856565881108881	5.59572789252892	2.19698049097237e-08	1.62452442246992e-07
ENSMUSG00000001435	12822	Col18a1	365.916904960539	0.581396060324604	0.175841833514563	3.30635804179359	0.000945172293957084	0.00310805781264655
ENSMUSG00000001436	20509	Slc19a1	74.0660226808354	0.258563596476387	0.171247454610604	1.50988285965668	0.131073317042703	0.225700055666306
ENSMUSG00000001440	16211	Kpnb1	809.436102151168	0.078347733296054	0.103675423805177	0.755702078857978	0.449827837396425	0.586000111057955
ENSMUSG00000001441	19155	Npepps	1417.64342361574	-0.123431523929838	0.105249145323641	-1.17275559388427	0.240893830319849	0.366412385885692
ENSMUSG00000001444	57765	Tbx21	12.8838354961882	0.956592227196298	0.382871151656186	2.49847036805558	0.0124730569887831	0.0310264396130701
ENSMUSG00000001445	107732	Mrpl10	287.136813597036	-0.281582419072944	0.106802649989542	-2.63647408655607	0.0083772598437023	0.0218844513568568
ENSMUSG00000001467	13121	Cyp51	108.320638293453	0.270246866836392	0.213470013850267	1.26597109337309	0.205523431563935	0.323575397175212
ENSMUSG00000001472	66855	Tcf25	2024.65903794996	-0.244029572719534	0.0607271857324472	-4.01845680441513	5.85805453912353e-05	0.000244372527618197
ENSMUSG00000001473	67951	Tubb6	1132.76524340014	2.77676680294294	0.299703323805209	9.26505174412977	1.9498276351116e-20	8.17103443678682e-19
ENSMUSG00000001482	23854	Def8	448.03775260511	-0.551484250385087	0.0981227788550319	-5.62034888147489	1.90572222877501e-08	1.42009770666979e-07
ENSMUSG00000001493	17285	Meox1	98.9700929775699	1.29081993145099	0.155227573947826	8.31566131340072	9.12420445881495e-17	2.15359003836455e-15
ENSMUSG00000001494	74499	Sost	0.106749372660218	0.606959920202541	4.32794324778021	0.140242116278639	0.888468696717425	NA
ENSMUSG00000001496	21869	Nkx2-1	0	NA	NA	NA	NA	NA
ENSMUSG00000001497	18511	Pax9	3.18696427126311	-0.444512772280079	0.700861893388038	-0.63423732474776	0.525925952299185	0.6555212354993
ENSMUSG00000001504	16372	Irx2	1.14282769569774	1.22508533552572	1.41686332646354	0.864646090165593	0.387233067029616	0.525513831018378
ENSMUSG00000001506	12842	Col1a1	11896.4986574878	0.495538205213603	0.203817692701766	2.43128159604227	0.0150455160739756	0.0365520630954714
ENSMUSG00000001507	16400	Itga3	96.1513860700877	-0.525460183187969	0.15437702307327	-3.40374605447973	0.000664685175229345	0.00225290562967817
ENSMUSG00000001508	20391	Sgca	1971.49567899464	-0.413009758499608	0.0962144883805538	-4.29259423867687	1.76597557186212e-05	8.14944359020712e-05
ENSMUSG00000001510	13393	Dlx3	0.315901884446719	0	2.88997601862545	0	1	NA
ENSMUSG00000001517	14235	Foxm1	20.6161311674066	3.22620380393044	0.558826907314129	5.77317191012944	7.77930006911276e-09	6.16381098636423e-08
ENSMUSG00000001518	101142	Itfg2	141.503084436209	-0.349178265245106	0.131014385181878	-2.66519027479591	0.00769447733273477	0.0203220099051277
ENSMUSG00000001520	60345	Nrip2	30.1456375000797	-0.282859644291851	0.286278377473263	-0.988058011186223	0.323124238122132	0.458483406154288
ENSMUSG00000001521	22158	Tulp3	133.117937775845	0.286655349345773	0.129198879400597	2.21871389810559	0.0265061948995309	0.0593584457937835
ENSMUSG00000001524	14885	Gtf2h4	172.75634709755	-0.196572246986038	0.111108398719165	-1.76919341158798	0.0768616033092004	0.145283133711886
ENSMUSG00000001525	22154	Tubb5	1272.70609354638	1.9821633594798	0.179684280875491	11.031367628943	2.69731645083804e-28	3.37700668941257e-26
ENSMUSG00000001542	192657	Ell2	210.508594699139	-0.808962637965846	0.137516298068398	-5.88266735891538	4.03706779747785e-09	3.35015132127464e-08
ENSMUSG00000001552	16480	Jup	1426.36837877596	-0.494274774323312	0.123725251499161	-3.99493852980096	6.47110403220364e-05	0.000268170320676663
ENSMUSG00000001555	14230	Fkbp10	199.960250810095	1.72869201281446	0.199236551474793	8.67658067768335	4.0784545366717e-18	1.18457360368432e-16
ENSMUSG00000001558	66720	Klhl10	3.32647475521845	0.828086630732748	0.789128223755979	1.04936891851535	0.294008357610468	0.427184204163065
ENSMUSG00000001566	15285	Mnx1	0	NA	NA	NA	NA	NA
ENSMUSG00000001569	433864	Nom1	185.024806837742	-0.309635409220391	0.106212871580446	-2.91523432718673	0.00355421570761511	0.0102963963809137
ENSMUSG00000001576	67458	Ergic1	467.401022660201	-0.00425261095068674	0.0911409531995095	-0.046659715543875	0.9627844376928	0.977137284327843
ENSMUSG00000001583	83813	Tnk1	0.941254476010116	-0.121070647691158	1.23118882088863	-0.0983363767092791	0.921665193711587	0.952957747481082
ENSMUSG00000001588	216859	Acap1	12.0093353350521	1.34100361018422	0.431314231040051	3.10911051311844	0.00187651514640027	0.00577991784470602
ENSMUSG00000001604	21401	Tcea3	2083.64536214544	-0.775246221022799	0.127258997945164	-6.09187745888784	1.1159409569595e-09	1.0055441157547e-08
ENSMUSG00000001622	12994	Csn3	0	NA	NA	NA	NA	NA
ENSMUSG00000001627	15982	Ifrd1	439.122072390068	-0.671366494875601	0.172465707419912	-3.89275355036806	9.91128252631511e-05	0.000395920970834193
ENSMUSG00000001630	232533	Stk38l	134.532396429612	-0.66546896297506	0.139047450372006	-4.7859127311912	1.70212009568701e-06	9.39732532696879e-06
ENSMUSG00000001632	78783	Brpf1	166.093262931614	-0.145739102516884	0.133063199546615	-1.095262273968	0.273401750269392	0.403644552858722
ENSMUSG00000001642	11677	Akr1b3	1759.25143783207	-0.109411672125766	0.0756985145172028	-1.44536088750991	0.14835654356004	0.249388945754293
ENSMUSG00000001655	15422	Hoxc13	0.109739805881935	0.606959920202541	4.32794324778021	0.140242116278639	0.888468696717425	NA
ENSMUSG00000001656	109663	Hoxc11	79.5832180579872	-0.369905166050435	0.17128566953369	-2.15958034935129	0.0308051710096468	0.0676184070610313
ENSMUSG00000001657	15426	Hoxc8	96.1137523341176	0.244601066441689	0.236963031519819	1.03223302332386	0.3019629683906	0.435508554225052
ENSMUSG00000001661	15425	Hoxc6	145.921730753662	-0.197064781920993	0.12997576620682	-1.51616557202994	0.129477491119047	0.223391062953576
ENSMUSG00000001663	14871	Gstt1	83.8993307496364	0.340131771549637	0.200857860468782	1.69339537300558	0.090380235025713	0.166647859258443
ENSMUSG00000001665	103140	Gstt3	28.4000276166035	0.618749140025905	0.245764565907987	2.51764992133797	0.0118140679217686	0.0296041977994891
ENSMUSG00000001666	13202	Ddt	36.9235334263129	0.498587060045234	0.251917788851476	1.97916575212236	0.0477973474700344	0.0981410953400717
ENSMUSG00000001670	234724	Tat	1.22264323469412	-0.0639743018069287	1.54338059542373	-0.0414507620457446	0.966936545283354	0.979333048756056
ENSMUSG00000001672	73608	Marveld3	0.361029696938437	0.569411289531281	2.27337620025746	0.250469451323893	0.802224326231892	NA
ENSMUSG00000001674	66942	Ddx18	260.29494020756	0.10577531237232	0.138185704016277	0.765457708706687	0.443999040428105	0.580507793858034
ENSMUSG00000001687	24109	Ubl3	1045.5925885417	-0.584506001102958	0.097964770742675	-5.96649179773293	2.42408918228764e-09	2.08457191328379e-08
ENSMUSG00000001700	107022	Gramd3	177.356428552571	-0.498754684093458	0.128404930623602	-3.8842331183954	0.000102653380188567	0.000408929680723507
ENSMUSG00000001707	66143	Eef1e1	166.134068008655	0.341525361602694	0.211005634759725	1.61856038580009	0.105541884312397	0.189186995294351
ENSMUSG00000001729	11651	Akt1	926.1929084222	0.323025292896466	0.118415887196021	2.7278881284041	0.0063741221265062	0.0172321861190968
ENSMUSG00000001739	60363	Cldn15	43.8902129664043	0.403361467086657	0.22322527900913	1.80697037932769	0.0707668977629631	0.136137464994087
ENSMUSG00000001741	16170	Il16	58.0109101947994	1.03215344699052	0.210811990043115	4.89608511726219	9.7764733445711e-07	5.60957509839225e-06
ENSMUSG00000001750	27060	Tcirg1	393.770990012011	2.52536116277728	0.256266837165766	9.85442045762536	6.55940092948053e-23	3.99449681376251e-21
ENSMUSG00000001751	27419	Naglu	134.814965809814	1.04577151946435	0.179755479391959	5.81774487766255	5.96468444490061e-09	4.80344164426135e-08
ENSMUSG00000001755	71743	Coasy	133.135721786139	-0.185894948583145	0.134570151106376	-1.38139808163102	0.16715659541838	0.275163372302842
ENSMUSG00000001761	319757	Smo	123.054126199207	0.443289712598015	0.203931827155623	2.17371520071624	0.0297265303643047	0.0655505603930959
ENSMUSG00000001763	232670	Tspan33	40.0978730301244	0.665925854054485	0.219167180486132	3.03843783808051	0.0023780816140096	0.00714381387385863
ENSMUSG00000001767	66877	Crnkl1	208.873977790465	-0.0391299834052507	0.120231778675348	-0.325454583109098	0.744837050591172	0.831552502285586
ENSMUSG00000001768	74030	Rin2	263.335948303163	0.937741004855011	0.179504553214491	5.22405135726279	1.75050194134873e-07	1.13274053392508e-06
ENSMUSG00000001768	408057	Rin2	263.335948303163	0.937741004855011	0.179504553214491	5.22405135726279	1.75050194134873e-07	1.13274053392508e-06
ENSMUSG00000001773	53320	Folh1	0.564883845913371	-2.42333834385576	1.68049372943515	-1.44203950387265	0.149291229660531	NA
ENSMUSG00000001774	66917	Chordc1	593.280096836707	-0.287491307075179	0.12120508384841	-2.37194099411491	0.0176949163234034	0.0420014635340134
ENSMUSG00000001783	28088	Rtcb	500.539885484877	0.405518846308874	0.107035144264329	3.7886513733043	0.000151467291407535	0.000584330371847213
ENSMUSG00000001785	103136	Pwp1	223.88371869244	-0.253532361038196	0.110437999252025	-2.29569860695884	0.0216931201620116	0.0500020838314085
ENSMUSG00000001786	69754	Fbxo7	89.5000157402108	0.0294388858980681	0.145402783000274	0.202464390918933	0.8395536938439	0.898480690566047
ENSMUSG00000001794	12336	Capns1	2523.54600152576	0.553735640945501	0.080814670972074	6.85191976017383	7.28654268720907e-12	8.99069232028809e-11
ENSMUSG00000001802	435965	Lrp3	121.399468932288	-0.617050794198854	0.133170944285149	-4.63352420838596	3.59492698764167e-06	1.87874079837142e-05
ENSMUSG00000001804	16769	Dsg4	0	NA	NA	NA	NA	NA
ENSMUSG00000001815	14029	Evx2	1.48953978013736	1.60029684966059	1.21692477562523	1.31503350224618	0.188498643264545	0.302513308302821
ENSMUSG00000001819	15433	Hoxd13	0.628517647987305	1.34691831106149	2.15020249173807	0.62641463594098	0.531043012131126	NA
ENSMUSG00000001823	15432	Hoxd12	0	NA	NA	NA	NA	NA
ENSMUSG00000001827	14275	Folr1	5.14792164950842	2.52967681235538	0.764316196768337	3.30972550765154	0.000933875048588655	0.0030783514888637
ENSMUSG00000001829	20480	Clpb	661.142892341343	-0.971558876245251	0.0995368655069761	-9.76079436796369	1.65850991301266e-22	9.41706600467499e-21
ENSMUSG00000001833	235072	Septin7	1005.77408851945	-0.00347320559347861	0.0973093540368737	-0.035692412387842	0.971527620736118	0.982344427316172
ENSMUSG00000001844	72881	Zdhhc4	241.016020122471	-0.0119645046433412	0.118006572955435	-0.101388459504367	0.919242097247182	0.951482127668247
ENSMUSG00000001847	19353	Rac1	1507.28602305748	-0.354433934229886	0.110568647865978	-3.20555547228451	0.00134802060776526	0.00428919516822798
ENSMUSG00000001855	227720	Nup214	109.130571122074	-0.702099477841337	0.20532497287927	-3.41945486706173	0.000627467405569907	0.00213790745335913
ENSMUSG00000001864	108897	Aif1l	167.49724315052	2.92704353821465	0.305047281426371	9.59537657417592	8.36112169101429e-22	4.31036137917583e-20
ENSMUSG00000001865	12873	Cpa3	45.3007559344063	0.240228728924873	0.210581643622842	1.14078665543673	0.253958715157687	0.381306951317206
ENSMUSG00000001870	268977	Ltbp1	227.873769268467	0.12253735863589	0.129308107314307	0.947638637522094	0.343313449362708	0.479588375566979
ENSMUSG00000001891	216558	Ugp2	5429.51709919999	-0.747449530728869	0.09827201874775	-7.60592425243103	2.82874940618587e-14	4.82395108125961e-13
ENSMUSG00000001901	192775	Kcnh6	0.110434231680082	0.606959920202541	4.32794324778021	0.140242116278639	0.888468696717425	NA
ENSMUSG00000001909	212528	Trmt1	408.015500509183	-0.242124031307496	0.0861033760719695	-2.81201553705764	0.00492321251592965	0.0137086883110366
ENSMUSG00000001910	66830	Nacc1	407.096369498027	-0.262566708363262	0.135047610801529	-1.9442528957372	0.051864961911489	0.105196421538527
ENSMUSG00000001911	18032	Nfix	3890.84906895761	-0.418462534788236	0.0786281470078619	-5.32204497641785	1.02607193968979e-07	6.90338187193831e-07
ENSMUSG00000001918	20514	Slc1a5	465.662933195496	-0.288899505867992	0.205683801089665	-1.40458074159204	0.160145986660186	0.265682834394835
ENSMUSG00000001924	22201	Uba1	2044.83102670581	-0.2067718640475	0.0846889613120562	-2.44154445684604	0.0146245875667713	0.0356885970439962
ENSMUSG00000001930	22371	Vwf	336.815399449857	-0.900384817755897	0.138519684460094	-6.50004958692561	8.02935409223315e-11	8.531770713608e-10
ENSMUSG00000001942	22619	Siae	92.7052705975524	-0.217229180912553	0.142386497132519	-1.52563048664915	0.127101915189016	0.219997554992284
ENSMUSG00000001943	57276	Vsig2	40.7698114474335	-0.549077000071987	0.232822000556625	-2.3583553047361	0.018356114334503	0.0433310922403767
ENSMUSG00000001946	69524	Esam	416.513086155745	0.0307355914362314	0.109227515555549	0.281390556948085	0.778410860108144	0.856137267812509
ENSMUSG00000001948	20686	Spa17	25.6663217434181	-0.274275837407345	0.346752786737008	-0.790983801423253	0.428953444164322	0.565938903915449
ENSMUSG00000001962	108160	Fam50a	192.615692521719	-0.119567021482691	0.122285645342202	-0.977768250297051	0.328188957332645	0.464073983849332
ENSMUSG00000001964	13726	Emd	260.865617180095	-0.132256388950649	0.117339290228654	-1.12712790995179	0.259688404545778	0.388330468521266
ENSMUSG00000001983	70207	Taco1	337.9886259063	-0.862127443216599	0.110173089051302	-7.82520895656424	5.06814395821988e-15	9.45037722163165e-14
ENSMUSG00000001985	14807	Grik3	2.01018498001441	-0.491123239153028	0.873713721387978	-0.562110022002209	0.574041060499616	0.696373715484519
ENSMUSG00000001986	53623	Gria3	24.1358445071588	0.218180796455198	0.28412329101767	0.76790887390372	0.442541325033824	0.579434495687814
ENSMUSG00000001988	18142	Npas1	3.32714999697067	-0.680168326158305	0.720821892985535	-0.943601093109354	0.345373533446199	0.481778153195504
ENSMUSG00000001995	244668	Sipa1l2	128.787448325589	-0.096702417460191	0.131704257917991	-0.734239112606407	0.462803019466333	0.598570450008526
ENSMUSG00000001998	108011	Ap4e1	69.739557277832	-0.608784700765203	0.182924055628279	-3.3280734929818	0.00087448793662778	0.00289918640437601
ENSMUSG00000001999	109778	Blvra	153.035047601513	0.689392745707003	0.13796674900815	4.9968035824797	5.82883835919433e-07	3.4607332785355e-06
ENSMUSG00000002006	245469	Pdzd4	28.3235898372944	0.452922864421025	0.260810852213092	1.73659516303781	0.082458653906074	0.154271309335876
ENSMUSG00000002007	56504	Srpk3	548.91732294645	0.392934451564538	0.0937314318721986	4.19213111030138	2.76346203170861e-05	0.000122937771293645
ENSMUSG00000002010	15929	Idh3g	3478.79483791386	-0.478771613731191	0.0926087098658524	-5.16983353320342	2.34302610782054e-07	1.48844554854518e-06
ENSMUSG00000002012	93843	Pnck	125.798057495316	0.255229981972776	0.167074983412521	1.52763733241016	0.126602607349146	0.219275541874612
ENSMUSG00000002014	20832	Ssr4	573.59314160032	0.223872011822357	0.0757667539767129	2.95475258041495	0.00312919891492475	0.00918259754376739
ENSMUSG00000002015	27061	Bcap31	637.587802945423	0.559913575587274	0.114919347884442	4.87223070696762	1.10345205642925e-06	6.27426885795329e-06
ENSMUSG00000002017	72722	Fam98a	473.247173708903	-0.279663494717701	0.0857277156960677	-3.2622296353865	0.0011053955971202	0.00357992594009509
ENSMUSG00000002020	16997	Ltbp2	89.6646110560111	2.79709321666453	0.513046819330905	5.45192585018339	4.9827233326555e-08	3.51669307480172e-07
ENSMUSG00000002028	214162	Kmt2a	290.361718063633	-0.0833081496234477	0.129062397211686	-0.645487387676573	0.518611388967209	0.649012837115046
ENSMUSG00000002031	76568	Ift46	158.70511098473	0.266118221342019	0.132107407253812	2.01440802506054	0.0439667125014922	0.0915912591869138
ENSMUSG00000002032	71687	Tmem25	140.45617367196	-0.0876554074237515	0.141714247524087	-0.618536307782694	0.536221871978892	0.664369308099978
ENSMUSG00000002033	12502	Cd3g	2.25562815393878	2.35198898898556	1.38010817351637	1.70420626014622	0.088342560092785	0.16365416632573
ENSMUSG00000002043	67091	Trappc6a	50.5345095448233	1.26584023181286	0.205050776336283	6.17330133750331	6.68785704675061e-10	6.24685516642039e-09
ENSMUSG00000002052	20926	Supt6	547.038671339915	-0.563172694525063	0.132124065228219	-4.26245357764528	2.02194511642332e-05	9.22506738608983e-05
ENSMUSG00000002055	54141	Spag5	50.4834101781997	0.53776196870566	0.236813448971628	2.27082528902355	0.023157556405303	0.0528517736029995
ENSMUSG00000002057	15218	Foxn1	0.167044665709091	1.38415153064863	4.32043677041403	0.320373055827868	0.748685548345781	NA
ENSMUSG00000002058	22248	Unc119	106.912249277551	0.62110519910291	0.146828902757414	4.23012899666681	2.33557342313196e-05	0.000105390986098211
ENSMUSG00000002059	19376	Rab34	106.059483425382	0.961986957633735	0.197507321567731	4.87063947806026	1.11237644920085e-06	6.319665187864e-06
ENSMUSG00000002064	20316	Sdf2	430.907131020625	0.34055561267857	0.126801519261369	2.6857376367597	0.00723698911849938	0.0192683868234289
ENSMUSG00000002068	12447	Ccne1	15.0240838070928	3.22358568427925	0.530712067157933	6.07407647906366	1.24703289285648e-09	1.11568761745708e-08
ENSMUSG00000002076	74377	Hsf2bp	6.73656385450893	2.40853740548471	0.651056881528308	3.69942699911388	0.000216086782267849	0.000809984631593026
ENSMUSG00000002083	170770	Bbc3	43.9851717469172	1.00406251343093	0.250980888457083	4.00055366607178	6.31944531424998e-05	0.000262208849731035
ENSMUSG00000002100	17868	Mybpc3	0.812147723756262	2.56827880459318	1.50831589181311	1.70274596888714	0.0886156181857538	0.164085375065502
ENSMUSG00000002102	19182	Psmc3	2584.40003397521	0.250463333106332	0.0841354750097795	2.97690520053782	0.00291174028963077	0.00860333465524587
ENSMUSG00000002103	11432	Acp2	295.211065672026	0.543891169696396	0.132266099411764	4.11209805169487	3.92079703582524e-05	0.000168979058907696
ENSMUSG00000002104	19400	Rapsn	387.815179956717	0.301906541401961	0.111319347909886	2.71207608623756	0.00668632432785782	0.0179558006230522
ENSMUSG00000002105	68427	Slc39a13	332.267359433669	0.177302636175266	0.0889099692891573	1.99418172779516	0.0461321982562216	0.0953534372693457
ENSMUSG00000002107	14007	Celf2	1036.18411595784	0.425673080952393	0.0989767271572181	4.30073910482248	1.70229382705036e-05	7.88264109162739e-05
ENSMUSG00000002108	22259	Nr1h3	181.267573004752	-0.228650328913324	0.134283463990136	-1.70274374907486	0.0886160337829568	0.164085375065502
ENSMUSG00000002109	107986	Ddb2	24.5776276015078	0.117859719514558	0.28731728002471	0.410207556971242	0.681653697842005	0.783625732143339
ENSMUSG00000002111	20375	Spi1	203.253521657451	3.51524992068965	0.310432491260362	11.3237177797262	1.00133341950548e-29	1.60189505848983e-27
ENSMUSG00000002129	67465	Sf3a1	263.726772260183	-0.000179744318656659	0.0987837549559018	-0.00181957366104274	0.99854819106973	0.999093412458679
ENSMUSG00000002147	20852	Stat6	416.697200031792	0.295557449045882	0.0942357719289961	3.13636152170087	0.00171058197784784	0.0053185563670336
ENSMUSG00000002190	12745	Clgn	0.320082212542322	-0.12144228623979	2.58918995185641	-0.0469035831661241	0.962590072285573	NA
ENSMUSG00000002204	16541	Napsa	24.3619990213891	3.2080156404084	0.414219734540652	7.74471946385154	9.57931068587691e-15	1.73642235157573e-13
ENSMUSG00000002205	101568	Vrk3	196.273564846841	-0.116612765169282	0.112766576886947	-1.03410752005172	0.301085901078023	0.434741297136799
ENSMUSG00000002210	71997	Smg9	208.772394474575	0.178985964295612	0.11144112039278	1.60610341734511	0.108251189167563	0.193150324869484
ENSMUSG00000002221	55982	Paxip1	108.943766554254	-0.148638130417734	0.137536350446355	-1.08071887857537	0.279822182782416	0.411016231024205
ENSMUSG00000002222	68477	Rmnd5a	1463.17920821255	-1.17284462447233	0.1339645736719	-8.75488640261575	2.04309161123075e-18	6.18357321435108e-17
ENSMUSG00000002227	17454	Mov10	64.8344054224512	1.6399940788488	0.264615478744904	6.19764983752061	5.73124693032395e-10	5.40340244969784e-09
ENSMUSG00000002228	71887	Ppm1j	536.091966453524	-0.30786122524218	0.085840528807917	-3.58643206789968	0.00033523334282696	0.00120622964858319
ENSMUSG00000002233	11853	Rhoc	668.040181468303	1.3706375769079	0.151127469013904	9.06941395797349	1.19658857447117e-19	4.45011732391429e-18
ENSMUSG00000002240	73779	Prr27	0	NA	NA	NA	NA	NA
ENSMUSG00000002249	21678	Tead3	137.326951070188	0.449958121792635	0.142567114895289	3.15611438250058	0.00159886146899095	0.0050074969904367
ENSMUSG00000002250	19015	Ppard	358.17996864543	-0.892769534696381	0.136445392644068	-6.54305372571475	6.02751638769235e-11	6.53207784014595e-10
ENSMUSG00000002250	69050	Ppard	358.17996864543	-0.892769534696381	0.136445392644068	-6.54305372571475	6.02751638769235e-11	6.53207784014595e-10
ENSMUSG00000002257	23853	Def6	39.8753685063722	2.14822633923195	0.26227009083717	8.1908933358538	2.59294311915954e-16	5.80088284715859e-15
ENSMUSG00000002265	18616	Peg3	716.767663180844	2.23646721585265	0.19668796229118	11.3706359545367	5.85593611776539e-30	9.67525445293418e-28
ENSMUSG00000002266	22776	Zim1	122.44712647454	1.47386734784485	0.236002289032352	6.2451400530391	4.23420542842311e-10	4.0700466771924e-09
ENSMUSG00000002274	70083	Metrn	17.7042205541191	-0.910385357244666	0.377264497804099	-2.41312225916736	0.0158165131381421	0.0382004594085183
ENSMUSG00000002279	76483	Lmf1	189.811953077629	-0.0721730571878527	0.146629195930091	-0.49221477844196	0.622567518198673	0.737106894568525
ENSMUSG00000002280	67563	Ciao3	393.711392674824	-0.476241298595649	0.106649375357938	-4.46548605650323	7.98871754058721e-06	3.92083222463152e-05
ENSMUSG00000002289	57875	Angptl4	250.122151496087	1.12258672674499	0.755104879701585	1.48666331912546	0.137103755215976	0.234386180607994
ENSMUSG00000002297	27214	Dbf4	22.3447227977304	2.51018725782741	0.399570821053931	6.28220862375884	3.33796490410168e-10	3.2504037957477e-09
ENSMUSG00000002307	13163	Daxx	180.193963139344	0.152528191274264	0.126832722158538	1.20259337400019	0.229133713031551	0.352380274172348
ENSMUSG00000002308	54219	Cd320	171.663671293323	-0.0161279479579377	0.14091273782661	-0.114453442653161	0.908878351176547	0.945482231961917
ENSMUSG00000002319	75751	Ipo4	286.762355972619	0.0560707153560648	0.106217547248539	0.527885615969504	0.597578728795588	0.716348167489306
ENSMUSG00000002320	74140	Tm9sf1	190.667277899077	0.268641730544259	0.124759912540403	2.1532696286338	0.0312974942557838	0.0686019564717088
ENSMUSG00000002324	56739	Rec8	7.51900204154279	3.48874394538313	0.823379778091778	4.23710180673669	2.26423486122558e-05	0.000102447097862456
ENSMUSG00000002325	16391	Irf9	169.227684280545	0.940819570491426	0.144733539222547	6.50035627916753	8.01300102884376e-11	8.52338056667038e-10
ENSMUSG00000002326	105446	Gmpr2	10.3818342551962	0.802048673887904	0.40012961635293	2.00447215379445	0.0450195069151836	0.0933791110196909
ENSMUSG00000002329	67881	Mdp1	265.15506250438	0.230722359653598	0.0983060564468474	2.34698011488587	0.0189262648310301	0.0444634872026893
ENSMUSG00000002332	52585	Dhrs1	415.189481911682	0.323769271768356	0.106636493532132	3.03619578105124	0.00239583742264421	0.00719179373465963
ENSMUSG00000002341	13004	Ncan	0.840168362143571	-2.83807476568849	2.04208769150423	-1.38979083880474	0.164592400812036	0.271621749053517
ENSMUSG00000002342	234371	Tmem161a	662.052197329664	-0.224514285261514	0.082004164153179	-2.73784005458716	0.00618441457814582	0.0167868630018429
ENSMUSG00000002343	76813	Armc6	128.830108002824	0.0268595478589509	0.135837606015033	0.197732782893555	0.843254139046498	0.901292416393248
ENSMUSG00000002345	72368	Borcs8	72.0248682178552	0.114085931734757	0.170610130037202	0.668693773985639	0.503690839915304	0.635549061669658
ENSMUSG00000002346	73095	Slc25a42	362.362208872668	-1.02606996584456	0.142655194842963	-7.19265756129016	6.35421717803912e-13	9.10966967693703e-12
ENSMUSG00000002365	66616	Snx9	400.060939375609	-0.0106164562090636	0.0936975802996054	-0.113305553623868	0.909788314441894	0.946215523151812
ENSMUSG00000002372	71810	Ranbp3	579.162070370743	-0.141656392692301	0.0848411303244481	-1.66966649490148	0.0949853662809032	0.173502784535498
ENSMUSG00000002379	69875	Ndufa11	603.758705746751	-0.0841894160990189	0.138555751576825	-0.607621229295116	0.543438717446868	0.670385203646054
ENSMUSG00000002384	12164	Bmp8b	0.356158208472467	2.27238013190306	2.76860406055694	0.82076746338584	0.411778734915005	NA
ENSMUSG00000002393	13864	Nr2f6	165.370865533273	-0.0992174126584974	0.120489357795336	-0.823453742919176	0.410250011846533	0.548042248577809
ENSMUSG00000002395	67023	Use1	694.807624602633	0.164599859607924	0.100085849178507	1.64458673188009	0.100055064873494	0.181188567303479
ENSMUSG00000002396	77090	Ocel1	82.6968201879307	0.0935649988727645	0.15892547714698	0.588735050870619	0.556039021109386	0.681766893697559
ENSMUSG00000002409	13549	Dyrk1b	596.038049992782	-0.440233162924691	0.0896109897472727	-4.91271398928042	8.9824261772952e-07	5.18941715264372e-06
ENSMUSG00000002413	109880	Braf	92.507833914449	-0.110731227004534	0.156727237835951	-0.706521907317978	0.47986363392795	0.614877988587261
ENSMUSG00000002416	68198	Ndufb2	43.3002024466354	-0.13726991504686	0.248174341341188	-0.553118885316765	0.580182005666171	0.701627591085493
ENSMUSG00000002428	20585	Hltf	103.716804044493	0.524832808382152	0.153703619100075	3.41457677740456	0.000638811866786477	0.00217288741120739
ENSMUSG00000002455	68879	Prpf6	497.883442607424	-0.0658782163353154	0.0855366283944803	-0.770175509274183	0.441195789460007	0.578267997148408
ENSMUSG00000002458	56470	Rgs19	70.4666880709207	1.51043096045824	0.197524542241396	7.64680147245871	2.06040054638546e-14	3.58648478527562e-13
ENSMUSG00000002459	58175	Rgs20	1.06954767372699	1.55864363699619	1.26353231502512	1.23356056545748	0.217366695128962	0.337919209757403
ENSMUSG00000002475	106861	Abhd3	8.08817839684218	0.128496160730455	0.540561143643574	0.237708836902973	0.81210692925179	0.879142823465539
ENSMUSG00000002477	20641	Snrpd1	171.351320217369	0.94924131149922	0.18179641431058	5.22145233226405	1.77525328192798e-07	1.14728375773717e-06
ENSMUSG00000002486	77832	Tchp	56.4362951589472	0.259129656015477	0.216427498208963	1.19730467782465	0.231187821818252	0.354916445117327
ENSMUSG00000002489	21844	Tiam1	93.1804432377401	-2.21019395510825	0.169141348124969	-13.0671416516987	5.07363666819905e-39	2.92197983773966e-36
ENSMUSG00000002496	22084	Tsc2	865.52560890575	-0.964140884276546	0.136230635993649	-7.07726920045718	1.4702276444376e-12	2.00239044790059e-11
ENSMUSG00000002500	66211	Rpl3l	6254.4440270898	-0.674008000937838	0.106781437179042	-6.31203342775506	2.75392720927731e-10	2.72245761438954e-09
ENSMUSG00000002504	65962	Slc9a3r2	591.520185575234	-0.94722406473031	0.147648731834524	-6.41538909925688	1.40463636739459e-10	1.44326717626393e-09
ENSMUSG00000002524	67959	Puf60	814.376391381915	0.166748497643291	0.0877953103947833	1.89928706776574	0.0575267422778919	0.114717703214827
ENSMUSG00000002546	99412	Golga2	688.975707783001	-0.518678193402015	0.10739569495093	-4.82959948849906	1.36807946818841e-06	7.66862565079916e-06
ENSMUSG00000002550	22245	Uck1	151.322978603192	-0.54518283302139	0.178799283381359	-3.04913321077791	0.00229502692057638	0.00692113369809367
ENSMUSG00000002565	20259	Scin	19.1988841865683	0.12506060985608	0.340455080338269	0.367333657444096	0.713370151219275	0.807831580793647
ENSMUSG00000002578	22781	Ikzf4	17.153845978787	-0.720063300409453	0.406744486038341	-1.77030869532569	0.076675730338523	0.145026996005781
ENSMUSG00000002580	103742	Mien1	48.0321247602263	0.0238590203520907	0.211728447216002	0.112686890523265	0.91027879489098	0.946317214815016
ENSMUSG00000002588	18979	Pon1	23.8929962484847	-0.775906177553099	0.552235803699639	-1.40502693297864	0.160013269569796	0.26550769465907
ENSMUSG00000002602	26362	Axl	843.18033896655	0.635639499052109	0.0923569990351132	6.88241828657128	5.88449211234048e-12	7.33088427122664e-11
ENSMUSG00000002603	21803	Tgfb1	420.342407858143	2.02582542806414	0.20688881113034	9.79185591040914	1.22035017673172e-22	7.13002855431343e-21
ENSMUSG00000002608	52132	Ccdc97	567.027179165886	-0.274576930956245	0.084022730581048	-3.26788868985148	0.00108352970529087	0.00351872213139166
ENSMUSG00000002617	22700	Zfp40	23.0472006952075	0.753146912514121	0.30897236864518	2.43758662244333	0.014785671274662	0.0360188723625117
ENSMUSG00000002625	54194	Akap8l	351.011843614887	-0.193873845765697	0.139791333972057	-1.38688028976425	0.165478269003354	0.272779315366422
ENSMUSG00000002633	20423	Shh	0.183919126333062	0.606964636520221	3.88168028037809	0.156366468301995	0.875744166441497	NA
ENSMUSG00000002635	68079	Pdcd2l	147.502521588814	-0.359389940989982	0.131030593039901	-2.74279412656357	0.00609188655381739	0.0165736478965174
ENSMUSG00000002658	98053	Gtf2f1	322.781763634595	0.203540349699738	0.113369040558225	1.79537860334279	0.0725933991337856	0.138856058677141
ENSMUSG00000002660	53895	Clpp	440.273713274735	-0.270411184035728	0.137788238798118	-1.9625128123738	0.0497028104206442	0.101505526813468
ENSMUSG00000002661	66400	Alkbh7	313.473577671787	-0.149638263615615	0.126949586881826	-1.17872194223766	0.23850891536996	0.363470492712806
ENSMUSG00000002664	19197	Pspn	2.17075180926786	0.960301177948746	0.998952451828642	0.9613081945901	0.336397228848027	0.472362169410636
ENSMUSG00000002668	70785	Dennd1c	34.4089517926574	1.85473468419055	0.31177447245748	5.94896262535893	2.6984724163834e-09	2.29603666091347e-08
ENSMUSG00000002679	69792	Med6	105.400120836845	0.206912346412829	0.140641788171242	1.4712010498679	0.141236753357377	0.240002464797221
ENSMUSG00000002688	18760	Prkd1	34.6928529021026	-0.549047575239971	0.249654732130632	-2.19922759145892	0.0278617433672181	0.0619399096782857
ENSMUSG00000002699	16822	Lcp2	51.7513546812607	3.0397834527602	0.314514564990728	9.66500057906638	4.24617517495901e-22	2.26428976194838e-20
ENSMUSG00000002718	110750	Cse1l	625.151473756705	-0.382532167624946	0.0847129836880597	-4.51562618823051	6.31299404790846e-06	3.15055758909856e-05
ENSMUSG00000002728	67877	Naa20	408.107916875367	-0.265127985959037	0.113320645592402	-2.33962650471181	0.0193030330585432	0.0451762715401403
ENSMUSG00000002731	23992	Prkra	84.2841810463096	0.911473417633991	0.198338982466065	4.59553339591193	4.31643650015306e-06	2.21906372271776e-05
ENSMUSG00000002732	14231	Fkbp7	132.66157571634	1.07967327857108	0.18098737850908	5.96546172150294	2.43943233772477e-09	2.0945011270862e-08
ENSMUSG00000002733	83435	Plekha3	139.858267385749	-0.235584368289589	0.161691620589983	-1.45699800292672	0.145116931488541	0.245272680531152
ENSMUSG00000002741	56418	Ykt6	762.014687706674	-0.108355213967317	0.090826366742409	-1.19299293645226	0.232872139418606	0.356874470488107
ENSMUSG00000002748	22385	Baz1b	627.98356784483	-0.461411139440093	0.0820241721636452	-5.62530687319268	1.85178478947973e-08	1.3845113502056e-07
ENSMUSG00000002763	224824	Pex6	444.958856495477	-0.542140809863884	0.136241333389676	-3.97926823215432	6.91277133554662e-05	0.000285066963606001
ENSMUSG00000002767	27398	Mrpl2	960.161863627228	-0.300058685999551	0.12482055078039	-2.40392054131755	0.0162202984723125	0.0390344503708696
ENSMUSG00000002768	17256	Mea1	220.515401754958	0.29937312745371	0.12387384862641	2.41675810329092	0.0156594198448859	0.037883692488402
ENSMUSG00000002769	14711	Gnmt	22.1749716410923	-0.768712360199614	0.450456150488619	-1.70651984519642	0.0879113346284287	0.163020126228633
ENSMUSG00000002771	14814	Grin2d	12.8141410181009	0.526918829300667	0.441468799560824	1.19355847984014	0.232650723656066	0.356604049392564
ENSMUSG00000002778	68137	Kdelr1	620.438624263807	0.559739732278159	0.107340897235214	5.21459897108566	1.84215328347117e-07	1.18861343581717e-06
ENSMUSG00000002781	70209	Tmem143	693.761348057112	-0.822776658900051	0.0980237538049015	-8.39364569263119	4.71294997189243e-17	1.15852356809068e-15
ENSMUSG00000002791	NA	Pdxk-ps	0.693751319023637	-0.114346159084012	1.89477387672509	-0.0603481821702371	0.951878328022757	NA
ENSMUSG00000002797	110175	Ggct	112.216238035022	-0.671366496432694	0.203018694694382	-3.30691957922077	0.000943279683455286	0.00310427568643399
ENSMUSG00000002799	16450	Jag2	449.761925786158	-0.467528262110856	0.110667759806767	-4.22461124113465	2.39353600277701e-05	0.000107901367905021
ENSMUSG00000002803	399566	Btbd6	188.775334180762	-0.503763879419516	0.130252936455487	-3.86758174616412	0.000109919986227579	0.000435210599565763
ENSMUSG00000002804	66174	Nudt14	107.262145131431	1.13289635374742	0.164313055528299	6.8947433915396	5.39621211125184e-12	6.76018940500332e-11
ENSMUSG00000002808	105298	Epdr1	1360.77487143691	-0.575510273218516	0.118409174971812	-4.86035202386572	1.17177203112586e-06	6.63280225537881e-06
ENSMUSG00000002812	14248	Flii	1008.2001107369	-0.513840868937037	0.14019007702188	-3.66531554766775	0.000247033805184622	0.000915341987335741
ENSMUSG00000002814	21975	Top3a	57.9903211254273	0.121993268700601	0.257604663057942	0.473567781159154	0.635808155359572	0.747767371934353
ENSMUSG00000002820	235040	Atg4d	556.334122442145	-0.689752562833533	0.118143450730545	-5.83826321787978	5.27477784853077e-09	4.28551781913885e-08
ENSMUSG00000002825	60507	Qtrt1	75.1889176548812	0.388393073098117	0.205126924606131	1.89342805116334	0.0583009679656007	0.116028540790103
ENSMUSG00000002831	57435	Plin4	1386.42854454285	-1.62554551953767	0.194958032292196	-8.33792534949963	7.56052769883791e-17	1.80352138255001e-15
ENSMUSG00000002833	15193	Hdgfl2	416.100067164355	-0.0580080024761023	0.0909416284746685	-0.637859728806817	0.523564994537994	0.653467467176616
ENSMUSG00000002835	27221	Chaf1a	22.5806469218484	1.05903550487962	0.32829831511078	3.22583289689519	0.00125606668800278	0.00402009149413657
ENSMUSG00000002844	11544	Adprh	550.203355894634	0.30225682864845	0.0898220914117006	3.3650611324897	0.000765267016007179	0.00256279901007754
ENSMUSG00000002845	67846	Tmem39a	112.867836039538	0.321750481056128	0.136112543252578	2.36385621315641	0.0180858304750969	0.0427888232295324
ENSMUSG00000002846	76916	Timmdc1	427.134293978638	-0.422137291073905	0.108989987802649	-3.87317495473328	0.000107426651737189	0.000426008069853733
ENSMUSG00000002847	85031	Pla1a	96.6742455434583	-0.307811818190311	0.20952940847529	-1.46906260285945	0.141815809954609	0.240824033804132
ENSMUSG00000002870	17216	Mcm2	124.898334272773	0.447837127093024	0.144491173802477	3.09940818741792	0.00193907666457323	0.00595278226131625
ENSMUSG00000002871	24100	Tpra1	369.916155069748	0.171434765801383	0.143882927966817	1.19148788688065	0.233462109131861	0.357482204023922
ENSMUSG00000002881	17936	Nab1	189.225774132481	0.163502216562597	0.161402195878112	1.01301110355445	0.311054857339844	0.445608841496669
ENSMUSG00000002885	26364	Adgre5	269.091971651884	0.572663384514549	0.14513284863893	3.94578753111404	7.95381209164487e-05	0.0003244788308668
ENSMUSG00000002897	16172	Il17ra	83.3465921642929	1.6039660267397	0.201476767051366	7.96104707363492	1.70589466736515e-15	3.36126283578487e-14
ENSMUSG00000002900	16777	Lamb1	806.799544553236	0.613218024518233	0.156511670724943	3.9180338544588	8.92741702553693e-05	0.000359899889967496
ENSMUSG00000002908	84036	Kcnn1	219.773293386132	-1.05031263503856	0.121005573494426	-8.67986989943848	3.96221794135848e-18	1.15413911913241e-16
ENSMUSG00000002910	70807	Arrdc2	288.54240818855	-1.85889007766948	0.561982504401355	-3.30773656316871	0.000940532382701399	0.00309624550679603
ENSMUSG00000002930	19051	Ppp1r17	0	NA	NA	NA	NA	NA
ENSMUSG00000002944	12491	Cd36	2956.7139123227	-0.713188308161611	0.0849416489426898	-8.39621454303059	4.61102805773441e-17	1.14042322159205e-15
ENSMUSG00000002948	26400	Map2k7	636.64851387101	-0.486554149453625	0.0959347529945154	-5.07171941623117	3.94237365832539e-07	2.41600614933899e-06
ENSMUSG00000002949	21856	Timm44	884.935274101974	-0.226427624934976	0.080330678667639	-2.81869428580083	0.00482194194889143	0.0134694961008598
ENSMUSG00000002957	11772	Ap2a2	942.690940362763	-0.134284831683035	0.0776367288024477	-1.72965597281581	0.0836917592226152	0.156302676795169
ENSMUSG00000002963	59047	Pnkp	339.972870534532	0.119114966325153	0.106084442858342	1.12283161522761	0.261509015397639	0.390317454525747
ENSMUSG00000002968	75613	Med25	811.371984594767	-0.541631721122583	0.110309077469906	-4.91012828269143	9.10168316971356e-07	5.25379804272383e-06
ENSMUSG00000002980	57278	Bcam	984.846770956834	0.521782975968767	0.095403329278175	5.46923236239862	4.51988872408432e-08	3.21139926018215e-07
ENSMUSG00000002981	56457	Clptm1	881.034622856899	-0.175643249996861	0.077442392075693	-2.26805042159836	0.0233261336617043	0.0531943518745303
ENSMUSG00000002983	19698	Relb	151.536005779354	0.599007442322924	0.124477872963361	4.81216000934748	1.49307735160302e-06	8.31839695308514e-06
ENSMUSG00000002984	53333	Tomm40	423.309199801343	0.176017319477641	0.120036138693301	1.46636939003324	0.142547680752061	0.241822386880936
ENSMUSG00000002985	11816	Apoe	9994.88379193509	2.83402566473824	0.367080789495442	7.72044123756423	1.15927688167316e-14	2.08452668188098e-13
ENSMUSG00000002992	11813	Apoc2	0	NA	NA	NA	NA	NA
ENSMUSG00000002996	73389	Hbp1	179.404203391435	-0.660636765139398	0.173268735010046	-3.81278691219795	0.000137408574307484	0.000534699735968332
ENSMUSG00000002997	19088	Prkar2b	74.1836894902972	-1.02294852083613	0.596645941783647	-1.71449841388022	0.0864372281236794	0.160745014050097
ENSMUSG00000003031	12576	Cdkn1b	524.773195460085	-0.0537996940742479	0.161820788479416	-0.332464664026102	0.739538417666883	0.827841128802651
ENSMUSG00000003032	16600	Klf4	415.875941275644	-0.424924964377408	0.245834122604583	-1.72850278014858	0.0838981230203464	0.156630032946293
ENSMUSG00000003033	11767	Ap1m1	257.85413390308	-0.157619443508713	0.136644960326105	-1.15349620748948	0.248706773316577	0.375266294613538
ENSMUSG00000003037	17274	Rab8a	230.501305366637	0.8598156141507	0.109601390541029	7.84493344387659	4.33183170665622e-15	8.15282275546866e-14
ENSMUSG00000003038	15331	Hmgn2	529.83505394987	1.26421598482153	0.13296105359468	9.50816762234284	1.94050401296587e-21	9.51696822125377e-20
ENSMUSG00000003039	67922	Fam32a	218.094559560145	0.598564715642216	0.129694179163623	4.61520107920237	3.92714903676281e-06	2.03861815951656e-05
ENSMUSG00000003051	13710	Elf3	4.08571960777196	-0.996738839421238	0.680120078882457	-1.46553361732686	0.142775387468389	0.242066068231164
ENSMUSG00000003053	13095	Cyp2c29	0.299475285015816	-1.45099097564843	2.94735944099887	-0.492302009542712	0.622505859740847	NA
ENSMUSG00000003062	76205	Stard3nl	87.104236891935	0.973391529106463	0.180620866454624	5.38914217505982	7.07947844732785e-08	4.8803367668532e-07
ENSMUSG00000003068	20869	Stk11	1427.9987232715	-0.582192901741963	0.102953690425727	-5.65490075522807	1.55936349356758e-08	1.17811431558627e-07
ENSMUSG00000003070	13637	Efna2	16.44346983291	1.55885079897462	0.359202531392637	4.33975449151462	1.42641988012042e-05	6.68817784792896e-05
ENSMUSG00000003072	66043	Atp5d	5588.35851963327	-0.216323321448952	0.113729537791031	-1.90208564679502	0.0571599585916982	0.114065269313222
ENSMUSG00000003099	19060	Ppp5c	731.527335406222	-0.616992916268873	0.0933210826551526	-6.61150619682408	3.80429191442451e-11	4.25308442146727e-10
ENSMUSG00000003119	69131	Cdk12	89.2744076023122	-0.261658115999822	0.187005587605072	-1.39919945361421	0.161753180394175	0.26782149311692
ENSMUSG00000003123	16890	Lipe	375.969399436022	-0.681869976005297	0.359805257412491	-1.89510842867863	0.0580780382314928	0.115634039572521
ENSMUSG00000003131	18475	Pafah1b2	292.008721481394	0.556614906732815	0.131038180360739	4.24773073924328	2.15946711359052e-05	9.81849841053287e-05
ENSMUSG00000003134	54610	Tbc1d8	152.067280872957	0.319571492917963	0.131586495937211	2.4286040192943	0.015157076519259	0.0367964821629174
ENSMUSG00000003135	52846	Cnot11	363.855717006459	-0.210009294707533	0.110431830215616	-1.90170980864389	0.0572091028382609	0.114140738979593
ENSMUSG00000003153	20527	Slc2a3	48.713471287293	-0.682639120243123	0.203246327667171	-3.35867874257974	0.000783160547792809	0.00261761701179364
ENSMUSG00000003154	60611	Foxj2	373.934799375575	-0.644257534584417	0.108812899246218	-5.92078272932158	3.204129381511e-09	2.68994735289951e-08
ENSMUSG00000003161	109552	Sri	254.297528373853	0.746591774551466	0.127236167619291	5.86776376969617	4.41711967967258e-09	3.63857300298979e-08
ENSMUSG00000003166	13356	Dgcr2	245.040024845825	0.116614427556327	0.103783249329236	1.12363438522132	0.261168162599472	0.389953085445744
ENSMUSG00000003184	54131	Irf3	302.231560334105	0.473654441489807	0.117328587632096	4.03699090774903	5.41411663007016e-05	0.00022750124851433
ENSMUSG00000003190	75736	Bcl2l12	44.2253301254994	0.24568416533957	0.212048720390403	1.15862130593026	0.246610580355262	0.372854034039743
ENSMUSG00000003198	224893	Zfp959	41.0298395560116	0.385200084918443	0.229174096857651	1.68081860123008	0.0927981544429118	0.170094789406727
ENSMUSG00000003199	68047	Mpnd	691.660362818878	-0.465645540524785	0.116718487975295	-3.98947543446027	6.6219576480916e-05	0.000273915042709999
ENSMUSG00000003200	20405	Sh3gl1	258.354853865051	0.697219134122205	0.108647303883145	6.41727046326063	1.38739315436987e-10	1.42754894398334e-09
ENSMUSG00000003206	50498	Ebi3	7.1117549467791	3.61922199294635	0.805556081415387	4.49282436871095	7.02847477451021e-06	3.47834436606438e-05
ENSMUSG00000003208	72886	Yju2	82.2482001318024	0.164726903462301	0.153884037871798	1.07046127551927	0.28441173067303	0.416113783732162
ENSMUSG00000003226	19386	Ranbp2	522.847621068944	-0.220427051059781	0.132839270751667	-1.659351559313	0.0970449713453684	0.176578397491297
ENSMUSG00000003227	13608	Edar	2.27066777980014	-0.417640098789271	0.915114163822418	-0.456380324226208	0.648116512016726	0.757206545686035
ENSMUSG00000003228	14773	Grk5	81.2206336099673	0.183058793455734	0.16982487623029	1.07792684746314	0.281066403131101	0.412333004942766
ENSMUSG00000003233	13544	Dvl3	347.031367255986	-0.468010710754947	0.121042068725244	-3.86651282222625	0.000110402661926555	0.000436950020901937
ENSMUSG00000003234	27406	Abcf3	603.097802839203	-0.195912774726812	0.085107717458487	-2.30193900832051	0.0213386119806132	0.0492807517980317
ENSMUSG00000003235	224045	Eif2b5	634.163494013271	-0.386250830036909	0.0828736842937315	-4.66071749227305	3.15108988322614e-06	1.65709675909704e-05
ENSMUSG00000003269	19158	Cyth2	278.47215532651	0.488270673144917	0.111446813303313	4.38119905515865	1.18027981042265e-05	5.63498345302924e-05
ENSMUSG00000003271	54200	Sult2b1	0.685499529010084	0.303489892925297	1.59383424406417	0.190414965706483	0.848983971274982	NA
ENSMUSG00000003271	545963	Sult2b1	0.685499529010084	0.303489892925297	1.59383424406417	0.190414965706483	0.848983971274982	NA
ENSMUSG00000003273	12348	Car11	55.6601112525286	-1.027915066833	0.236989284860044	-4.33739047501682	1.4418434175111e-05	6.75732103389241e-05
ENSMUSG00000003279	224997	Dlgap1	2.08524158986437	-1.43330424790529	1.08208072026858	-1.32458163338271	0.185309950949071	0.298393727534784
ENSMUSG00000003282	56711	Plag1	1.79202064150572	-0.731180780510081	0.920242350152055	-0.794552413708482	0.42687390852465	0.563933502040331
ENSMUSG00000003283	15162	Hck	55.0724533009017	3.48571190688845	0.376218400713882	9.26512871320021	1.94842182962983e-20	8.17103443678682e-19
ENSMUSG00000003299	66163	Mrpl4	619.009758346702	-0.343725958951377	0.0908520773884236	-3.78335827679351	0.00015472644214189	0.000595649521438899
ENSMUSG00000003308	50868	Keap1	809.228264385067	-0.677417666463698	0.0901047468293699	-7.51811297740522	5.55724723565514e-14	9.00461676278943e-13
ENSMUSG00000003309	11768	Ap1m2	0.196953146018719	1.38415153064863	4.32043677041403	0.320373055827869	0.748685548345781	NA
ENSMUSG00000003316	20340	Glg1	1043.85421246194	0.355389814647275	0.101953754052318	3.48579429909865	0.00049067815659991	0.00171117640183121
ENSMUSG00000003341	67331	Atp8b3	0.128135670577551	0.606959920202541	4.32794324778021	0.140242116278639	0.888468696717425	NA
ENSMUSG00000003344	208198	Btbd2	425.734687135414	-0.565367576821429	0.113908703357173	-4.96333958827234	6.92912731397853e-07	4.06136723663464e-06
ENSMUSG00000003345	103236	Csnk1g2	1459.69373455212	-0.164188246565979	0.0783334245381353	-2.09601772849912	0.0360806183050571	0.0776010481407422
ENSMUSG00000003346	216169	Abhd17a	880.369969084702	-0.121440871178246	0.103748026779575	-1.17053668342302	0.241785060700227	0.367324500191022
ENSMUSG00000003348	208228	Mob3a	16.9715332593113	0.381893730869257	0.371603379831423	1.02769175846168	0.304094845819568	0.437550132570849
ENSMUSG00000003352	12297	Cacnb3	65.8012391547469	1.06548358133242	0.189451750852601	5.6240366031845	1.86546095880173e-08	1.39370261477266e-07
ENSMUSG00000003354	105833	Ccdc65	0.950982386714703	2.91443003633548	1.41603509800697	2.05816228738783	0.0395745574448074	0.0837924742032544
ENSMUSG00000003355	66120	Fkbp11	20.067049409543	2.16191285364876	0.358742749672065	6.02635971214752	1.67693736741094e-09	1.47413983928924e-08
ENSMUSG00000003360	74351	Ddx23	872.828335341541	-0.543009609659649	0.0754253159182881	-7.1993017602726	6.05216772256893e-13	8.69519207297376e-12
ENSMUSG00000003363	18807	Pld3	602.332243549693	2.45455357073811	0.253211264741483	9.69369815850844	3.20701324074662e-22	1.73773564230456e-20
ENSMUSG00000003378	14809	Grik5	85.5153470700659	0.262321774279592	0.176690408941721	1.48464071055557	0.137639025180946	0.235058021737891
ENSMUSG00000003379	12518	Cd79a	4.22326338037782	0.52474018145336	0.681690887433557	0.769762646276397	0.44144070128984	0.578477147926592
ENSMUSG00000003380	14470	Rabac1	1854.52560615225	-0.174667693302896	0.12098378850482	-1.44372808507264	0.148815478054289	0.250097848185786
ENSMUSG00000003382	27049	Etv3	152.460460908327	-0.0263370453036302	0.129636627414814	-0.203160525145076	0.839009565754921	0.898089098662946
ENSMUSG00000003402	19089	Prkcsh	429.59325537053	0.297921630750198	0.131595817071786	2.2639141378459	0.0235793962295616	0.0536899652553759
ENSMUSG00000003410	15571	Elavl3	1.3910438210483	2.39163060727452	1.45676662729729	1.64173901465033	0.100644102514377	0.182136233078898
ENSMUSG00000003411	69908	Rab3b	2.14510965954126	-0.797851731053616	0.968106019976779	-0.824136731504627	0.409861871306063	0.547705233354304
ENSMUSG00000003418	241230	St8sia6	13.0836714168443	-1.05227004608328	0.374668799827269	-2.80853395470452	0.00497676339571531	0.0138425030726416
ENSMUSG00000003420	14132	Fcgrt	964.531272044698	0.491578491370471	0.126661773002888	3.88103276715749	0.000104013824320957	0.000413695078302591
ENSMUSG00000003421	66394	Nosip	332.951330807437	0.214430687762063	0.113636626801372	1.88698568232644	0.0591622514328172	0.117479411105437
ENSMUSG00000003423	68845	Pih1d1	304.604196983281	0.00592690095848446	0.131396674064332	0.04510693288616	0.964022075404928	0.977895193478314
ENSMUSG00000003429	27207	Rps11	695.397296551744	0.656059692660413	0.13773910388939	4.76306055531807	1.90678589261074e-06	1.04443160971073e-05
ENSMUSG00000003435	20924	Supt5	615.937858245651	-0.602511276335282	0.138091120185189	-4.36314279677996	1.28207198574426e-05	6.08350400580203e-05
ENSMUSG00000003436	13389	Dll3	0	NA	NA	NA	NA	NA
ENSMUSG00000003437	54624	Paf1	406.050752503711	-0.0684722289894274	0.103626619545408	-0.66075907223263	0.508766833781221	0.640430467028543
ENSMUSG00000003438	66525	Timm50	633.82836701163	-0.219290865827133	0.0926707914699429	-2.36634286109727	0.0179647987388012	0.0425568748593272
ENSMUSG00000003444	67224	Med29	123.1833350001	0.230603930773534	0.167027785561831	1.38063215050031	0.167392092742808	0.275416081415133
ENSMUSG00000003452	12121	Bicd1	14.9984750849808	1.11406857092132	0.403458554245027	2.76129619560557	0.00575724366159402	0.0157439642500001
ENSMUSG00000003458	59287	Ncstn	470.909816985934	0.468886984339477	0.0907832836823205	5.16490443307009	2.4056179939764e-07	1.52676454359516e-06
ENSMUSG00000003464	19298	Pex19	1168.69223177919	-0.360560987502573	0.072055051827853	-5.00396541749759	5.61628368205771e-07	3.34339722915644e-06
ENSMUSG00000003469	105653	Phyhip	8.02206838928093	-1.17593637609574	0.484577826046226	-2.42672345470376	0.0152358645493816	0.0369748311415996
ENSMUSG00000003476	12922	Crhr2	410.22500534826	-1.08453814194528	0.13542731013124	-8.00826761525625	1.16335535967674e-15	2.35675919447278e-14
ENSMUSG00000003477	21743	Inmt	110.047810518459	-1.23785280781805	0.307935686415661	-4.01984200735721	5.8237183110815e-05	0.000243141445725911
ENSMUSG00000003484	72054	Cyp4f18	44.1051742832161	4.11187326897372	0.462728417803498	8.88614813953324	6.32639924476846e-19	2.05348195775842e-17
ENSMUSG00000003500	23917	Impdh1	235.981476806347	0.38553743055466	0.107757934875997	3.5778101259858	0.000346484996781138	0.0012427220783127
ENSMUSG00000003505	26438	Psg18	0	NA	NA	NA	NA	NA
ENSMUSG00000003518	72349	Dusp3	960.441711548872	-0.624891152269704	0.149798532517023	-4.17154388477532	3.02542773563783e-05	0.000133414016336145
ENSMUSG00000003526	19125	Prodh	72.0567157067874	-1.04909386288225	0.189902467167232	-5.52438248186844	3.30646459788636e-08	2.38968830762264e-07
ENSMUSG00000003527	27886	Ess2	122.995669057034	0.058756319484537	0.163729884633264	0.358861301442582	0.719698850874801	0.812897553349959
ENSMUSG00000003528	13358	Slc25a1	216.214791904381	-0.59077961509056	0.429882694071102	-1.37428099162523	0.169354465142483	0.2778962840994
ENSMUSG00000003531	13353	Dgcr6	380.860460090584	-0.101049635398329	0.120805567690696	-0.836465051487125	0.402893329808407	0.540759145621791
ENSMUSG00000003534	12305	Ddr1	259.180784761831	0.32676557453362	0.12493384515836	2.61550882484588	0.00890946188825605	0.0230743958989563
ENSMUSG00000003541	15937	Ier3	78.9257359516714	0.584386685316849	0.225936686416587	2.58650639958198	0.00969543699667693	0.024886148419969
ENSMUSG00000003545	14282	Fosb	75.6098927100227	1.00828970831683	0.712945124959691	1.4142599100791	0.157285603270597	0.261653417177933
ENSMUSG00000003546	74764	Klc4	252.491023582558	0.110906175451525	0.121287278795687	0.914408968135484	0.360501991218364	0.497885483863554
ENSMUSG00000003549	13870	Ercc1	181.573526944265	-0.0119036319572021	0.121357027673364	-0.0980877019272516	0.921862652873724	0.953068959018088
ENSMUSG00000003555	13074	Cyp17a1	0.165873701904186	-0.11435127590161	4.01252234397636	-0.0284986016522189	0.977264483297428	NA
ENSMUSG00000003559	57344	As3mt	370.863859108474	-0.654397318267128	0.123169970974946	-5.31296153670637	1.07857810351529e-07	7.22529040630035e-07
ENSMUSG00000003573	26558	Homer3	44.0301484106246	0.525115666946597	0.201990816255763	2.59970070263834	0.00933050990539086	0.024032083843977
ENSMUSG00000003575	382056	Crtc1	167.039875155112	-0.385213901847761	0.123708406449378	-3.11388621763059	0.00184640679337742	0.005701290094073
ENSMUSG00000003581	71673	Rnf215	96.3250509265424	0.196439605034484	0.145204771600701	1.35284538427342	0.176105030437212	0.286778889846735
ENSMUSG00000003585	67815	Sec14l2	9.35890086862481	1.4481422632327	0.442493257395772	3.27268775066886	0.0010653009384192	0.0034679055257939
ENSMUSG00000003604	74268	Aven	236.380276259424	0.0240081914063704	0.116046540359584	0.206884163301881	0.836100324812605	0.895841295333893
ENSMUSG00000003617	12870	Cp	147.7449834862	-0.77620469260068	0.177214414151944	-4.3800313666086	1.18662226930325e-05	5.66392258639488e-05
ENSMUSG00000003623	74114	Crot	361.874300753784	-0.614507563843675	0.104269580761029	-5.89345002980342	3.78214511587986e-09	3.14767543768746e-08
ENSMUSG00000003644	20111	Rps6ka1	146.088333235015	0.602567603537266	0.152679187181992	3.94662569705071	7.92603193335217e-05	0.000323476464224701
ENSMUSG00000003657	12308	Calb2	0	NA	NA	NA	NA	NA
ENSMUSG00000003660	320632	Snrnp200	582.11473271971	-0.623430556930326	0.128788672534251	-4.84072507824416	1.29366240171914e-06	7.27779878075713e-06
ENSMUSG00000003662	26371	Ciao1	407.352016174859	-0.169433472194716	0.102158199757498	-1.6585401132451	0.0972084979957871	0.176828056502218
ENSMUSG00000003665	15116	Has1	16.2076016783879	3.25122820038053	0.600488138901208	5.41430877607296	6.1525915112146e-08	4.28090393826554e-07
ENSMUSG00000003680	225895	Taf6l	154.965388203911	0.754316289651882	0.15860031248339	4.75608325003068	1.97385097720951e-06	1.07911348379745e-05
ENSMUSG00000003680	100039957	Taf6l	154.965388203911	0.754316289651882	0.15860031248339	4.75608325003068	1.97385097720951e-06	1.07911348379745e-05
ENSMUSG00000003721	72999	Insig2	576.924276366909	-0.579558091716583	0.136679187321893	-4.24028049238883	2.23240650113915e-05	0.000101165957381884
ENSMUSG00000003731	16650	Kpna6	825.74424573769	-0.699874795079947	0.110390292663023	-6.3400030763247	2.29760574513297e-10	2.3087158028238e-09
ENSMUSG00000003746	17155	Man1a	272.511629579875	0.582588376357858	0.124185513999446	4.69127483226794	2.71507966650632e-06	1.44438798727284e-05
ENSMUSG00000003752	233011	Itpkc	26.5427026056722	0.0236919872533197	0.260669520790876	0.0908889815020865	0.927580805441397	0.956505889158153
ENSMUSG00000003762	76889	Coq8b	43.7967081048786	1.20369442049386	0.230609796941325	5.2196152828673	1.792951820468e-07	1.15797916838108e-06
ENSMUSG00000003778	78656	Brd8	180.045360787926	0.18759997115421	0.115493867334576	1.62432842092601	0.104305734673426	0.187337672085204
ENSMUSG00000003779	19348	Kif20a	16.8005468126041	1.61087304372353	0.347559365771688	4.63481408462956	3.57258416658092e-06	1.86851528401068e-05
ENSMUSG00000003808	66590	Farsa	328.749761423992	0.154574076072308	0.112061042212195	1.37937389320021	0.167779504261664	0.275918370515
ENSMUSG00000003809	270076	Gcdh	356.222954972125	-0.392785996951399	0.141902688885828	-2.76799544839793	0.0056402243373925	0.0154638196366731
ENSMUSG00000003810	17776	Mast2	1156.95091554761	-1.04773451889049	0.145034310534082	-7.22404591735747	5.04632059987037e-13	7.34430933802072e-12
ENSMUSG00000003812	13423	Dnase2a	163.34173749974	2.21790737116854	0.241660213700323	9.17779280754467	4.40017658873562e-20	1.7319386020558e-18
ENSMUSG00000003812	100503676	Dnase2a	163.34173749974	2.21790737116854	0.241660213700323	9.17779280754467	4.40017658873562e-20	1.7319386020558e-18
ENSMUSG00000003813	19358	Rad23a	871.796379869747	-0.726566761313024	0.123982483555946	-5.86023719217695	4.62206493444201e-09	3.78855685849989e-08
ENSMUSG00000003814	12317	Calr	2629.86374000442	0.602477603027061	0.10375803165046	5.80656353482769	6.37680814839605e-09	5.11896940849141e-08
ENSMUSG00000003824	71846	Syce2	13.8604294943685	1.52160201527297	0.406883491581126	3.73965040793399	0.000184276359217482	0.000700048732142249
ENSMUSG00000003847	54446	Nfat5	303.067525814478	0.0658716927329663	0.116884279256744	0.563563322217822	0.573051354145143	0.695778453690526
ENSMUSG00000003848	67619	Nob1	280.268081005102	-0.235080528382015	0.109522756569917	-2.14640806846333	0.0318404361687059	0.0695952799666672
ENSMUSG00000003849	18104	Nqo1	142.176857762339	-0.630316190433115	0.192076865669018	-3.28158306955748	0.00103226113629448	0.0033652414239508
ENSMUSG00000003863	76787	Ppfia3	11.1568450405587	0.120517640734976	0.421820209704664	0.285708550615335	0.775101355133514	0.854035094316511
ENSMUSG00000003865	14936	Gys1	4739.31308724201	-0.892043671498083	0.106930314294469	-8.34228981167623	7.28656077533434e-17	1.74229188076411e-15
ENSMUSG00000003868	20174	Ruvbl2	326.383854259378	-0.275630580975698	0.132748862996679	-2.07633101145728	0.0378633470143594	0.0807973201109932
ENSMUSG00000003872	22342	Lin7b	1.5115930867113	0.373699122934344	1.21736316623126	0.306974231930517	0.758862985840284	0.842080185556339
ENSMUSG00000003873	12028	Bax	120.923279675311	1.10559601235624	0.147176559245707	7.51203872425421	5.82135619856827e-14	9.41742190164853e-13
ENSMUSG00000003882	16197	Il7r	44.2889824854944	6.8010900521491	0.969699799553524	7.01360364855237	2.3225675906082e-12	3.05986894927383e-11
ENSMUSG00000003923	21780	Tfam	461.888522298611	-0.27092011891457	0.0990417861973637	-2.73541228724105	0.00623021879544748	0.0168816400403058
ENSMUSG00000003929	224694	Zfp81	44.5803390072178	-0.108075110358123	0.233167490298623	-0.463508485765788	0.64299993377809	0.753280812807449
ENSMUSG00000003934	13643	Efnb3	13.7452275800031	-1.99977130207167	0.400372280691619	-4.99477960516445	5.89029956074559e-07	3.49413679358296e-06
ENSMUSG00000003948	67468	Mmd	168.865798542427	0.0364479715919285	0.217824255007156	0.167327424536497	0.867112426666897	0.917885998546615
ENSMUSG00000003949	217082	Hlf	51.2955519893845	-2.59679320312532	0.262971151671618	-9.87482157878683	5.35281350037989e-23	3.29959210174793e-21
ENSMUSG00000003955	70186	Fam162a	712.047823801416	-0.127406615009202	0.107349858097561	-1.18683543012617	0.235292540593004	0.359765739265204
ENSMUSG00000003970	26961	Rpl8	4529.0664872368	0.446541107815149	0.109056467281002	4.09458621710678	4.22923016077483e-05	0.000180879678231993
ENSMUSG00000003974	108069	Grm3	0.0701865425158341	0	4.32794324778021	0	1	NA
ENSMUSG00000003992	66970	Ssbp2	127.742628603634	0.0689905446912515	0.155852412828477	0.442665874972233	0.658007428931475	0.765214085557708
ENSMUSG00000004018	67030	Fancl	31.9105399301377	0.47490123239327	0.246878966347031	1.92361965630444	0.0544022753809228	0.109461635541352
ENSMUSG00000004031	240843	Brinp2	4.38340213612731	-2.10400852274898	0.725409161023931	-2.90044382645944	0.00372634621707564	0.010733346770162
ENSMUSG00000004032	14866	Gstm5	391.328522432476	-0.384400082157082	0.145177947329734	-2.64778562603601	0.00810208845907985	0.0212537476665373
ENSMUSG00000004035	68312	Gstm7	36.6497972584819	-0.701333846230705	0.248286422773411	-2.82469672886926	0.00473253859704931	0.013249136180656
ENSMUSG00000004038	14864	Gstm3	0.445564256014112	-2.06094323105533	2.14689157360082	-0.959966146589633	0.337072253248829	NA
ENSMUSG00000004040	20848	Stat3	720.135024422779	0.34902085940798	0.145969046013647	2.39106076897529	0.0167997719748951	0.0401985996792452
ENSMUSG00000004043	20850	Stat5a	207.246297829252	0.104444791034041	0.116047127912159	0.900020473691512	0.368109355299257	0.505861758574251
ENSMUSG00000004044	19285	Cavin1	2876.54851079355	0.177489566027001	0.116115819438489	1.52855628875808	0.12637447923284	0.219049821815837
ENSMUSG00000004054	26403	Map3k11	398.842389862381	0.185052195518147	0.104518300969966	1.7705243368941	0.0766398338687705	0.144977276699718
ENSMUSG00000004056	11652	Akt2	2604.70440725098	-0.296592564926881	0.0959484092290576	-3.09116708979328	0.00199371408300787	0.006103781101335
ENSMUSG00000004069	83945	Dnaja3	1114.04790673745	-0.783320716408873	0.0805808372699663	-9.72093047115593	2.45527481861737e-22	1.34852791604551e-20
ENSMUSG00000004070	15369	Hmox2	337.144781410418	0.250693085447071	0.103694357500098	2.41761549510382	0.0156225752919703	0.0378081702677687
ENSMUSG00000004071	66626	Cdip1	839.712463412142	-0.49241209146857	0.10633995474323	-4.63054637043578	3.64702093764534e-06	1.90201813816603e-05
ENSMUSG00000004085	65964	Map3k20	2297.66507431394	-0.814597101758759	0.104709212712574	-7.77961251599534	7.27470197816367e-15	1.32943035153078e-13
ENSMUSG00000004096	66070	Cwc15	680.693715553013	0.0223890316998927	0.127481125490137	0.175626247523402	0.860587580314363	0.913906741288478
ENSMUSG00000004098	53867	Col5a3	1545.98836056317	0.690227642343204	0.112666049947274	6.12631438366944	8.99380155679904e-10	8.22914471086692e-09
ENSMUSG00000004099	13433	Dnmt1	155.148570725025	0.628943613123114	0.14704723654426	4.27715357257876	1.89298217137587e-05	8.69176346888915e-05
ENSMUSG00000004100	235036	Ppan	123.191327099198	0.840669855687498	0.181584275124273	4.62964017733452	3.66301688152507e-06	1.90937241481512e-05
ENSMUSG00000004105	26360	Angptl2	1095.3048543672	0.828360162636678	0.126244758661748	6.56154102093168	5.32545204161874e-11	5.83080590998962e-10
ENSMUSG00000004110	12290	Cacna1e	0.722389886957435	0.340801521961807	1.51848981036092	0.2244345135782	0.822419217624698	0.886518522881509
ENSMUSG00000004113	12287	Cacna1b	1.6726392425781	1.02101552641626	1.02271243968868	0.998340771846943	0.318114143293899	0.45316090363075
ENSMUSG00000004127	108943	Trmt10a	22.4020441048724	0.322902665113144	0.314086459513639	1.02806935903304	0.303917202738702	0.43740256835686
ENSMUSG00000004151	14009	Etv1	43.0400837814565	-0.101175020189232	0.195913453548516	-0.51642711797828	0.605556129800397	0.722773265536867
ENSMUSG00000004187	16581	Kifc2	49.9830258045488	-0.368784111244868	0.225514371635461	-1.63530203671897	0.101985746831594	0.183990575394651
ENSMUSG00000004207	19156	Psap	14545.4286428672	0.691826462598536	0.134293770239312	5.15159013977865	2.58287027622008e-07	1.62900238290889e-06
ENSMUSG00000004221	16151	Ikbkg	204.240274998475	-0.392526230283842	0.122130511247536	-3.21398990534203	0.00130904275354878	0.00417572001634479
ENSMUSG00000004231	18504	Pax2	0.109313131457708	-0.835687828851883	4.32794324778021	-0.193091217007179	0.846887531034479	NA
ENSMUSG00000004233	70560	Wars2	56.8356761886765	-0.348108039211952	0.176574610979145	-1.97145012684222	0.0486724122572531	0.0996333719782116
ENSMUSG00000004263	13498	Atn1	140.005368902695	-0.0303744404015468	0.158607943671992	-0.191506425834273	0.848128846621849	0.904823391624675
ENSMUSG00000004264	12034	Phb2	1167.75519328718	-0.349274919782026	0.0698659812936537	-4.99921296909849	5.75647942463238e-07	3.420794686389e-06
ENSMUSG00000004266	15170	Ptpn6	130.833574774883	3.31010807110743	0.314682850635326	10.5188702353005	7.07164131087645e-26	6.42085918483498e-24
ENSMUSG00000004267	13807	Eno2	26.5216451570214	1.48580264873807	0.383472367396275	3.87460160122219	0.000106799278413769	0.000423686883484814
ENSMUSG00000004268	14791	Emg1	584.528793429787	-0.0121409018960924	0.117455892336983	-0.103365626487771	0.917672792068013	0.950589982512716
ENSMUSG00000004270	14792	Lpcat3	226.593921021088	-0.288876513515338	0.0984036757081199	-2.93562726632478	0.0033287403363852	0.00969055733109712
ENSMUSG00000004285	66144	Atp6v1f	788.763047793359	0.404988944740779	0.106213462886661	3.81297185624139	0.000137305752994351	0.000534402792644746
ENSMUSG00000004296	16160	Il12b	0.917516773187019	4.09946514438208	1.56183981181363	2.62476670998784	0.00867083539312359	0.022554914055903
ENSMUSG00000004317	12728	Clcn5	106.834904270484	1.86770417599463	0.209709907498454	8.90613227707613	5.28438710427498e-19	1.74618673542411e-17
ENSMUSG00000004319	12725	Clcn3	424.634287763147	-0.654896227788523	0.148480717263221	-4.41064833103915	1.03061579011464e-05	4.96750896253964e-05
ENSMUSG00000004328	53417	Hif3a	6.17810834670347	-1.36687256693863	0.624501724636617	-2.18874106029728	0.0286156657906027	0.0634131459258111
ENSMUSG00000004341	75512	Gpx6	0	NA	NA	NA	NA	NA
ENSMUSG00000004344	14780	Gpx5	0	NA	NA	NA	NA	NA
ENSMUSG00000004347	18575	Pde1c	11.6798049791843	1.33171826169477	0.472785823382651	2.81674744848883	0.00485126563955201	0.0135382751621833
ENSMUSG00000004356	70683	Utp20	133.956151511059	-0.0140083863789135	0.157580765745283	-0.0888965497321986	0.929164125612341	0.957132117741617
ENSMUSG00000004359	20728	Spic	3.71450753338165	2.14388958012613	0.702573328455252	3.05148159387135	0.00227715009423612	0.00687694395602235
ENSMUSG00000004360	212448	9330159F19Rik	232.884296864874	-1.05682122637454	0.143358117385009	-7.37189665748956	1.68217399255903e-13	2.57852328273858e-12
ENSMUSG00000004364	26554	Cul3	2259.90912210503	-1.01808358064285	0.100184267110419	-10.162110379275	2.92671755665928e-24	2.12208078379788e-22
ENSMUSG00000004366	20604	Sst	0	NA	NA	NA	NA	NA
ENSMUSG00000004371	16156	Il11	2.13634597542951	1.4294270418186	0.90771939561273	1.57474550916002	0.115315198679338	0.203378113551441
ENSMUSG00000004383	16795	Large1	311.061356442094	-0.243348517477913	0.153310709073112	-1.58728975261514	0.112447035044416	0.199201972385636
ENSMUSG00000004393	52513	Ddx56	278.834101653992	-0.272225588286849	0.117510473554408	-2.31660702278429	0.0205251484682312	0.0476642186260526
ENSMUSG00000004394	103694	Tmed4	670.190181047567	-0.222049189890241	0.12014332027032	-1.84820254168634	0.0645730478820465	0.126136149448436
ENSMUSG00000004415	140709	Col26a1	42.7859611337749	1.40006668810507	0.233281015250105	6.00163149411893	1.95344648440726e-09	1.70162579024188e-08
ENSMUSG00000004446	12122	Bid	19.9182817464116	2.10476795463382	0.367824099751488	5.72221329721424	1.05145184340073e-08	8.15471904864504e-08
ENSMUSG00000004451	64143	Ralb	222.404747350293	0.936615346130172	0.131570443626927	7.11873670340418	1.08920753195107e-12	1.50480851415612e-11
ENSMUSG00000004455	19047	Ppp1cc	965.545679249763	-0.476754192236688	0.113264445225458	-4.2092131497019	2.56261553991159e-05	0.000114813606219155
ENSMUSG00000004455	434233	Ppp1cc	965.545679249763	-0.476754192236688	0.113264445225458	-4.2092131497019	2.56261553991159e-05	0.000114813606219155
ENSMUSG00000004460	67838	Dnajb11	507.788674231576	0.402473695282176	0.116402169383233	3.45761335389811	0.00054498291961495	0.00188361123296957
ENSMUSG00000004462	70573	Tbccd1	90.5034011161948	-0.115788026563982	0.181471000093974	-0.638052507034301	0.523439500896732	0.653402969703221
ENSMUSG00000004473	20256	Clec11a	111.678273673923	0.513278370229285	0.255491377835746	2.008985096003	0.0445387143482749	0.0925628276232784
ENSMUSG00000004500	243834	Zfp324	35.2198743908785	0.101455797966545	0.233267123622228	0.434933977798135	0.663610350726902	0.769288810651148
ENSMUSG00000004508	14389	Gab2	131.873127225379	0.480798193268305	0.162749524514563	2.9542218000476	0.00313458629811906	0.00919706783277815
ENSMUSG00000004530	23790	Coro1c	211.373481927804	1.02169629258599	0.174182337044526	5.865671054378	4.47319839889665e-09	3.68025551536978e-08
ENSMUSG00000004535	52440	Tax1bp1	805.799625377157	-0.188471094355416	0.0759684378913233	-2.48091312111792	0.0131046309147087	0.0324070721810554
ENSMUSG00000004540	26437	Psg17	0.577338228863613	-1.6668495129846	2.14438548105545	-0.777308710448921	0.436976657220299	NA
ENSMUSG00000004542	26439	Psg19	0.0650779221030176	-0.835681072974956	4.32794324778021	-0.193089656016995	0.846888753521154	NA
ENSMUSG00000004552	13034	Ctse	1.82703730519063	3.31221881859059	1.22426400094544	2.70547758982762	0.00682062501914163	0.0182702110977858
ENSMUSG00000004558	29811	Ndrg2	18498.8772769601	-0.730066992569369	0.112698689176992	-6.47804333751217	9.29196685230877e-11	9.76019676091651e-10
ENSMUSG00000004561	52535	Mettl17	145.263857251065	-0.157599115129577	0.12279870539049	-1.28339394644613	0.199354093642416	0.316134093741655
ENSMUSG00000004562	268739	Arhgef40	268.637810252523	0.424047705132194	0.13633571699778	3.11031998415426	0.00186884770407854	0.00576216535539668
ENSMUSG00000004565	50767	Pnpla6	129.672262805062	-0.0975143918531035	0.133685960243659	-0.729428817172512	0.465739395638309	0.601248771943832
ENSMUSG00000004567	94178	Mcoln1	358.634734187579	-0.0677316030299502	0.0935570752803768	-0.723960243808056	0.469090142820852	0.604706089789034
ENSMUSG00000004568	102098	Arhgef18	142.264901423736	-0.610728119705384	0.151718289741071	-4.02540867516815	5.68764510346882e-05	0.000237805149036758
ENSMUSG00000004591	109333	Pkn2	387.919861634171	-0.821945165329009	0.13572629089572	-6.05590235984947	1.39632683608197e-09	1.24209002801872e-08
ENSMUSG00000004609	12489	Cd33	68.874623386045	1.50977104921026	0.183157707124271	8.24301129837737	1.67929709744124e-16	3.85530655958121e-15
ENSMUSG00000004610	110826	Etfb	88.174911909454	-0.444624213584109	0.251476368189493	-1.7680556498616	0.0770516007514606	0.145587656200524
ENSMUSG00000004612	72310	Nkg7	5.03350711746527	4.63057019895067	1.11784412930126	4.14241134123514	3.43673238889493e-05	0.000149588025832337
ENSMUSG00000004626	20911	Stxbp2	82.2844985436453	1.46941825816594	0.238976966193973	6.14878614273327	7.80781677580872e-10	7.21274806370194e-09
ENSMUSG00000004630	18545	Pcp2	0.196777526811463	-0.114349661419335	3.7988375786879	-0.0301012241378403	0.975986324453878	NA
ENSMUSG00000004631	20392	Sgce	159.432694309798	0.467765738376714	0.141201000989958	3.31276503068119	0.000923785543830245	0.00305008111498546
ENSMUSG00000004633	69993	Chn2	17.5444391046181	1.28819695857336	0.3355350926581	3.83923168324453	0.000123419926132529	0.000484285663043292
ENSMUSG00000004637	80707	Wwox	100.264572552792	-0.53223192257873	0.146763928344672	-3.62644914579278	0.000287345377482654	0.00104965943710001
ENSMUSG00000004642	20492	Slbp	89.8821515666536	0.801962290030537	0.196570607714946	4.07976705852937	4.5080852406935e-05	0.000191991282900188
ENSMUSG00000004651	22173	Tyr	0	NA	NA	NA	NA	NA
ENSMUSG00000004654	14602	Ghrhr	0	NA	NA	NA	NA	NA
ENSMUSG00000004655	11826	Aqp1	3444.50729693104	-1.15771633496182	0.148032746780624	-7.82067724972699	5.2539894815046e-15	9.77882419009125e-14
ENSMUSG00000004661	56380	Arid3b	33.4703969141486	-0.467736461362956	0.249430842666953	-1.87521501495904	0.0607631493360555	0.120099439405237
ENSMUSG00000004665	12798	Cnn2	315.992550273971	0.971154259991136	0.135266835989657	7.17954443811634	6.99440868350253e-13	9.95665931026558e-12
ENSMUSG00000004667	66420	Polr2e	551.31766436999	0.325042037396707	0.0920932719984283	3.5294873376011	0.000416365628807969	0.00146853577950695
ENSMUSG00000004668	268379	Abca13	0.0402476891642483	0.606966676079468	4.32794324778021	0.140243677268823	0.888467463415622	NA
ENSMUSG00000004677	17925	Myo9b	236.246247865965	0.903284091463476	0.158743464322451	5.6902127928156	1.26881154795277e-08	9.72819869611413e-08
ENSMUSG00000004698	79221	Hdac9	83.8162061776086	0.678974067331469	0.243348445905324	2.79013110112743	0.00526867026975907	0.0145719795043268
ENSMUSG00000004707	17085	Ly9	58.5729536742591	5.37814536528118	0.669386456867873	8.03444006089706	9.40072214679232e-16	1.93357506441727e-14
ENSMUSG00000004709	18106	Cd244a	6.78551029373924	2.96758797166064	0.642698437082988	4.6173878765438	3.88600520698346e-06	2.01881976693726e-05
ENSMUSG00000004730	13733	Adgre1	296.227839428482	3.02326636610032	0.271226397346713	11.1466523748263	7.43512188907646e-29	1.02650515012407e-26
ENSMUSG00000004748	67900	Mtfp1	769.673884617729	-0.873837142468194	0.115529589052158	-7.56375184606331	3.91606502481348e-14	6.50751217684792e-13
ENSMUSG00000004768	19335	Rab23	76.820182706822	0.0882041913690446	0.162962822245077	0.541253459862127	0.588332894095558	0.70833987255311
ENSMUSG00000004771	53869	Rab11a	493.236003750249	0.0228524375707513	0.145390562341726	0.157179649096061	0.87510326660188	0.923404407802144
ENSMUSG00000004788	217715	Eif2b2	448.237342605236	-0.224342818724646	0.0946595801960585	-2.36999591863801	0.0177882816206356	0.0421833403090766
ENSMUSG00000004789	78920	Dlst	3648.01468820807	-0.561626818527377	0.0739655325037687	-7.59308828742308	3.1236955422669e-14	5.27781484035824e-13
ENSMUSG00000004791	18654	Pgf	18.9722002252441	0.146996548941325	0.305049915357636	0.481877035661488	0.629893300430066	0.742674266306086
ENSMUSG00000004798	29869	Ulk2	1042.31403666056	-0.877969809178185	0.116062650846804	-7.56461964958096	3.89001135204651e-14	6.48024453084309e-13
ENSMUSG00000004814	56221	Ccl24	31.4352885579989	0.217751812672531	0.446547973868992	0.487633637178733	0.625809365328935	0.73945948630842
ENSMUSG00000004815	110524	Dgkq	27.7194916807982	-0.844555719868888	0.362768248465583	-2.32808610853111	0.0199075317855997	0.0464386203219921
ENSMUSG00000004821	67366	Tmed11	0	NA	NA	NA	NA	NA
ENSMUSG00000004837	71520	Grap	76.6397580040698	0.276040070615651	0.157956555156093	1.74756957913439	0.0805385868330259	0.151281585465236
ENSMUSG00000004842	18736	Pou1f1	0.358016115935808	0.606982423240411	2.80120846173103	0.216685916643748	0.828453124150538	NA
ENSMUSG00000004843	68942	Chmp2b	451.551087383646	0.0360614949027967	0.0916866004235208	0.393312596783179	0.694088615529743	0.79303617635376
ENSMUSG00000004846	26433	Plod3	346.689062307617	0.611783534280599	0.104721005013763	5.84203268675843	5.15676846496654e-09	4.19640621511225e-08
ENSMUSG00000004849	11769	Ap1s1	349.906079866171	1.3426185025676	0.144783519516906	9.27328267089696	1.80503270596212e-20	7.65979879033232e-19
ENSMUSG00000004864	26415	Mapk13	0.872653999224319	2.13427353579538	1.4970849166891	1.42561955704922	0.153978187918232	0.257294067302313
ENSMUSG00000004865	20815	Srpk1	258.509830088287	-0.115774427139307	0.10167289267996	-1.13869512401634	0.254830337178587	0.382217062765741
ENSMUSG00000004872	18505	Pax3	13.0841531137764	-0.203671272933083	0.404556113923113	-0.503443813907584	0.614652273825508	0.730446340292933
ENSMUSG00000004880	98386	Lbr	159.182696127174	-0.406079446620717	0.181878796713779	-2.23269261704959	0.0255692216629118	0.0575800246966051
ENSMUSG00000004885	12904	Crabp2	4.65793830562401	1.66242732191611	0.806861735496124	2.06036207788924	0.0393639393870207	0.0834253944090186
ENSMUSG00000004891	18008	Nes	992.411687129887	0.897951550499406	0.218793150030569	4.10411180776888	4.05871151808414e-05	0.000174215179024749
ENSMUSG00000004892	12032	Bcan	1.81732174905771	2.30750247842138	1.13377416894462	2.03523994603734	0.0418267354947086	0.0878963206178942
ENSMUSG00000004894	73940	Hapln2	1.59681537031893	-2.46807030988194	1.15859568667219	-2.1302257019193	0.0331529841071992	0.0720190430702462
ENSMUSG00000004895	94315	Prcc	666.685942220228	-0.261172682071433	0.0852254417930082	-3.06449197066948	0.00218040027147189	0.00661603616920952
ENSMUSG00000004896	229503	Rrnad1	114.367393492653	0.0241846045538618	0.144817884682401	0.167000122995173	0.867369952147779	0.918046653550576
ENSMUSG00000004897	15191	Hdgf	3245.39098466083	-0.221462521512925	0.0970918865697632	-2.28095806289435	0.022550928586265	0.051642702512309
ENSMUSG00000004902	71803	Slc25a18	4.09436602648306	0.987373657178071	0.696075333513139	1.41848677814042	0.156048696183424	0.260106968408936
ENSMUSG00000004929	50492	Thop1	461.644165694354	0.0917197568946142	0.118977985996567	0.770896869083499	0.440768063083471	0.577879432714877
ENSMUSG00000004931	57267	Apba3	715.821193564395	-1.00096041515327	0.108940367629038	-9.18814978265652	3.99656128053486e-20	1.58580090023113e-18
ENSMUSG00000004933	17179	Matk	41.9184954153682	3.3053186479168	0.452755013058925	7.30045731704934	2.8679126361695e-13	4.28528650906364e-12
ENSMUSG00000004934	59004	Pias4	331.208018213912	-0.0574911718579582	0.107014356726125	-0.537228588918138	0.591109725719707	0.710749149447157
ENSMUSG00000004936	26395	Map2k1	598.487692730279	-0.312522064304987	0.105013902029098	-2.97600658833143	0.0029202858820744	0.00862479157875074
ENSMUSG00000004937	52551	Sgta	1211.65397079959	-0.222913937002292	0.0702609862455626	-3.17265596334225	0.00151051403237927	0.0047536973225088
ENSMUSG00000004939	69564	Nmrk2	2312.23188191089	0.125560071476457	0.362138603022011	0.346718274242708	0.728802980021451	0.819827092376382
ENSMUSG00000004945	70544	Tmem242	903.215278724203	-0.281392118036036	0.0882309240311014	-3.18926862804752	0.00142633266948429	0.00451343604690657
ENSMUSG00000004947	74198	Dtx2	130.174483998632	0.0672401699258305	0.127779598574785	0.526219918326613	0.598735416270074	0.717180282015443
ENSMUSG00000004948	22788	Zp3	0.042418234944148	-0.835681072974956	4.32794324778021	-0.193089656016995	0.846888753521154	NA
ENSMUSG00000004951	15507	Hspb1	2867.35849367441	0.000989138424483208	0.19214564486315	0.00514785763261869	0.99589262201495	0.997357363945635
ENSMUSG00000004952	54153	Rasa4	475.214805095876	0.21504227571968	0.136566921335386	1.57462929981098	0.115342035684772	0.203407647707608
ENSMUSG00000004961	53420	Syt5	0.525215250273663	2.55688190592764	2.05684508881777	1.24310864237096	0.213827801507292	NA
ENSMUSG00000004980	53379	Hnrnpa2b1	4446.79465886396	-0.0548527856738566	0.0634563023810068	-0.864418247134971	0.387358172562122	0.525612836373928
ENSMUSG00000004988	108017	Fxyd4	1.47525036875178	1.79712248385602	1.2260274917562	1.46580928726302	0.142700250212873	0.24196579772202
ENSMUSG00000004994	67736	Ccdc130	65.2895132706691	0.400555306372938	0.168637176702655	2.37524912480719	0.0175371093544653	0.0416907080148551
ENSMUSG00000004996	67873	Mri1	215.504256223846	-0.038441045993529	0.128368698717307	-0.299458095140341	0.764590541024512	0.846479460396061
ENSMUSG00000005034	18749	Prkacb	480.345480486308	-0.306580655209826	0.0965801130346699	-3.17436629112011	0.00150164058275619	0.00472781598253787
ENSMUSG00000005043	27029	Sgsh	52.6481012768054	0.118421124181047	0.238011105189656	0.497544533002714	0.618805107085898	0.7340231003078
ENSMUSG00000005045	269610	Chd5	3.99804889098586	-0.0588684725184106	0.838175525141765	-0.070234062857483	0.944007363016651	0.965612321948982
ENSMUSG00000005054	13014	Cstb	247.978360829696	2.57274608323727	0.231337684728586	11.1211715733029	9.89638001321231e-29	1.33201808268308e-26
ENSMUSG00000005057	23921	Sh2b2	74.2819144152675	0.619465452953898	0.281403666074348	2.20134108981449	0.0277118860512654	0.061695216162509
ENSMUSG00000005069	19305	Pex5	374.819113434396	-0.212974622370808	0.0808623572172309	-2.63379191134222	0.00844372187716445	0.0220293672513928
ENSMUSG00000005078	104771	Jkamp	161.396001112605	0.480365593987819	0.129842427122831	3.69960424055685	0.000215935934839177	0.000809639255683274
ENSMUSG00000005087	12505	Cd44	373.794347504958	2.82234315245599	0.202909271423843	13.9093848824709	5.55551686622945e-44	5.59912767362935e-41
ENSMUSG00000005089	20511	Slc1a2	1.40720715836751	0.972091673095977	1.09777685339967	0.885509354734102	0.375881976455836	0.514194299248068
ENSMUSG00000005102	27103	Eif2ak4	59.6942938077373	-0.0677920741269192	0.197612040161453	-0.34305639510392	0.731556034348794	0.821351686067996
ENSMUSG00000005103	22388	Wdr1	878.833262366934	0.654329918171204	0.095458335239936	6.85461271167715	7.1505974131678e-12	8.83177647409457e-11
ENSMUSG00000005107	117591	Slc2a9	12.7307084159119	1.49427161985818	0.389452231650794	3.83685468568075	0.000124620161382674	0.000488234906314979
ENSMUSG00000005124	22402	Ccn4	52.9920009294225	2.00402131412255	0.314507476127199	6.37193537908792	1.86657538294263e-10	1.89639919324469e-09
ENSMUSG00000005125	17988	Ndrg1	230.754256820859	-0.591286625764478	0.140349148432513	-4.2129691014748	2.5203555220287e-05	0.000113020703576268
ENSMUSG00000005131	75311	4930550C14Rik	3.37537163771357	0.763991894234982	0.771836727808367	0.989836148902034	0.322254212771892	0.457538787549695
ENSMUSG00000005142	17159	Man2b1	473.602531911841	1.31289452505954	0.219312147152297	5.98641954906322	2.14510615137139e-09	1.85973783626637e-08
ENSMUSG00000005148	12224	Klf5	120.21321602916	1.43699026560737	0.165455818529999	8.68503917465332	3.78611878344119e-18	1.10503322262962e-16
ENSMUSG00000005150	67836	Wdr83	275.761016772872	-0.0284720348890997	0.140719493086302	-0.202331846602362	0.839657304812797	0.89854386775916
ENSMUSG00000005161	21672	Prdx2	1435.52089939449	0.352732872857248	0.10746845340964	3.2821992097786	0.00103000810028343	0.0033600701209602
ENSMUSG00000005198	20020	Polr2a	634.249113441491	-0.308008443022443	0.132202512388503	-2.32982291680887	0.0198155124221661	0.046245372686535
ENSMUSG00000005202	20415	Shbg	3.08294255430184	-0.581777971824472	0.764603937472599	-0.760888014450384	0.44672395799244	0.582857759055683
ENSMUSG00000005204	80886	Senp3	331.058151418207	0.0287608641668944	0.0854215705951364	0.336693225920761	0.736348170459899	0.825137317765187
ENSMUSG00000005220	53419	Corin	2.25593445002446	-0.758728231834257	0.914875019620742	-0.829324460240247	0.406920833449332	0.544858372106926
ENSMUSG00000005225	231999	Plekha8	51.4687488581353	-0.147714380601632	0.181613345366487	-0.813345408640271	0.416020049281374	0.553625958662199
ENSMUSG00000005232	14378	G6pc2	0	NA	NA	NA	NA	NA
ENSMUSG00000005233	66442	Spc25	18.5582294550238	2.94482091422788	0.4861658697768	6.05723498356611	1.38481224748223e-09	1.23348035671671e-08
ENSMUSG00000005237	327954	Dnah2	4.01034486105003	0.577167967151662	0.703727969492976	0.820157777113082	0.412126168562597	0.550052842356826
ENSMUSG00000005251	72388	Ripk4	0.161354864494898	-0.835693372579146	4.32794324777864	-0.193092497922211	0.846886527888434	NA
ENSMUSG00000005262	22230	Ufd1	455.031779227071	-0.0511618462132502	0.0951009469046028	-0.537974098875917	0.590594930330243	0.710309871569727
ENSMUSG00000005267	170740	Zfp287	17.0926646488598	0.283611966073823	0.293826099095858	0.965237488931497	0.334425873756509	0.470478945931739
ENSMUSG00000005268	19116	Prlr	7.08396924405353	2.05365072323336	0.611255818596156	3.35972380262962	0.000780204296096193	0.00260935423866119
ENSMUSG00000005299	56384	Letm1	999.03097808608	-0.745696018709502	0.0984524245332646	-7.57417628102749	3.61413391638245e-14	6.04565123257437e-13
ENSMUSG00000005312	56085	Ubqln1	809.518076974495	-0.264508830965264	0.0920772228074455	-2.87268471941658	0.0040700006645676	0.0116054609415319
ENSMUSG00000005320	14186	Fgfr4	89.3767900936962	1.42764248999304	0.226693868443347	6.29766698056865	3.02158792324395e-10	2.96380281113519e-09
ENSMUSG00000005338	94332	Cadm3	132.411674461906	-0.816763490242875	0.214491372750451	-3.80790835439863	0.000140147189620724	0.00054430576130731
ENSMUSG00000005339	14125	Fcer1a	3.87205021795321	0.789819140926245	0.662491849898844	1.1921945017842	0.23318498881564	0.357139261420626
ENSMUSG00000005354	56551	Txn2	2282.08278078721	-0.00362695284808347	0.0945262920965001	-0.0383697780547742	0.969392856848937	0.980827513552311
ENSMUSG00000005355	12365	Casp14	0	NA	NA	NA	NA	NA
ENSMUSG00000005357	20513	Slc1a6	0.841137995285672	1.00716286612897	1.48252577794412	0.679356056476564	0.496912286066981	0.629597143142381
ENSMUSG00000005360	20512	Slc1a3	42.7503548665481	-0.847890229798786	0.37870071008065	-2.23894544485595	0.0251594660640321	0.0567841627424359
ENSMUSG00000005362	58799	Crbn	173.684907318939	-0.653797124104591	0.132677472863439	-4.92771764485991	8.31957267379297e-07	4.82583097512647e-06
ENSMUSG00000005364	16192	Il5ra	1.01725709306232	2.3365416432428	1.5193411972241	1.53786499537548	0.124081627719452	0.215873447121499
ENSMUSG00000005370	17688	Msh6	73.5947403992122	0.331513020238696	0.202683625287624	1.6356181697868	0.101919525210957	0.183920489675673
ENSMUSG00000005371	225055	Fbxo11	387.183648345764	-0.2730436280972	0.108703810954581	-2.51181283985786	0.0120112771922105	0.0300200017809532
ENSMUSG00000005373	58805	Mlxipl	862.001507251913	-0.945823264681087	0.118567459656357	-7.97708972952916	1.49823909432915e-15	2.99201076065842e-14
ENSMUSG00000005374	27368	Tbl2	136.132998715863	0.0794893938778861	0.118501203625084	0.67078975948106	0.502354472063127	0.634379093683526
ENSMUSG00000005378	66138	Bud23	228.608940934548	-0.186404879205423	0.117902831416522	-1.58100426398498	0.11387706278737	0.201299654003773
ENSMUSG00000005397	18073	Nid1	1542.24106109507	0.0370591864476507	0.123933414255769	0.299024977809208	0.764920987453568	0.8467057849589
ENSMUSG00000005410	17218	Mcm5	54.9041984824543	2.72624819738519	0.409077500930456	6.66438068870636	2.65783716488192e-11	3.0370761753132e-10
ENSMUSG00000005413	15368	Hmox1	180.005576828036	1.60953330386811	0.24103287770404	6.67765044835265	2.42803306652723e-11	2.79348530376652e-10
ENSMUSG00000005417	26936	Mprip	1109.59135555545	-0.560905540585172	0.107194686996919	-5.2325871393355	1.67153809171597e-07	1.08547658874738e-06
ENSMUSG00000005442	71722	Cic	426.544871589815	-0.325112551668004	0.150798112152042	-2.15594576767784	0.0310879001255752	0.0681870296878366
ENSMUSG00000005447	18476	Pafah1b3	20.3155373766351	2.57215025351638	0.365964549183229	7.02841370634664	2.08894751360446e-12	2.77567007460284e-11
ENSMUSG00000005465	50931	Il27ra	14.8240641284143	0.722626547001171	0.37327257633347	1.93592187805299	0.0528772697629655	0.106841131376513
ENSMUSG00000005469	18747	Prkaca	1469.9037839007	0.0119132006840759	0.0726567657334871	0.163965469200416	0.869758327446217	0.919576113628817
ENSMUSG00000005470	66929	Asf1b	18.0456467992587	3.21049111768306	0.507842604263997	6.3218231214294	2.58495171893487e-10	2.56800748144752e-09
ENSMUSG00000005474	59310	Myl10	50.8629052041761	-1.18722018092491	0.312943847648625	-3.79371631634672	0.000148409222500983	0.000573301015322405
ENSMUSG00000005481	68278	Ddx39a	199.932157427257	0.848494815804546	0.132327507685275	6.41208189171513	1.43545688289405e-10	1.47099666438716e-09
ENSMUSG00000005483	81489	Dnajb1	167.329369315903	-0.582114130250694	0.20351072678007	-2.86036092279191	0.00423159112815365	0.012010163668008
ENSMUSG00000005493	55993	Msh4	0.153838487674782	1.95736036818495	4.28582061619122	0.456706088162047	0.647882314279322	NA
ENSMUSG00000005501	227334	Usp40	134.613700439086	-0.0608182348079016	0.141252557378871	-0.430563778358884	0.666785583205294	0.771643095928527
ENSMUSG00000005503	14028	Evx1	0	NA	NA	NA	NA	NA
ENSMUSG00000005505	67136	Kbtbd4	28.0171460296506	-0.549143575053439	0.313019856664488	-1.7543410213814	0.0793720907417405	0.149384055376402
ENSMUSG00000005506	13046	Celf1	873.448853006685	-0.332810002297892	0.0966568559153043	-3.44321154610613	0.00057484946204617	0.00197734481338987
ENSMUSG00000005510	68349	Ndufs3	3131.27287175486	-0.33092321612577	0.0948656310390479	-3.48833621303334	0.000486036495974612	0.00169645673581996
ENSMUSG00000005514	18984	Por	332.458188529782	-0.0315030232132834	0.118172430544303	-0.266585218465764	0.789788537843611	0.864124602796161
ENSMUSG00000005533	16001	Igf1r	227.184989932225	0.34989169555985	0.123518887722565	2.83269791374531	0.00461569830525375	0.0129688640561751
ENSMUSG00000005534	16337	Insr	534.414372377738	-0.993465641284087	0.107184015062032	-9.26878546870185	1.88277513749211e-20	7.92701522589412e-19
ENSMUSG00000005540	14128	Fcer2a	1.78251891516317	-0.257378629713107	0.977432388518944	-0.263321159331645	0.79230305221609	0.865794894476837
ENSMUSG00000005547	13087	Cyp2a5	0	NA	NA	NA	NA	NA
ENSMUSG00000005553	11944	Atp4a	0.0964101638055974	0	4.32794324778021	0	1	NA
ENSMUSG00000005566	21849	Trim28	693.016483306711	0.300605395722509	0.0844218757324233	3.56075238928928	0.000369793675450907	0.00131811337154093
ENSMUSG00000005575	22192	Ube2m	1466.90222766139	0.098950303981637	0.0905275900349968	1.09304029791784	0.274376106874802	0.404608909669719
ENSMUSG00000005580	11515	Adcy9	149.951264067435	-2.47419258809633	0.40866608030296	-6.05431355169511	1.41017698803798e-09	1.25330412468613e-08
ENSMUSG00000005583	17260	Mef2c	6364.98553791895	-0.347973496495359	0.0869413581499207	-4.0023931521212	6.27049882141084e-05	0.000260338712138369
ENSMUSG00000005609	22083	Ctr9	222.744229875099	-0.453272419984881	0.121202931426227	-3.73978099911533	0.000184180651507977	0.00069981703910392
ENSMUSG00000005610	13690	Eif4g2	6774.35753948424	-0.337446220013278	0.0669593841372699	-5.03956576603957	4.66589276516298e-07	2.81925660873472e-06
ENSMUSG00000005611	17540	Irag1	62.7112594413894	-1.07503268438858	0.224098422307636	-4.79714526018751	1.60942889683682e-06	8.92960591069081e-06
ENSMUSG00000005615	13026	Pcyt1a	813.760162814929	-1.07318107373413	0.179147875204485	-5.99047614999157	2.09227558258375e-09	1.81549715532245e-08
ENSMUSG00000005621	233410	Zfp592	219.001080520163	-0.728341134007067	0.13650973986056	-5.33545177619591	9.53069573374063e-08	6.4553169994963e-07
ENSMUSG00000005625	19185	Psmd4	1489.89681432416	-0.0260462232991359	0.0735325856869226	-0.354213347127926	0.723179001654336	0.815731345066953
ENSMUSG00000005628	50874	Tmod4	3791.04713251079	-0.374921603995288	0.103998533642572	-3.60506625299005	0.000312073304631267	0.00113137798587274
ENSMUSG00000005640	23920	Insrr	2.81308388633046	-0.149344729948142	0.912041286190019	-0.163747773493915	0.869929707288885	0.919703999551747
ENSMUSG00000005649	29865	Cabp5	0.120743067492745	1.6368538076386	4.30541918999169	0.380184538463432	0.703808435622139	NA
ENSMUSG00000005656	72183	Snx6	321.547135726107	0.487773978849133	0.103330749910281	4.72051136058387	2.35252468133831e-06	1.26452906671297e-05
ENSMUSG00000005667	17768	Mthfd2	97.7280500464975	1.07457004850598	0.246635520706183	4.35691519789688	1.31908344716958e-05	6.23710181670118e-05
ENSMUSG00000005672	16590	Kit	35.9007465760748	0.783924361693107	0.263105739507997	2.97950308176108	0.00288716325673169	0.00853697370778065
ENSMUSG00000005674	641376	Tomm40l	153.262992138101	-0.690073055231754	0.153456100616118	-4.4968759955528	6.89591790592229e-06	3.41525840859154e-05
ENSMUSG00000005677	12355	Nr1i3	0.144802404485722	0.606959920202541	4.32794324778021	0.140242116278639	0.888468696717425	NA
ENSMUSG00000005681	11807	Apoa2	3.96368476564708	0.754399826811633	0.842811285214327	0.895099341983525	0.370733985691381	0.508670951574513
ENSMUSG00000005682	103135	Pan2	157.195136807121	0.0786449284056624	0.154553979433252	0.50885087976416	0.610856752537915	0.727205265822511
ENSMUSG00000005683	12974	Cs	7894.51276918734	-0.764262779741259	0.0921577136081643	-8.29298763846017	1.10438822029178e-16	2.57950792079042e-15
ENSMUSG00000005686	11717	Ampd3	173.643875387434	0.484379196388007	0.157363370891484	3.07809367354002	0.00208329417812614	0.00634956503317929
ENSMUSG00000005687	68183	Bcas2	550.399223137769	0.188439461728136	0.126281253599276	1.4922203918414	0.135641378244709	0.232316340110871
ENSMUSG00000005696	20400	Sh2d1a	0.844906758529479	3.85639687752042	1.89027351653036	2.04012638583591	0.0413377393033711	0.0869775376970826
ENSMUSG00000005698	13018	Ctcf	390.728524876654	-0.34692277417195	0.122735835472381	-2.8265809479092	0.00470478512449017	0.0131897571285603
ENSMUSG00000005699	56513	Pard6a	66.7715269597931	-0.0497481962090198	0.184800881149049	-0.269198912362847	0.787776617198248	0.862561635850853
ENSMUSG00000005705	11604	Agrp	3.10061296105841	0.14355445335847	0.787130354366557	0.182376975506167	0.855286893661783	0.910532265529764
ENSMUSG00000005716	19293	Pvalb	129955.868375107	0.116806642881654	0.161728315121136	0.722239904584206	0.470146993284457	0.605620714700587
ENSMUSG00000005718	83383	Tfap4	68.2667205824864	-0.0784399569654307	0.178287807625873	-0.439962541521811	0.659964237587946	0.766545703039712
ENSMUSG00000005732	19385	Ranbp1	136.947047955314	1.20552094846169	0.187317356171087	6.43571409026625	1.22894172666043e-10	1.27165186777692e-09
ENSMUSG00000005763	12503	Cd247	17.6611130416428	0.525242748241815	0.316929400181418	1.65728628502485	0.0974616088116847	0.177188107399753
ENSMUSG00000005774	53970	Rfx5	29.8509162347129	-0.126714019265969	0.270258564333562	-0.46886217862674	0.63916815201294	0.750318120093461
ENSMUSG00000005779	19172	Psmb4	1584.44380585785	0.260830769329963	0.115806579012217	2.25229664458396	0.0243035320705366	0.0550867306809632
ENSMUSG00000005800	17394	Mmp8	4.362280003348	3.87587932569964	0.941631660259752	4.11613106193824	3.85285270755006e-05	0.000166345961266515
ENSMUSG00000005802	22785	Slc30a4	245.539512026345	-0.249877713902641	0.117225601875624	-2.13159676644493	0.0330400098112001	0.0717968389137948
ENSMUSG00000005803	59010	Sqor	390.270380089428	-0.510275049874453	0.124479840642348	-4.09925854050988	4.14475830206065e-05	0.000177439181966988
ENSMUSG00000005804	18457	Bloc1s6	236.614719991227	0.119806615838055	0.0965925922581397	1.24032923267943	0.214853644212106	0.334942374816969
ENSMUSG00000005813	75624	Metap1	626.783009018086	-0.392504430082056	0.120617588872433	-3.25412266777423	0.00113743153181309	0.00367305469188664
ENSMUSG00000005823	78308	Gpr108	349.676078281889	0.0490991036781448	0.0850662394277965	0.577186719530722	0.563813327438283	0.687898807594492
ENSMUSG00000005824	50930	Tnfsf14	3.52942515796866	5.02374857295998	1.16104310424329	4.32692684242261	1.5120415372676e-05	7.06331894940975e-05
ENSMUSG00000005836	14465	Gata6	8.62560969488025	0.0112014457362041	0.46266556954604	0.0242106749961851	0.98068456321141	0.988185299972625
ENSMUSG00000005846	66409	Rsl1d1	594.897142835922	0.0569519341762178	0.0726135387209069	0.784315641124652	0.432854923924787	0.569632219204279
ENSMUSG00000005864	12789	Cnga2	0.15393356017702	-2.07906744693154	4.06136447421847	-0.51191353549514	0.60871152465703	NA
ENSMUSG00000005871	11789	Apc	312.309514624905	-0.485843058030303	0.103006446913538	-4.71662767319905	2.39785918830825e-06	1.28649581205029e-05
ENSMUSG00000005873	13476	Reep5	2044.55171719078	0.352580390547671	0.062249051210349	5.66402834568914	1.47859965281256e-08	1.1212992175223e-07
ENSMUSG00000005881	66366	Ergic3	589.105742327452	0.667864790318799	0.100217800763665	6.66413336981687	2.66231619790661e-11	3.0404706856206e-10
ENSMUSG00000005882	56046	Uqcc1	1187.19891331817	-0.924028423329155	0.0901017497316685	-10.255388225878	1.11925325801014e-24	8.57824635806476e-23
ENSMUSG00000005883	26972	Spo11	0.750799402935501	-1.01796117010439	1.6960826624891	-0.600183701312336	0.548383814653913	0.674751101939869
ENSMUSG00000005886	17978	Ncoa2	202.500088494202	-0.264603480627852	0.141771034474181	-1.86641426162437	0.0619834293277369	0.122011717281171
ENSMUSG00000005891	19110	Prl4a1	0	NA	NA	NA	NA	NA
ENSMUSG00000005892	22044	Trh	0	NA	NA	NA	NA	NA
ENSMUSG00000005893	22026	Nr2c2	54.79781578773	-0.79211788046276	0.248227041193314	-3.19110229350828	0.00141731089969068	0.00448770590717327
ENSMUSG00000005897	22025	Nr2c1	83.9719216587619	-0.303018186265679	0.180139560062284	-1.68213015597967	0.0925436039340039	0.169659065438628
ENSMUSG00000005899	77626	Smpd4	164.960433685336	-0.147791008756026	0.121164825652201	-1.21975175518556	0.222558995358798	0.344496561801525
ENSMUSG00000005907	71382	Pex1	55.5828976469959	-0.304925318885257	0.191194657597621	-1.59484225509579	0.11074751525283	0.196863468167488
ENSMUSG00000005917	18423	Otx1	0.06689489651356	0	4.32794324778021	0	1	NA
ENSMUSG00000005936	66989	Kctd20	441.946330388824	-0.264486644248989	0.100300370315626	-2.63694583994756	0.00836561870387526	0.0218600088935024
ENSMUSG00000005947	16407	Itgae	8.1672643055782	-0.0171795253864945	0.438218661706343	-0.0392030894339383	0.968728470519595	0.980500114499798
ENSMUSG00000005949	83429	Ctns	90.5598764674993	0.332899397843002	0.161251549687574	2.06447254918169	0.0389729340064718	0.0827097737174618
ENSMUSG00000005950	94045	P2rx5	166.17912804224	-0.356093491988773	0.134888216760029	-2.6399154836651	0.0082926704802983	0.021694400891807
ENSMUSG00000005951	74637	Shpk	19.050203947366	-0.232786990645007	0.309997843446352	-0.750931000219338	0.452694182519094	0.588821628581704
ENSMUSG00000005952	193034	Trpv1	5.51093027144254	-0.132945902445772	0.50456494433175	-0.263486205173939	0.792175854694828	0.865749767029042
ENSMUSG00000005958	13845	Ephb3	71.6260038607852	1.68931324668582	0.244341544720598	6.9137372795835	4.72049054090853e-12	5.97306514959782e-11
ENSMUSG00000005968	22156	Tuft1	8.91282647621609	1.02668250509064	0.412653228251743	2.48800308540008	0.012846261854322	0.0318267084805271
ENSMUSG00000005973	19672	Rcn1	260.955269768388	1.26163979485401	0.147402431878069	8.55915183202432	1.13700894168029e-17	3.11395234204479e-16
ENSMUSG00000005980	13419	Dnase1	8.72191796513926	-1.04840849319881	0.452398890541127	-2.31744267088007	0.0204796301751704	0.0475749574093477
ENSMUSG00000005981	68015	Trap1	1214.65578181628	-0.548941900725439	0.0818720562696443	-6.70487496878676	2.01578890448178e-11	2.34203835598092e-10
ENSMUSG00000005982	74763	Naa60	197.869253704153	-0.787651300044229	0.14625977719372	-5.38528989416546	7.23279792435059e-08	4.9809192948799e-07
ENSMUSG00000005983	73261	1700037C18Rik	22.7311953503556	0.532498827366637	0.297844212920342	1.78784345730784	0.0738012674045088	0.14063930414566
ENSMUSG00000005983	105246059	1700037C18Rik	22.7311953503556	0.532498827366637	0.297844212920342	1.78784345730784	0.0738012674045088	0.14063930414566
ENSMUSG00000005986	68423	Ankrd13d	11.8030595499978	1.56823108354104	0.444814194794665	3.52558686726481	0.000422545573493036	0.00148929028237439
ENSMUSG00000005994	22178	Tyrp1	0.181186003313036	-0.114350417201965	3.90032695020908	-0.0293181619545601	0.976610841983136	NA
ENSMUSG00000006005	108989	Tpr	691.685350003978	-0.44885554566714	0.114622997772393	-3.91592921481981	9.00566702696809e-05	0.000362619317344378
ENSMUSG00000006007	20028	Pdc	0.124450811557687	0.606959920202541	4.32794324778021	0.140242116278639	0.888468696717425	NA
ENSMUSG00000006010	226499	Odr4	289.580115361185	-0.310107774700532	0.104588763538271	-2.96501999076656	0.00302663261280477	0.00891536366744202
ENSMUSG00000006014	96875	Prg4	405.132338565231	0.602257983811068	0.341312060670276	1.76453765691239	0.0776415011624388	0.146592332234103
ENSMUSG00000006019	71723	Dhx34	96.7966598257452	0.236066474697544	0.169988206256943	1.38872266432838	0.164917099586336	0.272032240291471
ENSMUSG00000006021	70394	Kptn	155.302605835548	-0.255420005604531	0.137372718749709	-1.85932118057518	0.0629816265162356	0.123639549927169
ENSMUSG00000006024	108124	Napa	1644.68565301291	0.0976549040907905	0.0714998393485035	1.36580592321057	0.171999886775621	0.281252674433048
ENSMUSG00000006050	24068	Sra1	631.946991674483	-0.156133946255828	0.092674277429948	-1.68476033032844	0.0920348214181601	0.168958973198381
ENSMUSG00000006056	76815	Calcoco2	0	NA	NA	NA	NA	NA
ENSMUSG00000006057	11951	Atp5g1	7308.8230176795	-0.648541765918844	0.121045689663156	-5.35782618714963	8.42292107081721e-08	5.73777695249958e-07
ENSMUSG00000006058	27681	Snf8	337.332290060488	0.0604520365270025	0.13228601601494	0.45697979535626	0.647685568032961	0.756922425489354
ENSMUSG00000006095	66411	Tbcb	312.012117765875	0.406190393629806	0.118427591106172	3.42986283716309	0.000603886434164538	0.0020669958997206
ENSMUSG00000006127	19062	Inpp5k	361.163503839303	-0.0311235110427497	0.112470788004118	-0.276725286583838	0.78199105392515	0.858669372662703
ENSMUSG00000006134	12929	Crkl	359.421006400407	-0.500317467508632	0.129937175188471	-3.85045670558048	0.000117897770655061	0.000464062753972673
ENSMUSG00000006143	69665	Upk3bl	0	NA	NA	NA	NA	NA
ENSMUSG00000006154	67425	Eps8l1	34.2012038428091	-0.514598287634337	0.411451560714699	-1.25068984242148	0.211047657797166	0.33031195265296
ENSMUSG00000006169	216705	Clint1	509.938796133774	-0.162309508074702	0.111910875507593	-1.45034615571111	0.146962014068706	0.247664502952983
ENSMUSG00000006179	54373	Prss16	0.335370688351198	2.78617434989426	2.77641978293948	1.00351336170946	0.315613233316673	NA
ENSMUSG00000006191	68916	Cdkal1	146.838784577235	-0.958316279465907	0.162910626023588	-5.88246637347737	4.04197476065023e-09	3.35284301442085e-08
ENSMUSG00000006200	19202	Rhox6	0	NA	NA	NA	NA	NA
ENSMUSG00000006204	71395	Cdcp3	0.637008578681793	1.99028232246466	1.87523480750625	1.0613509916187	0.288530420253678	NA
ENSMUSG00000006205	56213	Htra1	575.831324183641	-0.0139094131654509	0.153751608939429	-0.0904667812024693	0.927916290441382	0.956628921155224
ENSMUSG00000006215	22642	Zbtb17	455.501570398624	-0.620319068477791	0.0886730169927005	-6.9955786948002	2.64166254224859e-12	3.45317716369032e-11
ENSMUSG00000006216	56365	Clcnkb	0.932318439862986	2.93036036886212	1.51724961796393	1.93136339213222	0.053438128972794	0.107844650150642
ENSMUSG00000006218	277743	Fam131c	0.861480819271064	-1.05205120475879	1.37151824551188	-0.767070513426627	0.44303959228995	0.579779852093003
ENSMUSG00000006219	74202	Fblim1	81.9755646333667	1.71231566503016	0.318399053334427	5.37789182190705	7.53630731006717e-08	5.17578693182364e-07
ENSMUSG00000006221	29818	Hspb7	4787.33105476554	-0.298686168211624	0.227218614893452	-1.3145321229587	0.188667195315245	0.302735603882296
ENSMUSG00000006235	13857	Epor	11.8499426259747	1.53297597435532	0.445288365085051	3.44265894767431	0.000576025250330546	0.00198017309146695
ENSMUSG00000006241	67119	Ccdc159	8.09495714847989	0.447593218754748	0.535350240414236	0.836075497805726	0.403112431580899	0.541009430863501
ENSMUSG00000006262	68473	Mob1b	370.620520881808	-0.14583652789731	0.0962517351559494	-1.51515739078389	0.129732550677191	0.223735371663257
ENSMUSG00000006269	110935	Atp6v1b1	0.23887842698567	1.39981023939224	4.27733554842175	0.327262199457029	0.743469580110899	NA
ENSMUSG00000006270	22326	Vax1	0.112604777459982	-0.835687828851884	4.32794324778021	-0.193091217007179	0.846887531034479	NA
ENSMUSG00000006273	11966	Atp6v1b2	849.974466606118	0.495674700003973	0.116943277990353	4.23859078112093	2.24927227814115e-05	0.000101861562144442
ENSMUSG00000006276	13859	Eps15l1	257.893344687259	-0.0201179869000746	0.117000321885935	-0.171948132926403	0.86347830547148	0.915714336659941
ENSMUSG00000006281	21745	Tep1	225.594086990051	0.897475318263028	0.15687769441079	5.72085994528295	1.05986238260238e-08	8.21047119374183e-08
ENSMUSG00000006288	219022	Ttc5	112.045053245871	0.754836350355039	0.149285036140837	5.05634301915512	4.27372347158537e-07	2.59944007292536e-06
ENSMUSG00000006289	66246	Osgep	365.091460636254	-0.0846869388647486	0.119375594955437	-0.709415847488445	0.478066456278233	0.613157645660495
ENSMUSG00000006299	227290	Aamp	757.134026914156	0.213989755245118	0.0945008709067505	2.26442098566768	0.0235482344564785	0.053628037728984
ENSMUSG00000006301	69660	Tmbim1	730.732168686977	0.52997553755652	0.0713019931919183	7.43282920759345	1.0629911892984e-13	1.66227411968098e-12
ENSMUSG00000006304	76709	Arpc2	1122.53438306437	0.914744707671121	0.102752928993448	8.90237112101638	5.46661330390837e-19	1.80049876416472e-17
ENSMUSG00000006307	75410	Kmt2b	269.311058201753	-0.204404284693356	0.152800542665173	-1.33771962538943	0.180987850988258	0.292978807610851
ENSMUSG00000006310	58206	Zbtb32	6.31399175075184	0.670667513295404	0.599227566139113	1.11922006128087	0.263046269013075	0.391973360279186
ENSMUSG00000006311	14008	Etv2	0	NA	NA	NA	NA	NA
ENSMUSG00000006313	109637	Upk1a	4.85576150649926	0.430172151937997	0.707516283362864	0.608003182475695	0.543185363162695	0.670154692451368
ENSMUSG00000006315	69804	Tmem147	1023.69625010511	-0.366986882614828	0.106286999704017	-3.45279181496134	0.000554817012659949	0.00191366299181838
ENSMUSG00000006333	76846	Rps9	3312.01113734711	0.816981229227582	0.125449488472117	6.51243172991628	7.39438248310115e-11	7.90708582025835e-10
ENSMUSG00000006335	69714	Tfpt	137.763069004336	0.0323879724767682	0.141149786883421	0.229458174836057	0.818512825059627	0.883562524218224
ENSMUSG00000006342	71733	Susd2	63.6106667642682	0.0692108543602791	0.182182693952606	0.379898072965613	0.704021077845277	0.800140337018857
ENSMUSG00000006344	23887	Ggt5	108.06611099995	0.517316762954533	0.158545607529149	3.2628892784647	0.00110282597047183	0.00357275202295093
ENSMUSG00000006345	14598	Ggt1	0.042418234944148	-0.835681072974956	4.32794324778021	-0.193089656016995	0.846888753521154	NA
ENSMUSG00000006356	68337	Crip2	784.696141934423	0.708412575443231	0.115936842902137	6.11033177814932	9.94242283121309e-10	9.04235881986826e-09
ENSMUSG00000006360	12925	Crip1	732.10819012185	1.48979800834518	0.154125658892082	9.66612580315604	4.1997653178211e-22	2.24548194990239e-20
ENSMUSG00000006362	12398	Cbfa2t3	480.122830205912	-0.818235331765475	0.183210643860618	-4.46609058580661	7.96618902887071e-06	3.91072752691054e-05
ENSMUSG00000006369	14114	Fbln1	209.716501600734	0.13136456011316	0.186180764458629	0.705575361102086	0.480452251146845	0.615317112038056
ENSMUSG00000006373	53328	Pgrmc1	245.636149748835	0.50637922209255	0.137051623083441	3.69480645832449	0.00022005434067678	0.000823396202899917
ENSMUSG00000006378	26912	Gcat	9.94328596478127	-0.595836615490688	0.499602246336583	-1.19262197049705	0.233017457373295	0.356991174908681
ENSMUSG00000006386	21687	Tek	315.422552166181	-0.741469473056973	0.134240233746994	-5.5234518918854	3.32403337693179e-08	2.40152475909728e-07
ENSMUSG00000006389	17480	Mpl	0.194480427131943	-1.59306202905449	3.80974810206668	-0.418154163050912	0.675834406426403	NA
ENSMUSG00000006390	54325	Elovl1	184.764661789985	1.16832823891887	0.154172964868061	7.57803574653128	3.50825750441102e-14	5.88808880236577e-13
ENSMUSG00000006392	80509	Med8	277.488884614098	-0.204399052826529	0.117807709397337	-1.73502272365844	0.082736780378826	0.154719851757677
ENSMUSG00000006395	NA	Hyi	60.9264400047403	1.44267933818488	0.203759434234211	7.08030694925563	1.438355097062e-12	1.96030586149281e-11
ENSMUSG00000006398	107995	Cdc20	40.8352100775182	3.51153375239946	0.707095391120073	4.96613865186849	6.82991325930093e-07	4.0137189961437e-06
ENSMUSG00000006403	240913	Adamts4	49.1690348053562	1.50101330947132	0.281274043011354	5.33648001572164	9.47683117514283e-08	6.42315016803477e-07
ENSMUSG00000006411	71740	Nectin4	11.4484803686437	3.79086077475486	0.711663050580805	5.32676351773644	9.99781927933784e-08	6.74225638051565e-07
ENSMUSG00000006412	18637	Pfdn2	657.823066999666	0.0658695823413213	0.163647790236215	0.402508229694045	0.687310032949267	0.787926311446191
ENSMUSG00000006418	81018	Rnf114	593.617915786686	-0.471705847518266	0.11301451738878	-4.17385180609633	2.99492606801247e-05	0.000132126777747707
ENSMUSG00000006423	77644	Steep1	157.109863191203	-0.184026671499236	0.137396800049212	-1.33938105860779	0.18044665248928	0.29224354605708
ENSMUSG00000006435	18011	Neurl1a	2523.84179929803	-0.648977555781758	0.0989365054467694	-6.55953586445324	5.39755113617381e-11	5.9033336002092e-10
ENSMUSG00000006442	20810	Srm	142.410316055461	0.903299690816314	0.184722063529522	4.89004763998833	1.00811576280627e-06	5.7598042604552e-06
ENSMUSG00000006445	13836	Epha2	68.1560789557389	-0.0949765533182067	0.20532290563593	-0.462571640626474	0.643671440189806	0.753848423677062
ENSMUSG00000006456	56275	Rbm14	88.8712030933298	0.526943269206183	0.176627138483289	2.98336526159619	0.00285097532384359	0.00843863577132381
ENSMUSG00000006457	11474	Actn3	74831.1792924751	-0.815494444561474	0.131816521287629	-6.18658751266872	6.14805602494146e-10	5.7801476350161e-09
ENSMUSG00000006462	NA	A530013C23Rik	39.8933586280776	-0.00728233036794951	0.277710947227763	-0.0262226982430655	0.979079711526061	0.986913524290184
ENSMUSG00000006463	70605	Zdhhc24	49.6397983359448	0.863215992702903	0.207147754878667	4.16715109081687	3.08430079028288e-05	0.000135861562564974
ENSMUSG00000006464	52028	Bbs1	34.7001344931515	0.0505734107749872	0.250722049049706	0.201711061977485	0.840142614151747	0.898920042117775
ENSMUSG00000006469	142681	Slc34a3	0	NA	NA	NA	NA	NA
ENSMUSG00000006471	78797	Ndor1	21.187254813268	-0.024796292585978	0.30862984904626	-0.0803431445876168	0.935964344681687	0.960706205757009
ENSMUSG00000006476	56876	Nsmf	223.464843060046	0.663668399771686	0.13056086027978	5.08321098949182	3.71107073471942e-07	2.28339599510804e-06
ENSMUSG00000006488	19113	Prl7a1	0.0579491280617172	0.606966676079468	4.32794324778021	0.140243677268823	0.888467463415622	NA
ENSMUSG00000006490	67310	Prl8a9	0	NA	NA	NA	NA	NA
ENSMUSG00000006494	228026	Pdk1	606.405278449264	-1.25630896204514	0.13248186142663	-9.48287522923205	2.47371177218133e-21	1.18720495694902e-19
ENSMUSG00000006498	19205	Ptbp1	236.614056389026	0.834564576644994	0.111112064933909	7.51101671219414	5.86699011961994e-14	9.47603524368422e-13
ENSMUSG00000006517	192156	Mvd	112.832566886057	0.131825420915903	0.17710293391943	0.74434351819307	0.45666867991818	0.59261382740686
ENSMUSG00000006519	13057	Cyba	433.348831307614	3.11452707246905	0.256745695178524	12.1307859526268	7.2549763263121e-34	2.08912225442104e-31
ENSMUSG00000006522	16426	Itih3	1.68621997618358	0.113241591750266	1.07033448605668	0.105800189777562	0.915740886215348	0.949418220524779
ENSMUSG00000006526	69179	Stimate	155.291226450333	-0.234967852862345	0.147454681321355	-1.59349198517657	0.111049864909927	0.197253447919404
ENSMUSG00000006527	54650	Sfmbt1	133.762898935987	0.189330298707705	0.127422464932652	1.48584708989717	0.137319571313996	0.234631736795475
ENSMUSG00000006529	16424	Itih1	0.434817658629724	-0.83569217316346	2.64563389396733	-0.315875970242532	0.752096651778771	NA
ENSMUSG00000006538	16147	Ihh	1.70820299971131	1.58038243323397	1.12927666566896	1.39946434853304	0.161673782092378	0.267734014593827
ENSMUSG00000006542	241113	Prkag3	1800.63345703041	-0.0181992884548661	0.164908391724874	-0.110359989958722	0.912123882642062	0.947250415130625
ENSMUSG00000006546	12958	Cryba2	0	NA	NA	NA	NA	NA
ENSMUSG00000006567	11979	Atp7b	0.276728343799801	-0.114347776940002	2.99349855724564	-0.0381987078842005	0.969529251104662	NA
ENSMUSG00000006570	13215	Defb2	0	NA	NA	NA	NA	NA
ENSMUSG00000006574	20533	Slc4a1	5.73528761704674	-1.00544995331818	0.682164657741228	-1.4739109420406	0.140505571250696	0.239062277344499
ENSMUSG00000006575	51799	Rundc3a	15.4092784830627	1.16406589888517	0.412888745770945	2.81932096916719	0.00481253688576833	0.01344695120688
ENSMUSG00000006576	20536	Slc4a3	152.603935294414	0.870757158625852	0.217147084891816	4.00998778804545	6.07218882644928e-05	0.000252521374406309
ENSMUSG00000006585	67177	Cdt1	32.9459343301367	2.71935167556963	0.334554983453552	8.12826533772787	4.35477166078408e-16	9.4284782348469e-15
ENSMUSG00000006586	12395	Runx1t1	35.400649079904	0.598989150625128	0.231803974621529	2.58403313231841	0.00976524129224091	0.0250493724519853
ENSMUSG00000006587	30927	Snai3	108.845579519219	-0.361073603779289	0.250527482888614	-1.44125346894506	0.149513087676111	0.250935496110522
ENSMUSG00000006589	11821	Aprt	289.823083771559	0.955665168857802	0.165763487579346	5.76523324173154	8.15449872306103e-09	6.44083976335192e-08
ENSMUSG00000006599	14884	Gtf2h1	297.896683270019	-0.0113710464262073	0.0885044151211489	-0.128479990638231	0.897769132137995	0.938411760864217
ENSMUSG00000006611	15216	Hfe	349.789818914662	0.475953938738724	0.108886617133347	4.37109675430409	1.236239928344e-05	5.88125754912202e-05
ENSMUSG00000006638	57742	Abhd1	0.784355836261393	-0.0679124455751582	1.45770743890099	-0.0465885291951033	0.962841174480424	0.977137284327843
ENSMUSG00000006641	330064	Slc5a6	64.2032223140198	-0.0919917258929642	0.179194976664766	-0.513361075210608	0.607698768536108	0.724644112481208
ENSMUSG00000006642	69852	Tcf23	2.53449264335808	-0.246428926185813	0.845840019208357	-0.291342240364144	0.770789584742437	0.850510196134709
ENSMUSG00000006649	54631	Nphs1	0	NA	NA	NA	NA	NA
ENSMUSG00000006651	11803	Aplp1	25.0032862824548	-0.0200916267006093	0.302142660260362	-0.0664971529783181	0.946982024288866	0.967456050619178
ENSMUSG00000006673	69232	Qrich1	379.016965251386	-0.181910281197736	0.120011487061911	-1.5157739117414	0.129576530878454	0.223523674190585
ENSMUSG00000006675	74443	P4htm	35.5295645025842	-0.0340347219325898	0.222097940459778	-0.153241952006095	0.878207475432762	0.925354316900062
ENSMUSG00000006676	71472	Usp19	1863.01065039233	-0.448738461929661	0.0879694854688095	-5.10106953039717	3.37739448259468e-07	2.09021002719254e-06
ENSMUSG00000006678	18968	Pola1	21.8321747142216	1.1024128686005	0.317868645614871	3.46813969798136	0.000524074773907364	0.00181726736928449
ENSMUSG00000006699	12540	Cdc42	2583.62227851856	0.488286736067091	0.0713898644019668	6.83972073847556	7.93477066833497e-12	9.72878177382165e-11
ENSMUSG00000006705	18771	Pknox1	128.739520983417	-0.172070350715878	0.133199961815082	-1.29181982014949	0.196419549788492	0.312713023538262
ENSMUSG00000006711	210108	D130043K22Rik	0.543249821453286	0.326346221727754	1.72163020418668	0.189556515060052	0.849656665256023	NA
ENSMUSG00000006715	57441	Gmnn	68.2353037413001	-0.377431603879801	0.22223775182272	-1.69832353317217	0.0894467154720159	0.165304615730212
ENSMUSG00000006717	66834	Acot13	875.36132252167	-0.760929351949822	0.116834905627607	-6.51285973025191	7.37333593661213e-11	7.88876499332753e-10
ENSMUSG00000006720	193452	Zfp184	2.46254904001942	-0.726003231712036	0.997431979490566	-0.727872423022609	0.466691685742148	0.602142503837937
ENSMUSG00000006724	13115	Cyp27b1	1.86489737854317	-0.0771653199446379	0.881036306252224	-0.0875847219882297	0.930206745596198	0.957814536727757
ENSMUSG00000006728	12567	Cdk4	452.833395921718	1.08598593619577	0.113220852668995	9.59174843322093	8.66047671829693e-22	4.45329666353855e-20
ENSMUSG00000006731	14421	B4galnt1	46.2002792853683	2.77584757416979	0.290665725466091	9.5499652383116	1.29739814361229e-21	6.5542993435571e-20
ENSMUSG00000006732	17299	Mettl1	205.927594717253	0.228702801807344	0.161279723181192	1.41805056020839	0.156176003962124	0.260297644440593
ENSMUSG00000006736	67125	Tspan31	199.348963065923	0.355819874648844	0.123324335837344	2.88523649637282	0.00391119727002636	0.011204263633066
ENSMUSG00000006740	16573	Kif5b	1645.66683054797	-0.196595916353404	0.0802088578688166	-2.45104994107934	0.0142440189028688	0.0349417900724262
ENSMUSG00000006763	78935	Saal1	55.5399884375437	0.542033606074069	0.197447591464273	2.74520242082642	0.00604735843098092	0.016459168767659
ENSMUSG00000006764	216343	Tph2	0.977299964804353	-1.74890352182102	1.56672992879505	-1.11627632157769	0.264303873874831	0.393353011347828
ENSMUSG00000006777	94179	Krt23	0	NA	NA	NA	NA	NA
ENSMUSG00000006782	12799	Cnp	206.960879155179	0.159096005980967	0.134042959707917	1.18690311171613	0.235265839793161	0.359752202451126
ENSMUSG00000006784	74407	Odad4	6.79085697375706	-0.692738721358404	0.55219830418756	-1.25451077286016	0.209656412572169	0.328644864158738
ENSMUSG00000006800	72043	Sulf2	298.614961220781	0.926687748677396	0.156024876004498	5.93935898177341	2.8613868566246e-09	2.41832179744159e-08
ENSMUSG00000006818	20656	Sod2	2944.87073462657	-0.852725364062028	0.105181189248736	-8.10720405571262	5.17978318969375e-16	1.10837462584561e-14
ENSMUSG00000006850	71983	Tmco6	94.3274940498871	-0.0796761641306718	0.181297009236091	-0.439478645932404	0.660314751605358	0.766835538866693
ENSMUSG00000006906	70527	Stambp	98.4763135921114	0.312133003912385	0.139512005412345	2.23732002840785	0.0252654311172356	0.0569850391664001
ENSMUSG00000006920	14055	Ezh1	367.173659172108	-0.331079442070401	0.0937815035512818	-3.53032772490536	0.000415045210934819	0.00146464746442807
ENSMUSG00000006930	15114	Hap1	7.19334288564091	1.77446963484897	0.53976612830188	3.28747867234926	0.00101088845857114	0.00330301818477934
ENSMUSG00000006931	66180	P3h4	107.434600885501	0.721578490370883	0.162919372856324	4.42905271313089	9.46478896228997e-06	4.58059426441486e-05
ENSMUSG00000006932	12387	Ctnnb1	1418.29551931696	-0.283665787343112	0.128390716593816	-2.20939484464856	0.0271471893051505	0.0606153120371074
ENSMUSG00000006941	68969	Eif1b	364.761002676619	0.185772429703908	0.110195962188718	1.68583699451491	0.0918272001135435	0.168652471315599
ENSMUSG00000006948	56640	Klk4	0	NA	NA	NA	NA	NA
ENSMUSG00000006958	12667	Chrd	56.2199265208938	-0.0621808209054496	0.201860857747133	-0.308038029756825	0.758053394798576	0.841692314583833
ENSMUSG00000006998	21762	Psmd2	2637.19893308749	-0.284507092479878	0.0820435911020866	-3.4677552342372	0.000524825081819214	0.00181955610151873
ENSMUSG00000007021	20974	Syngr3	1.17233021709518	0.504908797562483	1.6322537856109	0.309332287670886	0.757068772522902	0.840876969789736
ENSMUSG00000007029	22321	Vars	549.343593056093	-0.129607506647401	0.0961485722404256	-1.34799200474146	0.177660954160432	0.288659668951461
ENSMUSG00000007030	27762	Vwa7	114.820123890893	-1.24816464104689	0.198064431819271	-6.30181113076279	2.94187522297942e-10	2.895477483867e-09
ENSMUSG00000007033	15482	Hspa1l	53.1181221181505	-1.09310440750793	0.240692225577153	-4.54150276306925	5.58546538069151e-06	2.81535948183543e-05
ENSMUSG00000007034	70129	Slc44a4	6.40948208407296	2.59513181362844	0.810233553181909	3.20294290879089	0.00136030945405328	0.00432420086190695
ENSMUSG00000007035	17687	Msh5	9.94999299648331	0.497091284880334	0.454115871800312	1.09463534694273	0.273676423557624	0.403940047229723
ENSMUSG00000007036	193742	Abhd16a	805.775473096913	-0.706704755013583	0.130149685052712	-5.42993826475541	5.63735495605126e-08	3.94967549006344e-07
ENSMUSG00000007038	18010	Neu1	210.249637074048	0.243610916204973	0.108923080723425	2.23654081932868	0.0253163665747442	0.0570807607435256
ENSMUSG00000007039	51793	Ddah2	233.048113265137	1.11728263337621	0.17682671259244	6.31851724773841	2.64084826122095e-10	2.61837572068031e-09
ENSMUSG00000007041	114584	Clic1	434.765973682708	2.18364600875352	0.184686084001552	11.8235546579415	2.94935327304197e-32	6.99413104996554e-30
ENSMUSG00000007050	27756	Lsm2	129.883034117611	0.202792454522911	0.145711743281259	1.39173720632435	0.16400199116351	0.270833044067088
ENSMUSG00000007080	18973	Pole	19.3695823984884	0.498911433196988	0.385567168702874	1.293967624047	0.19567660417449	0.311712107898424
ENSMUSG00000007097	98660	Atp1a2	19242.5621216173	-0.666010925102067	0.108877160516208	-6.1170857317033	9.53021016657627e-10	8.68446864049176e-09
ENSMUSG00000007107	27222	Atp1a4	5.11211856123497	-0.385623663998644	0.620903269438381	-0.621068825015929	0.534554340070535	0.662914472302312
ENSMUSG00000007122	12372	Casq1	26555.6731542966	0.123776982603452	0.112892327266878	1.0964162543203	0.272896653904184	0.403016913528217
ENSMUSG00000007207	20907	Stx1a	28.1042150795207	0.919653040844328	0.297955857313275	3.08654123848081	0.00202499855711177	0.00619109599813468
ENSMUSG00000007209	26368	Ceacam9	0	NA	NA	NA	NA	NA
ENSMUSG00000007216	243372	Zfp775	89.2412381390124	-0.779416911487191	0.183058685192327	-4.25774341527862	2.06500762486056e-05	9.41301643923888e-05
ENSMUSG00000007279	56788	Scube2	31.4934217010572	-0.200367099505825	0.274721628603953	-0.729345921993932	0.465790088372006	0.601248771943832
ENSMUSG00000007338	18120	Mrpl49	303.281900712453	-0.115169775280351	0.093238534927456	-1.23521648393509	0.216749946028141	0.33734920152078
ENSMUSG00000007379	329727	Dennd2c	60.4748833407579	0.510273076344799	0.214772268861608	2.37587971226212	0.0175071689938348	0.0416342620822
ENSMUSG00000007411	17169	Mark3	642.359390372428	-0.198864841558718	0.0905355962045815	-2.19653760394251	0.0280534867015808	0.062304333565862
ENSMUSG00000007415	67210	Gatad1	765.234698893589	-0.470530074287289	0.0899745339786517	-5.229591679785	1.69884838320081e-07	1.10250118674111e-06
ENSMUSG00000007440	12943	Pcdha10	0	NA	NA	NA	NA	NA
ENSMUSG00000007457	NA	2310003L06Rik	0	NA	NA	NA	NA	NA
ENSMUSG00000007458	17113	M6pr	478.796213092625	0.744174562366736	0.0968700895922721	7.68219132963518	1.56390025774505e-14	2.76765035077849e-13
ENSMUSG00000007476	241296	Lrrc8a	82.5860093015745	-0.00631845789920132	0.180816691799402	-0.0349439967976575	0.972124397648105	0.9826544046634
ENSMUSG00000007480	17203	Mc5r	10.8093273706795	-0.737011685176838	0.485595298135506	-1.51774880853804	0.129077734592406	0.222834866065358
ENSMUSG00000007564	51792	Ppp2r1a	1424.95772255701	-0.075978401159749	0.0654509342977941	-1.16084517318051	0.245704868614097	0.37180088325372
ENSMUSG00000007570	72775	Fance	99.7001318869379	0.14192871094533	0.136470394571958	1.0399963405286	0.29834160083369	0.432140819776135
ENSMUSG00000007589	28113	Tinf2	155.256372203482	-0.269802327310986	0.118220739966357	-2.28219115687962	0.0224780569643788	0.0515226511520337
ENSMUSG00000007591	71099	Tssk4	2.31450069996588	1.69880715743378	0.928422729002851	1.82977764800991	0.0672831944589207	0.130519425532525
ENSMUSG00000007594	330790	Hapln4	1.8465398316594	-0.0897332001916664	1.00397300272479	-0.0893781007538348	0.9287814268739	0.957095097122959
ENSMUSG00000007603	224907	Dus3l	310.834444321308	-0.0781005709996416	0.109219144604895	-0.715081328298016	0.47455879073951	0.609706262026662
ENSMUSG00000007610	70359	Gtpbp3	154.70268720335	-0.0479738448307703	0.124479950167967	-0.385394151958101	0.699945414665849	0.797294547269698
ENSMUSG00000007613	21812	Tgfbr1	266.09138614337	0.260571673078011	0.121915279430355	2.13731760527083	0.0325721678829145	0.0709326716219192
ENSMUSG00000007617	26556	Homer1	689.991312203375	-1.2832538808176	0.129348034374405	-9.92093839712439	3.37567365433063e-23	2.14648119401711e-21
ENSMUSG00000007646	114714	Rad51c	15.2814245635669	0.949349942081722	0.497187993621776	1.90943859115777	0.0562055364645357	0.112517131643226
ENSMUSG00000007653	14401	Gabrb2	0.366290007193913	-0.114347607636671	2.49637400393294	-0.045805479249712	0.963465291586925	NA
ENSMUSG00000007655	12389	Cav1	1896.48191643032	-0.0937232029239202	0.0915174925744482	-1.02410151641423	0.305787328246921	0.439608813599114
ENSMUSG00000007656	59046	Arpp19	956.256775558745	0.180454179007688	0.096951336231678	1.86128614644845	0.0627037784778124	0.123177084375525
ENSMUSG00000007659	12048	Bcl2l1	220.798564422521	0.560967581930316	0.160110965155831	3.50361751541716	0.000458984088358485	0.00161011873808597
ENSMUSG00000007670	16549	Khsrp	395.482589090478	-0.0762378761303108	0.120764985849134	-0.631291227289599	0.527850121931846	0.657269267839154
ENSMUSG00000007682	13371	Dio2	74.9565375099145	1.37370591033675	0.241826437228443	5.68054479932261	1.34266377333844e-08	1.02515430602966e-07
ENSMUSG00000007721	234388	Ccdc124	1265.73501033614	0.0237845441474166	0.140591662766303	0.169174641507386	0.865659275422162	0.916925591943485
ENSMUSG00000007739	12464	Cct4	1136.02787620013	0.196821776996737	0.0824838081279115	2.38618683428772	0.017024099759405	0.040648516802929
ENSMUSG00000007777	66050	0610009B22Rik	231.391154445847	-0.356386672891894	0.120045822474797	-2.96875530980443	0.00299008592610194	0.00881801931418241
ENSMUSG00000007783	78070	Cpt1c	45.0345812500875	0.654444556089757	0.205496512147391	3.18469909416448	0.00144904595531818	0.00457883983717645
ENSMUSG00000007805	13345	Twist2	5.1019369584442	0.956212237314781	0.648852789669362	1.47369673451206	0.140563262475416	0.239120067661149
ENSMUSG00000007812	72611	Zfp655	142.267075973897	0.00722224162313065	0.138683977538031	0.0520769720579303	0.958467361698333	0.974226497751342
ENSMUSG00000007815	11848	Rhoa	1267.00593168719	0.383973714596566	0.0769077096007548	4.99265569849706	5.95546687087962e-07	3.52967790991828e-06
ENSMUSG00000007817	328365	Zmiz1	381.272864901445	-0.293870639205821	0.119387254688883	-2.46149088503319	0.0138360913416247	0.0340073275421448
ENSMUSG00000007827	232339	Ankrd26	51.823687639579	-0.374855401806393	0.201402761020116	-1.86122275537699	0.0627127261875578	0.123182656574021
ENSMUSG00000007833	69748	Aldh16a1	129.715140997052	0.780026302249739	0.140475239121823	5.55276721453584	2.81182415078662e-08	2.04909397712964e-07
ENSMUSG00000007836	77134	Hnrnpa0	1050.33312559176	0.725786213984937	0.109153708603659	6.64921259451011	2.94665126629913e-11	3.34623377886149e-10
ENSMUSG00000007837	65116	Prrg2	110.975923841991	-0.152984251887269	0.137659334498196	-1.11132494171163	0.266428507271141	0.39581363657609
ENSMUSG00000007850	59013	Hnrnph1	1356.63607759688	0.0947821604029321	0.099581127270399	0.951808470148807	0.341194125596684	0.477185141751542
ENSMUSG00000007867	76411	Ift43	99.6865792603899	0.550075691310346	0.159116581725137	3.45706076228161	0.000546101699005836	0.00188683098163535
ENSMUSG00000007872	15903	Id3	328.424902362489	0.748855695408697	0.184023630067022	4.06934530709974	4.7145429885517e-05	0.000200149627254079
ENSMUSG00000007877	21393	Tcap	23198.8446707492	-0.837655501915955	0.160366892609173	-5.22336928955398	1.75696500652106e-07	1.13629609200189e-06
ENSMUSG00000007880	93760	Arid1a	455.54694586902	-0.22766986997987	0.0972117003454346	-2.34200069714717	0.01918067909632	0.044945936822195
ENSMUSG00000007888	12931	Crlf1	89.471101364446	0.566564840735333	0.166026284988346	3.41250086258993	0.000643697232426691	0.00218876604487598
ENSMUSG00000007891	13033	Ctsd	4299.35635381781	0.609565437420838	0.133619866533632	4.56193718220345	5.06838125568032e-06	2.5714412527246e-05
ENSMUSG00000007892	56040	Rplp1	6474.57496070202	0.74111211323284	0.127196896793025	5.82649523626962	5.6603482058346e-09	4.58031468426367e-08
ENSMUSG00000007907	70977	Cabs1	0	NA	NA	NA	NA	NA
ENSMUSG00000007908	208982	Hmgcll1	4.9936224762184	1.24980522166855	0.594229833362005	2.10323540068236	0.0354451971864726	0.0763729385021623
ENSMUSG00000007944	73032	Ttc9b	0.674251665299178	-0.0588261709067927	1.89233840061676	-0.0310864964150281	0.975200558765721	NA
ENSMUSG00000007946	11859	Phox2a	0.911647038655348	3.24271290656143	1.63565795538962	1.98251284498476	0.0474218711921109	0.0975091969416891
ENSMUSG00000007950	64296	Abhd8	304.873210402094	-0.410262685821162	0.121388279259863	-3.37975534641929	0.000725503795130862	0.00243814271398013
ENSMUSG00000007987	67286	Ift22	102.141369052187	0.770876051213146	0.155379348833309	4.96125165281869	7.00403791627937e-07	4.0993145260872e-06
ENSMUSG00000007989	14365	Fzd3	8.95990993419849	0.767317907360964	0.451219285744856	1.70054324272577	0.0890287897369103	0.164743717499945
ENSMUSG00000008028	69349	1700008O03Rik	0.134748600183182	0.606959920202541	4.32794324778021	0.140242116278639	0.888468696717425	NA
ENSMUSG00000008035	68041	Mid1ip1	273.827059311033	0.259786202192387	0.222916755133283	1.16539558471978	0.24385890371583	0.369722747062804
ENSMUSG00000008036	232910	Ap2s1	572.892152999487	0.875138296302018	0.155542089128989	5.62637612239012	1.84034838903734e-08	1.37647133498425e-07
ENSMUSG00000008090	116701	Fgfrl1	531.193988658252	0.846515552799796	0.142503107359101	5.94033048463018	2.84448054475534e-09	2.40504170891919e-08
ENSMUSG00000008129	74666	Brme1	4.59662164723757	0.415618617632694	0.649745333741201	0.639663874520779	0.522391146306289	0.652527628189618
ENSMUSG00000008136	14200	Fhl2	60.1393366537581	1.19105893975824	0.224621255528269	5.30252106799548	1.14214280549158e-07	7.63081621819485e-07
ENSMUSG00000008140	69683	Emc10	722.157730691115	0.0691987351914611	0.0996237851222774	0.694600542496224	0.48730567218504	0.621252320171643
ENSMUSG00000008153	232370	Clstn3	22.0663177782467	-1.78369862884155	0.493613107164172	-3.61355604815475	0.00030202602988433	0.00109831114637893
ENSMUSG00000008167	68628	Fbxw9	31.6636672260758	1.36164354103726	0.270224052135342	5.03894279682876	4.68110354922468e-07	2.82675267350874e-06
ENSMUSG00000008193	272382	Spib	2.66681583941804	1.67374617743563	0.868312704874863	1.92758457643073	0.0539068188337503	0.108594817832491
ENSMUSG00000008200	55935	Fnbp4	243.074514104381	0.0790345409836216	0.115686485804304	0.683178682748796	0.494493941122759	0.627670484718151
ENSMUSG00000008206	67260	Cers4	98.6079927308656	0.131136744453724	0.190809281379137	0.687266067488384	0.491915077710545	0.625625100726321
ENSMUSG00000008226	74616	Scrn3	436.750981823631	-0.937155141144727	0.163595435698215	-5.72849197867291	1.01327343325477e-08	7.88592764251599e-08
ENSMUSG00000008301	56698	Phax	228.462190787606	0.346918972598956	0.116795135463729	2.97032039238221	0.00297489306295634	0.0087783515546788
ENSMUSG00000008305	21885	Tle1	246.901767055307	-0.609342815807763	0.138527902131972	-4.39870095792871	1.08900759885761e-05	5.23019446513531e-05
ENSMUSG00000008307	77036	1700109H08Rik	16.3861584106608	-0.172461049870046	0.339989751161968	-0.50725367244346	0.611976839907167	0.728151653503853
ENSMUSG00000008318	320100	Relt	267.310558061883	-0.631418929333952	0.121969341823863	-5.17686592296113	2.25644252119584e-07	1.43525124328635e-06
ENSMUSG00000008333	20639	Snrpb2	251.652858420703	0.628740169690671	0.131556380017522	4.77924498687885	1.75954689439933e-06	9.68519572649027e-06
ENSMUSG00000008348	22190	Ubc	3761.48098037677	-0.974744112255762	0.175028343041886	-5.56906438874585	2.5611083640557e-08	1.87656347852675e-07
ENSMUSG00000008373	68988	Prpf31	233.325825764946	0.187338135653223	0.122795485885371	1.52561093188802	0.127106787986315	0.219997554992284
ENSMUSG00000008384	55942	Sertad1	131.607930145214	0.657255698567221	0.168019850995779	3.91177408307387	9.16205988826294e-05	0.000368327964036131
ENSMUSG00000008393	52502	Carhsp1	267.382620306164	0.57724596028849	0.120327419879449	4.79729359165857	1.60823794092127e-06	8.92545489403911e-06
ENSMUSG00000008398	13713	Elk3	309.334303552811	0.519119030008355	0.0965029887906061	5.37930520612941	7.47738512272519e-08	5.13882209065025e-07
ENSMUSG00000008429	80517	Herpud2	525.120752156546	-0.262982388923978	0.114422848250814	-2.2983380762164	0.0215425549346003	0.0497054674913399
ENSMUSG00000008435	108841	Rdh13	184.777929791202	-0.595429304225662	0.141276511300238	-4.21463765452324	2.50179524943034e-05	0.00011231333372554
ENSMUSG00000008438	56622	Adam21	0.517419839455964	-0.582804835974104	1.96522021524298	-0.296559556762979	0.766802791473984	NA
ENSMUSG00000008450	68051	Nutf2	429.397863484785	-0.338821977095821	0.0997935743223498	-3.39522839417866	0.000685713720937005	0.0023179492659613
ENSMUSG00000008461	14343	Fut1	0.370805712138336	1.97123793267458	2.11215144582541	0.933284370574212	0.350673162686763	NA
ENSMUSG00000008475	67771	Arpc5	491.404686550941	1.56446872153011	0.160136880430163	9.76957161478102	1.52093798098502e-22	8.73434384122934e-21
ENSMUSG00000008482	67504	Rnf151	0.1683833597418	1.28050461589397	3.98281505386871	0.321507425922314	0.747825885671457	NA
ENSMUSG00000008489	15569	Elavl2	0.415686683037853	-0.612699691939537	2.44884735199999	-0.25019921778266	0.802433290141893	NA
ENSMUSG00000008496	18987	Pou2f2	63.2695629620324	3.33357235398994	0.319084208238638	10.4473122389586	1.50736584308523e-25	1.30965402151159e-23
ENSMUSG00000008540	56615	Mgst1	353.041812107098	-0.566954625493266	0.194530777655289	-2.914472621386	0.00356290058979052	0.0103200728823692
ENSMUSG00000008575	18028	Nfib	2485.15219103381	-0.125162902971237	0.144738176678186	-0.864753901450113	0.387173877897909	0.525468883435777
ENSMUSG00000008590	57014	Htr3b	0	NA	NA	NA	NA	NA
ENSMUSG00000008601	53868	Rab25	0.163542160103286	1.39785365589271	4.03410767927783	0.346508761546728	0.728960400828467	NA
ENSMUSG00000008604	94232	Ubqln4	1101.66365830092	-1.07402374371389	0.0989850444449387	-10.8503638073459	1.9863314136491e-27	2.21207084557597e-25
ENSMUSG00000008658	268859	Rbfox1	1936.03190964758	-0.655159736580566	0.117312751567861	-5.5847273874706	2.34067083076776e-08	1.72444817016761e-07
ENSMUSG00000008668	20084	Rps18	2548.15216884409	0.860846678007754	0.125183756115073	6.87666439099683	6.12702232023121e-12	7.61420400178178e-11
ENSMUSG00000008682	110954	Rpl10	2818.84923358099	0.660157097656473	0.0952018219215351	6.93429058742775	4.08264683325864e-12	5.22169493769e-11
ENSMUSG00000008683	267019	Rps15a	1948.12089068801	0.94517783122395	0.1389887286012	6.8003919507455	1.04334898249249e-11	1.25631932139195e-10
ENSMUSG00000008690	52683	Ncaph2	615.331875491681	-0.00785668365582694	0.0881574805253693	-0.0891210094594979	0.928985740696071	0.957095097122959
ENSMUSG00000008730	15257	Hipk1	423.006276578361	-0.384513112943173	0.097825606654033	-3.93059778615051	8.47349218314319e-05	0.000343316948614306
ENSMUSG00000008734	64297	Gprc5b	318.689105092575	0.419279346148961	0.146502241997784	2.86193126078782	0.00421068218299066	0.0119592392225648
ENSMUSG00000008763	17156	Man1a2	178.521506283603	-0.127149668339879	0.118621413028686	-1.07189473715956	0.28376731432212	0.415267733032595
ENSMUSG00000008789	73250	Ceacam5	0	NA	NA	NA	NA	NA
ENSMUSG00000008813	219038	Tppp2	1.43494007494512	-1.11035580094921	1.00718923528591	-1.10243017106315	0.270274700793405	0.400229734344156
ENSMUSG00000008822	66204	Acyp1	192.462705301233	-0.577794869466828	0.128194746227631	-4.50716496946651	6.56995525400202e-06	3.26989106308441e-05
ENSMUSG00000008843	57255	Cldn13	0	NA	NA	NA	NA	NA
ENSMUSG00000008845	93671	Cd163	139.187613895002	-0.622086782336705	0.204330391663094	-3.04451421677114	0.00233056414961322	0.00701466052915539
ENSMUSG00000008855	15184	Hdac5	739.434489733983	-0.745404515050375	0.149548853096883	-4.98435460797199	6.21689723090658e-07	3.6695167637887e-06
ENSMUSG00000008859	56044	Rala	560.152951711418	-0.0390602175433302	0.0940004741846857	-0.415532133025067	0.677752397154729	0.780571172462845
ENSMUSG00000008874	403395	Clec3a	0.9549815134476	-2.50334979993297	1.46065011345837	-1.71385999759094	0.0865544412730903	0.160948143241853
ENSMUSG00000008892	22335	Vdac3	3266.47826848141	-0.450449940125886	0.113744316350162	-3.96019734945856	7.48878492009529e-05	0.000306999059659062
ENSMUSG00000008932	242607	Slc1a7	0.528868725512143	1.89233013414516	1.85830947284374	1.01830731737559	0.308531932043285	NA
ENSMUSG00000008958	21427	Vps72	425.60369328066	-0.426284090074854	0.0961352094511974	-4.43421398370444	9.24088088220449e-06	4.48299484819725e-05
ENSMUSG00000008976	14390	Gabpa	254.19219563508	-0.467674427597531	0.122050319754483	-3.83181648797238	0.000127200607099887	0.000497667437366541
ENSMUSG00000008999	12162	Bmp7	7.61948734621467	-1.49331053410775	0.612598178056518	-2.43766727946419	0.0147823729920024	0.0360188723625117
ENSMUSG00000009013	56455	Dynll1	582.734407605417	0.93957793545311	0.123760099106778	7.59192940401946	3.15176732199002e-14	5.32078508453541e-13
ENSMUSG00000009030	67466	Pdcl	177.067511985898	0.327421363244426	0.124170886946325	2.63686095264793	0.00836771234220153	0.0218623431862289
ENSMUSG00000009035	223693	Tmem184b	490.333392034815	-0.201392065106661	0.108677431913366	-1.85311763041295	0.0638655003602728	0.125021114453005
ENSMUSG00000009047	546672	Gm5965	0	NA	NA	NA	NA	NA
ENSMUSG00000009070	71236	Rsph14	0	NA	NA	NA	NA	NA
ENSMUSG00000009073	18016	Nf2	854.214867543011	-0.988707859311438	0.122992384560523	-8.03877299268808	9.07425084638197e-16	1.87753439415616e-14
ENSMUSG00000009075	192650	Cabp7	7.78212859117503	-1.17672682637129	0.502328947047426	-2.3425423386166	0.0191528607690587	0.0448911877351066
ENSMUSG00000009076	67178	Zmat5	93.407277995826	-0.148709462503885	0.153479791999046	-0.968918843106123	0.332585683092644	0.468675168770863
ENSMUSG00000009079	14030	Ewsr1	846.251965731777	0.556838933998962	0.07302626915766	7.62518666805742	2.43681508244955e-14	4.2053837000801e-13
ENSMUSG00000009090	11764	Ap1b1	626.563733653912	0.122899917142131	0.0956048866263378	1.28549827816305	0.19861821804359	0.315264778415988
ENSMUSG00000009092	70377	Derl3	1.93257923363244	0.254101189525604	0.832505598128042	0.305224601608652	0.760195096472987	0.843024083504027
ENSMUSG00000009093	75886	Gstt4	0.222092231079634	-0.763319198217704	3.15616665846425	-0.241850092475512	0.808896322629283	NA
ENSMUSG00000009097	21380	Tbx1	668.097751296332	-0.439519016669397	0.124363189046358	-3.53415685171568	0.000409078236903829	0.00144561536137281
ENSMUSG00000009108	14686	Gnat2	1.96898457330105	1.13934756197231	0.943597895274663	1.2074503002581	0.227258774157597	0.350084456300702
ENSMUSG00000009112	94044	Bcl2l13	623.080402226313	-1.05214805093852	0.129221778808457	-8.14218826455016	3.88197004253901e-16	8.49607710613017e-15
ENSMUSG00000009114	76964	2610028H24Rik	2.55163203640134	-1.00548425177888	0.926106615968818	-1.08571112055713	0.277606819138092	0.408446763019454
ENSMUSG00000009115	76573	Spatc1l	0.233812489033601	-1.54109122933761	3.1080668545774	-0.495835933216161	0.620010170460636	NA
ENSMUSG00000009145	93838	Dqx1	9.07045340469284	-0.130507648522728	0.44520857776521	-0.293138216648544	0.769416506496799	0.849629041385777
ENSMUSG00000009185	20307	Ccl8	100.245075170755	4.86934056423063	0.563598684765831	8.63973017654182	5.63459355134802e-18	1.60873232598473e-16
ENSMUSG00000009207	69605	Lnpk	244.302179397173	0.114345724561702	0.146111590020567	0.782591747482907	0.433866889174037	0.57070313789357
ENSMUSG00000009210	75573	Prr29	83.7731850694785	0.0113942313612819	0.186432545263084	0.0611171796490949	0.951265887345315	0.970181465858101
ENSMUSG00000009214	66139	Mymk	317.397465065153	6.65816900672914	0.74623408708934	8.92235978216848	4.56456602400066e-19	1.5385946044445e-17
ENSMUSG00000009216	109349	Fam163b	0.56671250092007	-0.806642658839167	1.94081927033743	-0.415619666997084	0.677688333067045	NA
ENSMUSG00000009246	56843	Trpm5	2.38236736718877	2.61961989869845	1.08194604932167	2.42121120580904	0.015468886807571	0.037476724925506
ENSMUSG00000009248	17173	Ascl2	0.824317738378178	2.41801064104041	1.64014477158627	1.47426659093137	0.140409826692777	0.238919540490148
ENSMUSG00000009281	71660	Rarres2	136.198551024237	-0.314743821404583	0.169067407910211	-1.86164693298982	0.0626528732153344	0.123101078604298
ENSMUSG00000009291	108705	Pttg1ip	545.200416306963	0.553183457085296	0.0893181700370432	6.19340338987994	5.8878783561971e-10	5.53812244637727e-09
ENSMUSG00000009292	28240	Trpm2	6.03345922071122	3.28427129748565	0.775050182659995	4.2374950305978	2.26027420759847e-05	0.00010231382708862
ENSMUSG00000009293	22213	Ube2g2	939.094669284283	0.141466262984276	0.109865261710601	1.28763415097409	0.197873345506502	0.314329972840614
ENSMUSG00000009350	17523	Mpo	0.132937415214957	0.558524334605758	4.30346697394374	0.129784738209324	0.896736737924659	NA
ENSMUSG00000009356	76113	Lpo	0	NA	NA	NA	NA	NA
ENSMUSG00000009376	17295	Met	155.857924207528	0.0198035393333837	0.123701609723822	0.16009120154214	0.872809231937455	0.921582719745227
ENSMUSG00000009378	240638	Slc16a12	14.8440302363485	-0.675927375781861	0.358890031742009	-1.88338297528352	0.0596484858512155	0.118246904927513
ENSMUSG00000009394	20965	Syn2	35.2539426959082	0.880397450960424	0.247260915237318	3.56060095513045	0.00037000701940917	0.00131864064537317
ENSMUSG00000009406	13712	Elk1	102.517698392494	-0.259465945278093	0.145252757138153	-1.78630650729272	0.0740496438669832	0.140985989555755
ENSMUSG00000009418	215690	Nav1	385.972857922132	0.633659805574223	0.134553672190033	4.70934605693474	2.4851282775129e-06	1.32836729487742e-05
ENSMUSG00000009470	238799	Tnpo1	432.316041798668	0.234399266631964	0.0962433013995743	2.43548655567005	0.0148717772405827	0.0361997843060529
ENSMUSG00000009471	17927	Myod1	494.533330198679	0.508811637054778	0.160118102279052	3.17772712649335	0.00148434378435416	0.00467791082883472
ENSMUSG00000009487	18419	Otog	22.0842099324013	0.404157862076053	0.466682188043263	0.866023757561079	0.386477133523734	0.524699911122644
ENSMUSG00000009535	67897	Rnmt	295.277324009763	-0.177454610995826	0.102902854150886	-1.72448677405609	0.084620004557314	0.157715588832222
ENSMUSG00000009545	16535	Kcnq1	9.64610356956731	0.578062835027551	0.425060635902661	1.35995381882393	0.173844538366907	0.283785581459487
ENSMUSG00000009549	20813	Srp14	937.534161261863	0.350969677336685	0.139768200398865	2.51108389701736	0.0120361088070206	0.0300708781882888
ENSMUSG00000009551	70730	6330409D20Rik	2.31423863453595	-0.217922157154881	0.770696542686445	-0.282760003561534	0.777360816106084	0.855436876998012
ENSMUSG00000009555	107951	Cdk9	355.412620169623	0.641391474427075	0.121420279751735	5.28240814251551	1.27496766083419e-07	8.43160207986703e-07
ENSMUSG00000009563	30933	Tor2a	81.9161551653682	0.888175368908161	0.19040648969272	4.6646276098126	3.09176420743774e-06	1.62972518643626e-05
ENSMUSG00000009566	14287	Fpgs	115.920438016984	0.465953987292725	0.161721054606109	2.88122031127989	0.00396138639137887	0.0113319871127579
ENSMUSG00000009569	239719	Mrtfb	311.743721567474	-0.517873308630488	0.144546118244277	-3.58275486689516	0.000339989629748105	0.0012218168954952
ENSMUSG00000009575	12419	Cbx5	365.659539386069	0.27813389616765	0.134188969417044	2.0727031243771	0.0381999168331182	0.0814207173104751
ENSMUSG00000009580	69592	Odam	0	NA	NA	NA	NA	NA
ENSMUSG00000009585	80287	Apobec3	94.9524189804393	1.84745287618302	0.200736845160709	9.20335713507879	3.46937510849458e-20	1.39307159485907e-18
ENSMUSG00000009588	20445	St6galnac1	0	NA	NA	NA	NA	NA
ENSMUSG00000009596	74469	Taf7l	0.282138875025238	1.77056563478091	2.94326998934305	0.60156412466126	0.547464315271253	NA
ENSMUSG00000009614	192166	Sardh	39.8912123935889	1.46600344178585	0.228365625654067	6.41954513770205	1.36682125912144e-10	1.40709990398932e-09
ENSMUSG00000009621	22325	Vav2	94.9753480278024	0.711002246034442	0.226634314422284	3.13722239214687	0.00170556703987165	0.00530378198437099
ENSMUSG00000009628	104271	Tex15	0.302402315869403	-0.114346892700869	2.90283715113237	-0.0393914252669198	0.968578316250907	NA
ENSMUSG00000009630	19053	Ppp2cb	396.481716430868	-0.209451761973319	0.141969947084457	-1.47532464634024	0.140125283339469	0.238495764272032
ENSMUSG00000009633	14373	G0s2	330.496175800984	-0.32460936334436	0.215325251379434	-1.50753040465445	0.131674756474039	0.226619541175478
ENSMUSG00000009640	66233	Dmap1	203.481380607344	0.022978685078185	0.102212786650847	0.224812235642092	0.822125347047749	0.886417791946589
ENSMUSG00000009646	69836	Pla2g12b	0.407752434642252	0.635354783907493	2.20155765015245	0.288593298414646	0.772892624490801	NA
ENSMUSG00000009647	215999	Mcu	439.663407237041	0.321079779918985	0.114822058695284	2.79632488362773	0.00516874131742312	0.0143172074667168
ENSMUSG00000009654	18302	Oit3	4.19742541032292	1.96181055811898	0.847134197525371	2.3158202842593	0.0205680832330306	0.0477529202635565
ENSMUSG00000009670	83558	Tex11	0	NA	NA	NA	NA	NA
ENSMUSG00000009681	110279	Bcr	103.339968948855	-0.16163690071675	0.138514681240577	-1.16692973819876	0.243238745250532	0.368893490934841
ENSMUSG00000009687	18301	Fxyd5	290.016109590019	2.4274132507408	0.247943126481727	9.79020183049797	1.24048021711837e-22	7.22669356544941e-21
ENSMUSG00000009731	16506	Kcnd1	13.3172684946542	1.32224908141058	0.412795428816281	3.20315824524079	0.00135929267091868	0.0043216502157268
ENSMUSG00000009733	21422	Tfcp2	115.810643110223	-0.287507923816008	0.13169296712864	-2.18316839604021	0.0290234112235264	0.0641896971727695
ENSMUSG00000009734	218030	Pou6f2	0.0502714911065606	0.606966676079468	4.32794324778021	0.140243677268823	0.888467463415622	NA
ENSMUSG00000009739	19009	Pou6f1	177.018623519542	-0.469010682275906	0.1128419694478	-4.15634966822224	3.23372782087029e-05	0.000141700547141918
ENSMUSG00000009741	22221	Ubp1	256.778624864774	0.176839991620367	0.116402101934209	1.51921648047487	0.12870801431909	0.222263736020406
ENSMUSG00000009772	74137	Nuak2	27.3817550087884	1.10322272013909	0.282310305443054	3.90783722332668	9.31260105840172e-05	0.000373783551442062
ENSMUSG00000009828	56542	Cilk1	96.6676287510821	0.0367032293152162	0.147661172206201	0.248563849025675	0.803698175240115	0.873511491335867
ENSMUSG00000009863	67680	Sdhb	5667.75956074352	-0.527750069734263	0.111021013511622	-4.75360522338426	1.99821031876469e-06	1.09154269364065e-05
ENSMUSG00000009876	84682	Cox4i2	44.4159169627283	0.0199065690219014	0.232093222661619	0.0857697126767216	0.931649483512533	0.958565598446334
ENSMUSG00000009894	67826	Snap47	287.111396670817	-0.256029440632331	0.113452930552996	-2.25670187084974	0.0240267098769122	0.0545697341959347
ENSMUSG00000009900	22416	Wnt3a	0.0866850922941027	-0.114347064600714	4.32794324778021	-0.0264206478814995	0.978921825269675	NA
ENSMUSG00000009905	70750	Kdsr	71.415677908005	0.00631292906708825	0.173649570063141	0.0363544180661824	0.970999759246327	0.98196077398797
ENSMUSG00000009907	20479	Vps4b	287.159500477333	0.377828788329198	0.0972269090465308	3.88605162947613	0.000101887846216317	0.000406361954131836
ENSMUSG00000009927	75617	Rps25	2492.37918434926	0.448471140734882	0.108222293281044	4.14398112568399	3.41327849401834e-05	0.000148631355808874
ENSMUSG00000009941	83454	Nxf2	0.646693333055104	1.14940996474166	1.62054929439582	0.709271830678986	0.478155805660775	NA
ENSMUSG00000009995	66826	Tafazzin	481.269735576533	-0.139190845203614	0.0994205430216047	-1.40002097125307	0.161507038614585	0.267501838730828
ENSMUSG00000010021	286942	Kif19a	19.7604853719473	-0.253762763214213	0.372742924492114	-0.680798337245386	0.495999102325376	0.628756298696472
ENSMUSG00000010025	11671	Aldh3a2	198.807484449255	0.0336326073482851	0.0980254260714291	0.34310085348446	0.731522589069184	0.821351686067996
ENSMUSG00000010044	114602	Zmynd10	1.96812815387315	-1.72148494124613	1.10743922938491	-1.554473505695	0.120071511639853	0.2099662930619
ENSMUSG00000010045	56395	Tmem115	242.181701903885	0.118362983883892	0.103244211240928	1.14643700078916	0.251614380302579	0.378689693403949
ENSMUSG00000010047	15587	Hyal2	156.116690452858	-0.156546548005379	0.134472883652563	-1.16414955754089	0.244363408141034	0.370348362248031
ENSMUSG00000010048	15983	Ifrd2	603.265910520841	-0.559483042157836	0.0986269066271674	-5.67272219408454	1.40546048589554e-08	1.07026320416307e-07
ENSMUSG00000010051	15586	Hyal1	23.6532344857007	0.0914771567939762	0.294053580888094	0.311090096293672	0.755732129890473	0.839901446887703
ENSMUSG00000010054	80385	Tusc2	249.301082156745	-0.440196036760816	0.133136557102202	-3.30634985868607	0.000945199900358355	0.00310805781264655
ENSMUSG00000010057	56032	Nprl2	115.456258164615	-0.01780444374554	0.147135336103699	-0.12100725914672	0.903685285481651	0.942055456115724
ENSMUSG00000010064	76257	Slc38a3	750.879686913814	-1.56545786295377	0.151859531593051	-10.3085914103096	6.44388334987362e-25	5.05406057133862e-23
ENSMUSG00000010066	56808	Cacna2d2	7.4793923957119	-0.894954545583088	0.477952094725901	-1.87247750445854	0.0611405712658869	0.120737941766035
ENSMUSG00000010067	56289	Rassf1	76.4842514319459	-0.0532101185548995	0.176446013561852	-0.301566000164957	0.762982929892034	0.845190903578638
ENSMUSG00000010080	71889	Epn3	1.45476477160187	-0.356882931142243	1.09560449163025	-0.325740660857646	0.744620577692442	0.831402923865648
ENSMUSG00000010086	22671	Rnf112	3.93225276587632	0.371717323651642	0.694785111021612	0.535010491380663	0.59264260260038	0.712379804437704
ENSMUSG00000010095	17254	Slc3a2	470.544503903467	0.613343437610481	0.0900930683103037	6.80788710068091	9.90425375984729e-12	1.19831958605787e-10
ENSMUSG00000010097	53319	Nxf1	1094.79643584323	0.153799083964128	0.0865990096236908	1.7759912570877	0.0757343581954678	0.143599955369821
ENSMUSG00000010110	56389	Stx5a	279.187188495126	0.405416109237373	0.111969477107691	3.62077344388639	0.000293723635613995	0.00107063061900023
ENSMUSG00000010122	67473	Slc47a1	301.364352840004	-1.14661841819249	0.193951184387181	-5.91189180831978	3.38200664498553e-09	2.83337938250097e-08
ENSMUSG00000010136	100503311	Pifo	1.29953574760249	-0.1998783947837	1.27182778090411	-0.157158380863179	0.875120027893256	0.923404407802144
ENSMUSG00000010142	57916	Tnfrsf13b	25.6915983905903	2.59334459688703	0.398074012227991	6.5147297166481	7.28206604006032e-11	7.79939453610499e-10
ENSMUSG00000010154	234857	Spire2	3.22205456247383	-0.245488393373774	0.788408082743944	-0.311372243317681	0.755517652458489	0.83980199187194
ENSMUSG00000010175	19130	Prox1	33.5983947805913	0.413571596159553	0.253994168843792	1.62827201129134	0.103467221439214	0.186070840832515
ENSMUSG00000010205	71766	Raver1	0	NA	NA	NA	NA	NA
ENSMUSG00000010277	72503	Bltp2	3586.30164042203	-1.03048785922163	0.0979342671451022	-10.5222399601441	6.82318568334753e-26	6.25158880996528e-24
ENSMUSG00000010290	98404	AI597479	217.5541256196	-0.531109294525695	0.116370357496354	-4.56395688689309	5.01983917514917e-06	2.55002263743654e-05
ENSMUSG00000010307	67893	Tmem86a	157.587315776933	1.55762039295385	0.225343509484497	6.9122043786267	4.77179683788042e-12	6.03419754461454e-11
ENSMUSG00000010311	269120	Optc	1.26486983797702	0.168476608114281	1.1927895061972	0.141245883904035	0.887675699276872	0.931484151716586
ENSMUSG00000010342	83560	Tex14	1.01337413816458	-0.0483298810893127	1.17517991921389	-0.0411255164414669	0.967195832629198	0.979333048756056
ENSMUSG00000010358	70110	Ifi35	164.085842214907	0.628195121984539	0.164804810027205	3.8117523504371	0.000137985087287995	0.000536839491307493
ENSMUSG00000010362	66599	Rdm1	228.511506111774	-0.381990414097405	0.15830120669449	-2.4130606586886	0.015819186597026	0.0382004594085183
ENSMUSG00000010376	18002	Nedd8	872.70966680388	0.406183947508861	0.117890187214372	3.44544323074365	0.000570123707008771	0.00196242888698357
ENSMUSG00000010392	53334	Gosr1	225.019335503062	-0.397409227025482	0.104849668396075	-3.79027643200787	0.000150479722493194	0.000580631655110128
ENSMUSG00000010406	68836	Mrpl52	464.409355944011	0.313699595174305	0.105177766240404	2.98256567321732	0.00285843315346728	0.0084594680772926
ENSMUSG00000010435	78634	Spaca7	0	NA	NA	NA	NA	NA
ENSMUSG00000010453	226976	Kansl3	430.22267227547	-0.814656814767356	0.122950359376893	-6.62590023238649	3.45138229466187e-11	3.88873744625485e-10
ENSMUSG00000010461	14051	Eya4	391.334281189202	-0.790034917015166	0.157856126751062	-5.00477829575185	5.592636068784e-07	3.33128738884394e-06
ENSMUSG00000010476	13593	Ebf3	133.615660842341	-0.168185005494005	0.130703238066114	-1.28676999883455	0.198174466729447	0.314692535599916
ENSMUSG00000010492	100271841	Uckl1os	225.524434477507	-0.661988100663067	0.163262302100844	-4.05475172250217	5.01875796374806e-05	0.000211938515144305
ENSMUSG00000010505	17932	Myt1	0	NA	NA	NA	NA	NA
ENSMUSG00000010517	14084	Faf1	729.624787662234	-0.673710045168035	0.0939244675133316	-7.1728918247251	7.34298751582335e-13	1.03868490776457e-11
ENSMUSG00000010529	212539	Gm266	18.2699535707653	3.14361762035761	0.446037537402007	7.04787681922008	1.81668346413627e-12	2.44451859723597e-11
ENSMUSG00000010538	76927	Tsacc	10.8983948118643	-0.318717313280719	0.423528366983027	-0.752528846063082	0.451733089387075	0.587798326949537
ENSMUSG00000010554	67493	Mettl16	191.151530717392	-0.302733839245381	0.112609501141919	-2.68835077125377	0.00718059229278214	0.0191352721900594
ENSMUSG00000010592	13164	Dazl	4.69503261310815	-0.389071281476163	0.616626917487636	-0.630967073350256	0.528062053867931	0.657370727508392
ENSMUSG00000010601	75761	Apol7a	0.542444504367275	0.619032716855386	1.9853856120321	0.311794702804252	0.755196550062551	NA
ENSMUSG00000010607	66268	Pigyl	221.070278787953	-0.150108792331772	0.126896102552936	-1.18292673543029	0.236838184814409	0.361587902054563
ENSMUSG00000010608	67039	Rbm25	1390.58714038051	0.414759133241816	0.131650187708188	3.15046366786168	0.0016301153014854	0.00509508980183615
ENSMUSG00000010609	19165	Psen2	183.308298827706	0.843646726939888	0.129866220031043	6.49627537275069	8.23328954327222e-11	8.72088372694368e-10
ENSMUSG00000010651	235674	Acaa1b	5.61151354268997	-0.841018335417173	0.724494533030046	-1.16083461927558	0.245709161374352	0.37180088325372
ENSMUSG00000010660	18799	Plcd1	198.385950035966	0.56215908075474	0.113225846854285	4.96493597860392	6.87237366916229e-07	4.03396726992732e-06
ENSMUSG00000010663	76267	Fads1	227.454380170846	0.76096446917936	0.157777718930057	4.82301604015898	1.41403594619595e-06	7.90644176628895e-06
ENSMUSG00000010721	56873	Lmbr1	159.778157611201	-0.271674587042103	0.11797855080219	-2.30274558548874	0.0212931617309508	0.0492039735195202
ENSMUSG00000010751	79202	Tnfrsf22	52.3417237089265	0.865364099055576	0.211748543315043	4.08675349311884	4.37451478451956e-05	0.000186578701886502
ENSMUSG00000010755	27267	Cars	489.715477668128	-0.347487885412985	0.0873842494861852	-3.97655055065638	6.99221405384747e-05	0.000288107233612844
ENSMUSG00000010760	22113	Phlda2	0.0402476891642483	0.606966676079468	4.32794324778021	0.140243677268823	0.888467463415622	NA
ENSMUSG00000010796	74068	Asz1	0	NA	NA	NA	NA	NA
ENSMUSG00000010797	22413	Wnt2	4.26462602602179	0.440225218982349	0.712103484203121	0.618203995273218	0.536440876777744	0.664518114135263
ENSMUSG00000010803	14394	Gabra1	0.898904023690642	-2.79416297075325	1.7532940810172	-1.59366474854702	0.111011143777795	0.197236811382019
ENSMUSG00000010825	170935	Grid2ip	0.120955485487989	0	4.32794324778021	0	1	NA
ENSMUSG00000010830	105785	Kdelr3	143.152916409721	1.65006187166788	0.213951075224324	7.71233269072295	1.23538577358915e-14	2.21348187006547e-13
ENSMUSG00000010841	75437	Cfap97d1	0.399556842912052	-0.734452372407506	2.02315220385984	-0.363023785855702	0.716587116118055	NA
ENSMUSG00000010911	56369	Apip	242.094311073174	-0.276343390184839	0.133208797132591	-2.07451306620371	0.0380316865430283	0.0811136076233014
ENSMUSG00000010914	27402	Pdhx	891.262809439861	-0.740064366454482	0.0857333554056263	-8.63216379381221	6.02020905866228e-18	1.70674196899375e-16
ENSMUSG00000010936	234729	Vac14	344.263580257086	-0.0933799640596468	0.1059020766936	-0.881757629076691	0.377907889235198	0.516256816536801
ENSMUSG00000011008	68279	Mcoln2	8.51369495318248	3.95700799985809	0.735014627115114	5.38357721585637	7.30199017462878e-08	5.02342033959018e-07
ENSMUSG00000011034	20537	Slc5a1	0.0579491280617172	0.606966676079468	4.32794324778021	0.140243677268823	0.888467463415622	NA
ENSMUSG00000011096	67605	Akt1s1	1955.55778465257	-0.473907398232115	0.109113243086951	-4.34326196183597	1.40382571953226e-05	6.59909398988149e-05
ENSMUSG00000011114	21376	Tbrg1	263.328160451482	-0.0414329086099305	0.136010672393232	-0.304629834415789	0.760648094779151	0.843179918965208
ENSMUSG00000011118	208098	Panx3	0	NA	NA	NA	NA	NA
ENSMUSG00000011148	11565	Adssl1	12429.1324706352	-0.982324579547625	0.139531983693374	-7.04013913904006	1.92047960220021e-12	2.57045865481737e-11
ENSMUSG00000011154	75556	Cfap161	0.904752675088104	1.47673927372951	1.7695571136102	0.834524787231485	0.403985325462887	0.541683776049718
ENSMUSG00000011158	72308	Brf1	209.585643321241	0.0899961158872442	0.123854464261157	0.726627953413778	0.467453899394422	0.602999376045908
ENSMUSG00000011171	22355	Vipr2	18.9602917433529	0.528391440609046	0.359611198990438	1.46934089397782	0.141740350195935	0.240736454238242
ENSMUSG00000011179	18263	Odc1	1627.12158536386	-0.753168200712555	0.196497951467317	-3.83295701094282	0.000126612086016517	0.000495557246181541
ENSMUSG00000011254	66628	Thg1l	53.3722838026746	0.537672485614716	0.213259347511879	2.52121415491421	0.0116950651357608	0.0293424729825157
ENSMUSG00000011256	11492	Adam19	165.301391477993	0.946713189414485	0.169344366163319	5.59046167796015	2.2646666390734e-08	1.6727330686626e-07
ENSMUSG00000011257	230721	Pabpc4	5078.19230044177	-0.822505640405353	0.0739594975324841	-11.1210279659363	9.91232387768331e-29	1.33201808268308e-26
ENSMUSG00000011263	74463	Exoc3l2	41.7523685874824	-0.434078818490793	0.265433485126446	-1.63535816999128	0.101973985877141	0.18398582468005
ENSMUSG00000011267	63872	Zfp296	6.59087748709003	0.886145618406464	0.519026574810835	1.7073222478626	0.0877621731408127	0.162788453482963
ENSMUSG00000011305	66968	Plin5	241.131360467508	-1.91367852759183	0.224744567469203	-8.5149044942057	1.66727656573708e-17	4.41620154212383e-16
ENSMUSG00000011306	70616	Sugp1	268.611446116631	-0.0102868300965818	0.107756980788511	-0.0954632360827855	0.923946890215187	0.954147111330884
ENSMUSG00000011349	71241	Dmrtc2	0	NA	NA	NA	NA	NA
ENSMUSG00000011350	545936	Gm5893	0	NA	NA	NA	NA	NA
ENSMUSG00000011382	71755	Dhdh	289.506898287419	-1.08334750158093	0.128345587391537	-8.44086285784036	3.15003565829696e-17	7.97679255832811e-16
ENSMUSG00000011427	233056	Zfp790	73.0191482995551	-0.496148828568227	0.166049134219298	-2.98796395958906	0.00280842669903904	0.00832859452295572
ENSMUSG00000011463	76703	Cpb1	0.627086874555405	-0.703476569184525	1.74571802970777	-0.40297262055676	0.686968366389858	NA
ENSMUSG00000011486	103775	Slc25a41	0.516342027584113	-1.50341121387978	2.10764322488993	-0.713313902526506	0.475651536514385	NA
ENSMUSG00000011589	240121	Fsd1	1.35813090014304	1.26793171210212	1.17545796324565	1.07867040059955	0.280734685227064	0.411968719837325
ENSMUSG00000011632	641361	Pinlyp	0.0701865425158341	0	4.32794324778021	0	1	NA
ENSMUSG00000011658	70300	Fuz	121.793744926366	-0.0231325688642179	0.137632036181473	-0.16807546779092	0.86652390865055	0.917503935844363
ENSMUSG00000011751	80297	Sptbn4	0.742978633130498	-0.0084511984424712	1.70552328359271	-0.004955193824542	0.996046343531263	0.997431871755163
ENSMUSG00000011752	18648	Pgam1	184.153864209811	0.583207746973224	0.17613652804095	3.31111185998644	0.000929260542352637	0.00306564725895288
ENSMUSG00000011831	14020	Evi5	164.531787934742	-0.164831345959678	0.123089114609584	-1.33912203757817	0.180530947320489	0.292356576294617
ENSMUSG00000011832	213027	Evi5l	162.013830810039	-0.863053069995008	0.130654386643978	-6.60561877915936	3.95860363175655e-11	4.40361884135302e-10
ENSMUSG00000011837	102209	Snapc2	163.434148878008	-0.130509289003199	0.124061363339527	-1.05197368052473	0.292811625143333	0.425660170778462
ENSMUSG00000011877	216963	Git1	614.275892958568	-0.776593838493686	0.114892006582405	-6.75933741253517	1.38624222751241e-11	1.64658129522496e-10
ENSMUSG00000011884	56356	Gltp	228.219040369439	1.21398313874425	0.151173960643308	8.03037198720104	9.71775653916123e-16	1.99268381037511e-14
ENSMUSG00000011958	12175	Bnip2	871.676689519871	0.011247045058673	0.068706940898526	0.163695907743642	0.869970539239627	0.919703999551747
ENSMUSG00000011960	12455	Ccnt1	241.453988095533	0.260281238967123	0.103593275090463	2.51253026550065	0.0119868822673114	0.0299701793428673
ENSMUSG00000012017	224024	Scarf2	273.777044236959	1.07212949208438	0.115639099380016	9.27134073018949	1.8382054826804e-20	7.78418233495563e-19
ENSMUSG00000012042	67741	4930579F01Rik	0.471043164546763	1.78625659962653	2.37213477410189	0.75301648925189	0.451440005384417	NA
ENSMUSG00000012076	52592	Brms1l	197.850015068471	-0.104052798599168	0.11061541621213	-0.940671763143968	0.346873093546597	0.483267967004338
ENSMUSG00000012114	94112	Med15	220.389299593653	0.109094193483877	0.123373994541745	0.884255988379813	0.376558040800426	0.514874537268633
ENSMUSG00000012117	67422	Dhdds	205.242928456213	0.422935817300489	0.113892757100291	3.71345665930331	0.000204447491081003	0.000770865708514736
ENSMUSG00000012123	230806	Crybg2	0.344020411477232	0.671210464774681	2.31114351479355	0.290423532973304	0.771492242442731	NA
ENSMUSG00000012126	67586	Ubxn11	15.3408152796436	0.966672147969939	0.365552883698834	2.64441122222509	0.0081833170263418	0.0214361431189047
ENSMUSG00000012187	68393	Mogat1	1.96754814205897	-0.0623304655443421	1.04050549054258	-0.0599040236797207	0.952232075219455	0.970659207050591
ENSMUSG00000012211	75671	Tex22	0.168949885904231	1.39769099268607	3.99207642775478	0.350116291103212	0.726251425197222	NA
ENSMUSG00000012282	20890	Wnt8a	0	NA	NA	NA	NA	NA
ENSMUSG00000012296	74094	Tjap1	325.896623039351	-0.462622398093542	0.144665011948303	-3.19788725596526	0.00138438393526235	0.00439518459333487
ENSMUSG00000012350	13661	Ehf	1.02550027116764	0.192749378005931	1.1497230038375	0.167648535658223	0.866859785601319	0.917714952645262
ENSMUSG00000012396	71950	Nanog	0	NA	NA	NA	NA	NA
ENSMUSG00000012405	66480	Rpl15	1953.67065076117	0.299037154635395	0.1090458340402	2.74230700574177	0.00610092899422199	0.0165915307253822
ENSMUSG00000012422	66074	Tmem167	289.273343837388	0.171856872554829	0.101958489698288	1.6855572602476	0.0918811071684396	0.168736103971778
ENSMUSG00000012428	117167	Steap4	489.436678179494	-0.51817075096585	0.121405677860189	-4.26809322346995	1.97150940056546e-05	9.01536183920098e-05
ENSMUSG00000012429	66308	Mplkip	54.3589441611233	0.59479474391337	0.21893641458789	2.71674652676197	0.00659270763205067	0.0177469561617582
ENSMUSG00000012443	16551	Kif11	42.4563271116472	2.55461447129761	0.327318422802732	7.80467671029084	5.9654266030432e-15	1.10519397093329e-13
ENSMUSG00000012483	68240	Rpa3	61.1426278762419	0.541270309848636	0.200955751395067	2.69348006260607	0.00707103743708362	0.0188782651151384
ENSMUSG00000012519	74568	Mlkl	34.7861276265022	1.84815694966882	0.268256329748698	6.8895185116421	5.59815399289729e-12	6.98712012599571e-11
ENSMUSG00000012520	18935	Phox2b	0	NA	NA	NA	NA	NA
ENSMUSG00000012535	320938	Tnpo3	303.364679137793	-0.671328817566769	0.148864902771643	-4.50965140249733	6.49342385021867e-06	3.23339783964569e-05
ENSMUSG00000012609	320244	Ttll5	65.5690966232404	0.110822706467902	0.189972318406659	0.583362394044551	0.559649367947574	0.684602973169695
ENSMUSG00000012640	69930	Zfp715	125.647975532502	-0.179320891132525	0.153519480781791	-1.16806603448202	0.242780129649994	0.368419714925464
ENSMUSG00000012705	57264	Retn	115.615524261406	-0.584353577535388	0.701567351342329	-0.832925842996154	0.404886553664847	0.542495231469179
ENSMUSG00000012777	100503991	Acp4	0.224399018014182	0	3.64847717257203	0	1	NA
ENSMUSG00000012819	22295	Cdh23	54.785059781519	-1.16682289769474	0.221905050711431	-5.25820793151795	1.45465988775375e-07	9.51999329787414e-07
ENSMUSG00000012848	20103	Rps5	3470.95423682475	0.507202638901987	0.113975893742151	4.4500869635595	8.58355249705718e-06	4.19134369387552e-05
ENSMUSG00000012889	244550	Podnl1	7.24301487320435	3.91116485495887	0.806031500703572	4.85237221069509	1.21993390056173e-06	6.88222995623365e-06
ENSMUSG00000013033	330814	Adgrl1	310.533585567157	-1.28758258281401	0.0871841938024731	-14.7685323067986	2.33747849645059e-49	4.28332309572315e-46
ENSMUSG00000013076	75723	Amotl1	4631.52016757423	-0.733577547723479	0.0929929463028886	-7.88852893566931	3.05769336654988e-15	5.84762098572541e-14
ENSMUSG00000013083	69147	2200002J24Rik	0.0701865425158341	0	4.32794324778021	0	1	NA
ENSMUSG00000013089	104156	Etv5	189.591775313107	-0.0321865613627833	0.135182158532009	-0.238097702480183	0.811805316660801	0.878910719085388
ENSMUSG00000013091	78052	Tmem190	1.00612810420089	0.382618634848417	1.34326775703687	0.284841672737267	0.775765443873454	0.85453325603351
ENSMUSG00000013150	70575	Gfod2	116.284885441027	-0.464505025093054	0.131138332902844	-3.54209951286471	0.000396955690447949	0.00140696955378219
ENSMUSG00000013155	102124	Enkd1	19.9617266047637	0.734639739074925	0.371167802972634	1.97926580158972	0.047786087816641	0.0981279718948689
ENSMUSG00000013158	71046	4933405L10Rik	0.948538841254259	0.282013045691519	1.35308974922433	0.208421537339401	0.834899841194702	0.894844820885694
ENSMUSG00000013160	11972	Atp6v0d1	536.494246465089	0.535286495680606	0.112645960396124	4.75193689856475	2.01477255785984e-06	1.09910068873561e-05
ENSMUSG00000013236	19280	Ptprs	588.132914834531	0.0688400201783267	0.106953314570694	0.643645505093952	0.519805334986676	0.650264763689346
ENSMUSG00000013275	98396	Slc41a1	823.924502524721	-1.05784076527938	0.160943116506237	-6.57276178219396	4.93904449087004e-11	5.42837076349331e-10
ENSMUSG00000013338	74562	Fer1l4	0.247224637125279	1.9308878385905	4.22816783201875	0.456672467911141	0.647906482889471	NA
ENSMUSG00000013353	74054	4931406B18Rik	0	NA	NA	NA	NA	NA
ENSMUSG00000013367	210094	Iglon5	12.7987003432104	1.1934514420943	0.405731794357271	2.94147872730771	0.00326649277674028	0.00953520122947898
ENSMUSG00000013415	140486	Igf2bp1	0.0665016834959699	0	4.32794324778021	0	1	NA
ENSMUSG00000013418	14422	B4galnt2	1.48667020512239	0.418903404037108	1.06784754487696	0.392287650092761	0.694845687652027	0.793586295314291
ENSMUSG00000013419	270210	Zfp651	1692.4028031218	-1.51461354623849	0.126215940113238	-12.0001764030724	3.54539965978172e-33	9.28111960288572e-31
ENSMUSG00000013465	58202	Nelfb	323.844606050266	0.0857970951556545	0.0873770177570303	0.981918327702954	0.326140085800807	0.461819860167676
ENSMUSG00000013483	170720	Card14	15.7752727974395	1.23500010512566	0.373493132126037	3.30662065483149	0.000944286743303	0.00310657546674695
ENSMUSG00000013495	72392	Tmem175	59.8839419263424	-0.0980300638960127	0.172835652485123	-0.567186587295413	0.57058741972547	0.693436067732201
ENSMUSG00000013523	76960	Bcas1	13.9487830027	-0.144830136214971	0.39405216436854	-0.367540516994896	0.713215875142508	0.80770225266855
ENSMUSG00000013539	27883	Tango2	388.421642879166	-0.775479464457432	0.11543779922529	-6.71772564672683	1.84582801489704e-11	2.15439231593976e-10
ENSMUSG00000013562	NA	4833413E03Rik	0.0464374031298544	-0.835681072974956	4.32794324778021	-0.193089656016995	0.846888753521154	NA
ENSMUSG00000013584	19378	Aldh1a2	56.7893608686076	0.244270464857297	0.309141263698138	0.79015807186392	0.429435458928025	0.566347366656093
ENSMUSG00000013593	226646	Ndufs2	8666.46590061517	-0.518258060066318	0.112010653322556	-4.62686400528257	3.71244107603783e-06	1.93463481824443e-05
ENSMUSG00000013611	66696	Snx31	0.0920311874483592	1.27980322155059	4.32302130575704	0.296043699772252	0.767196708733927	NA
ENSMUSG00000013622	381629	Atraid	399.992004382374	0.493199087490248	0.130763427168779	3.77168982313124	0.000162145738054415	0.000622030028303954
ENSMUSG00000013629	69719	Cad	167.408574697889	0.255821100084425	0.186018987489198	1.37524186932412	0.169056471747231	0.277511659959919
ENSMUSG00000013643	70163	Lypd8	0	NA	NA	NA	NA	NA
ENSMUSG00000013646	79566	Sh3bp5l	246.620587557939	-0.141819707419858	0.122912309715133	-1.15382834923975	0.248570549102785	0.375116909355757
ENSMUSG00000013653	69864	1810065E05Rik	0.0594683147753748	0	4.32794324778021	0	1	NA
ENSMUSG00000013662	67979	Atad1	685.156456820735	-0.616956224561526	0.119664253582583	-5.15572701195811	2.52648747572413e-07	1.59643912376713e-06
ENSMUSG00000013663	19211	Pten	441.443519848938	-0.561251388261865	0.0995285669768055	-5.63909845494571	1.70942781325491e-08	1.28570658327535e-07
ENSMUSG00000013668	233918	4933402N03Rik	0	NA	NA	NA	NA	NA
ENSMUSG00000013698	18611	Pea15a	747.028271518893	0.559074653198799	0.0919983607030847	6.07700668714256	1.22446658468162e-09	1.09647147700699e-08
ENSMUSG00000013701	53600	Timm23	1281.54103968046	-0.799410534920224	0.0998796618014165	-8.00373690200948	1.20699135114556e-15	2.43780808266944e-14
ENSMUSG00000013707	69769	Tnfaip8l2	58.5623772934717	2.92619373094806	0.33635037736831	8.69983781152063	3.32358844046489e-18	9.78008353203662e-17
ENSMUSG00000013736	70047	Trnt1	207.247745146075	-0.326411283003751	0.133713071899337	-2.44113218227072	0.0146412946347064	0.0357207184642673
ENSMUSG00000013766	70274	Ly6g6e	0.816972217487551	-3.12079615325794	1.52626454089808	-2.04472820381558	0.0408816614455284	0.0861167990132215
ENSMUSG00000013787	110147	Ehmt2	609.438390269315	0.229407567844366	0.0901772710680668	2.54396218833464	0.0109602948391563	0.027747634146304
ENSMUSG00000013822	66126	Elof1	276.444370215037	0.0179596899060938	0.0957814463702653	0.187506981640959	0.851263150212367	0.907206900646647
ENSMUSG00000013833	216154	Med16	356.304659300439	-0.190915206843605	0.100928482645224	-1.89158899291785	0.0585457635846982	0.116438772232537
ENSMUSG00000013846	20442	St3gal1	306.867248586196	0.239365568965071	0.147532947201522	1.62245500754561	0.104705959293884	0.187958966609396
ENSMUSG00000013858	216157	Tmem259	1221.85926315523	-0.046338184867294	0.0874695247136625	-0.529763766511654	0.596275730092375	0.71521384496978
ENSMUSG00000013878	77733	Rnf170	234.533629264748	-0.680649669401439	0.0996924350809149	-6.82749567556448	8.64097310472476e-12	1.05433471472117e-10
ENSMUSG00000013921	76686	Clip3	72.0974607952266	0.513451668007209	0.248531037459	2.0659458603512	0.0388335919071171	0.082500918220042
ENSMUSG00000013928	NA	1700020L13Rik	0.993489458597863	1.30540475940115	1.38158256838309	0.944861920868695	0.344729374306519	0.481169654597098
ENSMUSG00000013936	17906	Myl2	807.292431753426	-1.96736464667114	0.563003156433124	-3.4944113975049	0.000475108281110213	0.00166176602851615
ENSMUSG00000013973	21945	Dedd	21.3984136239024	-0.882604170842459	0.425077999261266	-2.07633463123549	0.0378630124605646	0.0807973201109932
ENSMUSG00000013974	69189	Mcemp1	2.57598686129985	2.70182343690891	1.09419513555192	2.46923363952454	0.0135402780243848	0.0333616164451198
ENSMUSG00000013997	27045	Nit1	244.284070434234	-0.243868372815533	0.103019185096338	-2.36721318060786	0.0179226059177046	0.0424718983638811
ENSMUSG00000014030	18507	Pax5	1.5905175842675	0.878082574917776	1.15896171981205	0.75764588243706	0.448663004680842	0.584860647051137
ENSMUSG00000014039	114604	Prdm15	61.4942108230108	-0.615199713962614	0.212007442934697	-2.90178356687274	0.00371044795159053	0.0106936659079511
ENSMUSG00000014074	70238	Rnf168	193.528844970436	0.0197570088131077	0.126922885613495	0.155661516184494	0.876299832959384	0.924213883055792
ENSMUSG00000014075	66061	Dynlt2b	61.6020399057237	0.671999191888351	0.218318221400649	3.078071942768	0.00208344610455166	0.00634956503317929
ENSMUSG00000014077	56398	Chp1	838.53909206692	-0.476894711505018	0.0897586944361323	-5.31307540178575	1.07790409960066e-07	7.22317584296894e-07
ENSMUSG00000014104	84543	Sval2	0	NA	NA	NA	NA	NA
ENSMUSG00000014158	63873	Trpv4	37.2793922102055	-0.106813769822044	0.228391840441236	-0.467677696434724	0.640015093173194	0.750925978891839
ENSMUSG00000014164	100503085	Klhl3	26.9030426199287	0.59386808307064	0.285914640806558	2.07708175207591	0.0377940144820386	0.080717731501849
ENSMUSG00000014177	67510	Tvp23b	80.8792150452064	0.63053964237852	0.193458594345718	3.25930023688543	0.00111687403718024	0.00361187710050411
ENSMUSG00000014195	56354	Dnajc7	804.131046384576	0.22260896299742	0.0859172573361708	2.59096914751843	0.00957060713130765	0.0245876533196238
ENSMUSG00000014198	278304	Zfp385c	7.73508134121164	1.05134340003695	0.522159921356754	2.01345096978181	0.0440672080975269	0.091686902727276
ENSMUSG00000014226	12301	Cacybp	693.53101765564	-0.11827411427383	0.121945809755737	-0.969890761402453	0.332100945570337	0.468090256615711
ENSMUSG00000014232	76779	Cluap1	48.3092675869338	0.438712424551098	0.215454299869383	2.03622032522472	0.0417282361787632	0.087716764694476
ENSMUSG00000014243	69747	Zswim7	279.932480931665	-0.329944148117165	0.143587140690673	-2.2978669714439	0.0215693616276806	0.0497395746858665
ENSMUSG00000014245	327942	Pigl	25.3070867416698	-0.16800116954829	0.266192342244807	-0.631126981834008	0.527957500237853	0.657290627375467
ENSMUSG00000014294	17991	Ndufa2	2094.28093969934	0.0916327974115796	0.137822911866579	0.664858956835026	0.506140709275755	0.637849509304515
ENSMUSG00000014301	66449	Pam16	223.175474049043	-0.0842654271252732	0.152452370318229	-0.552732810578004	0.580446382667771	0.701778894879694
ENSMUSG00000014303	83396	Glis2	110.240118423799	0.344569112111888	0.129589217499177	2.65893350358471	0.00783884327972177	0.0206545835280198
ENSMUSG00000014313	12864	Cox6c	4747.57533522124	-0.251123581078422	0.123558539388659	-2.0324259441794	0.0421105538262559	0.0883729758954546
ENSMUSG00000014329	83675	Bicc1	258.338109821574	0.80603950572244	0.142820374076907	5.64372913131006	1.66405808607304e-08	1.25439113092649e-07
ENSMUSG00000014349	268470	Ube2z	457.035010252991	0.210877767871867	0.101483715937345	2.07794685013367	0.0377142547491113	0.0805815383694973
ENSMUSG00000014351	14607	Gip	0	NA	NA	NA	NA	NA
ENSMUSG00000014353	72477	Tmem87b	193.888666719411	0.00270177936700741	0.117470687306744	0.0229996046584151	0.981650588303591	0.98849710273676
ENSMUSG00000014355	17222	Anapc1	363.211188939457	-0.285681078038463	0.09265975753124	-3.08311920568265	0.00204843082617104	0.00625609396411057
ENSMUSG00000014361	17289	Mertk	85.1452088967459	0.957057206368881	0.263407922461574	3.6333653043731	0.000279748514020945	0.00102432167068487
ENSMUSG00000014402	22088	Tsg101	520.161045302178	-0.0250451774383406	0.0872032705182168	-0.28720456571762	0.773955690589412	0.852959259442908
ENSMUSG00000014418	246694	Hps5	200.42671893152	0.0308786030349051	0.113966958761848	0.270943467917142	0.786434512392133	0.861764635296995
ENSMUSG00000014426	26407	Map3k4	424.327321623916	-1.13377778731832	0.127794865978025	-8.87185708628764	7.19360622983825e-19	2.32727824284847e-17
ENSMUSG00000014444	234839	Piezo1	190.370106599076	-0.706826112995375	0.278007861595735	-2.54246807604026	0.0110072655896522	0.0278420695809537
ENSMUSG00000014453	12143	Blk	1.21855028262057	1.65132768367968	1.78907183054388	0.92300803997214	0.356003015374832	0.492799573827757
ENSMUSG00000014470	68718	Rnf166	448.900218775527	-0.283088074690078	0.10639230223156	-2.66079470743988	0.0077956471982015	0.0205515119767392
ENSMUSG00000014496	105522	Ankrd28	608.013582033378	-0.670522984515569	0.102898036603998	-6.51638268955578	7.20230872195434e-11	7.71807213760944e-10
ENSMUSG00000014498	237615	Ankrd52	520.388525831044	-1.10195423903811	0.195932041410624	-5.62416555814214	1.86406812437251e-08	1.3931783901734e-07
ENSMUSG00000014503	53871	Pkd2l2	40.2808326908824	-0.0199453042837097	0.209234459224189	-0.0953251407902121	0.92405657411531	0.954211494080036
ENSMUSG00000014504	66384	Srp19	411.044674150801	0.099096510338798	0.111231684142083	0.89090182444973	0.372981841448533	0.511094152146708
ENSMUSG00000014529	75010	Tmbim7	0	NA	NA	NA	NA	NA
ENSMUSG00000014542	51811	Clec4f	0	NA	NA	NA	NA	NA
ENSMUSG00000014543	170733	Klra17	1.34827899654522	4.48209739521943	1.46660171946783	3.05611082799344	0.00224228357099362	0.0067823694388533
ENSMUSG00000014547	268752	Wdfy2	156.437294283305	-0.0790200468247019	0.122991326786941	-0.642484709198956	0.52055851436196	0.650924191935113
ENSMUSG00000014550	78287	Rbsn	210.116607796602	-0.540611214833087	0.10906997369572	-4.95655400395774	7.17544297164347e-07	4.19476229638681e-06
ENSMUSG00000014551	64658	Mrps25	259.398800330714	-0.022552011384644	0.128506613682181	-0.175493001787588	0.860692269216645	0.913969764545354
ENSMUSG00000014554	27369	Dguok	207.490656146577	0.173696493274627	0.130512482968263	1.33088030603835	0.183228398331383	0.295821772139823
ENSMUSG00000014592	100072	Camta1	402.036060710732	-0.6480892656292	0.151510188957091	-4.27752925456879	1.88979129002158e-05	8.67908932170542e-05
ENSMUSG00000014599	12977	Csf1	282.838889807006	0.813976668339834	0.172073863467727	4.73039107704174	2.24087734119754e-06	1.21000172961476e-05
ENSMUSG00000014601	229707	Strip1	325.886294114902	-0.276169708544237	0.105574243107925	-2.61588149168087	0.00889974405266957	0.0230521897802185
ENSMUSG00000014602	16560	Kif1a	18.6316231340129	-1.88271375123006	0.455326222233828	-4.13486783606152	3.55158968809279e-05	0.000154254241204237
ENSMUSG00000014603	11694	Alx3	0	NA	NA	NA	NA	NA
ENSMUSG00000014606	67863	Slc25a11	3029.83627902971	-0.531148898171753	0.103740726483665	-5.11996509158231	3.05592218543034e-07	1.90470697253307e-06
ENSMUSG00000014609	11448	Chrne	180.347751431208	0.094132151646226	0.151936283354987	0.61955017963875	0.535553975524175	0.663868242090942
ENSMUSG00000014633	66531	Cmc2	268.725760961959	-0.293367747193908	0.117409743808737	-2.49866610450841	0.0124661705356617	0.0310146382976219
ENSMUSG00000014668	231600	Chfr	178.105362581605	0.0396109496707351	0.140951932871794	0.281024522783693	0.778691590984873	0.856259145681201
ENSMUSG00000014686	330483	Ceacam16	0.568192641718316	3.00227919299267	2.02304623273064	1.48403884420392	0.137798615781834	NA
ENSMUSG00000014704	15399	Hoxa2	6.5241509646266	1.09528599431164	0.585703205323457	1.87003585494596	0.0614788389705823	0.121195986027387
ENSMUSG00000014725	13522	Adam28	0	NA	NA	NA	NA	NA
ENSMUSG00000014747	75305	Ankrd53	0.402201995380237	0.972050529914265	2.12419941552567	0.457607945284984	0.647234134264254	NA
ENSMUSG00000014748	21766	Tex261	799.970970481826	-0.130041316808677	0.0826700625823934	-1.57301582636485	0.115715153650469	0.203940749508832
ENSMUSG00000014763	67544	Fam120b	175.566317983355	-0.810310181470632	0.140263807127699	-5.7770439720983	7.60244227220139e-09	6.03217046257642e-08
ENSMUSG00000014767	21374	Tbp	80.9704059928057	0.110000090383825	0.146407195255804	0.751329811295347	0.452454192337548	0.588584650206386
ENSMUSG00000014769	19170	Psmb1	1238.26179384417	0.375347349642955	0.0949329066554422	3.95381709953614	7.69142130310023e-05	0.000314410827837338
ENSMUSG00000014771	18567	Pdcd2	0	NA	NA	NA	NA	NA
ENSMUSG00000014773	13388	Dll1	92.7927559153533	-0.0203503845049748	0.234343817909188	-0.0868398607078291	0.930798803021732	0.958146175300578
ENSMUSG00000014776	78688	Nol3	916.439231457108	0.52019974820625	0.11401773618673	4.5624458580225	5.05611343876038e-06	2.56586300566699e-05
ENSMUSG00000014778	234686	Fhod1	657.900642310117	-0.399601721695281	0.117668003379497	-3.39601004706866	0.000683758496991485	0.00231289142873928
ENSMUSG00000014782	102075	Plekhg4	9.7831838066738	0.873570653586793	0.491880595979039	1.77598112372788	0.0757360284534688	0.143599955369821
ENSMUSG00000014786	277973	Slc9a5	36.8284241785991	-0.158065938638262	0.249643413117583	-0.633166870554732	0.526624677659519	0.656229823663633
ENSMUSG00000014791	234683	Elmo3	32.7779163897489	0.362164271071878	0.230685147470092	1.56995053666744	0.116426619123694	0.204872227121458
ENSMUSG00000014813	20855	Stc1	14.417067885372	0.260136790797541	0.430974093987976	0.603601920455105	0.546108335707931	0.672731511511628
ENSMUSG00000014837	74356	4931428F04Rik	14.2692655076315	0.951702161025505	0.360575322488419	2.63939904277857	0.00830531563749992	0.0217133913495572
ENSMUSG00000014846	67971	Tppp3	1311.97093046131	0.938172013151266	0.13109717509504	7.15630990882242	8.28776678339908e-13	1.16822737799283e-11
ENSMUSG00000014850	17686	Msh3	121.727893586949	-0.57657651239277	0.138242922153343	-4.17074887749561	3.03600280696973e-05	0.000133821798775615
ENSMUSG00000014852	279028	Adamts13	0.148468308332526	1.90774839290068	4.11537585380293	0.463566016974554	0.642958706389081	NA
ENSMUSG00000014856	66320	Tmem208	201.252236999422	0.520169276266419	0.128782157391798	4.03914087790819	5.36473379254031e-05	0.000225661392020524
ENSMUSG00000014859	104394	E2f4	339.536560535088	-0.188791927239282	0.0990958171810674	-1.90514526858709	0.0567611903679185	0.113426718969578
ENSMUSG00000014867	20932	Surf4	1441.01863781908	0.223962030152093	0.0946068996875069	2.36729066158869	0.0179188538753593	0.0424679997137704
ENSMUSG00000014873	20931	Surf2	92.1156756125819	0.049257191525045	0.137926765226757	0.357125692348866	0.720997711295371	0.813999712477921
ENSMUSG00000014905	27362	Dnajb9	343.362634172329	-0.255673933689226	0.132060355616213	-1.93603850675863	0.0528629849859078	0.106822976276786
ENSMUSG00000014907	234344	Naf1	60.568058267641	-0.0602408948306832	0.167798777013079	-0.359006757397211	0.719590034138237	0.812820191545219
ENSMUSG00000014932	22612	Yes1	116.006649212161	0.0586007001324639	0.175146524057851	0.334581005519174	0.737941175289819	0.826371126128716
ENSMUSG00000014956	19046	Ppp1cb	3649.38083133475	-0.601054257139061	0.155727882159243	-3.85964445676105	0.000113552116104103	0.000448358472930541
ENSMUSG00000014959	70231	Gorasp2	870.135853042853	-0.0640475066389116	0.0907595892367795	-0.705683081837451	0.480385244324346	0.615317112038056
ENSMUSG00000014980	66637	Tsen15	184.86209903728	0.195894096538672	0.137319329000153	1.42655879521851	0.153707108291128	0.257032867249399
ENSMUSG00000015001	18256	Oc90	0.042418234944148	-0.835681072974956	4.32794324778021	-0.193089656016995	0.846888753521154	NA
ENSMUSG00000015002	76740	Efr3a	503.527462986284	-0.228873994884872	0.084403849659893	-2.71165350641143	0.00669485340976259	0.017976310134619
ENSMUSG00000015013	59005	Trappc2l	308.274254641368	0.517314267468044	0.121231048222463	4.26717639625417	1.97962627397685e-05	9.04837342506834e-05
ENSMUSG00000015016	257633	Acsf3	176.492708965199	0.0102106412768598	0.125763536825938	0.0811892026461673	0.935291486208759	0.960706205757009
ENSMUSG00000015023	13680	Ddx19a	251.077244541035	-0.299423589493627	0.102420243270676	-2.923480553569	0.00346141845855861	0.0100463372021837
ENSMUSG00000015027	50917	Galns	65.8233670496746	2.42857660002285	0.270409205121081	8.98111659673498	2.68032622610017e-19	9.45830679906877e-18
ENSMUSG00000015053	14461	Gata2	99.0810329861067	-0.713362056613801	0.158702697158433	-4.49495862002681	6.95834773970349e-06	3.44533076367485e-05
ENSMUSG00000015083	69379	C8g	23.0745002760804	-0.561047018010862	0.280985303282694	-1.99671303607792	0.0458563651839106	0.0948805946429979
ENSMUSG00000015085	12496	Entpd2	122.157805471512	0.519396208652805	0.206578284526182	2.51428270809838	0.0119274778191955	0.0298475692615175
ENSMUSG00000015087	227624	Rabl6	1467.74338035667	-0.77085097247534	0.091102413925244	-8.4613671500283	2.64260992806838e-17	6.81164812277165e-16
ENSMUSG00000015090	19215	Ptgds	12.9167282428765	7.20382732305562	1.09825879712744	6.55931674929232	5.40548746003547e-11	5.90880752342381e-10
ENSMUSG00000015092	59022	Edf1	1546.35818193153	0.1349845681255	0.108512921028381	1.24394926287346	0.213518236890598	0.333291954519292
ENSMUSG00000015093	69454	Clic3	5.81819043734369	-0.172997455242713	0.562499154483013	-0.307551493835957	0.758423634473105	0.84190318617008
ENSMUSG00000015094	18146	Npdc1	350.160844261562	1.21289954571094	0.104263593060107	11.6330111989496	2.80041375032438e-31	5.53411176130279e-29
ENSMUSG00000015095	30839	Fbxw5	839.152386343078	-0.693671069258311	0.0910677742485726	-7.61708601074308	2.59466452331407e-14	4.45111938693122e-13
ENSMUSG00000015112	50799	Slc25a13	18.707562563199	0.292794654344968	0.315304484162722	0.928609230288848	0.353091636590999	0.49003498476761
ENSMUSG00000015120	22196	Ube2i	391.478495260758	0.401705587300989	0.105595929655236	3.80417681450918	0.000142276530873229	0.000551513083233016
ENSMUSG00000015126	68327	Tsr3	143.552675008345	-0.0319656786333876	0.145076455369491	-0.220336777266685	0.825608879757681	0.88879503253982
ENSMUSG00000015127	74154	Unkl	22.5901086434137	-0.805507502175175	0.352714813813617	-2.28373595502236	0.0223870536164642	0.0513257324553082
ENSMUSG00000015133	233328	Lrrk1	143.533229942755	0.675671645740281	0.132448987376426	5.10137268033612	3.37198827275407e-07	2.08750514784717e-06
ENSMUSG00000015134	56847	Aldh1a3	40.5887920854908	0.858734423744255	0.308744876504729	2.78137222377875	0.00541296343707611	0.0149217439734919
ENSMUSG00000015143	109711	Actn1	296.792838917456	0.976771287965684	0.140988571608516	6.92801747561419	4.26779035590547e-12	5.42749843558275e-11
ENSMUSG00000015149	64383	Sirt2	951.513292991235	-0.578855628474352	0.0796612946219638	-7.2664602203785	3.69029821057652e-13	5.45347075004332e-12
ENSMUSG00000015165	15388	Hnrnpl	1117.45303972421	0.495512505042022	0.102949747058528	4.81314931993292	1.48570194751915e-06	8.28188444583613e-06
ENSMUSG00000015176	70769	Nolc1	335.884328790961	-0.252352229556157	0.102430295991821	-2.46364834849552	0.0137530969065334	0.0338322155656571
ENSMUSG00000015189	213819	Casd1	294.30689075971	-0.0699453595000957	0.107296565849199	-0.651888147085723	0.514473331818884	0.645477340313285
ENSMUSG00000015202	215748	Cnksr3	57.5204754130425	0.191762572770723	0.189577212252481	1.01152754855015	0.311764002731852	0.446418058042619
ENSMUSG00000015214	53332	Mtmr1	292.36537189748	-0.740765657357225	0.128896758907345	-5.74696884263558	9.08574635076067e-09	7.12058278352577e-08
ENSMUSG00000015217	15354	Hmgb3	116.528903076822	0.11388951167076	0.131613623132528	0.865332242666696	0.386856458817757	0.525108797332628
ENSMUSG00000015222	17756	Map2	20.3250200494894	0.376650056831431	0.303152674332174	1.24244345744654	0.214072990076839	0.334009541061912
ENSMUSG00000015224	74519	Cyp2j9	19.4333177744799	0.105947034178842	0.312969636655374	0.338521766236083	0.734970027213087	0.824005274961577
ENSMUSG00000015242	73398	Nipsnap3a	0	NA	NA	NA	NA	NA
ENSMUSG00000015243	11303	Abca1	282.270819213966	1.32139273856429	0.261217571885582	5.05859054207534	4.22366693801021e-07	2.57209832234054e-06
ENSMUSG00000015247	66536	Nipsnap3b	46.232015946384	1.32407674394048	0.249592048278109	5.3049636519875	1.12695449593195e-07	7.53433558026542e-07
ENSMUSG00000015289	66192	Lage3	283.893129034046	0.201446849246798	0.161051629983059	1.25082154876661	0.210999591150069	0.330287573183775
ENSMUSG00000015290	27643	Ubl4a	677.772036013225	-0.568721585728079	0.0851921019979877	-6.67575482221946	2.45962877653984e-11	2.82660987734969e-10
ENSMUSG00000015290	100169864	Ubl4a	677.772036013225	-0.568721585728079	0.0851921019979877	-6.67575482221946	2.45962877653984e-11	2.82660987734969e-10
ENSMUSG00000015291	14567	Gdi1	565.982453403119	0.286691763564187	0.0924109848296338	3.10235589516467	0.00191986994564902	0.00589881157297575
ENSMUSG00000015305	70097	Sash1	277.191391993563	-0.00350187858924635	0.110397104401185	-0.031720746737346	0.974694749707107	0.983969653420451
ENSMUSG00000015312	17873	Gadd45b	298.426189171385	-0.0819575508537865	0.193771729596718	-0.422959278034822	0.672324972148656	0.775999453939559
ENSMUSG00000015314	30925	Slamf6	1.92624679683306	3.85098376932861	1.49645897282555	2.57339749318844	0.0100705473575081	0.0257310207992509
ENSMUSG00000015316	27218	Slamf1	0.732449012343809	3.56209815110061	1.85626529168758	1.91895962665024	0.0549894435277725	0.110433616936267
ENSMUSG00000015335	66220	Zdhhc12	39.1104268345778	1.09421422066167	0.251387247109466	4.35270377969967	1.34468784177499e-05	6.35071996875782e-05
ENSMUSG00000015337	13804	Endog	476.80389000869	-0.60391438745419	0.164784732734883	-3.66486856780481	0.000247465633321697	0.000916773528922157
ENSMUSG00000015340	13058	Cybb	315.689075475446	3.65558572064218	0.450178391097389	8.12030473459876	4.65014581211262e-16	1.00356519416225e-14
ENSMUSG00000015341	57437	Golga7	320.480475975837	0.512868672268251	0.159389935769013	3.21769796689985	0.00129223815761666	0.00412603271710425
ENSMUSG00000015341	628040	Golga7	320.480475975837	0.512868672268251	0.159389935769013	3.21769796689985	0.00129223815761666	0.00412603271710425
ENSMUSG00000015342	22439	Xk	57.0458543304498	-1.40368541634616	0.237691189673194	-5.90550040275415	3.51577927656869e-09	2.93812449742103e-08
ENSMUSG00000015354	76477	Pcolce2	124.019212084009	-0.755050430901064	0.163766737249033	-4.61052374605773	4.01655755661474e-06	2.08074404185771e-05
ENSMUSG00000015355	12506	Cd48	58.1348574869353	3.22473149753814	0.411294589936378	7.84044229231649	4.48962225929256e-15	8.44191379482838e-14
ENSMUSG00000015357	270166	Clpx	745.704226898372	-0.347883279622139	0.0982193174830002	-3.54190284087803	0.000397251766121415	0.00140777142224145
ENSMUSG00000015363	67976	Trabd	486.860036742387	-0.0452008276225374	0.0999204783656853	-0.452368006657385	0.651003891090219	0.759435466908128
ENSMUSG00000015365	83456	Mov10l1	1.79075910742141	4.50608815127841	1.32049245677158	3.41243005832474	0.000643864471256751	0.00218896544900022
ENSMUSG00000015377	69440	Dennd6b	183.320822045	-0.485595078923758	0.124062639406727	-3.91411210696384	9.07374739178328e-05	0.000365141797117539
ENSMUSG00000015396	12522	Cd83	67.9921151896296	2.37658009574272	0.33920114050264	7.00640361120549	2.44521878541708e-12	3.21096254447244e-11
ENSMUSG00000015401	57394	Cltrn	0.290492697591775	0.606981947838657	2.93468064280683	0.20683066463345	0.836142107012827	NA
ENSMUSG00000015405	70008	Ace2	8.52430275668092	-2.17047714217764	0.513885780307776	-4.22365674504108	2.4037005817553e-05	0.000108318272369942
ENSMUSG00000015437	14939	Gzmb	1.55507294139598	3.82171754143348	1.31788892970591	2.89987832456132	0.00373307541034888	0.0107496572923432
ENSMUSG00000015441	14943	Gzmf	0	NA	NA	NA	NA	NA
ENSMUSG00000015443	245839	Gzmn	0	NA	NA	NA	NA	NA
ENSMUSG00000015451	625018	C4a	4.38480731406493	0.00319406527353275	0.614400845971929	0.00519866678972426	0.995852082715425	0.997357363945635
ENSMUSG00000015452	11596	Ager	5.99175826517835	1.47519296351216	0.705013237527502	2.09243299981954	0.0363997993849479	0.0782124247097745
ENSMUSG00000015461	12915	Atf6b	190.293355233692	0.367593765352423	0.136545282647287	2.6921015374948	0.00710033245435539	0.0189445499149045
ENSMUSG00000015467	81701	Egfl8	10.3393047396854	-0.142844696798027	0.436772908293311	-0.327045689157307	0.743633328643631	0.830714753129554
ENSMUSG00000015468	18132	Notch4	232.879585987499	-0.30983013817672	0.111375125734003	-2.78186117532821	0.00540481540539505	0.0149076168755539
ENSMUSG00000015474	54397	Ppt2	150.764656536282	0.0131330664170587	0.143171969241572	0.0917293132631248	0.926913106954006	0.956230487582368
ENSMUSG00000015476	260297	Prrt1	16.3936618256323	-0.00914353107943102	0.369608999770171	-0.0247383886353325	0.98026363473862	0.987909308805878
ENSMUSG00000015478	54197	Rnf5	184.925197133282	-0.137739526905513	0.128495397636852	-1.07194132582699	0.283746386869124	0.415267256234729
ENSMUSG00000015484	329274	Fam163a	0.105905717905229	-0.835687828851884	4.32794324778021	-0.193091217007179	0.846887531034479	NA
ENSMUSG00000015488	381356	Cacfd1	425.337644446111	-0.377585587052994	0.0960580840464644	-3.93080489582065	8.46619549326797e-05	0.000343159265147401
ENSMUSG00000015501	15273	Hivep2	440.475690379002	-0.531172802708721	0.114257542398254	-4.64890799818952	3.33697005791599e-06	1.75028117245414e-05
ENSMUSG00000015519	67719	2310057J18Rik	0	NA	NA	NA	NA	NA
ENSMUSG00000015522	11863	Arnt	432.024618166575	-0.301237112074433	0.109110555343759	-2.76084299200355	0.00576523851116094	0.0157636886420878
ENSMUSG00000015533	16398	Itga2	18.3268658396632	-0.912607548286479	0.358394834842341	-2.54637472297261	0.0108848273517745	0.0275842927998137
ENSMUSG00000015536	17434	Mocs2	447.276477682747	-0.25529940637537	0.10522859783465	-2.42614091253531	0.0152603437479923	0.0370204295256084
ENSMUSG00000015542	66176	Nat9	151.200638511457	0.198849796209687	0.12640669174868	1.57309548615541	0.115696709974468	0.203933763183435
ENSMUSG00000015568	16956	Lpl	6355.34378846279	-0.857876536283601	0.220260645528759	-3.89482439872169	9.82698953602287e-05	0.000392865188571228
ENSMUSG00000015575	11974	Atp6v0e	417.899965267099	1.22430711657298	0.153013733987467	8.00128906515843	1.23123363733273e-15	2.48428192469628e-14
ENSMUSG00000015579	18091	Nkx2-5	0	NA	NA	NA	NA	NA
ENSMUSG00000015597	57908	Zfp318	132.369927734248	0.0226753021003578	0.146666997563427	0.154603983698185	0.877133529225893	0.924706095638406
ENSMUSG00000015599	106763	Ttbk1	12.7925635750714	-0.0378607495204824	0.413746455574327	-0.0915071271557539	0.92708964334711	0.956314719868364
ENSMUSG00000015605	20807	Srf	1036.12064089525	-0.65711176627629	0.105391707057039	-6.23494755541489	4.51929470271408e-10	4.32141476862465e-09
ENSMUSG00000015619	14462	Gata3	4.67910020223079	-0.451369158463565	0.63621787060853	-0.709456900404006	0.478040988335311	0.613157645660495
ENSMUSG00000015627	14464	Gata5	0	NA	NA	NA	NA	NA
ENSMUSG00000015647	16776	Lama5	349.047687513342	-0.595505662409776	0.143076425425241	-4.16215082701332	3.15263995378197e-05	0.00013853883485586
ENSMUSG00000015652	70358	Steap1	4.73500299469913	2.92993779048432	0.776129573836411	3.77506268186847	0.000159967433809729	0.000614651842032542
ENSMUSG00000015653	74051	Steap2	24.6251567786963	1.05500023838266	0.279651767284445	3.7725498702448	0.00016158765519992	0.00062052245491804
ENSMUSG00000015656	15481	Hspa8	11116.5619076157	-0.333999853166794	0.102030424639327	-3.27353193272955	0.00106212388839493	0.00345812166344317
ENSMUSG00000015659	321007	Serac1	55.5552612651843	-1.15752766318953	0.278696318436354	-4.15336546131618	3.27620867458136e-05	0.000143431641131706
ENSMUSG00000015665	245533	Awat1	0.148193662089708	0.606959920202541	4.32794324778021	0.140242116278639	0.888468696717425	NA
ENSMUSG00000015668	72621	Pdzd11	100.154037493035	0.983510390747527	0.171297516514776	5.74153327355852	9.38231181535088e-09	7.3330461133008e-08
ENSMUSG00000015671	19166	Psma2	1016.11722772702	0.245250881749068	0.111043843136363	2.20859504518316	0.0272028202965604	0.0606959540311898
ENSMUSG00000015672	75398	Mrpl32	250.126931613404	0.0758788930096337	0.14602321225273	0.519635829393385	0.603317420582305	0.720870106323794
ENSMUSG00000015697	84505	Setdb1	184.447729257807	-0.169758620859909	0.135702060828112	-1.25096568043233	0.210946998916534	0.33023133404478
ENSMUSG00000015702	71790	Anxa9	7.95256430709555	1.56807535018829	0.588653699469936	2.66383333970431	0.00772558273020557	0.0203908041237074
ENSMUSG00000015709	11864	Arnt2	37.7871431797786	-0.609142050767366	0.255886960531757	-2.38051227581707	0.0172885849905719	0.041201939897725
ENSMUSG00000015711	229589	Prune1	756.087966907695	-0.413360814245089	0.138457360897452	-2.98547373404901	0.00283139452861208	0.00839053506516225
ENSMUSG00000015714	76893	Cers2	379.801037892528	0.450016753227168	0.0983842763636634	4.57407189298975	4.78335583523969e-06	2.43664653957358e-05
ENSMUSG00000015721	23968	Nlrp5	0	NA	NA	NA	NA	NA
ENSMUSG00000015733	12343	Capza2	2818.2012552787	-0.397555207681281	0.133215871478546	-2.98429311214097	0.00284234345277338	0.00841926774100706
ENSMUSG00000015745	67220	Plekho1	482.848983411359	1.62246661962866	0.157487948440013	10.3021636620447	6.88940162670305e-25	5.38254529416486e-23
ENSMUSG00000015747	22365	Vps45	108.371802728219	0.15404175230252	0.159544620382445	0.965508908625478	0.334289976076478	0.470386251153477
ENSMUSG00000015748	70767	Prpf3	154.588463963111	-0.0973690537497686	0.152848236862838	-0.637030925238248	0.524104699991943	0.653898145440554
ENSMUSG00000015749	66471	Anp32e	934.073026646161	-0.313877082971942	0.0815018523706509	-3.85116502069799	0.000117557248176585	0.000462812783495199
ENSMUSG00000015750	226548	Aph1a	317.174429205558	0.0667186476811332	0.125027379045476	0.533632298705277	0.593595957444348	0.713185534613204
ENSMUSG00000015755	68652	Tab2	1223.78259295521	-1.03696072850053	0.10055805681906	-10.3120601302629	6.21544516337144e-25	4.89393469367492e-23
ENSMUSG00000015757	67418	Ppil4	163.043876449873	-0.321981793667566	0.140645262860293	-2.28931843930926	0.0220608571052149	0.0507394678993401
ENSMUSG00000015759	12793	Cnih1	559.140445429775	0.437926149912107	0.134911725704311	3.24601992618431	0.00117030647759046	0.00376955379814492
ENSMUSG00000015766	13860	Eps8	117.717932254657	0.644342845072928	0.14202950689402	4.53668296936162	5.71459120146157e-06	2.87613020843598e-05
ENSMUSG00000015776	20933	Med22	208.199423194835	0.116981920633671	0.119545389646172	0.978556521333966	0.327799151088449	0.463647988807092
ENSMUSG00000015787	80908	Abo	0	NA	NA	NA	NA	NA
ENSMUSG00000015790	20930	Surf1	258.640446572524	0.182754238649805	0.111743230179052	1.63548376359775	0.101947675613173	0.183954820278823
ENSMUSG00000015804	66999	Med28	416.199749178516	0.175650047679845	0.130512757586301	1.34584580793718	0.178352248821555	0.289584164821478
ENSMUSG00000015806	110391	Qdpr	228.520226792858	-0.171302999311365	0.142838783851495	-1.19927511767017	0.230420986977269	0.354035813286135
ENSMUSG00000015812	14714	Gnrh1	8.33756152327605	-0.24941134154898	0.468644752617745	-0.532197021637015	0.594589545566617	0.713911214557202
ENSMUSG00000015829	21960	Tnr	0.530305487319077	1.57781171301671	1.79722441770122	0.877915800317717	0.379989413986608	NA
ENSMUSG00000015837	18412	Sqstm1	5930.08947748407	-0.316325680325208	0.103539906935149	-3.0551087951367	0.00224978894582558	0.00680302967011795
ENSMUSG00000015839	18024	Nfe2l2	409.204710294027	0.150189816254146	0.117426810640231	1.27900788103914	0.200894280635925	0.318176004932689
ENSMUSG00000015843	20183	Rxrg	578.209476603633	-0.714958730493405	0.124303893682554	-5.75170020272461	8.83503723580644e-09	6.94447813380966e-08
ENSMUSG00000015846	20181	Rxra	1501.68038196385	-1.09923849350609	0.130499876826866	-8.42329142551185	3.66052452655458e-17	9.23469247581484e-16
ENSMUSG00000015850	229595	Adamtsl4	231.701085733089	-0.988519349496153	0.179181622554285	-5.51685678142954	3.45116454684987e-08	2.48713349198616e-07
ENSMUSG00000015852	80891	Fcrls	171.190600612464	2.11874766855992	0.253142379791815	8.36978648262051	5.77227296225116e-17	1.39677918487511e-15
ENSMUSG00000015854	11801	Cd5l	4.0584299819914	5.45814276269953	1.22906051298604	4.44090645255441	8.95807334511377e-06	4.36048984345468e-05
ENSMUSG00000015869	67763	Prpsap1	147.886401627971	0.388361768988483	0.128166247678399	3.03014074316179	0.00244439800963113	0.00732447312028165
ENSMUSG00000015879	58227	Fam184b	2.60910235028915	-0.579565656429978	0.892216419977301	-0.649579679832302	0.515963762288358	0.646663032795277
ENSMUSG00000015880	54392	Ncapg	8.62747724059446	5.71229389696217	1.07154860429292	5.3308770820821	9.77395595578115e-08	6.60454677172916e-07
ENSMUSG00000015882	209707	Lcorl	40.8741718185218	-0.141634506620288	0.201004753778895	-0.704632621654737	0.481038891972964	0.615827884436164
ENSMUSG00000015882	100041576	Lcorl	40.8741718185218	-0.141634506620288	0.201004753778895	-0.704632621654737	0.481038891972964	0.615827884436164
ENSMUSG00000015889	16993	Lta4h	270.745245827646	0.362146120302083	0.0983238062403815	3.68319875063329	0.000230325438737626	0.000858640626712472
ENSMUSG00000015890	71761	Amdhd1	0.571167870207416	1.83074077240035	2.29530879491174	0.797601079409771	0.425102024445031	NA
ENSMUSG00000015932	56431	Dstn	515.33089827498	0.392064284005236	0.138634230169041	2.8280481921902	0.00468327558105506	0.0131422505759887
ENSMUSG00000015937	26914	Macroh2a1	594.860423320136	-0.199375481860442	0.0898535710438019	-2.21889324535861	0.026493988163962	0.0593485609946462
ENSMUSG00000015942	114674	Gtf2ird2	119.457390292253	-0.454879224360911	0.138649773116687	-3.28077871413528	0.00103520928120019	0.00337430683718503
ENSMUSG00000015943	69168	Bola1	238.622454021115	-0.127617816721882	0.1373345260078	-0.929247876929603	0.352760640743582	0.489629251327761
ENSMUSG00000015944	80909	Castor2	1174.06954498999	-0.289802033679175	0.128260017426114	-2.25948849450391	0.0238530151997769	0.0542118871780249
ENSMUSG00000015947	14129	Fcgr1	103.744921257266	4.07964419616664	0.448895146717945	9.08818958278917	1.00701830015021e-19	3.7870275888298e-18
ENSMUSG00000015950	17969	Ncf1	123.507171492984	3.14860258973738	0.335656368817718	9.38043452244837	6.57013984655522e-21	2.95612296622798e-19
ENSMUSG00000015957	22411	Wnt11	130.190447083433	0.041501040405143	0.161875882163811	0.256375686423416	0.7976607600403	0.86943426919009
ENSMUSG00000015961	11566	Adss	206.770899503668	0.425168574170762	0.114236782524077	3.721818531445	0.000197793153067129	0.000747825828646798
ENSMUSG00000015962	69428	1700016C15Rik	4.44007331315479	-0.739244550039588	0.735928251202162	-1.00450628010544	0.315134645715428	0.450098252272136
ENSMUSG00000015966	50905	Il17rb	0.966568194492173	0.147075854729167	1.28527257343773	0.114431644904537	0.908895629742822	0.945482231961917
ENSMUSG00000015968	12289	Cacna1d	9.17632789261226	2.61586721770009	0.517431959071778	5.05548057447534	4.29308327135765e-07	2.60964051570434e-06
ENSMUSG00000015970	218865	Chdh	6.92383596371	-3.25238359602906	0.755891953119739	-4.30270964336335	1.68721898107204e-05	7.81463074482286e-05
ENSMUSG00000015971	56249	Actr8	312.294090849944	-0.379879527839755	0.108347561100785	-3.50611978691787	0.000454690539378907	0.00159561232629886
ENSMUSG00000015980	76612	Lrrc27	40.010022129793	-0.101216339621204	0.272876751919725	-0.370923279132916	0.71069467580811	0.805661806437437
ENSMUSG00000015981	57740	Stk32c	10.1951343124365	0.587827747729178	0.473378074663346	1.24177223067888	0.214320611174062	0.334318260287538
ENSMUSG00000015994	14272	Fnta	700.099825885959	-0.241372006972161	0.0827522204647842	-2.91680399168115	0.00353637928240949	0.0102476706721576
ENSMUSG00000016018	72198	Mtrex	339.029796240136	-0.635089853432367	0.120239387203193	-5.28187866060167	1.27865877695345e-07	8.45323875600221e-07
ENSMUSG00000016024	16803	Lbp	182.449582690815	0.243458876410437	0.146110255132349	1.66626823141133	0.0956600012678496	0.174515218169612
ENSMUSG00000016028	12614	Celsr1	5.39602219980267	0.160111287512255	0.612449950355759	0.261427545906813	0.793762816869674	0.866873115871595
ENSMUSG00000016087	14247	Fli1	148.500174942241	0.499085851264104	0.160385587821712	3.11178739961908	0.00185958366782442	0.00573582677771031
ENSMUSG00000016128	243362	Stard13	90.9785337886156	0.0615301442133611	0.188620713898186	0.32621096030086	0.744264749457025	0.831143742648491
ENSMUSG00000016150	23963	Tenm1	0.0517834982841109	0.606966676079468	4.32794324778021	0.140243677268823	0.888467463415622	NA
ENSMUSG00000016179	215303	Camk1g	4.43653010628843	0.12639171053957	0.670691230444227	0.18844992271012	0.85052396800485	0.906562932847219
ENSMUSG00000016181	215193	Utp25	97.2244620161873	-0.29793013063134	0.149030227617915	-1.99912551563147	0.0455947750212431	0.0944265776331241
ENSMUSG00000016194	15483	Hsd11b1	90.601647792257	-1.0940669065231	0.257683076837132	-4.24578486081412	2.17829566488153e-05	9.89139574611783e-05
ENSMUSG00000016200	329324	Syt14	3.03255393115917	1.2931702401787	0.846544016676378	1.52758771511471	0.126614933808362	0.219278049727223
ENSMUSG00000016206	14991	H2-M3	46.891548478976	1.62813368956941	0.208616300575254	7.80444138391809	5.97656760655717e-15	1.10624126028809e-13
ENSMUSG00000016239	74365	Lonrf3	8.11373566272243	0.062405013337876	0.520231362279803	0.119956269196073	0.904517789861879	0.942679545537764
ENSMUSG00000016252	67126	Atp5e	5668.98123933565	-0.119858181827124	0.156385318349693	-0.766428607825632	0.443421316143166	0.579978162967867
ENSMUSG00000016253	57314	Nelfcd	330.867245403668	0.102035776969529	0.098709139039187	1.03370141774838	0.301275770109975	0.434953136950778
ENSMUSG00000016255	545486	Tubb1	0.443028274650396	-1.33162676771185	2.13930018004864	-0.622459054662244	0.533640059380348	NA
ENSMUSG00000016256	64138	Ctsz	1115.62722010179	2.17265628092612	0.227562216667255	9.54752644241908	1.32829791598266e-21	6.67693294076372e-20
ENSMUSG00000016257	66390	Prelid3b	699.921926197731	-0.262681492996023	0.121192847582087	-2.16746696060676	0.0301992663134683	0.0664548702053035
ENSMUSG00000016262	214791	Sertad4	110.387853951728	1.4251505785416	0.160913650951905	8.85661701236002	8.24793034270349e-19	2.64314041204888e-17
ENSMUSG00000016283	14990	H2-M2	1.54483731870706	4.46154127771498	1.44707304919218	3.08314862211386	0.00204822834235465	0.00625609396411057
ENSMUSG00000016308	22209	Ube2a	351.347098104183	-0.00108594818319944	0.112441532868904	-0.00965789202167448	0.992294236858544	0.994910213507644
ENSMUSG00000016319	11740	Slc25a5	735.771917588395	0.886608991119739	0.181747893123643	4.87823531751522	1.0703917769422e-06	6.09488334684289e-06
ENSMUSG00000016327	67821	Atp1b4	114.444275992907	1.20205416015625	0.305842765569171	3.93030110723475	8.48395484516983e-05	0.000343533703925449
ENSMUSG00000016344	66496	Ppdpf	455.748935259638	0.162402286983886	0.125265661009381	1.29646293864784	0.194816040505688	0.310697596999222
ENSMUSG00000016346	16536	Kcnq2	0.304966392654881	-0.854243893578295	3.41759421749675	-0.249954745711149	0.802622345613405	NA
ENSMUSG00000016349	13628	Eef1a2	21022.1587328125	-0.518276466107903	0.103949522995777	-4.98584746876575	6.16908006919461e-07	3.64449434216752e-06
ENSMUSG00000016356	73368	Col20a1	52.4947621549048	-0.750708980150911	0.201986712850105	-3.71662556193989	0.000201901323262851	0.000761835449833261
ENSMUSG00000016382	102866	Pls3	326.313825517702	-0.00474980213350735	0.0954968370561487	-0.0497377953022113	0.960331337422706	0.975282082246548
ENSMUSG00000016386	77015	Mpped2	41.6647910150368	-1.13379785523724	0.287882167079278	-3.93840947753117	8.20235279891096e-05	0.000333538078207884
ENSMUSG00000016409	67050	Nkap	142.040125314401	0.246236066537972	0.145387493025088	1.69365370716917	0.0903311060045204	0.166592642050435
ENSMUSG00000016427	54405	Ndufa1	1088.70035511303	-0.296566881477898	0.129716758511586	-2.2862649736303	0.0222387616887124	0.0510787054876225
ENSMUSG00000016458	22431	Wt1	0.168388233215493	-0.835692894940438	3.99313128656854	-0.20928259928528	0.834227634770071	NA
ENSMUSG00000016477	13557	E2f3	187.310636414583	-0.626604662040486	0.175902828544741	-3.56222050108256	0.000367731319062828	0.00131099402163945
ENSMUSG00000016481	12946	Cr1l	354.294025063163	-0.13378883416744	0.110480048210717	-1.21097733332146	0.225904091961583	0.348476986429144
ENSMUSG00000016487	67533	Ppfibp1	415.004207162048	0.7371083295813	0.137982042360051	5.342059857745	9.18962974627155e-08	6.2410837869136e-07
ENSMUSG00000016493	17221	Cd46	23.9312630646208	-0.322667543032325	0.297564717325163	-1.08436089443941	0.278204815364786	0.409057879007075
ENSMUSG00000016494	12490	Cd34	962.091078626065	0.62809385924906	0.127497460887338	4.9263244528773	8.3790821448635e-07	4.85615752714243e-06
ENSMUSG00000016495	67759	Plgrkt	162.558726377794	0.40283470608589	0.137775030455254	2.9238585885613	0.0034572176644727	0.0100355899283952
ENSMUSG00000016496	60533	Cd274	43.3623678001349	-0.109129889002079	0.249122238805343	-0.438057595842938	0.661344532386144	0.767589205925462
ENSMUSG00000016498	58205	Pdcd1lg2	0.578572316417818	0.904550486708085	1.78535349112376	0.506650638769989	0.612399970740746	NA
ENSMUSG00000016503	66596	Gtf3a	69.7077975120526	-0.35620292202421	0.159987316711909	-2.22644475415279	0.0259844055784081	0.0583482349854985
ENSMUSG00000016510	76366	Mtif3	113.591036505384	-0.462426436483123	0.151163067830566	-3.05912312524275	0.00221985895489379	0.0067229210624048
ENSMUSG00000016520	140887	Lnx2	72.4090527075902	0.134201004349007	0.166188454891638	0.807523028218249	0.419365212665703	0.556603976539315
ENSMUSG00000016524	329244	Il19	0.0926897260507086	-0.114347064600714	4.32794324778021	-0.0264206478814995	0.978921825269675	NA
ENSMUSG00000016526	226419	Dyrk3	1.23645949197448	3.34785141678541	1.37344331774447	2.43756067216769	0.0147867325891643	0.0360188723625117
ENSMUSG00000016528	17164	Mapkapk2	3488.37258787978	-0.797017417568133	0.0834711494465212	-9.54841790071156	1.31691952913957e-21	6.63628673721659e-20
ENSMUSG00000016529	16153	Il10	1.1024205965834	2.82052466050528	1.59617759206435	1.76704940260279	0.0772199550830673	0.145892083101452
ENSMUSG00000016534	16784	Lamp2	1162.81653858809	0.852033942952195	0.10069208659232	8.46177660814491	2.63334592984815e-17	6.79646016747109e-16
ENSMUSG00000016541	54138	Atxn10	481.090962633995	0.665004846653163	0.0811658688341427	8.19315872798772	2.54458244871506e-16	5.70535577516678e-15
ENSMUSG00000016552	239554	Foxred2	21.0740225636048	0.329658398015271	0.30723267117038	1.0729926500312	0.283274413893166	0.41475719916064
ENSMUSG00000016554	55944	Eif3d	318.247042771262	0.538250965301749	0.11536861125665	4.66548881397517	3.07884245525881e-06	1.62376314418242e-05
ENSMUSG00000016559	15081	H3f3b	1236.28600548493	1.10347261452801	0.129566290911763	8.51666437900503	1.64214510381325e-17	4.36684945350445e-16
ENSMUSG00000016619	18141	Nup50	215.199494050278	0.0973505271341646	0.109911863199229	0.885714465213866	0.375771411500529	0.514112831169224
ENSMUSG00000016624	271305	Phf21b	16.1410753786872	-0.578417595445883	0.345292682377986	-1.67515161764332	0.0939044875549305	0.171825776656203
ENSMUSG00000016626	76858	Nlrp14	0	NA	NA	NA	NA	NA
ENSMUSG00000016637	67042	Ift27	121.69949931381	1.07983312701797	0.18104204424753	5.96454338276012	2.4531908680696e-09	2.10510720850059e-08
ENSMUSG00000016664	23970	Pacsin2	641.410641329575	-0.375653427397863	0.1052663658663	-3.56859880462658	0.000358895507642578	0.00128266963609068
ENSMUSG00000016756	12763	Cmah	34.6880742537635	0.204918833566716	0.257890910992341	0.79459501995711	0.426849116156362	0.563933502040331
ENSMUSG00000016757	223723	Ttll12	187.86555875467	0.67755604011542	0.14310289360516	4.73474730696145	2.19328187392175e-06	1.18684517403062e-05
ENSMUSG00000016758	12124	Bik	14.03671281404	0.875514852264811	0.420087213776545	2.08412639935887	0.0371486713082625	0.079567077628376
ENSMUSG00000016763	64706	Scube1	7.17562055386907	-0.359959564569671	0.572497770438411	-0.628752779760206	0.529510918434622	0.658401800190406
ENSMUSG00000016831	268741	Tox4	599.231085369873	-0.326631727979333	0.0961514087558911	-3.39705608275158	0.000681150054087108	0.00230522861656042
ENSMUSG00000016833	68735	Mrps18c	74.5960874512357	0.682091942425377	0.233676204666198	2.91896191740931	0.00351199125418592	0.0101857852821044
ENSMUSG00000016918	240725	Sulf1	166.669317625858	0.237177205162928	0.114774926628467	2.06645486196374	0.0387855502783504	0.0824249169173124
ENSMUSG00000016921	67996	Srsf6	946.181975914435	0.491924691471323	0.0825747616040192	5.95732499756172	2.56400036871737e-09	2.19086712302824e-08
ENSMUSG00000016933	18803	Plcg1	377.552205690101	0.0847005345456498	0.11716457433833	0.722919321168395	0.469729452404663	0.605237571728508
ENSMUSG00000016940	70382	Kctd2	243.213305533216	0.0067153049025407	0.118728886932749	0.0565599920627946	0.954895705207422	0.972161863218648
ENSMUSG00000016942	71753	Tmprss6	2.72275880997598	0.032725807878753	0.792445645905986	0.0412972271951072	0.967058943564114	0.979333048756056
ENSMUSG00000016946	69259	Kctd5	192.726675596792	0.506870259960232	0.110011072819501	4.60744765930856	4.07641769628381e-06	2.10904392977394e-05
ENSMUSG00000016982	195236	Pom121l2	0	NA	NA	NA	NA	NA
ENSMUSG00000016984	68145	Etaa1	33.6192960207945	0.455468176777523	0.264691147912061	1.72075333977109	0.0852955927233905	0.158856441146206
ENSMUSG00000016995	17183	Matn4	34.5343793599315	0.263470579774347	0.40494155903235	0.65063852770246	0.515279853623345	0.646109971266119
ENSMUSG00000016998	20941	Svs4	0.082965101899071	0	4.32794324778021	0	1	NA
ENSMUSG00000017000	20945	Svs6	0	NA	NA	NA	NA	NA
ENSMUSG00000017002	20568	Slpi	5.06052091142458	1.85157420352005	0.711132194553533	2.60369902769275	0.00922237038900495	0.023783945743497
ENSMUSG00000017003	64335	Svs3a	0	NA	NA	NA	NA	NA
ENSMUSG00000017004	20944	Svs5	0	NA	NA	NA	NA	NA
ENSMUSG00000017007	19668	Rbpjl	0.561872587685758	0.484609030089937	1.82871041314544	0.265000421393344	0.791009137192447	NA
ENSMUSG00000017009	20971	Sdc4	448.647384194233	-0.026705871093291	0.120384213128131	-0.221838648103025	0.824439492120451	0.888105325067974
ENSMUSG00000017049	67929	Ccdc70	0	NA	NA	NA	NA	NA
ENSMUSG00000017057	16164	Il13ra1	108.583782516275	2.14702188916795	0.165581493351596	12.9665571055635	1.89345898881877e-38	9.78626995836406e-36
ENSMUSG00000017064	28078	Prl5a1	0	NA	NA	NA	NA	NA
ENSMUSG00000017119	17966	Nbr1	815.087707541381	-0.231639931024362	0.0964639764675225	-2.40131020415015	0.0163364812200029	0.0392718487718067
ENSMUSG00000017132	19157	Cyth1	489.469690107361	-0.658819870792007	0.107879428669909	-6.10700185303977	1.01520060817898e-09	9.21359687485985e-09
ENSMUSG00000017144	74194	Rnd3	126.197587760505	0.632931100202206	0.160933560520955	3.93287203833283	8.39369255811899e-05	0.000340425877050311
ENSMUSG00000017146	12189	Brca1	8.00413546825982	2.51860368397087	0.643622949663199	3.91316637371123	9.1093726137933e-05	0.000366429103524709
ENSMUSG00000017165	14459	Gast	0	NA	NA	NA	NA	NA
ENSMUSG00000017167	53321	Cntnap1	25.421384227432	-1.03801627452549	0.265569707385344	-3.90863959879023	9.2817308331654e-05	0.000372692925107799
ENSMUSG00000017176	68106	Nt5c3b	125.27871614443	0.60116086331971	0.150576169829532	3.9924037382561	6.54068874879051e-05	0.000270831271794105
ENSMUSG00000017188	52469	Coa3	751.815191056347	-0.0243701389165	0.132646033397755	-0.183723088374781	0.854230695310991	0.909638589477607
ENSMUSG00000017195	69376	Zpbp2	0.387479881123861	2.38985614464907	2.24646864958807	1.06382795285716	0.287406645888151	NA
ENSMUSG00000017204	57911	Gsdma	2.54079000091788	0.177874252545445	0.922659004736175	0.192784389067233	0.847127829865948	0.904090414920734
ENSMUSG00000017210	23989	Med24	610.205091788273	-0.443394680543527	0.101670771618542	-4.36108306728602	1.29420217522651e-05	6.13095963479219e-05
ENSMUSG00000017211	76758	Gsdma2	0	NA	NA	NA	NA	NA
ENSMUSG00000017221	22123	Psmd3	1288.35839973743	-0.135256720550804	0.0701050439475856	-1.92934363826845	0.053688215682682	0.108262641408145
ENSMUSG00000017264	50912	Exosc10	273.02973194034	-0.252060915514209	0.110454553693537	-2.28203280974334	0.0224874032666649	0.0515294552465914
ENSMUSG00000017286	67201	Glod4	211.036768333139	0.193666483722162	0.103771365178259	1.86628058125169	0.0620021201753691	0.122036591775697
ENSMUSG00000017288	68299	Vps53	254.373942394149	0.102292500556094	0.110825312574347	0.923006650556218	0.356003739436167	0.492799573827757
ENSMUSG00000017291	216965	Taok1	539.642649771224	-0.338587599397781	0.0878343101766554	-3.85484440780376	0.000115803254544734	0.000456442354684827
ENSMUSG00000017299	76233	Dnttip1	126.321150790911	0.0139592192686966	0.129989753675838	0.107387073780503	0.914481908834048	0.948604639667009
ENSMUSG00000017300	21925	Tnnc2	6.88378222864744	-0.418445877732325	0.518240707439771	-0.807435370717102	0.419415695557715	0.55663432811146
ENSMUSG00000017307	170789	Acot8	63.903783603293	-0.026630830235706	0.175642417317317	-0.15161958393908	0.879486986239164	0.926287099473066
ENSMUSG00000017309	52685	Cd300lg	407.834815870565	-0.888591057730697	0.116473032011695	-7.62915708798129	2.36293568953623e-14	4.08487947632778e-13
ENSMUSG00000017310	78239	Spint4	0	NA	NA	NA	NA	NA
ENSMUSG00000017311	217212	Pyy	0	NA	NA	NA	NA	NA
ENSMUSG00000017314	50997	Mpp2	28.9520680312941	-1.11364577915601	0.276535551859294	-4.02713420270335	5.64608095539107e-05	0.000236263346103006
ENSMUSG00000017316	19064	Ppy	0	NA	NA	NA	NA	NA
ENSMUSG00000017344	22370	Vtn	414.777808509066	-0.0179874158763494	0.123374966878972	-0.145794696698841	0.884083462590923	0.928972024993235
ENSMUSG00000017376	18099	Nlk	110.20470711582	-0.697799122794646	0.133544666619083	-5.22521146265628	1.73956189596468e-07	1.12602277254207e-06
ENSMUSG00000017386	22032	Traf4	109.454289161797	1.48352864524715	0.201457155386133	7.36399083171638	1.78491959350766e-13	2.72152982196171e-12
ENSMUSG00000017390	11676	Aldoc	8.88088045078664	1.47199811850254	0.510072736100658	2.88585923991055	0.00390346694976148	0.0111859799980583
ENSMUSG00000017400	217154	Stac2	32.4492678438441	5.20434585516239	0.673023697967307	7.73278247241629	1.0522100600179e-14	1.90218817755882e-13
ENSMUSG00000017404	19921	Rpl19	922.002240930107	0.859036023575035	0.126108306261979	6.81189089789584	9.63241497345495e-12	1.16753210234475e-10
ENSMUSG00000017405	140859	Nek8	26.3749881724347	1.23378188644694	0.266450562314848	4.63043453813042	3.64899135128294e-06	1.90255350925531e-05
ENSMUSG00000017412	12298	Cacnb4	4.94578324303366	-0.34583856582039	0.567301021984861	-0.60962091097664	0.542112956296506	0.669200248641599
ENSMUSG00000017417	72324	Plxdc1	86.9240689870857	-0.169775399764296	0.172100432938375	-0.986490253775762	0.323892595541475	0.459379612181925
ENSMUSG00000017418	75869	Arl5b	157.59430305908	-0.867244547748062	0.14235760976311	-6.09201397235597	1.11498949806158e-09	1.00513610520694e-08
ENSMUSG00000017421	22680	Zfp207	592.415189833384	0.262031549609095	0.0756561937283827	3.46345139368006	0.000533292935178794	0.00184605627587136
ENSMUSG00000017428	69077	Psmd11	1084.92932666009	-0.257620469052418	0.0821050399285737	-3.13769373081765	0.00170282702302906	0.00529689572580198
ENSMUSG00000017446	56745	C1qtnf1	78.9269721755467	-0.310611878849107	0.171968100975744	-1.80621799674881	0.07088429488157	0.136324275539339
ENSMUSG00000017453	19193	Pipox	1.69739334799244	1.01125052263301	1.16567467753694	0.867523797265433	0.385655078698874	0.523901430201725
ENSMUSG00000017466	21858	Timp2	2398.19602359389	0.368733305780718	0.120612059136143	3.0571844011427	0.00223426781195298	0.00676116743515031
ENSMUSG00000017478	76014	Zc3h18	417.285340201072	-0.553018156080514	0.106817326116936	-5.17723272229368	2.25201232336456e-07	1.43288549248925e-06
ENSMUSG00000017485	21974	Top2b	483.942960791844	-0.0781926283236983	0.0930209762566045	-0.840591353373875	0.400576904359967	0.538223480948131
ENSMUSG00000017491	218772	Rarb	26.4895143460827	-1.42561588754373	0.326943567782976	-4.36043411776202	1.29804660903052e-05	6.14628271041303e-05
ENSMUSG00000017493	16010	Igfbp4	1466.28989556046	0.839970650157086	0.153439275915446	5.4742871089926	4.39276375391777e-08	3.12548319758985e-07
ENSMUSG00000017499	23834	Cdc6	12.4643326995866	1.96874623852135	0.488681254926104	4.02869195140104	5.60880548761604e-05	0.000234898591759561
ENSMUSG00000017548	52615	Suz12	210.041845077514	-0.0792884512768577	0.116376631925319	-0.681309039152626	0.495675964916696	0.628662960097265
ENSMUSG00000017550	237877	Atad5	16.3323763132523	0.857979292196123	0.411474602093949	2.0851330503267	0.0370572249574427	0.0794022261527688
ENSMUSG00000017561	54394	Crlf3	96.5223035156187	0.71854379310085	0.182821200131708	3.93030891703587	8.48367926878015e-05	0.000343533703925449
ENSMUSG00000017588	16675	Krt27	0	NA	NA	NA	NA	NA
ENSMUSG00000017607	217169	Tns4	5.8081665606372	1.03386468176189	0.579777596990206	1.78320909108765	0.0745522731471284	0.141768883945912
ENSMUSG00000017615	21927	Tnfaip1	985.216418933962	-0.443063773514922	0.0946264549626526	-4.68224001089116	2.83756963063754e-06	1.50597396115747e-05
ENSMUSG00000017631	109934	Abr	259.2134741429	0.961321962094708	0.193035760365453	4.98002007646015	6.35776774434455e-07	3.74937169171308e-06
ENSMUSG00000017639	268451	Rab11fip4	9.08404347455641	0.423015599055871	0.556737810950052	0.759811154794769	0.447367474217019	0.583509001649103
ENSMUSG00000017652	21939	Cd40	22.9713521277684	1.55203054966152	0.336648988176393	4.61023381673824	4.02216337418693e-06	2.08311272182646e-05
ENSMUSG00000017664	228875	Slc35c2	288.917812563856	0.100852453775611	0.106103348536685	0.950511507567946	0.341852409506296	0.47785846174885
ENSMUSG00000017667	228876	Zfp334	51.2941753645444	-0.808042544787002	0.209570259282505	-3.85571191042782	0.000115393319772213	0.000455004527904636
ENSMUSG00000017670	140579	Elmo2	263.18831089816	-0.073965070682044	0.104874782134768	-0.705270315479619	0.480642029969407	0.615481951470258
ENSMUSG00000017677	78889	Wsb1	316.30300897295	0.773111666257675	0.132693969252091	5.826275833146	5.66779099641642e-09	4.58449691471772e-08
ENSMUSG00000017679	76080	Ttpal	90.5132537573288	0.535577378945948	0.149526724842713	3.58181709329433	0.000341212659539264	0.00122555658915413
ENSMUSG00000017686	59040	Rhot1	418.170335574357	-0.375821874810542	0.100032780273514	-3.75698719742623	0.000171971290978037	0.000657142239288018
ENSMUSG00000017688	30942	Hnf4g	0	NA	NA	NA	NA	NA
ENSMUSG00000017692	246104	Rhbdl3	129.222601626105	-0.430330317969174	0.171828143228724	-2.50442279060393	0.012265137177924	0.0305937841969328
ENSMUSG00000017697	11486	Ada	15.8532628798573	1.59620032167172	0.397407409881275	4.01653386923154	5.90603792456946e-05	0.000246170402079294
ENSMUSG00000017707	26943	Serinc3	2158.63777737942	-0.0119544398366143	0.100932452449671	-0.118440001669188	0.905719032071134	0.943443673683936
ENSMUSG00000017713	71776	Tha1	88.5498609716598	0.0293526802531172	0.165461070049277	0.177399313593074	0.859194746439856	0.913004823869903
ENSMUSG00000017715	74451	Pgs1	266.065033541169	-0.107016678926494	0.09682516216854	-1.10525690357445	0.269048286261667	0.398647920183506
ENSMUSG00000017716	11799	Birc5	38.0190355488996	4.03280737909148	0.769394408766853	5.24153455385133	1.59246648137867e-07	1.03646583355343e-06
ENSMUSG00000017718	71562	Afmid	8.44070493954425	-0.212430931437979	0.440266867170483	-0.482504924350166	0.629447301092126	0.742408967121942
ENSMUSG00000017720	73603	Trp53tg5	0.334010879902708	-0.773547413634153	2.30773949631297	-0.335197024997853	0.737476466063007	NA
ENSMUSG00000017721	78928	Pigt	562.868599256099	0.191722191926047	0.0887399974618231	2.16049354755197	0.0307344825796886	0.0674926424837982
ENSMUSG00000017723	67701	Wfdc2	0.0981968172259655	1.27980322155059	4.32302130575704	0.296043699772252	0.767196708733927	NA
ENSMUSG00000017724	18612	Etv4	88.6560498122156	0.511332119101106	0.202804551331716	2.52130494973334	0.0116920476136239	0.0293385539335015
ENSMUSG00000017733	75526	Eppin	0	NA	NA	NA	NA	NA
ENSMUSG00000017734	52840	Dbndd2	57.0746110176523	-0.899625945330593	0.196836694555951	-4.57041786522622	4.86752668997605e-06	2.47701932567148e-05
ENSMUSG00000017737	17395	Mmp9	66.0734553740489	0.584776031376552	0.5172975864929	1.13044415177177	0.25828911872133	0.386714236504928
ENSMUSG00000017740	57138	Slc12a5	17.6462927523306	-1.00273514537104	0.371410689691381	-2.69980152214857	0.00693808536415094	0.0185504984562107
ENSMUSG00000017747	80860	Ghdc	109.923967720403	0.258555604542646	0.148658841921802	1.73925480112816	0.0819899538814705	0.15350840612937
ENSMUSG00000017754	18830	Pltp	431.93529327814	1.53121010385337	0.224334593693691	6.82556389829073	8.75806075879131e-12	1.06732908533831e-10
ENSMUSG00000017756	20499	Slc12a7	142.341594229865	-0.0267918771090073	0.147435144657016	-0.181719746477912	0.855802668536959	0.910734477442479
ENSMUSG00000017760	19025	Ctsa	1176.39270327873	1.01916091176426	0.13380486717133	7.6167701019372	2.60101990512101e-14	4.45822774043572e-13
ENSMUSG00000017764	71971	Zswim1	69.852760708852	-0.683906565140092	0.173269328764329	-3.94707228346398	7.91126776194501e-05	0.000322939295823259
ENSMUSG00000017765	20498	Slc12a4	191.064908851609	0.112412424408529	0.152549992874367	0.736889083312558	0.461189803263911	0.597173692065951
ENSMUSG00000017767	75642	Spata25	0.319731806193702	-0.987955363050266	2.57403980419901	-0.383815107069682	0.701115490265214	NA
ENSMUSG00000017774	17913	Myo1c	1027.32881945335	0.24192183990857	0.0940530284964666	2.5721855401781	0.0101058715932268	0.0258081912713382
ENSMUSG00000017776	12928	Crk	672.372855411311	-0.474712864020324	0.114388691728387	-4.14999819341863	3.32477898695938e-05	0.000145248309579844
ENSMUSG00000017778	12867	Cox7c	4039.16922375348	-0.187517687481723	0.121936138350357	-1.53783521455249	0.12408891100329	0.215873447121499
ENSMUSG00000017781	18738	Pitpna	1644.4576051193	0.147073183882136	0.0706217455973093	2.08254812505993	0.0372924318819766	0.0798410567652684
ENSMUSG00000017801	21428	Mlx	99.2705292444018	0.00591534474247893	0.135841292205602	0.0435459987639529	0.965266297568669	0.978519048485801
ENSMUSG00000017802	67998	Retreg3	542.929932223203	-0.180239626913013	0.0718121815488065	-2.50987538639965	0.0120773772840418	0.0301665048221103
ENSMUSG00000017817	59091	Jph2	10950.2043180539	-0.796311265411074	0.115755550887436	-6.87924906672883	6.01688826268264e-12	7.49119312605893e-11
ENSMUSG00000017830	80861	Dhx58	45.3708891608295	2.45019751396904	0.412800487457753	5.93554898410773	2.92863866299055e-09	2.47205065033084e-08
ENSMUSG00000017831	271457	Rab5a	468.641230013905	-0.18638107021547	0.0899467342268798	-2.07212715189132	0.0382535848015395	0.0814920216491895
ENSMUSG00000017832	75482	Hspb9	1.44223729482719	-0.0237882260071358	1.27300095641477	-0.0186867306636847	0.98509101380446	0.990298716535659
ENSMUSG00000017837	71966	Nkiras2	297.543449348551	0.160742169079364	0.116124918755398	1.38421770970576	0.166291802240004	0.273963535574317
ENSMUSG00000017843	26931	Ppp2r5c	927.607670885447	-0.342100763303563	0.0778121937968522	-4.39649297379664	1.10013920255025e-05	5.27485868358836e-05
ENSMUSG00000017858	245866	Ift52	164.447289070127	0.0872544008451412	0.113636095086912	0.767840542025022	0.442581925082544	0.5794442623986
ENSMUSG00000017861	17865	Mybl2	11.9557884923462	3.13944301831982	0.7181124721083	4.3717984859708	1.2322723610011e-05	5.86631272530068e-05
ENSMUSG00000017868	27219	Sgk2	0.0402476891642483	0.606966676079468	4.32794324778021	0.140243677268823	0.888467463415622	NA
ENSMUSG00000017897	14049	Eya2	32.6400415761414	-0.626673232372934	0.280235963385457	-2.23623415354068	0.0253364371070411	0.0571132367218325
ENSMUSG00000017922	27372	Prl3c1	0	NA	NA	NA	NA	NA
ENSMUSG00000017929	56336	B4galt5	183.970188063774	0.28817815294674	0.160321138394313	1.79750565541744	0.0722553811154703	0.138340778604154
ENSMUSG00000017943	228858	Gdap1l1	1.43132506108632	1.88224321476115	1.36873351469008	1.3751714227494	0.169078305708304	0.277511659959919
ENSMUSG00000017950	15378	Hnf4a	0.0964101638055974	0	4.32794324778021	0	1	NA
ENSMUSG00000017969	19223	Ptgis	62.8599246394376	-0.212969455723213	0.266811552918677	-0.79820177722261	0.424753406259844	0.561868644833947
ENSMUSG00000017978	320405	Cadps2	6.8447219082644	-0.0315072215068911	0.462230509126721	-0.0681634398525896	0.945655530025237	0.966758559553619
ENSMUSG00000017999	228889	Ddx27	146.11631294902	0.266685416535475	0.129757888242446	2.05525398222563	0.0398544795536671	0.0843054616815267
ENSMUSG00000018001	19159	Cyth3	243.603357231446	0.325998993788186	0.0948964204113636	3.43531391779609	0.000591867783540108	0.00202999471036548
ENSMUSG00000018008	72318	Cyth4	298.383183023566	2.84191654034706	0.252406086062162	11.2593027556679	2.08401019102213e-29	3.11165877188393e-27
ENSMUSG00000018012	170758	Rac3	12.6752507168028	0.645069861280482	0.42202585316935	1.52850792537022	0.126386477311492	0.21905178187169
ENSMUSG00000018040	74778	Rrp7a	305.935694553634	0.11074982215142	0.0926559548615698	1.19528013409265	0.231977598794713	0.355846554149643
ENSMUSG00000018042	109754	Cyb5r3	1129.1990276622	1.05040128004708	0.110666430066037	9.49159812438403	2.27518993892637e-21	1.09715319614686e-19
ENSMUSG00000018068	70422	Ints2	54.8247282921801	0.179549518642035	0.224117983218152	0.801138382845723	0.423051537762191	0.560594556774623
ENSMUSG00000018076	76199	Med13l	222.469695598999	-0.529279457997084	0.117989876868904	-4.48580396931133	7.26395049161123e-06	3.58607519126641e-05
ENSMUSG00000018102	68024	H2bc4	711.117960043054	-0.0702190557799307	0.093516382981833	-0.750874376670149	0.452728262365179	0.588827176699891
ENSMUSG00000018126	207495	Baiap2l2	41.3766350920899	0.949176384085878	0.27431857971244	3.46012430175481	0.000539926086926048	0.00186741423029656
ENSMUSG00000018143	17135	Mafk	260.662875436014	-0.610399742203691	0.161240571555485	-3.78564610826653	0.000153309724291769	0.000590759723293669
ENSMUSG00000018160	19014	Med1	288.582572799983	-0.275750734868933	0.0955869814823222	-2.88481475816799	0.00391644033906074	0.0112151850993674
ENSMUSG00000018166	13867	Erbb3	87.4738348359037	0.577420703095697	0.301278943215087	1.91656508395101	0.0552932073847337	0.110933132403113
ENSMUSG00000018167	59045	Stard3	166.669146666669	0.294168000570157	0.126562166248607	2.32429650415686	0.0201096080546979	0.0468666168988954
ENSMUSG00000018168	22780	Ikzf3	2.87208564244087	2.02155985441712	0.914969099810691	2.20942964613274	0.0271447708778642	0.0606153120371074
ENSMUSG00000018169	17305	Mfng	68.9306086056316	0.238130937712148	0.189850449143313	1.25430800288699	0.209730076216998	0.32870920972755
ENSMUSG00000018171	75909	Vmp1	658.194897665562	0.0241163492342166	0.0894406561981938	0.269635200135121	0.787440917193316	0.862258070831468
ENSMUSG00000018189	56207	Uchl5	249.504499996148	0.0097293454367013	0.101595118951947	0.0957658747493877	0.923706520757573	0.954056207388838
ENSMUSG00000018196	69367	Glrx2	376.155248825253	-0.244534659425635	0.102430509230807	-2.38732250051228	0.0169715960029655	0.0405519749444968
ENSMUSG00000018199	20822	Ro60	124.231067526024	0.308027226679291	0.133258531753837	2.31150097952676	0.0208051991204629	0.0482256668205118
ENSMUSG00000018209	58231	Stk4	162.134844959099	0.360906850513535	0.126249080225605	2.85868894940542	0.00425395681460611	0.0120566658481461
ENSMUSG00000018211	192201	Wfdc15b	0.0579491280617172	0.606966676079468	4.32794324778021	0.140243677268823	0.888467463415622	NA
ENSMUSG00000018217	18858	Pmp22	760.501061001644	-0.508113079231273	0.213687390920866	-2.3778336992258	0.0174146778730705	0.0414730224347214
ENSMUSG00000018238	14566	Gdf9	7.34467513879585	1.16911708104402	0.524953610773633	2.22708646449935	0.0259414956511345	0.0583011180555155
ENSMUSG00000018239	67966	Zcchc10	97.7177168559549	-0.0708379571912499	0.208784846093911	-0.339286871229088	0.73439363196077	0.823450655806488
ENSMUSG00000018259	13529	Prl8a2	0	NA	NA	NA	NA	NA
ENSMUSG00000018263	21388	Tbx5	13.6376776576864	-0.563356145086212	0.408064698619481	-1.3805559436827	0.167415537329295	0.275432173191854
ENSMUSG00000018286	19175	Psmb6	1842.23950856648	0.211151241873059	0.0997168819020561	2.11750746559099	0.0342168023703294	0.074034788039795
ENSMUSG00000018287	216873	Spag7	902.506393163698	0.0617987334933581	0.103020782184676	0.599866669450994	0.548595097092718	0.674928672613398
ENSMUSG00000018293	18643	Pfn1	2665.32206579411	0.905385420503617	0.101490471630733	8.92089085759509	4.6255227289083e-19	1.55135876283868e-17
ENSMUSG00000018322	67145	Tomm34	206.814156042183	0.364424785362386	0.12318624711176	2.95832362708285	0.00309317193870732	0.00908613622391774
ENSMUSG00000018326	54401	Ywhab	826.244490814664	0.414197568514915	0.0907050123735688	4.56642425458299	4.96114188071165e-06	2.52338473099936e-05
ENSMUSG00000018334	16706	Ksr1	1270.09759244915	-0.816088984487132	0.135242818144807	-6.03425006726295	1.59702594261069e-09	1.41065959356721e-08
ENSMUSG00000018339	14778	Gpx3	2701.63800105181	0.0393925891308283	0.184547502008264	0.213455011323124	0.8309720762041	0.892423897919231
ENSMUSG00000018340	11749	Anxa6	3226.89041202638	0.0920587424136037	0.0752182166665421	1.22388892602598	0.220994131688086	0.342422838991218
ENSMUSG00000018341	16162	Il12rb2	6.51414682899057	-0.844406436244747	0.527946020427265	-1.59941812907572	0.109727726715489	0.195387083692943
ENSMUSG00000018347	52712	Zkscan6	42.9906362437198	0.535964416068506	0.221855244458573	2.41582937278089	0.0156994162555887	0.0379758950514703
ENSMUSG00000018362	16647	Kpna2	171.390739728273	0.664736055940623	0.169851784630873	3.91362420704172	9.09210983239637e-05	0.000365807700382462
ENSMUSG00000018363	66313	Smurf2	284.39265940766	-0.740527837344255	0.132698341743747	-5.58053572948397	2.39778888613309e-08	1.7633064785766e-07
ENSMUSG00000018372	320162	Cep95	60.8947739677544	0.1409409390796	0.194637899563291	0.724118680872681	0.468992876818147	0.604636355485986
ENSMUSG00000018377	22344	Vezf1	883.306734968416	-0.779012712677837	0.115621097128073	-6.73763467072906	1.60985711667318e-11	1.89322578184254e-10
ENSMUSG00000018378	70393	Cuedc1	1851.68089403743	-0.812147830124617	0.108802511885583	-7.46442169440607	8.36662519809615e-14	1.32271422837666e-12
ENSMUSG00000018378	103841	Cuedc1	1851.68089403743	-0.812147830124617	0.108802511885583	-7.46442169440607	8.36662519809615e-14	1.32271422837666e-12
ENSMUSG00000018379	110809	Srsf1	839.046639610092	0.497211940125134	0.0948996599737759	5.23934374751744	1.61148623321246e-07	1.04816805430344e-06
ENSMUSG00000018381	66610	Abi3	5.46216107928199	0.366971057230623	0.62430406626359	0.587808212473957	0.556661031058903	0.682145808441505
ENSMUSG00000018387	71774	Shroom1	8.12631742774165	-0.250420849038263	0.462273187766894	-0.541716144619964	0.588014066118932	0.708082892093871
ENSMUSG00000018395	16568	Kif3a	110.269049757147	0.630107308239355	0.173065405482514	3.6408622883504	0.00027172645613454	0.000997848456240467
ENSMUSG00000018398	20362	Septin8	314.395289970051	0.319482806679849	0.102607785730618	3.11363123572908	0.0018480030392379	0.00570534496276893
ENSMUSG00000018401	170749	Mtmr4	116.468762248684	-0.268829559614468	0.154039144460239	-1.74520288694449	0.0809495588993576	0.151921444209959
ENSMUSG00000018405	217038	Mrm1	134.763981055236	-0.506267194346711	0.137227143605535	-3.68926424499513	0.000224903529858843	0.000839825945047184
ENSMUSG00000018411	17762	Mapt	996.88121392791	-0.819399506448054	0.118052541973745	-6.94097300022808	3.89408440808636e-12	4.99319716372753e-11
ENSMUSG00000018412	76719	Kansl1	220.364626850915	-0.631455374495921	0.132182077639301	-4.77716333237732	1.77785362276327e-06	9.77795238036542e-06
ENSMUSG00000018415	66771	Gid4	855.29516210767	-1.64588745242134	0.122919885837754	-13.38992011914	6.92551920455426e-41	4.65325635354001e-38
ENSMUSG00000018417	17912	Myo1b	174.308330354075	-0.0288331532878327	0.140053328163517	-0.205872674829756	0.836890370550887	0.896487176446523
ENSMUSG00000018425	67487	Dhx40	197.423215470184	-0.053007979028035	0.105909857840968	-0.500500898675841	0.616722423517565	0.732168990607297
ENSMUSG00000018427	77864	Ypel2	193.059713093548	-0.822658562766067	0.178291716351557	-4.61411544854919	3.94772957371623e-06	2.04877407356843e-05
ENSMUSG00000018428	11640	Akap1	934.643246492493	-1.12403748703377	0.124365860035137	-9.03815152097368	1.59343396311364e-19	5.82919208611281e-18
ENSMUSG00000018433	68979	Nol11	130.246832510663	-0.374438640442118	0.140065748590863	-2.67330624516823	0.00751076495484677	0.0199046133571978
ENSMUSG00000018442	116891	Derl2	243.176561163942	0.358563283818143	0.115767484532481	3.09727109702846	0.00195311169764747	0.00599221803492847
ENSMUSG00000018446	12261	C1qbp	925.143841528821	-0.101936685145366	0.0864963562140507	-1.17850843211366	0.238593972744136	0.363564643515156
ENSMUSG00000018449	69723	Rpain	81.4080847620059	0.452234715058101	0.171707508305059	2.63375037889811	0.00844475471307794	0.0220293672513928
ENSMUSG00000018451	103712	6330403K07Rik	7.08950109510777	2.59901957414861	0.606284571585235	4.28679814060421	1.81266868650761e-05	8.34771823484894e-05
ENSMUSG00000018459	114644	Slc13a3	11.1528064440444	2.54311135351797	0.505673290177258	5.0291589508841	4.92635890461678e-07	2.96322968754695e-06
ENSMUSG00000018470	16499	Kcnab3	3.1469491068184	0.504161516459259	0.804229769162095	0.626887409284204	0.530733041060218	0.659433268116305
ENSMUSG00000018474	216848	Chd3	277.500825753173	0.723448482767587	0.206110449826028	3.51000390023033	0.000448100121163978	0.00157398826372613
ENSMUSG00000018476	216850	Kdm6b	360.245843034145	-0.766815509812422	0.150506790056736	-5.09488980213688	3.48944166142337e-07	2.15426265143372e-06
ENSMUSG00000018479	73634	Chct1	0.0701865425158341	0	4.32794324778021	0	1	NA
ENSMUSG00000018481	66884	Appbp2	177.395944004417	0.222012562334795	0.10556090003749	2.10317041874355	0.03545087511673	0.0763770083078161
ENSMUSG00000018486	22412	Wnt9b	0.48425058485956	-2.23116674231175	2.03315432852769	-1.09739172821546	0.272470187807588	NA
ENSMUSG00000018500	11541	Adora2b	14.4400809455101	1.72383207762104	0.439343059547553	3.92365838075669	8.72143834936303e-05	0.000352654027699319
ENSMUSG00000018501	20185	Ncor1	1147.27931271942	-0.644192977380668	0.0977846540127043	-6.58787397557263	4.46169095170559e-11	4.93060880008386e-10
ENSMUSG00000018507	22368	Trpv2	69.15273328638	1.93146002439083	0.22658815357047	8.52409975524223	1.54002863167298e-17	4.13346965760748e-16
ENSMUSG00000018509	73139	Cenpv	142.783398974218	-0.116860155619243	0.137713203396847	-0.848576263834978	0.396117119402309	0.53374048269293
ENSMUSG00000018537	22658	Pcgf2	50.9954766895714	0.79891413795417	0.193840570790782	4.12150116301743	3.76411570724894e-05	0.000162818198092311
ENSMUSG00000018541	67480	Cwc25	149.153283027292	0.0757268219002674	0.121767499311151	0.621896830670421	0.534009709255983	0.662402074429099
ENSMUSG00000018543	72215	1700001P01Rik	0.310776618401952	-1.03654036074308	3.41827050990281	-0.303235322582049	0.761710531944672	NA
ENSMUSG00000018547	108083	Pip4k2b	664.566431294203	-0.683912639061434	0.114761087642293	-5.95944717074459	2.53092664093351e-09	2.16720001279935e-08
ENSMUSG00000018548	68729	Trim37	82.5068333393641	-0.0699828036019671	0.164050568089826	-0.426592875701887	0.669675887700408	0.773916802452536
ENSMUSG00000018554	53422	Ybx2	128.361802872971	-1.8299543373284	0.151675801793733	-12.0649063046787	1.61846466458862e-33	4.34978563254838e-31
ENSMUSG00000018559	67181	Ctdnep1	1413.7007715722	-0.25974654264359	0.0980257742158264	-2.64977802747773	0.00805446702268204	0.0211536015343585
ENSMUSG00000018565	54351	Elp5	365.240894270188	0.00429774481894595	0.113423573789298	0.0378911074247199	0.969774503206185	0.981066231424194
ENSMUSG00000018566	20528	Slc2a4	5165.2214253412	-1.12861937699318	0.108818906924186	-10.3715375286713	3.34105196985836e-25	2.7714232327751e-23
ENSMUSG00000018567	56486	Gabarap	1726.45061677626	0.527630175501199	0.100118531737725	5.27005506716183	1.36382836420436e-07	8.95462160823038e-07
ENSMUSG00000018569	53624	Cldn7	1.48719763953205	-0.255961624726794	1.11402346035933	-0.229763226569963	0.818275761215744	0.883473266037392
ENSMUSG00000018570	70419	2810408A11Rik	5.02667643907955	1.23163463327186	0.605471025886299	2.03417600614162	0.0419338528166796	0.0880479865860219
ENSMUSG00000018572	78246	Phf23	275.685148031078	0.397464472671707	0.112379181538164	3.53681586955434	0.000404981903704058	0.00143264658353154
ENSMUSG00000018574	11370	Acadvl	1640.57970100702	-1.34488443084325	0.133476704306263	-10.0757989031359	7.06839995263203e-24	4.93002553097591e-22
ENSMUSG00000018581	13411	Dnah11	0.06689489651356	0	4.32794324778021	0	1	NA
ENSMUSG00000018583	27041	G3bp1	1320.44324240989	-0.0960093605195548	0.0626577820422234	-1.53228150423289	0.125452983267463	0.217677178593634
ENSMUSG00000018585	11927	Atox1	310.33739220792	0.928861229369011	0.182214321934055	5.09763019454186	3.43931864809675e-07	2.12592290676744e-06
ENSMUSG00000018589	237213	Glra2	0	NA	NA	NA	NA	NA
ENSMUSG00000018593	20692	Sparc	11233.4989977416	0.549436216076317	0.151063936187621	3.63711041789562	0.000275713757972706	0.00101101732207674
ENSMUSG00000018595	14657	Glra4	0.209448630285451	1.91948811031828	3.1691765490616	0.60567408618704	0.544731195158316	NA
ENSMUSG00000018599	237781	Mief2	1096.41956419605	-0.319711815754398	0.0965241912144027	-3.31224547682812	0.000925502981923676	0.00305425075419704
ENSMUSG00000018604	21386	Tbx3	73.6695216964433	-0.651376067901888	0.188218837145036	-3.46073792497163	0.000538696967301419	0.00186348288482833
ENSMUSG00000018620	30800	Mmp20	0	NA	NA	NA	NA	NA
ENSMUSG00000018623	17393	Mmp7	0.0964101638055974	0	4.32794324778021	0	1	NA
ENSMUSG00000018634	12921	Crhr1	0	NA	NA	NA	NA	NA
ENSMUSG00000018648	56405	Dusp14	89.2864891737263	0.961512408623505	0.231067071817366	4.16118316236542	3.16603023245956e-05	0.000139006036583941
ENSMUSG00000018651	217031	Tada2a	148.172216911105	0.146447086872708	0.140351719283305	1.04342923350372	0.296749540057766	0.430236674023189
ENSMUSG00000018654	22778	Ikzf1	42.7013759307833	2.17274914976468	0.317656004812998	6.83994357683797	7.92243778319918e-12	9.71957263517626e-11
ENSMUSG00000018656	403088	Tcaf3	0.13339658000953	0	4.32794324778021	0	1	NA
ENSMUSG00000018659	103711	Pnpo	123.210343355407	-0.360012054772964	0.18474813999274	-1.94866402869935	0.0513355602232821	0.104322097733713
ENSMUSG00000018661	16834	Cog1	234.302564019984	-0.199909440671771	0.148941612030939	-1.34220006045218	0.179531136897724	0.291064837645574
ENSMUSG00000018666	12412	Cbx1	540.5470407892	-0.134858182133015	0.0858220520721794	-1.57136981552939	0.11609677299996	0.204457703018861
ENSMUSG00000018669	80280	Cdk5rap3	247.701836248987	0.414667154402516	0.109548968075134	3.78522191206873	0.000153571478200437	0.000591655253456845
ENSMUSG00000018672	56358	Copz2	398.642332387033	0.710947812063491	0.136555806073833	5.2062803662782	1.92663485906354e-07	1.23955246901193e-06
ENSMUSG00000018677	68066	Slc25a39	862.28169540643	-0.0904484342454017	0.111123080076767	-0.813948229143016	0.415674609771479	0.553345205994168
ENSMUSG00000018678	78912	Sp2	126.678005234148	-0.488265512191337	0.165416938782703	-2.95172620037865	0.00316002997489357	0.00926093692991128
ENSMUSG00000018697	56321	Aatf	119.55139215295	0.393483911926667	0.165256326714992	2.3810520283758	0.0172632735197256	0.0411610840237887
ENSMUSG00000018698	16869	Lhx1	0	NA	NA	NA	NA	NA
ENSMUSG00000018707	13424	Dync1h1	1392.16271390898	-0.3671570488418	0.0935982042571866	-3.92269330117634	8.75645891984467e-05	0.000353857142035503
ENSMUSG00000018727	52670	Cpsf4l	6.0575003447052	-0.096415584335466	0.568982743760675	-0.169452563180053	0.865440681796114	0.916742226231766
ENSMUSG00000018733	103737	Pex12	93.1706619909206	-0.306929180476864	0.143348701654476	-2.14113680092254	0.0322630077337575	0.0703663110678804
[truncated: 49,345 more rows]

## Sheet: mdx_KO_vs_mdx_AAV9
Differential gene expression analysis, comparison between mdx_KO and mdx_AAV9
ensembl_gene_id	entrezgene_id	external_gene_name	baseMean	log2FoldChange	lfcSE	stat	pvalue	padj
ENSMUSG00000000001	14679	Gnai3	236.41964219386	0.823909998910473	0.122359970878933	6.73349293067156	1.65637712602155e-11	3.14788694740654e-09
ENSMUSG00000000003	54192	Pbsn	0	NA	NA	NA	NA	NA
ENSMUSG00000000028	12544	Cdc45	42.270087299657	0.216812982207272	0.257369302496405	0.84241974510655	0.399553044606383	0.578514015167323
ENSMUSG00000000031	14955	H19	10558.2404291624	0.390891634771717	0.17582016252724	2.22324691976756	0.0261991545852919	0.0823142988354499
ENSMUSG00000000037	107815	Scml2	3.03926529895379	1.16359723752166	0.759941926802527	1.53116599635122	0.125728372358174	0.262473434387789
ENSMUSG00000000049	11818	Apoh	7.14332369475111	-0.900041400384153	0.588914574270428	-1.52830552970974	0.126436697624384	0.263649066850335
ENSMUSG00000000056	67608	Narf	1324.50216095959	-0.452167856459588	0.116202091473044	-3.89121960480789	9.97416069054082e-05	0.000990988950311241
ENSMUSG00000000058	12390	Cav2	311.923133812135	0.416266165590898	0.167463628071955	2.48571089963511	0.012929295181176	0.0476581868383267
ENSMUSG00000000078	23849	Klf6	636.606408254536	0.177396492242194	0.198948919545578	0.891668538071924	0.372570621854911	0.55289518480176
ENSMUSG00000000085	29871	Scmh1	397.004199950319	-0.370990464388572	0.11626704871603	-3.19084786691953	0.00141855954602551	0.00840643118935496
ENSMUSG00000000088	12858	Cox5a	2007.31558868053	-0.690742223508419	0.115310597154372	-5.99027531341016	2.09486105982412e-09	1.46945962067663e-07
ENSMUSG00000000093	21385	Tbx2	88.7548906086807	0.0091899914238731	0.189924125118301	0.0483876991306332	0.961407262494167	0.977827028415159
ENSMUSG00000000094	21387	Tbx4	67.8721806704724	0.322830301649669	0.219696022204344	1.46944081376857	0.141713264068913	0.28525467264407
ENSMUSG00000000103	22768	Zfy2	0	NA	NA	NA	NA	NA
ENSMUSG00000000120	18053	Ngfr	25.6988885721054	0.545095513135908	0.301111107362285	1.81028032446531	0.0702523266590066	0.172299523846759
ENSMUSG00000000125	22415	Wnt3	0.537149057280222	-0.570708075374982	2.02496487389518	-0.281836037124526	0.778069236912071	NA
ENSMUSG00000000126	216795	Wnt9a	168.228176902622	-0.132129618655948	0.171487232064289	-0.770492456292104	0.44100782816817	0.616770728883645
ENSMUSG00000000127	14158	Fer	97.7863978748727	0.116603244979405	0.148417889110794	0.785641445771819	0.432077576180659	0.608729928893776
ENSMUSG00000000131	74204	Xpo6	306.342638904295	0.191174645951724	0.124750593835181	1.53245479700322	0.125410244130681	0.261943134833463
ENSMUSG00000000134	209446	Tfe3	205.376428532282	0.167814703719344	0.132737872835737	1.26425638843117	0.206138017417108	0.372113955894103
ENSMUSG00000000142	12006	Axin2	66.9020296826505	0.0986776196617895	0.211937969198217	0.465596702823457	0.641504203500034	0.778204164032106
ENSMUSG00000000148	231841	Brat1	108.188569569659	0.143309123322281	0.156882558619112	0.913480278392289	0.360990001253137	0.541087727483609
ENSMUSG00000000149	14673	Gna12	516.917095763372	0.138231416693241	0.0916963485841863	1.50749096150029	0.131684858893217	0.271372756745775
ENSMUSG00000000154	18400	Slc22a18	8.41327695725476	0.364075011720567	0.556799243966594	0.653871239348181	0.51319476473954	0.67971033802534
ENSMUSG00000000157	16415	Itgb2l	0.0517834982841109	0.174313350024088	4.32804458550702	0.0402753129225604	0.967873635239457	NA
ENSMUSG00000000159	72058	Igsf5	0.13300336699194	-1.97617125293654	4.32073085834723	-0.457369671410744	0.647405359761442	NA
ENSMUSG00000000167	72614	Pih1d2	3.27958440975854	0.979978808731546	0.826222500951733	1.1860955222143	0.235584578679986	0.407362923608304
ENSMUSG00000000168	235339	Dlat	3127.20560151053	-0.166228213415991	0.103632785331021	-1.60401182777274	0.108711445493978	0.237030398232868
ENSMUSG00000000171	66925	Sdhd	2954.74758334456	-0.241925186746269	0.112356728652609	-2.15318823934673	0.0313038875833778	0.0946587860615592
ENSMUSG00000000182	64654	Fgf23	0.840587080036829	0.208568521080866	1.84477540374953	0.113059031824116	0.909983754545264	NA
ENSMUSG00000000183	14177	Fgf6	70.26955277911	-0.737546497102444	0.208075319169848	-3.54461307590449	0.000393189811304906	0.0030255622768208
ENSMUSG00000000184	12444	Ccnd2	229.673105648709	0.00364971560219587	0.171394768309136	0.0212942065746899	0.98301096527635	0.990648120389485
ENSMUSG00000000194	277463	Gpr107	437.888822485365	-0.026081676711373	0.0972576848732748	-0.268170857093268	0.788567806320352	0.879205599316345
ENSMUSG00000000197	338370	Nalcn	6.48840216884302	1.27154087592198	0.624165249916876	2.03718626772528	0.041631379444532	0.117435841498348
ENSMUSG00000000202	72014	Btbd17	6.6373851156632	0.640666837132138	0.797545525537475	0.803298139877828	0.421802432832122	0.599212426093716
ENSMUSG00000000204	20558	Slfn4	28.0643326435537	3.24944213499455	0.726550273595213	4.47242572618578	7.73372658618709e-06	0.000125896441558408
ENSMUSG00000000214	21823	Th	2.32925843282266	-0.272509708671202	1.26434441208107	-0.21553439558661	0.829350698359202	NA
ENSMUSG00000000215	16334	Ins2	0.35189502859296	0.174314013252521	3.33504772604037	0.0522673219610806	0.958315691008937	NA
ENSMUSG00000000216	20278	Scnn1g	0.115898256123434	1.04950800549084	4.31516654642891	0.243213788899847	0.807839785527444	NA
ENSMUSG00000000223	13497	Drp2	117.105988220365	0.471070515591114	0.236792631523192	1.98937995900002	0.0466592800072982	0.127015201938588
ENSMUSG00000000244	27027	Tspan32	18.256665654204	0.772928386314218	0.306942681361301	2.51815219338756	0.0117972332973888	0.0444886896660181
ENSMUSG00000000247	16870	Lhx2	3.04727334136791	0.810918054548361	0.697302442075995	1.16293591649287	0.244855503771985	0.417713482426156
ENSMUSG00000000248	70809	Clec2g	1.09058182640498	2.99226165271397	1.506811178168	1.9858239015402	0.0470528808241262	NA
ENSMUSG00000000253	66355	Gmpr	1927.83592374866	-0.607207002915365	0.129462656191343	-4.69020967728274	2.7292522458045e-06	5.27268306210742e-05
ENSMUSG00000000263	14654	Glra1	0.0964101638055974	-1.26836817847825	4.32804458550702	-0.293058020410773	0.769477803563898	NA
ENSMUSG00000000266	23947	Mid2	68.4521159056381	0.209901212752423	0.18922949647792	1.10924151181111	0.267326009023517	0.443031463342158
ENSMUSG00000000275	217069	Trim25	291.469422321801	0.622650754149911	0.14904735565776	4.1775364037966	2.94683511230477e-05	0.000373646804309613
ENSMUSG00000000276	56077	Dgke	101.488073202907	-0.133118197002971	0.152485419412925	-0.872989676753891	0.382668704554118	0.562355534193795
ENSMUSG00000000278	74617	Scpep1	251.424456137254	0.997694098167316	0.155319002296425	6.42351601166755	1.33162130553409e-10	1.51139018178119e-08
ENSMUSG00000000282	17428	Mnt	131.111989322016	0.144813379468987	0.158725473816299	0.912351218661897	0.361583860020005	0.541793847518884
ENSMUSG00000000290	16414	Itgb2	292.439034843588	1.29351612605346	0.361773972037018	3.57548144984047	0.000349583964223283	0.00275221594954977
ENSMUSG00000000295	69692	Hddc2	109.219712765095	-0.149910277514863	0.193788654244405	-0.773576131685174	0.439181491377837	0.615290784765933
ENSMUSG00000000296	21987	Tpd52l1	211.182764879891	-0.0416389260213167	0.147977504973985	-0.281386863690105	0.778413692517846	0.872651991941263
ENSMUSG00000000301	18618	Pemt	19.0940527654651	0.117833531458593	0.309199370067115	0.381092404661162	0.703134683141951	0.822487773024113
ENSMUSG00000000303	12550	Cdh1	6.52503257766208	-0.34450518199103	0.569649766661137	-0.604766651639766	0.545334054688182	0.705528361420379
ENSMUSG00000000305	12561	Cdh4	65.1698937713492	-1.69726914236916	0.320847679162787	-5.2899529982513	1.22347796717993e-07	4.15728147517438e-06
ENSMUSG00000000308	12716	Ckmt1	0.317380383664028	0.133002080083133	2.60137314807356	0.0511276439451323	0.959223808111488	NA
ENSMUSG00000000317	12029	Bcl6b	238.996971572364	-0.113071960174317	0.266992322797925	-0.423502664756007	0.671928554759244	0.799772228839147
ENSMUSG00000000318	17312	Clec10a	107.914159289266	0.694120651432689	0.249359243087773	2.78361709330487	0.0053756454856777	0.024150508471115
ENSMUSG00000000320	11684	Alox12	35.7370958283064	-0.80788884783827	0.336800725437741	-2.39871469038035	0.016452728526058	0.0573232562417165
ENSMUSG00000000326	12846	Comt	509.648550135305	-0.101499120562949	0.0913761114119599	-1.11078397837866	0.266661344388917	0.442249657798053
ENSMUSG00000000339	66368	Rtca	172.129602193933	-0.0861846490265449	0.130863060671191	-0.65858652995358	0.510161315018233	0.677286697478516
ENSMUSG00000000340	13171	Dbt	352.348857015016	-0.228874547578512	0.118251347824725	-1.93549208350466	0.0529299391929322	0.139755561578237
ENSMUSG00000000346	23994	Dazap2	921.668637372633	0.393295495850205	0.105611071703195	3.72399872009165	0.000196091919588559	0.00173145669030546
ENSMUSG00000000355	68995	Mcts1	297.321688233011	-0.115068750789234	0.128284669698286	-0.896979748709376	0.369729723351458	0.550403662264848
ENSMUSG00000000359	19700	Rem1	51.1005258747769	0.420070566939344	0.187399295425247	2.24158028975572	0.0249885110321934	0.0794267258479521
ENSMUSG00000000365	30054	Rnf17	1.052781166966	0.355730001064174	1.41057066927321	0.252188712563732	0.800895202249859	NA
ENSMUSG00000000374	216131	Trappc10	504.792495592826	0.0838200845500637	0.152390771511049	0.550033861755116	0.582296148431296	0.734340142743912
ENSMUSG00000000378	216527	Ccm2	255.319974744697	-0.125107155540689	0.115200614788745	-1.08599381843673	0.277481727118984	0.453879238193822
ENSMUSG00000000381	22373	Wap	0	NA	NA	NA	NA	NA
ENSMUSG00000000384	21379	Tbrg4	603.893026775357	-0.573723002034427	0.108406217732404	-5.29234405586067	1.20758430946221e-07	4.11182457371883e-06
ENSMUSG00000000385	50528	Tmprss2	0.643545226935119	-0.547031559977831	1.89074127848592	-0.289321212903273	0.772335580586322	NA
ENSMUSG00000000386	NA	Mx1	25.1224925993721	1.38759575146599	0.486866836871574	2.85005189587807	0.00437120962605227	0.0205591511160283
ENSMUSG00000000392	14089	Fap	216.583100693772	0.388107127300128	0.187053091359314	2.07485011062772	0.0380004286612907	0.109653779314996
ENSMUSG00000000394	14526	Gcg	0	NA	NA	NA	NA	NA
ENSMUSG00000000399	66108	Ndufa9	2438.66466751877	-0.436672650699792	0.111185146990682	-3.92743691507994	8.58559305377314e-05	0.000869439928277931
ENSMUSG00000000402	54156	Egfl6	9.97184860491932	-0.220005065058826	0.65211295995822	-0.337372631074411	0.735836013738774	0.84580517677379
ENSMUSG00000000409	16818	Lck	7.18279108535449	1.25887754031984	0.687154620981471	1.83201495250336	0.0669491929282229	0.166370322216645
ENSMUSG00000000411	58864	Tssk3	0.156170029475683	0.994475378326913	4.10006208635467	0.242551297366107	0.808353013657243	NA
ENSMUSG00000000416	30785	Cttnbp2	9.46265100667684	-0.418752065404852	0.503583413479351	-0.831544594591822	0.405666046816777	0.584159107416159
ENSMUSG00000000420	14423	Galnt1	747.435615213136	0.185815372757668	0.101116831458146	1.83763049215579	0.0661168724829039	0.164702661768112
ENSMUSG00000000435	17877	Myf5	27.6339832803332	1.07259698682106	0.278157567396511	3.85607695976173	0.000115221226680395	0.00111562543179169
ENSMUSG00000000439	67027	Mkrn2	326.224218514065	-0.139629937017737	0.160104735758575	-0.872116220398926	0.383144978153806	0.562786152866523
ENSMUSG00000000440	19016	Pparg	53.1384238654519	0.706086010401731	0.274924051214937	2.56829479735009	0.0102200201006786	0.0399321081820442
ENSMUSG00000000441	110157	Raf1	394.924047321752	0.0312420997462917	0.176996628621961	0.176512400205205	0.85989140767468	0.921880299575925
ENSMUSG00000000486	54204	Septin1	30.795606295278	0.452118220432897	0.256879995824764	1.76003670111128	0.0784015840025983	0.187256391778236
ENSMUSG00000000486	100043580	Septin1	30.795606295278	0.452118220432897	0.256879995824764	1.76003670111128	0.0784015840025983	0.187256391778236
ENSMUSG00000000489	18591	Pdgfb	585.302490615716	-0.106241842270078	0.109126453230918	-0.973566345506196	0.33027190329142	0.510296449219996
ENSMUSG00000000530	11482	Acvrl1	283.33511979383	-0.0127938876894488	0.107532990469791	-0.118976396299915	0.905294055959761	0.94798347325771
ENSMUSG00000000531	56149	Tamalin	120.922059264388	-0.303343065023769	0.13880860745641	-2.18533324829317	0.0288644212800997	0.0887601319665003
ENSMUSG00000000532	11479	Acvr1b	454.44609710105	-0.115843970578695	0.133683018039582	-0.866557116060877	0.386184718856104	0.565588908523867
ENSMUSG00000000538	216810	Tom1l2	1155.704091135	-0.408283465817132	0.103888065272866	-3.93003243197147	8.49344046461371e-05	0.000863825705996555
ENSMUSG00000000544	59290	Gpa33	0.0920311874483592	0.847156197154135	4.3231225743646	0.195959328606048	0.844641999828849	NA
ENSMUSG00000000552	29813	Zfp385a	192.763849825333	-0.200690617276033	0.156537885364889	-1.28205780222611	0.199822370247767	0.364671855837142
ENSMUSG00000000555	16402	Itga5	400.296694483188	0.367577212798793	0.123683374552945	2.97192095645356	0.00295942864386556	0.015031510165545
ENSMUSG00000000560	14395	Gabra2	0.149859998412631	0	4.32804458550702	0	1	NA
ENSMUSG00000000561	70465	Wdr77	170.080642195054	-0.0806320767950071	0.143832754326084	-0.560596069878533	0.575072931328033	0.728576030643873
ENSMUSG00000000562	11542	Adora3	2.97298308230245	0.945237284918792	0.913245721288701	1.0350306197821	0.30065461166851	NA
ENSMUSG00000000562	69296	Adora3	2.97298308230245	0.945237284918792	0.913245721288701	1.0350306197821	0.30065461166851	NA
ENSMUSG00000000563	11950	Atp5pb	6778.65569530231	-0.339208281664877	0.09993467139499	-3.39430026566218	0.00068804208710938	0.00474919553150902
ENSMUSG00000000567	20682	Sox9	72.6157576746219	0.274779442219575	0.255171323563553	1.07684295547865	0.281550431284882	0.458367344333754
ENSMUSG00000000568	11991	Hnrnpd	563.620351613047	0.230390572549287	0.0961224091281924	2.39684559135456	0.0165368907628152	0.0574901911853588
ENSMUSG00000000579	100040563	Dynlt1c	30.0995999545305	0.0369190180403274	0.296617882589069	0.124466595601299	0.900945847524817	0.945186400407318
ENSMUSG00000000581	57316	C1d	444.790232791015	0.128043406938014	0.148660221905823	0.861315860399627	0.389064102701974	0.568009262578032
ENSMUSG00000000594	14667	Gm2a	483.215388914271	0.605511866798616	0.177450257177345	3.41229072547054	0.000644193691815662	0.00449944517052785
ENSMUSG00000000600	79264	Krit1	217.056420997392	-0.00711084498267096	0.120672203832968	-0.0589269505056331	0.953010291945537	0.973256699047605
ENSMUSG00000000605	12727	Clcn4	655.179578317581	-0.473695123835441	0.0892255183117135	-5.30896466390439	1.10249703210996e-07	3.85850353164994e-06
ENSMUSG00000000606	669149	Vmn2r88	0	NA	NA	NA	NA	NA
ENSMUSG00000000617	108072	Grm6	0	NA	NA	NA	NA	NA
ENSMUSG00000000627	20355	Sema4f	4.3852006600693	-0.200672752975533	0.656060723704753	-0.305875273011834	0.759699613491506	0.86028756896731
ENSMUSG00000000628	15277	Hk2	3479.12224281191	-0.977161063324869	0.144562556240807	-6.7594340383491	1.38531810659557e-11	2.72790832942145e-09
ENSMUSG00000000631	360013	Myo18a	2640.7204466459	-0.457649552511707	0.102659980011568	-4.45791585445603	8.27603748982141e-06	0.000133477425674767
ENSMUSG00000000632	20370	Sez6	5.84279401887693	-0.200962763539356	0.599691031684088	-0.335110503445416	0.737541729905439	0.846812928245486
ENSMUSG00000000673	107766	Haao	4.03891211271484	-0.603541468685309	0.668493640475879	-0.902838010928073	0.366611874200699	0.547056009489292
ENSMUSG00000000682	23833	Cd52	149.47225838176	1.12712350767605	0.394680975477406	2.85578372839654	0.00429307455817325	0.0202674785034037
ENSMUSG00000000686	67477	Abhd15	4.60036689831086	0.279871808496291	0.672228878932394	0.41633410474833	0.67716553979299	0.80381439534073
ENSMUSG00000000690	15414	Hoxb6	17.7218547919947	-0.102502805441421	0.334767208394533	-0.306191296133814	0.759458999046377	0.860253508934367
ENSMUSG00000000693	16950	Loxl3	119.188299921432	0.769457901858528	0.234277842065962	3.28438189063515	0.00102206327093095	0.00650744141024363
ENSMUSG00000000701	27382	Tcl1b5	0	NA	NA	NA	NA	NA
ENSMUSG00000000706	12231	Btn1a1	0.0614871707126146	-1.26836817847825	4.32804458550702	-0.293058020410773	0.769477803563898	NA
ENSMUSG00000000708	18519	Kat2b	673.480856262213	0.00547456045612816	0.164354615311513	0.0333094415739517	0.973427824651802	0.985060018952947
ENSMUSG00000000711	19344	Rab5b	996.491317672973	0.0500396436457884	0.127515825021373	0.392419087100768	0.694748585282875	0.816493196078471
ENSMUSG00000000724	12957	Cryba1	0.0650779221030176	0	4.32804458550702	0	1	NA
ENSMUSG00000000730	54427	Dnmt3l	1.01556573387574	-0.587304380049562	1.23779555321006	-0.474476078481997	0.635160452527428	NA
ENSMUSG00000000731	11634	Aire	0.142847566935452	-1.26836817847825	4.32804458550702	-0.293058020410773	0.769477803563898	NA
ENSMUSG00000000732	50723	Icosl	36.4396916612089	0.645736371953591	0.232262336311137	2.7802026889481	0.00543249791416882	0.0243724254485795
ENSMUSG00000000738	234847	Spg7	1082.57911529422	-0.393893743204898	0.105445685914454	-3.73551312022815	0.000187332811578939	0.00167127045439202
ENSMUSG00000000739	57429	Sult5a1	50.5617950716926	-0.242871223221742	0.238201085611772	-1.01960586198831	0.307915423751772	0.487850601098586
ENSMUSG00000000740	270106	Rpl13	4420.39937475645	0.0283939694362009	0.10931482671143	0.259744906435752	0.795060550810467	0.882492011574994
ENSMUSG00000000743	234852	Chmp1a	634.405775418061	0.0198731469217589	0.0747418683028221	0.265890422236188	0.790323601619947	0.879919305242642
ENSMUSG00000000751	68275	Rpa1	706.249245249627	-0.140595022903999	0.10006559717895	-1.40502856993468	0.160012782819683	0.311376226027491
ENSMUSG00000000753	20317	Serpinf1	1521.53140363401	0.287601491872029	0.163529945381343	1.75870842004721	0.078627046503097	0.187575601816759
ENSMUSG00000000759	259279	Tubgcp3	140.186709998395	0.158078004778422	0.134746945232676	1.17314722426886	0.240736771616168	0.412951489850405
ENSMUSG00000000766	18390	Oprm1	0	NA	NA	NA	NA	NA
ENSMUSG00000000776	67065	Polr3d	262.309028253746	-0.282814372308786	0.117851025449142	-2.39976165867841	0.0164057499867433	0.0572816872000282
ENSMUSG00000000782	21414	Tcf7	20.0402008903992	0.952165024824278	0.36714833605422	2.59340689122356	0.00950302667190862	0.0376984145450666
ENSMUSG00000000787	13205	Ddx3x	1491.81786058818	0.305199256636836	0.108383050747849	2.81593159198735	0.00486360214977496	0.0223791423243024
ENSMUSG00000000791	16161	Il12rb1	1.11764041764236	1.56342433438463	1.31934749338379	1.18499814660265	0.23601817970758	NA
ENSMUSG00000000792	114479	Slc5a5	5.21077505564937	-0.164169179316132	0.666204265549664	-0.246424689551757	0.80535349590352	0.888351051970516
ENSMUSG00000000794	140493	Kcnn3	65.8034970986022	0.823768716569486	0.225068402360071	3.66008159266886	0.000252134949528925	0.00212198435381089
ENSMUSG00000000804	237898	Usp32	142.721878389347	0.268885940321349	0.129810400554797	2.07137439813879	0.0383238215207976	0.110450456521939
ENSMUSG00000000805	12351	Car4	81.4634433136929	-0.490209354886125	0.238487088168161	-2.05549641555635	0.0398310815244141	0.11365209434969
ENSMUSG00000000811	232223	Txnrd3	81.4516454648014	-0.0226770349895402	0.168084251432682	-0.134914691865837	0.892679323328345	0.940941089501176
ENSMUSG00000000817	14103	Fasl	1.20309257813221	1.31796148706361	1.41162798073637	0.933646474176644	0.350486283908006	NA
ENSMUSG00000000823	269401	Zfp512b	173.009060237797	0.0603376328645884	0.191092428139036	0.31575103970466	0.75219148288191	0.855638752521015
ENSMUSG00000000826	13002	Dnajc5	618.314967066466	-0.0152579354794999	0.115678499195148	-0.131899493731846	0.89506378907389	0.942147723398872
ENSMUSG00000000827	66314	Tpd52l2	469.454210640937	0.13558806885846	0.128796776931042	1.05272874127164	0.292465332114817	0.470662996069768
ENSMUSG00000000838	14265	Fmr1	115.517691120465	0.758423931998531	0.15156414478116	5.00397988649363	5.61586192000319e-07	1.45923127536617e-05
ENSMUSG00000000861	14025	Bcl11a	2.54388947941653	1.5482063337762	0.962716869363442	1.60816371151769	0.10779932851832	NA
ENSMUSG00000000869	16189	Il4	8.4822797069362	0.222290454915599	0.523247567665732	0.42482845339781	0.670961733982073	0.799052650845454
ENSMUSG00000000876	59038	Pxmp4	201.298777104205	-0.129583997717061	0.1175367785514	-1.10249744219757	0.270245469884883	0.446240852677159
ENSMUSG00000000881	53310	Dlg3	44.1193625978487	0.619862009335703	0.291047117804567	2.1297651528435	0.033191006977891	0.0991281998581776
ENSMUSG00000000884	13972	Gnb1l	23.0095151236896	0.0527987451968474	0.274945262506597	0.192033660502081	0.847715838812814	0.914827842162868
ENSMUSG00000000889	13166	Dbh	4.85714769864433	1.25938273231509	0.798143132372631	1.57789083340395	0.114590691237866	0.245751247551724
ENSMUSG00000000901	17385	Mmp11	65.3630501832296	0.533357272174888	0.235612227478131	2.26370794879222	0.0235920832812204	0.0760080838060844
ENSMUSG00000000902	20587	Smarcb1	274.707967117372	-0.00325507435900871	0.116746226986451	-0.0278816236124401	0.977756564978732	0.98755847597187
ENSMUSG00000000903	22364	Vpreb3	0.709302151619787	0.693285887839691	1.71619255082593	0.403967426327566	0.686236672607879	NA
ENSMUSG00000000915	29816	Hip1r	119.804635612714	-0.217645157920124	0.141152155904951	-1.54191876507137	0.123093335323602	0.258657427684361
ENSMUSG00000000916	100609	Nsun5	96.7061665218498	-0.00488467543667006	0.199773382584686	-0.0244510823888132	0.980492802633724	0.989147235741348
ENSMUSG00000000934	72960	Top1mt	101.9007911191	-0.221965542033262	0.174398982399958	-1.27274562602789	0.203108321461506	0.368638973459894
ENSMUSG00000000938	15395	Hoxa10	203.22191258502	0.385503797733461	0.195041849372746	1.97651836758747	0.0480960975450884	0.130081518827888
ENSMUSG00000000942	15401	Hoxa4	18.8543646002897	0.0230000997672833	0.33563904190616	0.0685262943090925	0.945366689436732	0.969570354678336
ENSMUSG00000000948	NA	Gm38393	3.41262321983626	0.328057346207978	1.03606757336883	0.316637017353301	0.751519044145468	0.855279833874524
ENSMUSG00000000957	17387	Mmp14	759.792271102787	0.614126650199438	0.192808843525083	3.18515810256154	0.00144674944172598	0.00853634399840053
ENSMUSG00000000958	20540	Slc7a7	35.962359050529	0.67236958786749	0.270680063270238	2.48400114786517	0.0129915389246227	0.0478336815012467
ENSMUSG00000000959	69089	Oxa1l	657.276959269197	-0.363054351704416	0.0774899605700272	-4.68517920300561	2.7971508860159e-06	5.39111250955707e-05
ENSMUSG00000000976	217026	Heatr6	150.489433684937	-0.269688871696185	0.12420927648783	-2.17124581449928	0.0299125958560796	0.0913645050778855
ENSMUSG00000000982	20302	Ccl3	9.14156404054023	1.20954905653646	1.23785242076704	0.977135106127563	0.328502269773769	0.508720968086268
ENSMUSG00000000983	14038	Wfdc18	0.796423573820238	1.82614086857239	1.54263977532145	1.18377660020588	0.236501507373342	NA
ENSMUSG00000001014	78369	Icam4	0	NA	NA	NA	NA	NA
ENSMUSG00000001016	67781	Ilf2	318.560837554654	0.0536450791265479	0.108829063268254	0.492929714871454	0.62206225041619	0.764032871481341
ENSMUSG00000001017	66511	Chtop	1378.48241309368	0.000766798381621831	0.0775165124816315	0.0098920650203856	0.992107402764974	0.995908384077009
ENSMUSG00000001018	20615	Snapin	751.187991844814	0.0525681717242602	0.100995625229931	0.520499492968939	0.602715481196981	0.750135685705411
ENSMUSG00000001020	20198	S100a4	3.37120936654937	0.397847400022361	0.697877226819218	0.570082221819543	0.568621932563321	0.723797263692751
ENSMUSG00000001021	20197	S100a3	1.32186640573467	0.253289703877115	1.10066705127681	0.230123817718802	0.817995557639962	NA
ENSMUSG00000001023	20199	S100a5	0.345425666280772	0	2.8806814093504	0	1	NA
ENSMUSG00000001025	20200	S100a6	1123.07886120158	0.531234610125009	0.164098711017712	3.23728691609082	0.00120672020385383	0.00741173807282486
ENSMUSG00000001027	110880	Scn4a	2984.16532516001	-0.500805236484706	0.175083487949772	-2.8603795957525	0.0042313419466811	0.0200571498771914
ENSMUSG00000001029	15896	Icam2	101.359907381381	-0.324606575138584	0.167954344357021	-1.93270722696263	0.053272274413778	0.140387302969814
ENSMUSG00000001034	23939	Mapk7	103.902741973705	0.343444381740873	0.16139344270312	2.12799464456949	0.0333375276085188	0.0994648687903672
ENSMUSG00000001036	13855	Epn2	321.049626905492	-0.257085417666558	0.124415226804423	-2.06635011059128	0.0387954330073894	0.111534310830743
ENSMUSG00000001039	27078	B9d1	26.228671821416	0.187006612274371	0.274872322095456	0.680339915087664	0.496289256371718	0.66557410405673
ENSMUSG00000001052	99683	Sec24b	255.235942269785	-0.0473088792319619	0.119512510045484	-0.395848762727491	0.692216601383938	0.814806491394964
ENSMUSG00000001053	212706	N4bp3	97.3592534459706	0.152727516399362	0.145269433562532	1.05133965662239	0.293102619661601	0.471410078306358
ENSMUSG00000001054	66089	Rmnd5b	187.586327526441	-0.243091288879349	0.107518601444536	-2.26092309250088	0.0237640198754548	0.0763723632491519
ENSMUSG00000001056	52530	Nhp2	361.034798199589	-0.16389193536691	0.148450704904209	-1.10401587835278	0.269586249911242	0.445422327997304
ENSMUSG00000001062	72325	Vps9d1	238.684131858974	-0.137246582680318	0.114002428313234	-1.20389174784258	0.228631421737434	0.399268293287383
ENSMUSG00000001065	57247	Zfp276	59.3169309157127	0.507825837679784	0.198341335201457	2.56036310920253	0.0104562848383238	0.0406608421121971
ENSMUSG00000001076	239659	C1ql4	0	NA	NA	NA	NA	NA
ENSMUSG00000001082	68294	Mfsd10	82.762613878336	0.430054573011096	0.195221325434774	2.20290776150263	0.0276012504696022	0.0857332435318218
ENSMUSG00000001089	269593	Luzp1	230.206600490547	-0.212993130068419	0.119526625235819	-1.78197225637548	0.0747537560995972	0.180522368453283
ENSMUSG00000001095	20500	Slc13a2	0.170888214687542	-0.547028217477204	3.97432587660598	-0.137640504191458	0.890524542452821	NA
ENSMUSG00000001098	330171	Kctd10	111.204796887749	0.884416433991544	0.214111157539084	4.13064150489263	3.61752339372242e-05	0.000441559390194169
ENSMUSG00000001100	67811	Poldip2	1086.69894664339	-0.426031876008966	0.0746501187543679	-5.70704887169436	1.14951784510428e-08	6.2034207550009e-07
ENSMUSG00000001103	18292	Sebox	0.811802723393335	-1.4897638415752	1.62785321460128	-0.915170869346529	0.360101934933777	NA
ENSMUSG00000001105	55978	Ift20	225.182603376682	0.140680589800741	0.101457270271783	1.38659939720324	0.165563952240282	0.318800334049855
ENSMUSG00000001119	12833	Col6a1	2933.68030875654	0.514141563857408	0.148664799894298	3.45839475264466	0.000543404540429649	0.00391596287865176
ENSMUSG00000001120	59093	Pcbp3	32.2104697682931	-0.00771558836483858	0.243601169120681	-0.031673035037924	0.974732799016705	0.985703512035873
ENSMUSG00000001123	16859	Lgals9	266.434641676908	0.33357152137422	0.164813183965583	2.02393712291778	0.0429766216815747	0.119795580629751
ENSMUSG00000001127	11836	Araf	831.915627974372	0.0222962960752889	0.0940573386229597	0.237050042045802	0.812617968463785	0.893397080934005
ENSMUSG00000001128	18636	Cfp	239.484763852563	0.452334823193943	0.214660773593063	2.10720764498615	0.0350995845488877	0.103363533309373
ENSMUSG00000001131	21857	Timp1	250.701500620966	0.977421495893885	0.371254390455602	2.6327540387991	0.00846956575912843	0.0343746170268674
ENSMUSG00000001134	22294	Uxt	65.4400226368646	-0.619319952689196	0.197708920582314	-3.1324836070376	0.00173334106727762	0.00979589433042373
ENSMUSG00000001138	94218	Cnnm3	130.925274244038	-0.0408662843464814	0.215089482744596	-0.189996664760254	0.849311744064933	0.915703617982536
ENSMUSG00000001143	214895	Lman2l	312.897831364869	0.0213703905296643	0.112986846398385	0.189140516890909	0.849982686670994	0.915955309826133
ENSMUSG00000001150	54387	Mcm3ap	254.933718756775	-0.195211914109651	0.158158216006096	-1.234282473837	0.217097664366125	0.384883851437244
ENSMUSG00000001151	18541	Pcnt	591.384865162045	-0.319096616176339	0.126778722786212	-2.51695717675303	0.0118373215585848	0.044588426723556
ENSMUSG00000001155	14317	Ftcd	1.41335790504242	-2.22793013872868	1.18233791100187	-1.88434297673904	0.0595185977019719	NA
ENSMUSG00000001156	17119	Mxd1	60.568399917337	0.363334273997538	0.191849287992046	1.89385260586738	0.0582445767900543	0.149948142774784
ENSMUSG00000001157	23885	Gmcl1	58.9933897130381	0.458935683061126	0.210732848907301	2.17780799453343	0.0294203344654788	0.0901214485205282
ENSMUSG00000001158	66618	Snrnp27	753.534813489634	-0.448644067438775	0.143582481612872	-3.1246434968885	0.00178020668775454	0.0100088400772825
ENSMUSG00000001166	114643	Oas1c	6.32043810153154	0.184081644601207	0.540668525626655	0.340470428508575	0.733502288640361	0.84407247803549
ENSMUSG00000001168	246729	Oas1h	0.161516124629939	1.58950659446959	4.28245137897035	0.371167458497044	0.710512809041667	NA
ENSMUSG00000001173	320634	Ocrl	177.132938036123	0.157128327289319	0.133347120967269	1.17834060570297	0.23866084583453	0.410899911968772
ENSMUSG00000001175	12313	Calm1	6236.16746837695	0.00433300866058873	0.103130458631959	0.0420148297415402	0.966486876131932	0.981003238399896
ENSMUSG00000001211	28169	Agpat3	1387.03885672428	-0.163510210149352	0.106016032878124	-1.54231587157504	0.122996853921969	0.258493794143901
ENSMUSG00000001225	13487	Slc26a3	0.0579491280617172	0.174313350024088	4.32804458550702	0.0402753129225604	0.967873635239457	NA
ENSMUSG00000001227	20359	Sema6b	90.3883221837436	0.28403235086969	0.166563730564745	1.70524729427386	0.0881483128310504	0.204702475832721
ENSMUSG00000001228	18140	Uhrf1	37.7861259482381	1.2442386778208	0.455214221694267	2.73330361514157	0.00627025030313736	0.0271643466751272
ENSMUSG00000001229	224897	Dpp9	533.568995218881	-0.346194235736868	0.124887618207545	-2.77204610597619	0.0055705145891275	0.0248619580679137
ENSMUSG00000001240	54409	Ramp2	284.599303945412	-0.317718986279983	0.14981349402932	-2.12076347553714	0.0339417117973147	0.100844089731924
ENSMUSG00000001247	54135	Lsr	5.46336730951466	0.022889602608262	0.5618998559761	0.0407360891176943	0.967506290507684	0.981628421925187
ENSMUSG00000001248	52857	Gramd1a	479.496243062266	-0.0956017891021992	0.110166569916191	-0.867793098894953	0.385507608648612	0.56504166777084
ENSMUSG00000001249	15451	Hpn	86.4128104937866	-0.414520542795058	0.186525839313792	-2.2223223566238	0.0262615283258712	0.0824152110134483
ENSMUSG00000001260	14405	Gabrg1	0.456540242059635	-1.25779666613201	2.20611620870406	-0.570140712066516	0.568582264154362	NA
ENSMUSG00000001270	12709	Ckb	620.296367404042	0.796070887769316	0.301535843169137	2.64005392991633	0.0082892835255997	0.0337989002660359
ENSMUSG00000001280	20683	Sp1	215.465315123558	0.191791676680283	0.111033468689805	1.72733211835517	0.0841080340784791	0.197622442348859
ENSMUSG00000001281	16421	Itgb7	57.9211361200906	0.546685487182138	0.215978742041427	2.53120044137158	0.011367286847477	0.0432163145464445
ENSMUSG00000001285	60315	Myg1	123.224756970765	-0.250013244720845	0.14829662486765	-1.68589976301871	0.091815107606983	0.210850937013985
ENSMUSG00000001288	19411	Rarg	278.398079167298	-0.392206205881065	0.168400185052293	-2.32901291503495	0.019858381522417	0.0668191791774016
ENSMUSG00000001289	56612	Pfdn5	889.10800680694	-0.245264141850787	0.12177285128202	-2.01411184240703	0.043997792468217	0.121840040681216
ENSMUSG00000001300	13642	Efnb2	122.327044911017	0.346085813076865	0.192038664511282	1.8021673601908	0.0715190783214143	0.174724636186128
ENSMUSG00000001305	67223	Rrp15	107.259365760184	-0.108788387292744	0.144488390967191	-0.752921300905389	0.451497207168738	0.626543313529343
ENSMUSG00000001313	11858	Rnd2	43.7628153933365	0.127759196915119	0.210064082520864	0.608191535563579	0.543060447879163	0.703533604956962
ENSMUSG00000001323	27364	Srr	71.4722495392578	-0.323005916541249	0.192402645569477	-1.67880184591647	0.0931906687473685	0.213081741746921
ENSMUSG00000001333	68828	Sync	219.692489040667	0.596993968002817	0.27805058018685	2.14706967200585	0.0317877353324921	0.0957675108339632
ENSMUSG00000001334	384061	Fndc5	1716.5289327052	-0.849921320944675	0.122524189388614	-6.93676346838703	4.01184690138862e-12	9.70530360757089e-10
ENSMUSG00000001348	11433	Acp5	100.023231683747	1.02023122988355	0.577990852283173	1.76513386994525	0.0775412695047627	0.185717249235909
ENSMUSG00000001349	12797	Cnn1	44.5511126961937	-0.590887561208817	0.312287370294448	-1.89212762799752	0.0584739780453038	0.150408986020215
ENSMUSG00000001366	71538	Fbxo9	423.831052882759	-0.0886347037743083	0.129173636884817	-0.686167130630095	0.492607722484463	0.662866838159564
ENSMUSG00000001376	73288	Vps50	262.700578310993	0.114742138508566	0.121048052266142	0.947905698278302	0.343177463790992	0.522729959757687
ENSMUSG00000001380	15115	Hars	347.249336628755	0.0528758982045787	0.0939840188195579	0.5626052053179	0.573703746709086	0.727559779576542
ENSMUSG00000001383	66492	Zmat2	757.658173070854	-0.132896560753694	0.118401014335054	-1.12242755266961	0.26168069496696	0.436597517204982
ENSMUSG00000001403	68612	Ube2c	78.9549714877527	0.738208871816292	0.231374995423569	3.19053003313898	0.00142012079986474	0.00840958491050335
ENSMUSG00000001415	229512	Smg5	696.974841724541	-0.421610597792279	0.10688195147323	-3.94463791108714	7.99206481220088e-05	0.000828296178126894
ENSMUSG00000001416	12462	Cct3	1064.11351242304	0.131157245970881	0.0966940310463997	1.35641512254198	0.174967124349898	0.331939951291321
ENSMUSG00000001418	56700	Glmp	370.639014195728	0.0924610465977933	0.127854111300874	0.723176170535561	0.469571656979325	0.643012257625385
ENSMUSG00000001419	17261	Mef2d	1828.97507317943	-0.149331128350325	0.126861531260491	-1.1771190751568	0.239147982533818	0.41143522384555
ENSMUSG00000001420	71913	Tmem79	19.2248029822106	-0.115054608812483	0.37489155175306	-0.306901044513985	0.758918694008966	0.86005873907104
ENSMUSG00000001424	56463	Snd1	636.581525664062	0.24674965087577	0.0863638592988216	2.85709384549396	0.00427539410503054	0.0202015152508295
ENSMUSG00000001435	12822	Col18a1	365.916904960539	0.560229833271231	0.177128727416153	3.16284005109462	0.00156238147305296	0.00905516411190694
ENSMUSG00000001436	20509	Slc19a1	74.0660226808354	-0.073847514179519	0.172655971491602	-0.427714799213366	0.668858773948637	0.797419815314997
ENSMUSG00000001440	16211	Kpnb1	809.436102151168	0.392966412725504	0.105366267668481	3.72952768870882	0.000191839025796378	0.0017031053979446
ENSMUSG00000001441	19155	Npepps	1417.64342361574	-0.413909264136366	0.105414420670853	-3.92649564928844	8.61924506526349e-05	0.000872278274592362
ENSMUSG00000001444	57765	Tbx21	12.8838354961882	0.69063726679397	0.390997730134252	1.76634597483938	0.0773378228667484	0.185338618318788
ENSMUSG00000001445	107732	Mrpl10	287.136813597036	-0.138755322873188	0.110035874894837	-1.26100076912006	0.207308570043942	0.373608034931986
ENSMUSG00000001467	13121	Cyp51	108.320638293453	0.554860133784945	0.219653648242128	2.52606837275615	0.0115347030060793	0.0437205904293506
ENSMUSG00000001472	66855	Tcf25	2024.65903794996	-0.250600094111761	0.0613103449882375	-4.08740309909917	4.36228785807664e-05	0.000510928675461694
ENSMUSG00000001473	67951	Tubb6	1132.76524340014	0.952943461869611	0.298145683995824	3.19623430095657	0.00139233997030885	0.0082750561726283
ENSMUSG00000001482	23854	Def8	448.03775260511	-0.223522536829522	0.101015926749667	-2.21274549491038	0.02691519692368	0.0839754103139983
ENSMUSG00000001493	17285	Meox1	98.9700929775699	0.762438362367707	0.153752866033951	4.95885626092557	7.09094062138324e-07	1.74802916313556e-05
ENSMUSG00000001494	74499	Sost	0.106749372660218	-0.547027414227082	4.32804458550702	-0.126391353744106	0.899422145980042	NA
ENSMUSG00000001496	21869	Nkx2-1	0	NA	NA	NA	NA	NA
ENSMUSG00000001497	18511	Pax9	3.18696427126311	-0.329268705918894	0.736072707114845	-0.447331768636709	0.65463553249097	0.787412654035355
ENSMUSG00000001504	16372	Irx2	1.14282769569774	1.97253874868156	1.51465483210849	1.30230248295955	0.19281300321112	NA
ENSMUSG00000001506	12842	Col1a1	11896.4986574878	0.51883938948343	0.203855690374914	2.5451307664222	0.0109236821986425	0.0420185130276801
ENSMUSG00000001507	16400	Itga3	96.1513860700877	-0.558950782134476	0.158630029830861	-3.52361266483059	0.000425706068022262	0.00322251557112219
ENSMUSG00000001508	20391	Sgca	1971.49567899464	-0.576432281562142	0.0964467530714714	-5.97668934624455	2.27717846643529e-09	1.59052157501788e-07
ENSMUSG00000001510	13393	Dlx3	0.315901884446719	-1.26837476135472	2.89000619034943	-0.438883060385889	0.660746271561583	NA
ENSMUSG00000001517	14235	Foxm1	20.6161311674066	1.10338442553999	0.49738775564825	2.21835864073884	0.0265303887764716	0.0830357476374286
ENSMUSG00000001518	101142	Itfg2	141.503084436209	-0.0923499136625399	0.1376308441829	-0.670997218761621	0.50222230130726	0.670724080124683
ENSMUSG00000001520	60345	Nrip2	30.1456375000797	-0.882223264641103	0.282975592494615	-3.11766557978986	0.00182289517641365	0.0101892378195505
ENSMUSG00000001521	22158	Tulp3	133.117937775845	0.0433953204594641	0.1311850358933	0.330794744720426	0.740799530735549	0.848926463170475
ENSMUSG00000001524	14885	Gtf2h4	172.75634709755	-0.379215360183284	0.113329288389922	-3.34613730987662	0.000819458053204984	0.00543997661315282
ENSMUSG00000001525	22154	Tubb5	1272.70609354638	0.778950702925705	0.178727477240869	4.35831532426278	1.31067453014134e-05	0.000193510971279405
ENSMUSG00000001542	192657	Ell2	210.508594699139	0.105547052583911	0.145394030261479	0.725938007180168	0.467876775324494	0.641471186637323
ENSMUSG00000001552	16480	Jup	1426.36837877596	-0.521449358603909	0.124096991578442	-4.2019500390088	2.64625544369073e-05	0.00034380285351098
ENSMUSG00000001555	14230	Fkbp10	199.960250810095	0.650703371354179	0.194910703465765	3.33846915425284	0.00084241382772637	0.00557425570864769
ENSMUSG00000001558	66720	Klhl10	3.32647475521845	0.398838022015408	0.789467437234407	0.505198825441848	0.613419195207087	0.757802216663993
ENSMUSG00000001566	15285	Mnx1	0	NA	NA	NA	NA	NA
ENSMUSG00000001569	433864	Nom1	185.024806837742	-0.101477384342428	0.111701232085546	-0.90847148637279	0.363629171883221	0.543747043482101
ENSMUSG00000001576	67458	Ergic1	467.401022660201	0.21474230562883	0.0938958993614296	2.28702538757557	0.0221943412982757	0.0726796862710914
ENSMUSG00000001583	83813	Tnk1	0.941254476010116	-0.544352465223067	1.23231858019076	-0.441730307384314	0.658684375559032	NA
ENSMUSG00000001588	216859	Acap1	12.0093353350521	0.76109537794878	0.424065591486269	1.79475862514873	0.0726921655198227	0.176850365176538
ENSMUSG00000001604	21401	Tcea3	2083.64536214544	-0.778220638158584	0.127518254602444	-6.10281751883128	1.04214802410195e-09	7.88558671570472e-08
ENSMUSG00000001622	12994	Csn3	0	NA	NA	NA	NA	NA
ENSMUSG00000001627	15982	Ifrd1	439.122072390068	-0.218054713606426	0.174466083813405	-1.24984013419846	0.211357951853692	0.378175164971249
ENSMUSG00000001630	232533	Stk38l	134.532396429612	-0.117172200081727	0.147608608091126	-0.793803299123251	0.427309951742093	0.604317954355113
ENSMUSG00000001632	78783	Brpf1	166.093262931614	0.0947457750115081	0.138233029875099	0.685406194866135	0.493087635996991	0.663185016683248
ENSMUSG00000001642	11677	Akr1b3	1759.25143783207	-0.202500236700335	0.0761402272655567	-2.65956963845234	0.00782405537071879	0.0322838578588811
ENSMUSG00000001655	15422	Hoxc13	0.109739805881935	0.174313350024088	4.32804458550702	0.0402753129225603	0.967873635239457	NA
ENSMUSG00000001656	109663	Hoxc11	79.5832180579872	-0.461744567005962	0.175342726723188	-2.63338306432814	0.00845389407399922	0.034345126707791
ENSMUSG00000001657	15426	Hoxc8	96.1137523341176	-0.373564223535186	0.235462363967155	-1.58651351851413	0.11262286800139	0.243061950959292
ENSMUSG00000001661	15425	Hoxc6	145.921730753662	-0.178177581914278	0.134109947579238	-1.32859333055069	0.183982173612286	0.343539888668937
ENSMUSG00000001663	14871	Gstt1	83.8993307496364	-0.11836610125174	0.20054038072223	-0.590235746164706	0.555032610047246	0.713091258311349
ENSMUSG00000001665	103140	Gstt3	28.4000276166035	0.0482574844891289	0.241983773361622	0.199424464784309	0.841930724686237	0.911254819164945
ENSMUSG00000001666	13202	Ddt	36.9235334263129	-0.40538049719502	0.241265942561636	-1.68022263271352	0.0929140073962611	0.212597863206565
ENSMUSG00000001670	234724	Tat	1.22264323469412	-2.12842582455234	1.37680791296373	-1.54591341646975	0.122125479905572	NA
ENSMUSG00000001672	73608	Marveld3	0.361029696938437	0.136726412552661	2.27339104407395	0.0601420564706918	0.952042494346498	NA
ENSMUSG00000001674	66942	Ddx18	260.29494020756	-0.274321094469197	0.138436260290289	-1.98156966891456	0.0475274246951116	0.128970318648
ENSMUSG00000001687	24109	Ubl3	1045.5925885417	0.0998410333066741	0.0998735946170589	0.999673974782728	0.317468310698643	0.496954512983298
ENSMUSG00000001700	107022	Gramd3	177.356428552571	0.0384588138749098	0.135676880773189	0.283458859429421	0.776825114298611	0.87164833640646
ENSMUSG00000001707	66143	Eef1e1	166.134068008655	0.440238081459033	0.214107931075376	2.05615027546106	0.0397680334824654	0.113531657508719
ENSMUSG00000001729	11651	Akt1	926.1929084222	0.236763800873122	0.119021193850094	1.98925748611901	0.0466727896510882	0.127030819992903
ENSMUSG00000001739	60363	Cldn15	43.8902129664043	-0.177270078442799	0.220395044908926	-0.804328783871037	0.421207118406187	0.598574832034668
ENSMUSG00000001741	16170	Il16	58.0109101947994	0.66179317696742	0.211901207626605	3.12312130912239	0.00178943976840585	0.0100538341611637
ENSMUSG00000001750	27060	Tcirg1	393.770990012011	0.707944668220368	0.251785418946252	2.81169843425879	0.00492806827205073	0.0225804171119701
ENSMUSG00000001751	27419	Naglu	134.814965809814	0.440759436603183	0.178147167384957	2.47413104049389	0.0133560697787732	0.0487834879191828
ENSMUSG00000001755	71743	Coasy	133.135721786139	-0.0758632611930674	0.139821983671438	-0.542570339806761	0.587425665110846	0.738167001895506
ENSMUSG00000001761	319757	Smo	123.054126199207	0.508858490180927	0.207840268082113	2.44831521281472	0.0143526030255626	0.0514992192864535
ENSMUSG00000001763	232670	Tspan33	40.0978730301244	-0.077445020665718	0.212038658991894	-0.365240098357152	0.714932188597496	0.831011428094551
ENSMUSG00000001767	66877	Crnkl1	208.873977790465	0.148620026127118	0.124683179482701	1.19198136223129	0.233268553329824	0.404900301149389
ENSMUSG00000001768	74030	Rin2	263.335948303163	0.722506684099752	0.180508193897951	4.00262541271791	6.26434422865823e-05	0.000679392449058992
ENSMUSG00000001768	408057	Rin2	263.335948303163	0.722506684099752	0.180508193897951	4.00262541271791	6.26434422865823e-05	0.000679392449058992
ENSMUSG00000001773	53320	Folh1	0.564883845913371	-1.78348130693527	1.78980866238476	-0.996464786665484	0.319024368205962	NA
ENSMUSG00000001774	66917	Chordc1	593.280096836707	0.118755861604359	0.123287791590971	0.963241048216298	0.335426569903582	0.515100240393135
ENSMUSG00000001783	28088	Rtcb	500.539885484877	0.100452993631859	0.107487667876952	0.9345536619778	0.350018368905625	0.52964542370091
ENSMUSG00000001785	103136	Pwp1	223.88371869244	0.0111150001892072	0.115305851260281	0.0963958035756331	0.923206224866298	0.9577202500295
ENSMUSG00000001786	69754	Fbxo7	89.5000157402108	-0.28076506071959	0.147090434634918	-1.90879210749806	0.0562889154169001	0.146331482992495
ENSMUSG00000001794	12336	Capns1	2523.54600152576	-0.0684815776948983	0.080627695674079	-0.84935551143271	0.39568350054601	0.574695737396604
ENSMUSG00000001802	435965	Lrp3	121.399468932288	-0.201212942393465	0.141743945215107	-1.4195522926084	0.155738062763012	0.305714976915527
ENSMUSG00000001804	16769	Dsg4	0	NA	NA	NA	NA	NA
ENSMUSG00000001815	14029	Evx2	1.48953978013736	0.752798412617914	1.14287297641112	0.658689485319596	0.510095186361484	NA
ENSMUSG00000001819	15433	Hoxd13	0.628517647987305	-0.470273612736663	2.05996755070165	-0.228291757594182	0.819419431880297	NA
ENSMUSG00000001823	15432	Hoxd12	0	NA	NA	NA	NA	NA
ENSMUSG00000001827	14275	Folr1	5.14792164950842	0.426255804629257	0.60778031411533	0.701332035160936	0.483095825961062	0.654354553729334
ENSMUSG00000001829	20480	Clpb	661.142892341343	-0.503107950646613	0.101711898507003	-4.94640212238272	7.55977115934672e-07	1.84413283325915e-05
ENSMUSG00000001833	235072	Septin7	1005.77408851945	0.329591354707519	0.0987961039299318	3.33607644023364	0.000849697970608099	0.00561336444285318
ENSMUSG00000001844	72881	Zdhhc4	241.016020122471	-0.289675548212004	0.118948503683316	-2.4353021622132	0.014879358714581	0.0529937325846833
ENSMUSG00000001847	19353	Rac1	1507.28602305748	0.296882116117105	0.11177330586102	2.65610929040832	0.00790479914151194	0.0325424171353371
ENSMUSG00000001855	227720	Nup214	109.130571122074	-0.215554206241936	0.211853057351132	-1.01747035863952	0.308929726159149	0.488784844563904
ENSMUSG00000001864	108897	Aif1l	167.49724315052	0.775147438648795	0.292051402733133	2.65414728843847	0.00795091132251822	0.0326917470830787
ENSMUSG00000001865	12873	Cpa3	45.3007559344063	0.412152055793295	0.222055628293762	1.85607570031078	0.063442768780564	0.159893386730846
ENSMUSG00000001870	268977	Ltbp1	227.873769268467	0.70351247276031	0.136085477402658	5.16963665916178	2.34549564984994e-07	7.19226658558112e-06
ENSMUSG00000001891	216558	Ugp2	5429.51709919999	-0.378539883782905	0.0985381925310954	-3.84155497538125	0.000122257346030825	0.00117057648712818
ENSMUSG00000001901	192775	Kcnh6	0.110434231680082	-0.547027414227082	4.32804458550702	-0.126391353744106	0.899422145980042	NA
ENSMUSG00000001909	212528	Trmt1	408.015500509183	-0.194722998576855	0.0883940929696216	-2.20289605374168	0.0276020758360527	0.0857332435318218
ENSMUSG00000001910	66830	Nacc1	407.096369498027	-0.133792896638546	0.136774706411576	-0.978199114066768	0.32797585455653	0.508194668835033
ENSMUSG00000001911	18032	Nfix	3890.84906895761	-0.445867621349632	0.0788440594429989	-5.65505663330255	1.55794893678352e-08	7.78688606201525e-07
ENSMUSG00000001918	20514	Slc1a5	465.662933195496	-0.0501639638751709	0.20682180389918	-0.242546786312842	0.808356508625505	0.890581649947776
ENSMUSG00000001924	22201	Uba1	2044.83102670581	-0.171900229937712	0.0851546656756597	-2.01868245942567	0.0435202342522831	0.120968487860428
ENSMUSG00000001930	22371	Vwf	336.815399449857	-0.491008710348483	0.141264030748863	-3.47582259790811	0.000509289057025756	0.00373098177858761
ENSMUSG00000001942	22619	Siae	92.7052705975524	0.14741326491309	0.152670349672144	0.965565777701149	0.334261506695029	0.514035572584075
ENSMUSG00000001943	57276	Vsig2	40.7698114474335	-0.383500634467123	0.242949074228388	-1.57852272409405	0.114445571849107	0.245536679745577
ENSMUSG00000001946	69524	Esam	416.513086155745	-0.381958734438767	0.109293232534707	-3.49480681996915	0.00047440498900981	0.00351959833879997
ENSMUSG00000001948	20686	Spa17	25.6663217434181	-0.794839811628836	0.345076212960765	-2.30337468007164	0.0212577710920834	0.0702886932488389
ENSMUSG00000001962	108160	Fam50a	192.615692521719	-0.0693289846000309	0.125693245424575	-0.551572873831419	0.581241025687177	0.733632481088191
ENSMUSG00000001964	13726	Emd	260.865617180095	0.0616253184531745	0.120913060657201	0.509666351328974	0.610285230518802	0.755472378065538
ENSMUSG00000001983	70207	Taco1	337.9886259063	-0.236660089355925	0.114960654012657	-2.05861815408487	0.0395308322725396	0.113091532060631
ENSMUSG00000001985	14807	Grik3	2.01018498001441	0.229180592130872	0.965261751875183	0.237428440198371	0.812324428331185	NA
ENSMUSG00000001986	53623	Gria3	24.1358445071588	0.417849195596996	0.300930909341333	1.3885220249112	0.164978142797528	0.318032848298736
ENSMUSG00000001988	18142	Npas1	3.32714999697067	0.975836926961571	0.88922669058769	1.09739950148892	0.27246679125338	0.448332534286513
ENSMUSG00000001995	244668	Sipa1l2	128.787448325589	0.293299740052983	0.140344297875414	2.08985861551247	0.0366305020840561	0.106813367718432
ENSMUSG00000001998	108011	Ap4e1	69.739557277832	0.143715847124155	0.19850971345335	0.723973878275375	0.469081772054473	0.6426919676803
ENSMUSG00000001999	109778	Blvra	153.035047601513	0.0984251934299884	0.136454294666184	0.721305208244061	0.470721753262961	0.643918808786712
ENSMUSG00000002006	245469	Pdzd4	28.3235898372944	0.280020320259082	0.267768704601084	1.0457544718538	0.295674406225995	0.473681875647684
ENSMUSG00000002007	56504	Srpk3	548.91732294645	-0.119713529552225	0.0934240335833625	-1.28139971012282	0.200053305933011	0.364755826881875
ENSMUSG00000002010	15929	Idh3g	3478.79483791386	-0.613554222497212	0.0927628591381559	-6.61422284950724	3.73508715068117e-11	5.70525835427412e-09
ENSMUSG00000002012	93843	Pnck	125.798057495316	-0.106502294307444	0.16765582244563	-0.635243636360929	0.525269527630255	0.6897768493244
ENSMUSG00000002014	20832	Ssr4	573.59314160032	-0.159031649042827	0.0759666921074606	-2.09343917223439	0.0363099686854291	0.106067940696095
ENSMUSG00000002015	27061	Bcap31	637.587802945423	0.193606373526783	0.115089179008477	1.68222916519826	0.0925244107079758	0.211854716812995
ENSMUSG00000002017	72722	Fam98a	473.247173708903	-0.185149177457272	0.0879217295860551	-2.10584093749036	0.0352181715002947	0.103675395353173
ENSMUSG00000002020	16997	Ltbp2	89.6646110560111	1.67371199368643	0.507268486401805	3.2994598295639	0.000968710905933123	0.00623413173549092
ENSMUSG00000002028	214162	Kmt2a	290.361718063633	-0.0479144782175569	0.131245733686185	-0.365074558020476	0.715055751900597	0.831061304054609
ENSMUSG00000002031	76568	Ift46	158.70511098473	-0.0918842214320856	0.132745702711434	-0.692182266960656	0.488822873501182	0.659549928975924
ENSMUSG00000002032	71687	Tmem25	140.45617367196	-0.252511337034746	0.144176496315429	-1.75140430991125	0.0798762911315403	0.189890633055112
ENSMUSG00000002033	12502	Cd3g	2.25562815393878	1.85965429817565	1.37309534643688	1.35435190498706	0.175624133880257	NA
ENSMUSG00000002043	67091	Trappc6a	50.5345095448233	0.195985255652139	0.190870204649705	1.02679858289994	0.304515316809716	0.484049634111846
ENSMUSG00000002052	20926	Supt6	547.038671339915	-0.0233119836597448	0.134410207301818	-0.173439087162463	0.862306303518079	0.923197577931317
ENSMUSG00000002055	54141	Spag5	50.4834101781997	0.339128968783026	0.240514735632083	1.41001326963099	0.158535764726504	0.309349156959166
ENSMUSG00000002057	15218	Foxn1	0.167044665709091	0.230171475247598	4.3205380027478	0.0532737994900663	0.957513755527007	NA
ENSMUSG00000002058	22248	Unc119	106.912249277551	0.0773375724997085	0.145395858387727	0.531910422740325	0.594788038148585	0.744179414797555
ENSMUSG00000002059	19376	Rab34	106.059483425382	0.516106878090768	0.197344772358802	2.61525487562654	0.00891608941619618	0.03583328324481
ENSMUSG00000002064	20316	Sdf2	430.907131020625	-0.162882541119739	0.126547742453397	-1.28712324662546	0.19805133403213	0.362174601983763
ENSMUSG00000002068	12447	Ccne1	15.0240838070928	0.60178392110734	0.397911080159699	1.51235778824208	0.130442867277053	0.269629217500462
ENSMUSG00000002076	74377	Hsf2bp	6.73656385450893	1.40686485257858	0.606635623613056	2.31912666816275	0.02038816915788	0.0680883197213711
ENSMUSG00000002083	170770	Bbc3	43.9851717469172	0.632438497657982	0.252131484814193	2.50836779914279	0.0121290344731064	0.0454671879423052
ENSMUSG00000002100	17868	Mybpc3	0.812147723756262	2.13559350186508	1.50832202842675	1.41587370708403	0.156812484343088	NA
ENSMUSG00000002102	19182	Psmc3	2584.40003397521	-0.185358328330219	0.0841289771442061	-2.20326378166342	0.0275761621453192	0.0857064893818508
ENSMUSG00000002103	11432	Acp2	295.211065672026	0.0482450782165456	0.131937809877326	0.365665295349402	0.714614845543904	0.830938036110527
ENSMUSG00000002104	19400	Rapsn	387.815179956717	-0.17858835082713	0.111095317362979	-1.60752365685794	0.107939544168596	0.235787745240782
ENSMUSG00000002105	68427	Slc39a13	332.267359433669	5.56039660150378e-05	0.0904494560208886	0.000614751801295482	0.999509499059916	0.99958953991442
ENSMUSG00000002107	14007	Celf2	1036.18411595784	-0.144760986212456	0.0987170926371167	-1.4664227070037	0.142533163980541	0.286468523376533
ENSMUSG00000002108	22259	Nr1h3	181.267573004752	-0.251408880954675	0.137056349018989	-1.83434684167636	0.0666025250829257	0.165685185685744
ENSMUSG00000002109	107986	Ddb2	24.5776276015078	0.130873129342883	0.299121967940807	0.437524299013644	0.661731157819972	0.792448273989568
ENSMUSG00000002111	20375	Spi1	203.253521657451	1.13395148787145	0.295293203131552	3.84008665233746	0.000122990891174792	0.00117691049494192
ENSMUSG00000002129	67465	Sf3a1	263.726772260183	0.0615719037760526	0.102097915647323	0.603067196677555	0.546463987683124	0.706319289418187
ENSMUSG00000002147	20852	Stat6	416.697200031792	0.183359199118154	0.0957422378173512	1.91513383537108	0.0554754377763215	0.144792487227116
ENSMUSG00000002190	12745	Clgn	0.320082212542322	-0.599785313743629	2.59028982147742	-0.231551430565993	0.816886435015512	NA
ENSMUSG00000002204	16541	Napsa	24.3619990213891	0.856914302886019	0.32208936324523	2.66048619008132	0.0078027926995886	0.0322205264987559
ENSMUSG00000002205	101568	Vrk3	196.273564846841	-0.104071206135595	0.116269193966603	-0.895088394312675	0.370739837430234	0.551303057315962
ENSMUSG00000002210	71997	Smg9	208.772394474575	-0.381370876972202	0.110461789153899	-3.45251403126256	0.00055538859045977	0.00398300619678564
ENSMUSG00000002221	55982	Paxip1	108.943766554254	0.206385010310591	0.146600779690187	1.40780295129908	0.159189426231969	0.310363609613559
ENSMUSG00000002222	68477	Rmnd5a	1463.17920821255	-0.219739870184939	0.135153717633456	-1.6258514677405	0.103981256512518	0.229535260211944
ENSMUSG00000002227	17454	Mov10	64.8344054224512	0.653233564978418	0.256741924003598	2.54431981653788	0.0109490784518118	0.04208648593989
ENSMUSG00000002228	71887	Ppm1j	536.091966453524	-0.59668204721001	0.0863548293781546	-6.90965463665143	4.85835021222422e-12	1.10259944876278e-09
ENSMUSG00000002233	11853	Rhoc	668.040181468303	0.24998030099384	0.149480047574652	1.67233222794498	0.0944588279632041	0.215138668371043
ENSMUSG00000002240	73779	Prr27	0	NA	NA	NA	NA	NA
ENSMUSG00000002249	21678	Tead3	137.326951070188	0.0939054846482008	0.143325924205816	0.65518841178622	0.5123464543575	0.678879233588775
ENSMUSG00000002250	19015	Ppard	358.17996864543	-0.519639652627637	0.139009820144029	-3.73815067229951	0.000185378842722929	0.00165745722399538
ENSMUSG00000002250	69050	Ppard	358.17996864543	-0.519639652627637	0.139009820144029	-3.73815067229951	0.000185378842722929	0.00165745722399538
ENSMUSG00000002257	23853	Def6	39.8753685063722	0.650104954254306	0.229228089589933	2.83606147665969	0.00456736533619229	0.021297865636156
ENSMUSG00000002265	18616	Peg3	716.767663180844	0.62399577471522	0.194152224284401	3.21395120254285	0.00130921920971472	0.00790464675418446
ENSMUSG00000002266	22776	Zim1	122.44712647454	0.798511688738409	0.233832520240787	3.41488723602752	0.000638084218896622	0.00446631626280359
ENSMUSG00000002274	70083	Metrn	17.7042205541191	-0.559813465756845	0.395547833893781	-1.41528638962835	0.156984543905355	0.307239298956906
ENSMUSG00000002279	76483	Lmf1	189.811953077629	-0.40116442993187	0.147249244528918	-2.72439041174901	0.0064420305386025	0.0277440176871988
ENSMUSG00000002280	67563	Ciao3	393.711392674824	-0.434346813798618	0.108544732595521	-4.00154667492856	6.29297780804249e-05	0.000681593302151401
ENSMUSG00000002289	57875	Angptl4	250.122151496087	0.592000371006745	0.754980471509253	0.784126733534312	0.43296575034184	0.609613389351053
ENSMUSG00000002297	27214	Dbf4	22.3447227977304	1.42009875867258	0.371672820691827	3.82083025610865	0.000133003172275309	0.00125653401599286
ENSMUSG00000002307	13163	Daxx	180.193963139344	0.187672832276227	0.130489062755939	1.43822653265003	0.15036978929205	0.298113032046247
ENSMUSG00000002308	54219	Cd320	171.663671293323	-0.528248315066288	0.140329577964453	-3.76434050988239	0.000166989207802938	0.0015171048428745
ENSMUSG00000002319	75751	Ipo4	286.762355972619	-0.29420299844388	0.106662617036751	-2.75825782844342	0.00581103444534212	0.0256266425452054
ENSMUSG00000002320	74140	Tm9sf1	190.667277899077	0.624829087955531	0.131424484440001	4.75428220713914	1.99152695651476e-06	4.07378179940892e-05
ENSMUSG00000002324	56739	Rec8	7.51900204154279	0.176365926499865	0.568902743019619	0.310010680496548	0.756552834356869	0.858449008937008
ENSMUSG00000002325	16391	Irf9	169.227684280545	0.665491800845594	0.146090001902745	4.5553548646582	5.22972143100989e-06	9.01630454308288e-05
ENSMUSG00000002326	105446	Gmpr2	10.3818342551962	0.995271799927581	0.432441655008216	2.30151695240522	0.0213624282905491	0.070591898095579
ENSMUSG00000002329	67881	Mdp1	265.15506250438	-0.186094876089496	0.0984058189492757	-1.89109625910863	0.0586114958099696	0.150691566386368
ENSMUSG00000002332	52585	Dhrs1	415.189481911682	-0.111013507664778	0.106613395003559	-1.04127166817145	0.297749481917391	0.476119512029922
ENSMUSG00000002341	13004	Ncan	0.840168362143571	0.137114607788981	2.24649370113901	0.0610349397905999	0.951331382985974	NA
ENSMUSG00000002342	234371	Tmem161a	662.052197329664	-0.111002659443666	0.083766031035771	-1.32515123458892	0.185120995814934	0.345153725256592
ENSMUSG00000002343	76813	Armc6	128.830108002824	-0.351674941717453	0.136379461054474	-2.5786503260706	0.00991871327807341	0.0390159927356996
ENSMUSG00000002345	72368	Borcs8	72.0248682178552	-0.184774691241527	0.172529089120691	-1.0709770287622	0.284179758519324	0.461234754045664
ENSMUSG00000002346	73095	Slc25a42	362.362208872668	-0.528492692746431	0.145631348525459	-3.62897616548569	0.000284547508003267	0.00232764988528798
ENSMUSG00000002365	66616	Snx9	400.060939375609	0.375954165213239	0.0977192301028864	3.84728947227076	0.000119431828033424	0.00114823164551663
ENSMUSG00000002372	71810	Ranbp3	579.162070370743	-0.157784427157937	0.0863165306380663	-1.82797461843714	0.0675533610127033	0.1674897045497
ENSMUSG00000002379	69875	Ndufa11	603.758705746751	-0.594221546300199	0.138377346668807	-4.29421115959401	1.75315557360951e-05	0.000246376394626603
ENSMUSG00000002384	12164	Bmp8b	0.356158208472467	1.83971553360361	2.76863267241494	0.664485235594263	0.506379795514954	NA
ENSMUSG00000002393	13864	Nr2f6	165.370865533273	-0.0854967309814665	0.124371076498436	-0.687432587934076	0.491810167778036	0.662066171004383
ENSMUSG00000002395	67023	Use1	694.807624602633	-0.345261471009413	0.099870554104211	-3.45708977091632	0.000546042914826408	0.00393150898675014
ENSMUSG00000002396	77090	Ocel1	82.6968201879307	-0.141190737473757	0.161579426811866	-0.873816303595082	0.382218300254801	0.561879465674085
ENSMUSG00000002409	13549	Dyrk1b	596.038049992782	-0.424474304243104	0.0909591940367142	-4.66664539784479	3.06157022602802e-06	5.80490763041786e-05
ENSMUSG00000002413	109880	Braf	92.507833914449	0.168971249647806	0.165422434405189	1.02145304689401	0.307039843723566	0.487058263686999
ENSMUSG00000002416	68198	Ndufb2	43.3002024466354	-0.322268668986869	0.252240225089335	-1.27762599669713	0.201381329722448	0.366441377531028
ENSMUSG00000002428	20585	Hltf	103.716804044493	0.387051540456063	0.157224185860273	2.46178117150525	0.0138248987626475	0.0500145172193165
ENSMUSG00000002455	68879	Prpf6	497.883442607424	-0.0794377069460947	0.0872560289112239	-0.910397916766488	0.362612695992499	0.542574558573781
ENSMUSG00000002458	56470	Rgs19	70.4666880709207	0.596030945007088	0.188945560464421	3.15451150872275	0.00160767037381803	0.00924877317482642
ENSMUSG00000002459	58175	Rgs20	1.06954767372699	2.78919131802289	1.44791923270942	1.92634454672145	0.0540613666019459	NA
ENSMUSG00000002475	106861	Abhd3	8.08817839684218	0.901731660009613	0.601869922758134	1.49821685037413	0.134076919073684	0.274771557793313
ENSMUSG00000002477	20641	Snrpd1	171.351320217369	0.170652769188445	0.179355334880575	0.9514786348679	0.341361459176243	0.521129431045816
ENSMUSG00000002486	77832	Tchp	56.4362951589472	-0.045469211535858	0.218355853430103	-0.208234452255767	0.835045909137534	0.907279972853152
ENSMUSG00000002489	21844	Tiam1	93.1804432377401	0.227932212754558	0.201604458072346	1.1305911334201	0.258227221126999	0.432868277138428
ENSMUSG00000002496	22084	Tsc2	865.52560890575	-0.48000694469248	0.13746203053051	-3.49192386319321	0.000479554921094649	0.00354653648433074
ENSMUSG00000002500	66211	Rpl3l	6254.4440270898	-0.750264568706559	0.106867420408614	-7.02051725247858	2.21048363385943e-12	6.29364457212884e-10
ENSMUSG00000002504	65962	Slc9a3r2	591.520185575234	-0.79927468587988	0.148655580793343	-5.37668805714742	7.58684510522397e-08	2.83751479175699e-06
ENSMUSG00000002524	67959	Puf60	814.376391381915	-0.0589960163495989	0.0883192703263368	-0.667985776282011	0.504142671928491	0.672354780089698
ENSMUSG00000002546	99412	Golga2	688.975707783001	-0.332647615637191	0.108766076178487	-3.05837653912705	0.00222539757030129	0.012003926696041
ENSMUSG00000002550	22245	Uck1	151.322978603192	-0.165447670304046	0.183703506363958	-0.900623366307757	0.367788606595234	0.548461403849682
ENSMUSG00000002565	20259	Scin	19.1988841865683	-0.00166643656295559	0.349013972317699	-0.00477469870873443	0.996190356093038	0.997716476498842
ENSMUSG00000002578	22781	Ikzf4	17.153845978787	-0.76414525070218	0.415179121752212	-1.84051945453615	0.0656920107525363	0.164011213425347
ENSMUSG00000002580	103742	Mien1	48.0321247602263	-0.362721921360101	0.212537804700075	-1.70662307287854	0.0878921338152635	0.204165582017718
ENSMUSG00000002588	18979	Pon1	23.8929962484847	-0.714861894849413	0.557168439682822	-1.28302653907741	0.199482778392599	0.364203142320001
ENSMUSG00000002602	26362	Axl	843.18033896655	0.627652857269033	0.0934915199990702	6.71347366344322	1.90044932249592e-11	3.4512159696526e-09
ENSMUSG00000002603	21803	Tgfb1	420.342407858143	0.396794703545733	0.203002370124046	1.95463089077861	0.0506266525024345	0.135335624550178
ENSMUSG00000002608	52132	Ccdc97	567.027179165886	-0.329745518747782	0.0853385894216745	-3.86396729758967	0.000111560163773277	0.00108241908445499
ENSMUSG00000002617	22700	Zfp40	23.0472006952075	0.575856823582674	0.316336943604339	1.82039067906951	0.0686995308732467	0.169739249069138
ENSMUSG00000002625	54194	Akap8l	351.011843614887	-0.343068721733837	0.14076131095705	-2.4372373303522	0.0147999622552569	0.0527684518106279
ENSMUSG00000002633	20423	Shh	0.183919126333062	-0.547028416396834	3.88175339134846	-0.140923021440784	0.887930755155717	NA
ENSMUSG00000002635	68079	Pdcd2l	147.502521588814	-0.0568982981767203	0.137548979416876	-0.413658454013503	0.679124257563813	0.805077744659677
ENSMUSG00000002658	98053	Gtf2f1	322.781763634595	-0.18200802380505	0.113589356841844	-1.60233343039762	0.109081896895464	0.237616223225306
ENSMUSG00000002660	53895	Clpp	440.273713274735	-0.522781081695979	0.138285216198865	-3.78045532317916	0.000156541809379208	0.00143817837689363
ENSMUSG00000002661	66400	Alkbh7	313.473577671787	-0.619742936201166	0.12676846679522	-4.88877835212988	1.0146365625063e-06	2.34214150907647e-05
ENSMUSG00000002664	19197	Pspn	2.17075180926786	-0.77636792093479	0.861915269301306	-0.900747380382455	0.367722650675166	NA
ENSMUSG00000002668	70785	Dennd1c	34.4089517926574	0.593803978541072	0.291092538808126	2.03991480156927	0.0413588122482579	0.11688888593905
ENSMUSG00000002679	69792	Med6	105.400120836845	0.136848463048783	0.145211712387874	0.94240650976726	0.345984555645881	0.5252435052458
ENSMUSG00000002688	18760	Prkd1	34.6928529021026	-0.12314698649422	0.266116464732872	-0.462755983993078	0.643539284607011	0.779804720315613
ENSMUSG00000002699	16822	Lcp2	51.7513546812607	1.13480759525911	0.276153217206631	4.10934048401832	3.967906867254e-05	0.000470962017708056
ENSMUSG00000002718	110750	Cse1l	625.151473756705	-0.0352679080652753	0.0872315978864875	-0.404301983682205	0.685990666948266	0.810337630861699
ENSMUSG00000002728	67877	Naa20	408.107916875367	0.0731326983326843	0.116371843128494	0.628439804394379	0.529715868523313	0.693279640866834
ENSMUSG00000002731	23992	Prkra	84.2841810463096	0.313517985186662	0.196155916217934	1.59831011590971	0.109973977197088	0.238986129944052
ENSMUSG00000002732	14231	Fkbp7	132.66157571634	0.456126643144001	0.179173668246792	2.54572364124251	0.01090514847108	0.0419861194626551
ENSMUSG00000002733	83435	Plekha3	139.858267385749	0.31790697174243	0.169439534048657	1.87622666414521	0.0606241621758081	0.15437917346817
ENSMUSG00000002741	56418	Ykt6	762.014687706674	0.0231455373530297	0.0922849518535959	0.250805108396747	0.80196479186154	0.886228029627114
ENSMUSG00000002748	22385	Baz1b	627.98356784483	-0.0949019487360847	0.0846475748041386	-1.12114196958003	0.262227436296158	0.437152715098369
ENSMUSG00000002763	224824	Pex6	444.958856495477	-0.514837729923939	0.137475356123522	-3.74494559927785	0.000180432868245498	0.00162300209059131
ENSMUSG00000002767	27398	Mrpl2	960.161863627228	-0.369809732177935	0.125351857408101	-2.95017353411817	0.00317595490420004	0.0159103921402707
ENSMUSG00000002768	17256	Mea1	220.515401754958	-0.257424798514742	0.123006235104411	-2.09277845384206	0.0363689360515059	0.106212465731117
ENSMUSG00000002769	14711	Gnmt	22.1749716410923	-1.72065901309055	0.44120581739595	-3.89990101047643	9.62320252488319e-05	0.00096020526292241
ENSMUSG00000002771	14814	Grin2d	12.8141410181009	0.00982508227707266	0.438636723185758	0.0223991329447166	0.982129571989169	0.990126185824758
ENSMUSG00000002778	68137	Kdelr1	620.438624263807	0.128793141111673	0.1073345079868	1.19992296538511	0.230169259922193	0.401139516332727
ENSMUSG00000002781	70209	Tmem143	693.761348057112	-0.514676543312373	0.099774305082633	-5.15840769711319	2.49058836482418e-07	7.52424699347253e-06
ENSMUSG00000002791	NA	Pdxk-ps	0.693751319023637	-1.98877237132024	1.78373915115241	-1.11494574194627	0.264873673416494	NA
ENSMUSG00000002797	110175	Ggct	112.216238035022	-0.287262827062076	0.208827320726391	-1.37559983082124	0.168945559111559	0.323372771875026
ENSMUSG00000002799	16450	Jag2	449.761925786158	-0.24302851603845	0.112931382848381	-2.15200159520525	0.0313972287253237	0.0948532913653772
ENSMUSG00000002803	399566	Btbd6	188.775334180762	-0.222071047507218	0.1351587597068	-1.64303851255337	0.100374965234968	0.224146527093909
ENSMUSG00000002804	66174	Nudt14	107.262145131431	0.0555847221365986	0.155865399336724	0.356620021974962	0.721376286423392	0.835886141460753
ENSMUSG00000002808	105298	Epdr1	1360.77487143691	-0.16166106286984	0.119350627377304	-1.35450534632533	0.175575208879438	0.332668816824197
ENSMUSG00000002812	14248	Flii	1008.2001107369	-0.152144681743751	0.141134850942008	-1.07800929910831	0.281029606250832	0.457940965559682
ENSMUSG00000002814	21975	Top3a	57.9903211254273	0.188927156277192	0.264103158340357	0.715353642358631	0.474390549877509	0.646766695628796
ENSMUSG00000002820	235040	Atg4d	556.334122442145	-0.51085361959412	0.11965095358482	-4.26953237135697	1.95883219628293e-05	0.000268133613199734
ENSMUSG00000002825	60507	Qtrt1	75.1889176548812	-0.214084254626002	0.202976464645871	-1.0547245218775	0.291551333283735	0.469561981788466
ENSMUSG00000002831	57435	Plin4	1386.42854454285	-0.837156040895387	0.195638446293182	-4.2790977783622	1.87652418676792e-05	0.000259255378770371
ENSMUSG00000002833	15193	Hdgfl2	416.100067164355	-0.201721891425839	0.0922550270270249	-2.1865680161445	0.0287740743479852	0.0885906699105
ENSMUSG00000002835	27221	Chaf1a	22.5806469218484	0.951678110125529	0.338129301448967	2.81453901228718	0.00488472483324985	0.0224398795500733
ENSMUSG00000002844	11544	Adprh	550.203355894634	-0.00136968176140258	0.0903075095742376	-0.0151668645039606	0.98789905691589	0.99344928653729
ENSMUSG00000002845	67846	Tmem39a	112.867836039538	0.453529666427865	0.143030236632396	3.17086566523333	0.00151985410429576	0.00887160552878924
ENSMUSG00000002846	76916	Timmdc1	427.134293978638	-0.391764543354073	0.110686114566517	-3.5394190580124	0.000401008724391627	0.00307414943314107
ENSMUSG00000002847	85031	Pla1a	96.6742455434583	-0.00833758859564808	0.215809372918376	-0.0386340430116608	0.969182160146471	0.982649703811037
ENSMUSG00000002870	17216	Mcm2	124.898334272773	0.369414865158665	0.148256576755601	2.49172666226902	0.0127123826256028	0.047069194182164
ENSMUSG00000002871	24100	Tpra1	369.916155069748	-0.305845197138667	0.143710471950299	-2.12820397141582	0.0333201757050583	0.0994368776891126
ENSMUSG00000002881	17936	Nab1	189.225774132481	0.220823183093885	0.164384022721334	1.34333726257708	0.179162791492258	0.337548895002821
ENSMUSG00000002885	26364	Adgre5	269.091971651884	0.174468073440923	0.145286485893966	1.20085548471628	0.229807264560297	0.400850579719691
ENSMUSG00000002897	16172	Il17ra	83.3465921642929	0.689507573278312	0.194258980821078	3.54942443517391	0.000386074252925928	0.00298204044887588
ENSMUSG00000002900	16777	Lamb1	806.799544553236	0.313224120122068	0.156715918423913	1.99867456523979	0.0456435767298204	0.125183725539817
ENSMUSG00000002908	84036	Kcnn1	219.773293386132	-0.702385483206382	0.125535293270184	-5.59512360953878	2.20464639556016e-08	1.03294252558347e-06
ENSMUSG00000002910	70807	Arrdc2	288.54240818855	-1.82083071234658	0.562352569290811	-3.23788102300813	0.0012042101778693	0.00740188459838129
ENSMUSG00000002930	19051	Ppp1r17	0	NA	NA	NA	NA	NA
ENSMUSG00000002944	12491	Cd36	2956.7139123227	0.0737253481483911	0.0858212303965443	0.859057226373204	0.390308944391504	0.569318106839334
ENSMUSG00000002948	26400	Map2k7	636.64851387101	-0.367982914367804	0.0974394577077563	-3.77652875975019	0.00015902920443292	0.00145775284198073
ENSMUSG00000002949	21856	Timm44	884.935274101974	-0.398226234684946	0.080968947907177	-4.91825872730215	8.73174541323754e-07	2.07132144610897e-05
ENSMUSG00000002957	11772	Ap2a2	942.690940362763	-0.0942760449502676	0.0787521262674819	-1.19712380374415	0.231258303213662	0.402393879242424
ENSMUSG00000002963	59047	Pnkp	339.972870534532	-0.243670624638744	0.106418416782347	-2.28974111818551	0.0220363283010298	0.0722635934494443
ENSMUSG00000002968	75613	Med25	811.371984594767	-0.446503313715354	0.111249308405552	-4.01353788274941	5.98153974580373e-05	0.000655243201108687
ENSMUSG00000002980	57278	Bcam	984.846770956834	-0.136910621375093	0.094927792965901	-1.44226066041873	0.149228853633216	0.29620285519491
ENSMUSG00000002981	56457	Clptm1	881.034622856899	-0.256844663235099	0.0783136461638104	-3.27969231183351	0.0010392035618186	0.00658323372649736
ENSMUSG00000002983	19698	Relb	151.536005779354	-0.0742871047599473	0.121907300686551	-0.609373715450849	0.542276756069282	0.702991815240294
ENSMUSG00000002984	53333	Tomm40	423.309199801343	-0.238620801038548	0.120087315116316	-1.98706083825275	0.0469156553458544	0.127585602491289
ENSMUSG00000002985	11816	Apoe	9994.88379193509	0.618967067110034	0.366909725648341	1.68697372634726	0.0916084041029481	0.210464964388331
ENSMUSG00000002992	11813	Apoc2	0	NA	NA	NA	NA	NA
ENSMUSG00000002996	73389	Hbp1	179.404203391435	0.4987584850597	0.182896610162435	2.7269968788199	0.00639136436432011	0.0275766787672777
ENSMUSG00000002997	19088	Prkar2b	74.1836894902972	0.730718666556139	0.605607703409792	1.20658746981243	0.227591054682961	0.398192739913112
ENSMUSG00000003031	12576	Cdkn1b	524.773195460085	0.614578578462861	0.164430310053088	3.73762342395657	0.000185767903651791	0.00166002767484137
ENSMUSG00000003032	16600	Klf4	415.875941275644	-0.164776574275306	0.246924259744565	-0.667316263075009	0.504570140422128	0.672511458750315
ENSMUSG00000003033	11767	Ap1m1	257.85413390308	0.030817553757056	0.1396823752926	0.22062592859336	0.825383710403725	0.900959818529252
ENSMUSG00000003037	17274	Rab8a	230.501305366637	0.471671347602077	0.109955456551299	4.28965839800792	1.78948147689018e-05	0.000250190635229197
ENSMUSG00000003038	15331	Hmgn2	529.83505394987	0.529556568445781	0.131925476540298	4.01405840883223	5.9683567048907e-05	0.000654237571996872
ENSMUSG00000003039	67922	Fam32a	218.094559560145	0.470920414534806	0.131884070752657	3.57071488502957	0.000356008251460507	0.00279796087216793
ENSMUSG00000003051	13710	Elf3	4.08571960777196	-0.439350191641651	0.74572961643716	-0.589154811553168	0.555757427389644	0.71353490913247
ENSMUSG00000003053	13095	Cyp2c29	0.299475285015816	-1.96733663735414	2.94722844052652	-0.66752091907836	0.504439452083298	NA
ENSMUSG00000003062	76205	Stard3nl	87.104236891935	0.789230815125882	0.184190937737366	4.28485149606671	1.82861291331896e-05	0.000253923954590357
ENSMUSG00000003068	20869	Stk11	1427.9987232715	-0.304668961056832	0.103758493331127	-2.93632792146021	0.00332123028436602	0.0165494474901458
ENSMUSG00000003070	13637	Efna2	16.44346983291	0.236152955197149	0.320053732914982	0.737854087956785	0.46060312115795	0.635175279463849
ENSMUSG00000003072	66043	Atp5d	5588.35851963327	-0.753533632083403	0.113699733152636	-6.62740018107013	3.41650510205876e-11	5.43102225523871e-09
ENSMUSG00000003099	19060	Ppp5c	731.527335406222	-0.200205904836461	0.0954173967377943	-2.09821176935506	0.0358864424037274	0.10516908994917
ENSMUSG00000003119	69131	Cdk12	89.2744076023122	0.093283754201315	0.19496788952979	0.478457013748728	0.632324962601909	0.771763828112167
ENSMUSG00000003123	16890	Lipe	375.969399436022	-0.449669123557898	0.360550579396871	-1.24717348758697	0.212333891938261	0.37956744283484
ENSMUSG00000003131	18475	Pafah1b2	292.008721481394	0.49595012231801	0.13299999876854	3.72894832263203	0.000192280575498877	0.00170517293866177
ENSMUSG00000003134	54610	Tbc1d8	152.067280872957	0.368497391463248	0.136384375480624	2.70190328008358	0.00689438146405964	0.0291738902906524
ENSMUSG00000003135	52846	Cnot11	363.855717006459	-0.234107382592448	0.112166842393833	-2.08713535654739	0.0368759008360974	0.107394438582118
ENSMUSG00000003153	20527	Slc2a3	48.713471287293	0.301665960207624	0.226992989632416	1.3289659768618	0.18385919496882	0.343388719297268
ENSMUSG00000003154	60611	Foxj2	373.934799375575	-0.127124981039316	0.112683070870116	-1.12816397403517	0.259250675434471	0.434075452672394
ENSMUSG00000003161	109552	Sri	254.297528373853	0.461857183462714	0.128167182531487	3.60355259700936	0.000313897191305279	0.00251981124493786
ENSMUSG00000003166	13356	Dgcr2	245.040024845825	-0.0237330240764764	0.105862892300383	-0.224186431720896	0.822612240713401	0.899897066633076
ENSMUSG00000003184	54131	Irf3	302.231560334105	-0.134291275128486	0.116372875417408	-1.15397402226944	0.248510819410085	0.421509011253468
ENSMUSG00000003190	75736	Bcl2l12	44.2253301254994	0.139730778893413	0.21850981263135	0.639471414170102	0.522516304116484	0.687767292782461
ENSMUSG00000003198	224893	Zfp959	41.0298395560116	0.0565159653464991	0.231280110554106	0.244361545880866	0.806950821075806	0.889452671949216
ENSMUSG00000003199	68047	Mpnd	691.660362818878	-0.689629831280072	0.117131548224822	-5.8876523168327	3.91720099907572e-09	2.51069541681936e-07
ENSMUSG00000003200	20405	Sh3gl1	258.354853865051	0.374711169834404	0.109417549793734	3.42459843545008	0.000615708750050784	0.00435068906650671
ENSMUSG00000003206	50498	Ebi3	7.1117549467791	0.506620398522292	0.53947807686228	0.939093579981794	0.347682700173679	0.527038216623873
ENSMUSG00000003208	72886	Yju2	82.2482001318024	-0.351883676757486	0.152663327795681	-2.30496532362005	0.0211685155634966	0.0700996556830932
ENSMUSG00000003226	19386	Ranbp2	522.847621068944	0.359479551337463	0.135507338240693	2.65284194940751	0.00798172351001855	0.0327854458526623
ENSMUSG00000003227	13608	Edar	2.27066777980014	0.0998182281988207	1.01833339696434	0.0980211672291012	0.921915485287488	NA
ENSMUSG00000003228	14773	Grk5	81.2206336099673	0.457615783275948	0.179494057316689	2.54947595545493	0.0107884950233837	0.0416652085685689
ENSMUSG00000003233	13544	Dvl3	347.031367255986	-0.132063001225589	0.124083990687245	-1.06430330370705	0.28719132186443	0.464416242658776
ENSMUSG00000003234	27406	Abcf3	603.097802839203	-0.298086497131495	0.0862027295555341	-3.4579705151849	0.000544260945766849	0.00392040586056121
ENSMUSG00000003235	224045	Eif2b5	634.163494013271	-0.39885303360139	0.0841904668095755	-4.73750827992826	2.16362019572749e-06	4.35270812837141e-05
ENSMUSG00000003269	19158	Cyth2	278.47215532651	0.0623853423915642	0.111472159098221	0.559649538469913	0.575718508010005	0.729082852542656
ENSMUSG00000003271	54200	Sult2b1	0.685499529010084	-0.224203934277646	1.57953507331209	-0.141942992001766	0.887125035386436	NA
ENSMUSG00000003271	545963	Sult2b1	0.685499529010084	-0.224203934277646	1.57953507331209	-0.141942992001766	0.887125035386436	NA
ENSMUSG00000003273	12348	Car11	55.6601112525286	-0.595572036823594	0.246913237684102	-2.41207009559189	0.015862231617723	0.0558252182515213
ENSMUSG00000003279	224997	Dlgap1	2.08524158986437	-0.225254342228043	1.23504926644946	-0.18238490426832	0.855280671768974	NA
ENSMUSG00000003282	56711	Plag1	1.79202064150572	0.175369127870131	1.04998857401563	0.167020034512795	0.867354285081757	NA
ENSMUSG00000003283	15162	Hck	55.0724533009017	1.08292074784744	0.331076324498439	3.27090965954151	0.00107202150329507	0.00674148497493443
ENSMUSG00000003299	66163	Mrpl4	619.009758346702	-0.44450429208248	0.0918476590377856	-4.83958215962383	1.30112394362387e-06	2.85061256495825e-05
ENSMUSG00000003308	50868	Keap1	809.228264385067	-0.513131958974696	0.0914076453290696	-5.61366565266406	1.98084788696005e-08	9.43876905669826e-07
ENSMUSG00000003309	11768	Ap1m2	0.196953146018719	0.230171475247598	4.3205380027478	0.0532737994900664	0.957513755527007	NA
ENSMUSG00000003316	20340	Glg1	1043.85421246194	-0.137965029347477	0.101840734896467	-1.35471360735697	0.175508820801967	0.332595764688659
ENSMUSG00000003341	67331	Atp8b3	0.128135670577551	-0.547027414227082	4.32804458550702	-0.126391353744106	0.899422145980042	NA
ENSMUSG00000003344	208198	Btbd2	425.734687135414	-0.536218300681827	0.115441371379345	-4.64494049468446	3.40174490030059e-06	6.31079666861667e-05
ENSMUSG00000003345	103236	Csnk1g2	1459.69373455212	-0.256898451596778	0.0788440875167365	-3.25830965501688	0.00112078036094959	0.00699695730304053
ENSMUSG00000003346	216169	Abhd17a	880.369969084702	-0.361657198309975	0.104106002890638	-3.47393222550183	0.000512890565982024	0.0037489639581441
ENSMUSG00000003348	208228	Mob3a	16.9715332593113	0.974235044088293	0.405787171801956	2.40085224912868	0.0163569394272312	0.0571356738616513
ENSMUSG00000003352	12297	Cacnb3	65.8012391547469	0.343236927694131	0.184361079370646	1.8617645810376	0.062636281026915	0.158355301421179
ENSMUSG00000003354	105833	Ccdc65	0.950982386714703	0.764254271254624	1.21853668249528	0.627190204639231	0.530534563312098	NA
ENSMUSG00000003355	66120	Fkbp11	20.067049409543	0.990600591431201	0.325881474246068	3.03975730355023	0.00236768859627786	0.012600945105036
ENSMUSG00000003360	74351	Ddx23	872.828335341541	-0.30894358103074	0.0770813230389096	-4.00802125405644	6.12296110525429e-05	0.000667832758219632
ENSMUSG00000003363	18807	Pld3	602.332243549693	0.772852144498062	0.25056687544746	3.08441466222504	0.00203953111836592	0.0111859001738462
ENSMUSG00000003378	14809	Grik5	85.5153470700659	-0.00265858460431994	0.178657052150952	-0.0148809384925574	0.988127167119445	0.99359852463395
ENSMUSG00000003379	12518	Cd79a	4.22326338037782	-0.705796341632806	0.625702638327136	-1.12800601819389	0.259317377523806	0.434075452672394
ENSMUSG00000003380	14470	Rabac1	1854.52560615225	-0.286910463862101	0.121232944760805	-2.3666047577099	0.0179520929292632	0.0615371239169205
ENSMUSG00000003382	27049	Etv3	152.460460908327	0.537298404849771	0.138980573710184	3.86599645192282	0.000110636546044994	0.00107633554080916
ENSMUSG00000003402	19089	Prkcsh	429.59325537053	-0.193937826812917	0.131392886159979	-1.47601466472687	0.139939955483853	0.282851939158958
ENSMUSG00000003410	15571	Elavl3	1.3910438210483	0.0158988153188475	1.20304374687585	0.0132154922546538	0.989455869688212	NA
ENSMUSG00000003411	69908	Rab3b	2.14510965954126	-0.292397599216162	1.05268992700661	-0.277762322707516	0.781194815567905	NA
ENSMUSG00000003418	241230	St8sia6	13.0836714168443	-0.260613414279267	0.412217230251397	-0.632223485952606	0.527240852700041	0.691424576468704
ENSMUSG00000003420	14132	Fcgrt	964.531272044698	-0.110516069371079	0.126387674509514	-0.874421258243502	0.381888884608467	0.561605874609304
ENSMUSG00000003421	66394	Nosip	332.951330807437	-0.110357378953231	0.114142696351143	-0.966836972325703	0.333625538546653	0.513558267908955
ENSMUSG00000003423	68845	Pih1d1	304.604196983281	-0.314617908212022	0.131880822385478	-2.38562288679408	0.0170502249200286	0.0589341066077674
ENSMUSG00000003429	27207	Rps11	695.397296551744	0.0272051137987667	0.137319879924817	0.198114896500504	0.842955170108072	0.911797438798566
ENSMUSG00000003435	20924	Supt5	615.937858245651	-0.322463898737534	0.139456986505347	-2.31228213672299	0.0207621404388195	0.0690742953428348
ENSMUSG00000003436	13389	Dll3	0	NA	NA	NA	NA	NA
ENSMUSG00000003437	54624	Paf1	406.050752503711	-0.271142117652796	0.104561842487084	-2.59312681570516	0.00951076937958032	0.0377199744576221
ENSMUSG00000003438	66525	Timm50	633.82836701163	-0.408614955684389	0.0933700207927844	-4.37629714778822	1.20712426397391e-05	0.000181168401931952
ENSMUSG00000003444	67224	Med29	123.1833350001	-0.518678013723118	0.164222947729395	-3.15837719937771	0.00158650134120737	0.00915922921960198
ENSMUSG00000003452	12121	Bicd1	14.9984750849808	0.456501978061347	0.395020643726938	1.15564081348849	0.247828106638873	0.420875163643572
ENSMUSG00000003458	59287	Ncstn	470.909816985934	0.31869460213991	0.0920707770563489	3.46140884577158	0.000537356061360347	0.0038843642047207
ENSMUSG00000003464	19298	Pex19	1168.69223177919	-0.31882429297486	0.0730205348519563	-4.36622785112781	1.26410615690314e-05	0.000187652597896684
ENSMUSG00000003469	105653	Phyhip	8.02206838928093	-0.420019387649742	0.531035187353267	-0.790944550667462	0.428976349438174	0.60552778677488
ENSMUSG00000003476	12922	Crhr2	410.22500534826	-0.804765852726259	0.137398616455623	-5.85716125450346	4.70845901107775e-09	2.91496416958541e-07
ENSMUSG00000003477	21743	Inmt	110.047810518459	-0.675077328934435	0.312750356938389	-2.15851817258653	0.0308875670677275	0.0937467773732475
ENSMUSG00000003484	72054	Cyp4f18	44.1051742832161	0.990209542281669	0.377759531586169	2.62126951006079	0.00876029771460509	0.0352916701620669
ENSMUSG00000003500	23917	Impdh1	235.981476806347	0.127780272620495	0.109059901807951	1.17165218840476	0.241336725997627	0.413633331554658
ENSMUSG00000003505	26438	Psg18	0	NA	NA	NA	NA	NA
ENSMUSG00000003518	72349	Dusp3	960.441711548872	0.208880741995347	0.151362879244677	1.37999979280054	0.167586708626043	0.321483235420662
ENSMUSG00000003526	19125	Prodh	72.0567157067874	-0.755257770255151	0.197811430904255	-3.81806939468888	0.000134500096516686	0.00126847638630624
ENSMUSG00000003527	27886	Ess2	122.995669057034	-0.0499365033981089	0.166601807809674	-0.299735663463846	0.764378793082803	0.863641721350124
ENSMUSG00000003528	13358	Slc25a1	216.214791904381	0.173002827848356	0.432010326004019	0.400459936799628	0.688817785971743	0.812444100016034
ENSMUSG00000003531	13353	Dgcr6	380.860460090584	-0.50467398246204	0.120899803952432	-4.17431597044278	2.9888270394157e-05	0.00037809124715333
ENSMUSG00000003534	12305	Ddr1	259.180784761831	-0.0292616167965167	0.125358663615793	-0.233423171183441	0.815432822066734	0.895660890044267
ENSMUSG00000003541	15937	Ier3	78.9257359516714	0.589529963362608	0.230840502970324	2.55384109710763	0.0106541866667792	0.0412732938805023
ENSMUSG00000003545	14282	Fosb	75.6098927100227	2.26467801602598	0.721747808531838	3.1377691615479	0.00170238890017084	0.00964431340880148
ENSMUSG00000003546	74764	Klc4	252.491023582558	-0.189772064758134	0.122043803791239	-1.55495042651036	0.119957876307339	0.254028443944953
ENSMUSG00000003549	13870	Ercc1	181.573526944265	-0.390895630966399	0.121747764966745	-3.21070067342239	0.00132411780381003	0.00797986039287286
ENSMUSG00000003555	13074	Cyp17a1	0.165873701904186	-0.54702813385717	4.0126031003045	-0.136327496187115	0.891562387984484	NA
ENSMUSG00000003559	57344	As3mt	370.863859108474	-0.29968209324507	0.126062789731099	-2.37724465628845	0.0174425147464798	0.0599790576512659
ENSMUSG00000003573	26558	Homer3	44.0301484106246	0.606120798314238	0.21332212134655	2.84134057212741	0.00449243078067521	0.021032451641179
ENSMUSG00000003575	382056	Crtc1	167.039875155112	-0.269608195490221	0.128067572782462	-2.10520266475403	0.0352736704089418	0.103782694718946
ENSMUSG00000003581	71673	Rnf215	96.3250509265424	0.0400094308780226	0.14873646066268	0.268995448054666	0.787933185539392	0.878884009231461
ENSMUSG00000003585	67815	Sec14l2	9.35890086862481	0.758162611542827	0.427178582647635	1.77481419326729	0.0759285720086638	0.182900011924775
ENSMUSG00000003604	74268	Aven	236.380276259424	-0.173109092278193	0.117495694372651	-1.47332285836073	0.140663999931779	0.283863738101617
ENSMUSG00000003617	12870	Cp	147.7449834862	-0.185034287399289	0.183610332791969	-1.007755307589	0.313571946204715	0.493930212872963
ENSMUSG00000003623	74114	Crot	361.874300753784	0.0645192309833277	0.109277042129313	0.590418899762853	0.554909842757846	0.713009109230438
ENSMUSG00000003644	20111	Rps6ka1	146.088333235015	0.355396685699844	0.154288108078819	2.30346129799121	0.0212529022889186	0.0702868140449383
ENSMUSG00000003657	12308	Calb2	0	NA	NA	NA	NA	NA
ENSMUSG00000003660	320632	Snrnp200	582.11473271971	-0.181314366397829	0.130709408263145	-1.38715620250385	0.165394137297515	0.318671475283499
ENSMUSG00000003662	26371	Ciao1	407.352016174859	-0.0718693877207755	0.104400997161859	-0.688397521810564	0.4912024840012	0.661575063742531
ENSMUSG00000003665	15116	Has1	16.2076016783879	2.03773558190645	0.557819605116514	3.65303686571005	0.000259157006534067	0.00217213441784246
ENSMUSG00000003680	225895	Taf6l	154.965388203911	0.0820309511743555	0.156554823170836	0.52397587958591	0.600295316470739	0.748206104811848
ENSMUSG00000003680	100039957	Taf6l	154.965388203911	0.0820309511743555	0.156554823170836	0.52397587958591	0.600295316470739	0.748206104811848
ENSMUSG00000003721	72999	Insig2	576.924276366909	0.0358709920810107	0.13908503178209	0.25790691939598	0.79647874457066	0.883091282902305
ENSMUSG00000003731	16650	Kpna6	825.74424573769	-0.0945028799066137	0.11233286344811	-0.841275446968973	0.400193642335183	0.578982463514758
ENSMUSG00000003746	17155	Man1a	272.511629579875	0.968390077469551	0.129406580727049	7.4833140017209	7.24714454535563e-14	3.38420944140836e-11
ENSMUSG00000003752	233011	Itpkc	26.5427026056722	0.615544299887039	0.290401448870293	2.11963233062921	0.0340370637538366	0.101059280006161
ENSMUSG00000003762	76889	Coq8b	43.7967081048786	0.188643060766797	0.217399560724009	0.867725123908056	0.385544828620925	0.56504166777084
ENSMUSG00000003778	78656	Brd8	180.045360787926	0.383392320751836	0.121162457162219	3.16428314290895	0.00155465469763356	0.00903115763964954
ENSMUSG00000003779	19348	Kif20a	16.8005468126041	1.3925039847416	0.356918558470552	3.9014614166007	9.56137029713525e-05	0.000954618424779343
ENSMUSG00000003808	66590	Farsa	328.749761423992	-0.0968626411333035	0.112946430743463	-0.857598071012166	0.39111444058358	0.570192043475469
ENSMUSG00000003809	270076	Gcdh	356.222954972125	-0.385390071243321	0.143412222609266	-2.68728888118091	0.00720346231358389	0.0302127698838509
ENSMUSG00000003810	17776	Mast2	1156.95091554761	-0.583063158946654	0.145866786129588	-3.99723044853173	6.40879034458026e-05	0.000691844579866709
ENSMUSG00000003812	13423	Dnase2a	163.34173749974	0.265910276079775	0.229972213476103	1.15627132539387	0.247570193341086	0.420655706410928
ENSMUSG00000003812	100503676	Dnase2a	163.34173749974	0.265910276079775	0.229972213476103	1.15627132539387	0.247570193341086	0.420655706410928
ENSMUSG00000003813	19358	Rad23a	871.796379869747	-0.103691948987333	0.125667469579446	-0.825129600638453	0.409298016054956	0.587525625715985
ENSMUSG00000003814	12317	Calr	2629.86374000442	0.243650667516919	0.103808362614206	2.34711984064736	0.018919168566614	0.0641657794257602
ENSMUSG00000003824	71846	Syce2	13.8604294943685	0.832635338794744	0.394990601132919	2.10798772529413	0.0350320511950509	0.10320184656307
ENSMUSG00000003847	54446	Nfat5	303.067525814478	0.196982289817474	0.1198009344015	1.6442466897404	0.100125256220848	0.223711167146075
ENSMUSG00000003848	67619	Nob1	280.268081005102	-0.268351985158387	0.111728500881781	-2.40182212273955	0.0163136389152566	0.057008790769928
ENSMUSG00000003849	18104	Nqo1	142.176857762339	-0.198636540834606	0.197649514560327	-1.00499382088782	0.314899825246877	0.494591845457905
ENSMUSG00000003863	76787	Ppfia3	11.1568450405587	0.328466564742763	0.447408115098828	0.734154240072754	0.462854739065008	0.637312371969545
ENSMUSG00000003865	14936	Gys1	4739.31308724201	-0.590375103131046	0.107168656820127	-5.50884111687562	3.61203734879607e-08	1.54757786752588e-06
ENSMUSG00000003868	20174	Ruvbl2	326.383854259378	-0.280092733642775	0.134408063152831	-2.08389829503227	0.0371694194776412	0.107845032884516
ENSMUSG00000003872	22342	Lin7b	1.5115930867113	0.226968047706574	1.24469453626482	0.18234839239166	0.855309323602705	NA
ENSMUSG00000003873	12028	Bax	120.923279675311	0.451877637299504	0.144400989089363	3.12932508391517	0.00175208351957309	0.00986769574221316
ENSMUSG00000003882	16197	Il7r	44.2889824854944	1.71940954624588	0.712592631834584	2.41289268150195	0.0158264788213853	0.0557326089279863
ENSMUSG00000003923	21780	Tfam	461.888522298611	-0.052538478852295	0.101573383485609	-0.517246517240797	0.604984083493671	0.751642710803539
ENSMUSG00000003929	224694	Zfp81	44.5803390072178	0.0784864692597054	0.243665507860557	0.322107424841686	0.747371313597976	0.852621802456815
ENSMUSG00000003934	13643	Efnb3	13.7452275800031	0.0632882846230691	0.484393814842156	0.130654609294902	0.896048540977194	0.942650447588263
ENSMUSG00000003948	67468	Mmd	168.865798542427	0.310186892309104	0.221290591281545	1.40171749062054	0.16099962551598	0.312775214481537
ENSMUSG00000003949	217082	Hlf	51.2955519893845	-0.564323002200254	0.292026529982999	-1.93243744749187	0.0533055357479589	0.140452309570311
ENSMUSG00000003955	70186	Fam162a	712.047823801416	-0.401363284513831	0.107710560837457	-3.72631319893987	0.000194300948676599	0.00171842787076317
ENSMUSG00000003970	26961	Rpl8	4529.0664872368	-0.175195696419121	0.10898134036149	-1.60757516688636	0.107928254617604	0.235787745240782
ENSMUSG00000003974	108069	Grm3	0.0701865425158341	-1.26836817847825	4.32804458550702	-0.293058020410773	0.769477803563898	NA
ENSMUSG00000003992	66970	Ssbp2	127.742628603634	0.184915703961105	0.160855426955592	1.14957702988881	0.250318123418111	0.423519607572009
ENSMUSG00000004018	67030	Fancl	31.9105399301377	0.117843110614913	0.248712250925305	0.473813051735456	0.635633226507037	0.774049684691306
ENSMUSG00000004031	240843	Brinp2	4.38340213612731	-1.12580593930932	0.795898177105072	-1.41451001107231	0.157212210088033	0.307561036920056
ENSMUSG00000004032	14866	Gstm5	391.328522432476	-0.551824947811612	0.145951371283672	-3.78088224151782	0.000156273583741786	0.00143652162692674
ENSMUSG00000004035	68312	Gstm7	36.6497972584819	-0.648627835639058	0.257592334818558	-2.51804012761458	0.0118009875546702	0.0444925814517945
ENSMUSG00000004038	14864	Gstm3	0.445564256014112	-1.97060115324408	2.20230091330488	-0.894791961143446	0.370898308409417	NA
ENSMUSG00000004040	20848	Stat3	720.135024422779	0.327823627271734	0.146758411510149	2.23376380200915	0.0254986184626041	0.0805615498824125
ENSMUSG00000004043	20850	Stat5a	207.246297829252	0.131351311853161	0.119567162342866	1.09855673814942	0.271961456576645	0.447827110465158
ENSMUSG00000004044	19285	Cavin1	2876.54851079355	0.0395325963842679	0.116279747826757	0.339978346385536	0.733872834769038	0.844379979687796
ENSMUSG00000004054	26403	Map3k11	398.842389862381	-0.128626905059149	0.105020615233735	-1.22477767601033	0.220658998304916	0.389381415276997
ENSMUSG00000004056	11652	Akt2	2604.70440725098	-0.0580124634143871	0.096416002019743	-0.601689161540923	0.547381065942218	0.707113194890896
ENSMUSG00000004069	83945	Dnaja3	1114.04790673745	-0.287974963347108	0.0823281199667647	-3.49789310703757	0.000468949045209793	0.00349169686618995
ENSMUSG00000004070	15369	Hmox2	337.144781410418	-0.119212167085477	0.104012965483657	-1.14612795175239	0.251742213574308	0.425136881448491
ENSMUSG00000004071	66626	Cdip1	839.712463412142	-0.35170777867679	0.107410954224935	-3.27441257006488	0.00105881898348943	0.00668417824107812
ENSMUSG00000004085	65964	Map3k20	2297.66507431394	-0.512333184103522	0.10519963315824	-4.87010428385122	1.11539365978425e-06	2.51101845392753e-05
ENSMUSG00000004096	66070	Cwc15	680.693715553013	0.00312536453305127	0.128357601320168	0.0243488854645666	0.980574319712122	0.989168416329769
ENSMUSG00000004098	53867	Col5a3	1545.98836056317	0.202544039343368	0.112597002017705	1.79884042837588	0.0720439261267313	0.175717941891553
ENSMUSG00000004099	13433	Dnmt1	155.148570725025	0.545841267466416	0.150155917713208	3.63516320754638	0.000277804707234067	0.00228852829386774
ENSMUSG00000004100	235036	Ppan	123.191327099198	-0.10242209775352	0.176899580112975	-0.578984402835264	0.562599697421299	0.719493236703697
ENSMUSG00000004105	26360	Angptl2	1095.3048543672	0.371230495659081	0.126200428655096	2.94159456996497	0.00326527122423943	0.0163004254395141
ENSMUSG00000004110	12290	Cacna1e	0.722389886957435	0.0292323041312346	1.53780232411916	0.0190091429000659	0.984833811748845	NA
ENSMUSG00000004113	12287	Cacna1b	1.6726392425781	1.57027449946478	1.14615464221827	1.37003720233219	0.170675288882509	NA
ENSMUSG00000004127	108943	Trmt10a	22.4020441048724	1.26471941471577	0.357206796737332	3.54058048801845	0.000399247837869968	0.00306264858877606
ENSMUSG00000004151	14009	Etv1	43.0400837814565	0.366140277901024	0.214760196276895	1.70487960175335	0.0882168814529948	0.204803510009623
ENSMUSG00000004187	16581	Kifc2	49.9830258045488	-0.295008628118372	0.232976220214928	-1.26626068465793	0.205419767606041	0.371240091699289
ENSMUSG00000004207	19156	Psap	14545.4286428672	0.303100333640019	0.134297827624736	2.25692655645155	0.0240126643277741	0.0769988200457407
ENSMUSG00000004221	16151	Ikbkg	204.240274998475	0.0956484985985608	0.128567116737038	0.743957716607998	0.456902056127307	0.631723814004289
ENSMUSG00000004231	18504	Pax2	0.109313131457708	0	4.32804458550702	0	1	NA
ENSMUSG00000004233	70560	Wars2	56.8356761886765	-0.0359722046696866	0.188301835666734	-0.191034806125586	0.848498323947316	0.915188847528208
ENSMUSG00000004263	13498	Atn1	140.005368902695	-0.484014267387846	0.158422529619829	-3.05521107729657	0.00224902178375815	0.012083430237747
ENSMUSG00000004264	12034	Phb2	1167.75519328718	-0.29878150896648	0.0708862950779078	-4.21494040051189	2.49844159791517e-05	0.000327988188564864
ENSMUSG00000004266	15170	Ptpn6	130.833574774883	1.1357821506972	0.295589732681076	3.84242761206675	0.000121823350119197	0.0011671048266988
ENSMUSG00000004267	13807	Eno2	26.5216451570214	0.698660984365228	0.374606895225184	1.86505105290507	0.0621742484961835	0.157473410417112
ENSMUSG00000004268	14791	Emg1	584.528793429787	-0.1258075048043	0.118289360851779	-1.0635572286331	0.287529326995227	0.464793648636768
ENSMUSG00000004270	14792	Lpcat3	226.593921021088	0.1326043074523	0.104860291579945	1.26458076221544	0.20602165286088	0.37196835741517
ENSMUSG00000004285	66144	Atp6v1f	788.763047793359	-0.191638146959176	0.105833023377117	-1.81075944770385	0.0701780961389247	0.172220841335523
ENSMUSG00000004296	16160	Il12b	0.917516773187019	2.9454391471883	1.56184677926027	1.88586946318981	0.0593125474457791	NA
ENSMUSG00000004317	12728	Clcn5	106.834904270484	0.794230181249143	0.201774525233572	3.93622624228578	8.27729437779588e-05	0.000848176171226933
ENSMUSG00000004319	12725	Clcn3	424.634287763147	0.113485661637143	0.151929626771869	0.746962024777091	0.455086484097952	0.630119747212548
ENSMUSG00000004328	53417	Hif3a	6.17810834670347	-1.26862253978528	0.64326031350259	-1.9721759809455	0.0485895206028881	0.131220608845605
ENSMUSG00000004341	75512	Gpx6	0	NA	NA	NA	NA	NA
ENSMUSG00000004344	14780	Gpx5	0	NA	NA	NA	NA	NA
ENSMUSG00000004347	18575	Pde1c	11.6798049791843	0.740069630450588	0.465564071028693	1.58961929518177	0.111920645083577	0.242153961245166
ENSMUSG00000004356	70683	Utp20	133.956151511059	0.12646119254119	0.162612559981015	0.777684039633559	0.436755303535706	0.612942527991377
ENSMUSG00000004359	20728	Spic	3.71450753338165	1.69691783868269	0.701161372735887	2.42015305558181	0.0155139756797383	0.0548594587861626
ENSMUSG00000004360	212448	9330159F19Rik	232.884296864874	-0.35253495209395	0.148811036172182	-2.36901080163201	0.0178357325527517	0.0611670282841206
ENSMUSG00000004364	26554	Cul3	2259.90912210503	-0.250165472618227	0.101067725426877	-2.4752261076581	0.0133151847946848	0.0486635465752078
ENSMUSG00000004366	20604	Sst	0	NA	NA	NA	NA	NA
ENSMUSG00000004371	16156	Il11	2.13634597542951	0.8403962203095	0.888600592242838	0.945752487277024	0.344274844513367	NA
ENSMUSG00000004383	16795	Large1	311.061356442094	-0.195893429254148	0.155072471507603	-1.26323793868562	0.206503682236311	0.372553664100084
ENSMUSG00000004393	52513	Ddx56	278.834101653992	-0.318768322666804	0.119487051890405	-2.66780640766987	0.00763482363172731	0.0316502372497997
ENSMUSG00000004394	103694	Tmed4	670.190181047567	0.0782014655835209	0.121791489874312	0.642093020326987	0.520812787486151	0.686243485865337
ENSMUSG00000004415	140709	Col26a1	42.7859611337749	0.521207891294642	0.222495799746054	2.34255159823028	0.0191523855085444	0.0648356646130177
ENSMUSG00000004446	12122	Bid	19.9182817464116	1.30540993993447	0.351308075384774	3.71585520345556	0.000202517540107844	0.00177381922589636
ENSMUSG00000004451	64143	Ralb	222.404747350293	0.400192347146909	0.130770893818382	3.06025550075926	0.00221148243383506	0.0119446361198282
ENSMUSG00000004455	19047	Ppp1cc	965.545679249763	0.115593022885312	0.114939815941953	1.00568303453426	0.314568066753272	0.494260765527348
ENSMUSG00000004455	434233	Ppp1cc	965.545679249763	0.115593022885312	0.114939815941953	1.00568303453426	0.314568066753272	0.494260765527348
ENSMUSG00000004460	67838	Dnajb11	507.788674231576	0.302215220584636	0.117496273431995	2.57212600669887	0.0101076096276227	0.039606514445904
ENSMUSG00000004462	70573	Tbccd1	90.5034011161948	0.163775424676412	0.18926685465222	0.865314875007307	0.386865988639737	0.566064254102763
ENSMUSG00000004473	20256	Clec11a	111.678273673923	0.471777161625231	0.25836001311461	1.82604558630343	0.0678433954669765	0.168081862287879
ENSMUSG00000004500	243834	Zfp324	35.2198743908785	0.323108089027102	0.247242622986585	1.30684622709505	0.191264941717572	0.353185735108104
ENSMUSG00000004508	14389	Gab2	131.873127225379	0.523900692446638	0.167092508913676	3.13539305773006	0.00171623990210335	0.00971604605472019
ENSMUSG00000004530	23790	Coro1c	211.373481927804	0.781124666399193	0.175349177026825	4.45468110910892	8.4017980212934e-06	0.000135023585899724
ENSMUSG00000004535	52440	Tax1bp1	805.799625377157	0.0145156708068774	0.0777867033594678	0.186608638494392	0.851967493189669	0.917069077032084
ENSMUSG00000004540	26437	Psg17	0.577338228863613	-2.8771910133835	2.06205946625183	-1.39529972848617	0.162925473923703	NA
ENSMUSG00000004542	26439	Psg19	0.0650779221030176	0	4.32804458550702	0	1	NA
ENSMUSG00000004552	13034	Ctse	1.82703730519063	1.35872841493371	0.958731390017354	1.41721490407142	0.156420105579724	NA
ENSMUSG00000004558	29811	Ndrg2	18498.8772769601	-0.521152389105119	0.112749918180033	-4.62219749262231	3.79696270094666e-06	6.91064124546461e-05
ENSMUSG00000004561	52535	Mettl17	145.263857251065	-0.113188371654767	0.127559788987425	-0.887335833284625	0.374898118814971	0.555414689440888
ENSMUSG00000004562	268739	Arhgef40	268.637810252523	0.229096934182917	0.137561328624453	1.66541670158158	0.0958296496018353	0.217250164295039
ENSMUSG00000004565	50767	Pnpla6	129.672262805062	-0.145503406077424	0.137506072458189	-1.05815985778859	0.289982568785431	0.467428104049561
ENSMUSG00000004567	94178	Mcoln1	358.634734187579	-0.0622942538145369	0.09583440431024	-0.650019732087808	0.515679475855547	0.681946229036883
ENSMUSG00000004568	102098	Arhgef18	142.264901423736	-0.122567693161457	0.158525007605685	-0.773175759539037	0.439418370019141	0.615411640067938
ENSMUSG00000004591	109333	Pkn2	387.919861634171	0.131732066892782	0.140347119910583	0.938616103962167	0.347927881581604	0.527165411752084
ENSMUSG00000004609	12489	Cd33	68.874623386045	1.10892945394528	0.1838054020701	6.03317117699486	1.6077295117365e-09	1.15756524845028e-07
ENSMUSG00000004610	110826	Etfb	88.174911909454	-1.03788939214763	0.250222737266164	-4.14786203479031	3.35594523861659e-05	0.000416157579514033
ENSMUSG00000004612	72310	Nkg7	5.03350711746527	1.10212673752957	0.652204751297025	1.6898477592164	0.0910570841213522	0.20943385630163
ENSMUSG00000004626	20911	Stxbp2	82.2844985436453	0.678277765334471	0.234513746682469	2.89227294744839	0.00382465516217337	0.0184886613340909
ENSMUSG00000004630	18545	Pcp2	0.196777526811463	-0.54702859044376	3.79890610776467	-0.143996343927973	0.885503356672156	NA
ENSMUSG00000004631	20392	Sgce	159.432694309798	0.55430332095707	0.145827489502767	3.80108937517267	0.000144061323260891	0.00134161724636809
ENSMUSG00000004633	69993	Chn2	17.5444391046181	0.334403008624644	0.314096395846214	1.06465089395159	0.287033939666485	0.464253608105792
ENSMUSG00000004637	80707	Wwox	100.264572552792	-0.263194017751022	0.154651482047342	-1.70185254138369	0.0887830142299701	0.205737924936145
ENSMUSG00000004642	20492	Slbp	89.8821515666536	0.546721333477716	0.198693096895681	2.75158695505541	0.00593072721973589	0.0260079972308461
ENSMUSG00000004651	22173	Tyr	0	NA	NA	NA	NA	NA
ENSMUSG00000004654	14602	Ghrhr	0	NA	NA	NA	NA	NA
ENSMUSG00000004655	11826	Aqp1	3444.50729693104	-0.782388003031953	0.148285807016852	-5.27621637412028	1.31878365847174e-07	4.41684428566846e-06
ENSMUSG00000004661	56380	Arid3b	33.4703969141486	0.0735064036133458	0.26869799328217	0.273565138002925	0.784418828110769	0.876616145898721
ENSMUSG00000004665	12798	Cnn2	315.992550273971	0.436583294741237	0.134734178467984	3.24033069934797	0.00119391146607054	0.0073524073102701
ENSMUSG00000004667	66420	Polr2e	551.31766436999	-0.188904184269286	0.0917776958268025	-2.05827987472877	0.0395632749428683	0.113164537218453
ENSMUSG00000004668	268379	Abca13	0.0402476891642483	0.174313350024088	4.32804458550702	0.0402753129225604	0.967873635239457	NA
ENSMUSG00000004677	17925	Myo9b	236.246247865965	0.385234270031722	0.158243945181475	2.43443292310447	0.0149151440100763	0.0530864794644354
ENSMUSG00000004698	79221	Hdac9	83.8162061776086	0.551153804183443	0.246647238250352	2.23458331864236	0.0254447169950459	0.0804497163776048
ENSMUSG00000004707	17085	Ly9	58.5729536742591	1.29794414818849	0.568732785118829	2.2821686777162	0.0224793835717971	0.0733632278549225
ENSMUSG00000004709	18106	Cd244a	6.78551029373924	1.2537293453852	0.508002094672885	2.46796097601232	0.0135885132653457	0.0493534801797355
ENSMUSG00000004730	13733	Adgre1	296.227839428482	1.51964980791619	0.265736437856124	5.7186354275546	1.07382912936851e-08	5.86978705364512e-07
ENSMUSG00000004748	67900	Mtfp1	769.673884617729	-0.810617935749735	0.116467506824944	-6.96003510204896	3.40187965021608e-12	8.60237960826639e-10
ENSMUSG00000004768	19335	Rab23	76.820182706822	0.505531966858	0.176327537936472	2.86700519257596	0.00414376213708173	0.0197163459587959
ENSMUSG00000004771	53869	Rab11a	493.236003750249	0.110212776296723	0.146735243423442	0.751099556762076	0.4525927424744	0.627464227924472
ENSMUSG00000004788	217715	Eif2b2	448.237342605236	-0.323933591786492	0.0959792937919848	-3.37503620821123	0.000738059795453108	0.00501157012749713
ENSMUSG00000004789	78920	Dlst	3648.01468820807	-0.368999825586606	0.0743666965771296	-4.96189615204834	6.98083181429765e-07	1.73396223666992e-05
ENSMUSG00000004791	18654	Pgf	18.9722002252441	0.258230883770061	0.321679205599471	0.802759019778197	0.422114032596705	0.599498761623266
ENSMUSG00000004798	29869	Ulk2	1042.31403666056	-0.144936941875093	0.117658948811505	-1.23183951020409	0.218009041014376	0.386080806841366
ENSMUSG00000004814	56221	Ccl24	31.4352885579989	0.25995115590129	0.453001854997595	0.573841261428544	0.566075224331188	0.721926601125082
ENSMUSG00000004815	110524	Dgkq	27.7194916807982	0.424127625822953	0.392218491918328	1.08135550608172	0.279539005634343	0.456202823170953
ENSMUSG00000004821	67366	Tmed11	0	NA	NA	NA	NA	NA
ENSMUSG00000004837	71520	Grap	76.6397580040698	-0.0826933221330169	0.159136116695852	-0.519638934579911	0.603315255905801	0.750482117552661
ENSMUSG00000004842	18736	Pou1f1	0.358016115935808	-1.77645439507712	2.74670169980986	-0.646759127574754	0.517787848889052	NA
ENSMUSG00000004843	68942	Chmp2b	451.551087383646	0.028212115362045	0.0935797625756898	0.301476671724042	0.763051036280138	0.862651659273444
ENSMUSG00000004846	26433	Plod3	346.689062307617	0.205041949776883	0.104845982014407	1.95564909438979	0.0505065052898959	0.135147073093985
ENSMUSG00000004849	11769	Ap1s1	349.906079866171	0.337773653447897	0.142051691359056	2.37782211683863	0.0174152248555348	0.0598978188213089
ENSMUSG00000004864	26415	Mapk13	0.872653999224319	0.370869882714282	1.37120121001981	0.270470795973791	0.78679808137212	NA
ENSMUSG00000004865	20815	Srpk1	258.509830088287	-0.195323905832107	0.103951477158155	-1.87899115214049	0.0602457013500459	0.15375636209637
ENSMUSG00000004872	18505	Pax3	13.0841531137764	-0.271976579449721	0.417358182888717	-0.651662266610548	0.514619069627294	0.681102443435784
ENSMUSG00000004880	98386	Lbr	159.182696127174	0.412788823194793	0.189902889767086	2.17368373752013	0.0297288948072234	0.0909053426995808
ENSMUSG00000004885	12904	Crabp2	4.65793830562401	1.5544254479458	0.842118515006009	1.84585117207013	0.0649138180823339	0.162498306438607
ENSMUSG00000004891	18008	Nes	992.411687129887	0.30128653184325	0.218629903324461	1.37806643675875	0.168182776936594	0.322324027468537
ENSMUSG00000004892	12032	Bcan	1.81732174905771	2.48746637807355	1.25677181979246	1.97925059975033	0.0477877985011152	NA
ENSMUSG00000004894	73940	Hapln2	1.59681537031893	-0.963651801191287	1.3151369312206	-0.732738757702521	0.463717780217289	NA
ENSMUSG00000004895	94315	Prcc	666.685942220228	-0.437198457136986	0.0859747952200674	-5.08519335251571	3.67251741970854e-07	1.02780179294035e-05
ENSMUSG00000004896	229503	Rrnad1	114.367393492653	0.323740831449348	0.152855447837737	2.11795415884041	0.0341789501781424	0.101353042939487
ENSMUSG00000004897	15191	Hdgf	3245.39098466083	-0.210565747802455	0.0973359151634906	-2.16328934133693	0.0305189323682506	0.092964301093715
ENSMUSG00000004902	71803	Slc25a18	4.09436602648306	-0.267786674793411	0.626340654042956	-0.42754158310638	0.66898490427387	0.797453816311877
ENSMUSG00000004929	50492	Thop1	461.644165694354	-0.184663487754816	0.119473898650316	-1.54563875324183	0.122191836458629	0.257325521850256
ENSMUSG00000004931	57267	Apba3	715.821193564395	-0.564330489981491	0.110750316768308	-5.09552032399222	3.47784705607482e-07	9.78346510920599e-06
ENSMUSG00000004933	17179	Matk	41.9184954153682	0.648248720376455	0.398990401220412	1.6247225958159	0.104221680476853	0.229754403252454
ENSMUSG00000004934	59004	Pias4	331.208018213912	-0.257722561542474	0.108143270620798	-2.38315856421777	0.0171647991029254	0.0592054171982377
ENSMUSG00000004936	26395	Map2k1	598.487692730279	0.32309780362997	0.108183844672587	2.98656240779583	0.00282133246205544	0.0145051455677364
ENSMUSG00000004937	52551	Sgta	1211.65397079959	-0.432402175250967	0.07070068998605	-6.11595410647738	9.59809471278137e-10	7.36484788665252e-08
ENSMUSG00000004939	69564	Nmrk2	2312.23188191089	-0.500157861011051	0.362094732133867	-1.38129007860336	0.167189787527636	0.32098553827695
ENSMUSG00000004945	70544	Tmem242	903.215278724203	-0.42898187484237	0.0888484594692026	-4.82824212603334	1.37743554717049e-06	2.97395067146031e-05
ENSMUSG00000004947	74198	Dtx2	130.174483998632	-0.0221410792428295	0.131321428653538	-0.168602180693935	0.866109565175273	0.925450754002658
ENSMUSG00000004948	22788	Zp3	0.042418234944148	0	4.32804458550702	0	1	NA
ENSMUSG00000004951	15507	Hspb1	2867.35849367441	-0.22351128272831	0.192213075012884	-1.1628307944885	0.24489816034683	0.417713482426156
ENSMUSG00000004952	54153	Rasa4	475.214805095876	-0.119344732861493	0.136828993859423	-0.872218157096931	0.383089375948874	0.562755056669818
ENSMUSG00000004961	53420	Syt5	0.525215250273663	0.0206891586876923	1.96250809213881	0.0105422029955273	0.991588694795976	NA
ENSMUSG00000004980	53379	Hnrnpa2b1	4446.79465886396	0.000738131208596356	0.0637684550865873	0.0115751778460697	0.99076455054342	0.995027624398783
ENSMUSG00000004988	108017	Fxyd4	1.47525036875178	0.877874258053707	1.14043587783091	0.769770817560922	0.441435853299008	NA
ENSMUSG00000004994	67736	Ccdc130	65.2895132706691	-0.034316480642121	0.168601977806404	-0.203535457226514	0.838716534776337	0.909229019446128
ENSMUSG00000004996	67873	Mri1	215.504256223846	-0.292795569754316	0.12949636455855	-2.261033124385	0.0237572059537733	0.0763723632491519
ENSMUSG00000005034	18749	Prkacb	480.345480486308	0.410195422116986	0.101017636084639	4.0606317670441	4.89401072745225e-05	0.000561317272487576
ENSMUSG00000005043	27029	Sgsh	52.6481012768054	0.258816240512324	0.246573293674431	1.04965236362564	0.293877972710531	0.472285308356039
ENSMUSG00000005045	269610	Chd5	3.99804889098586	-0.196633353476901	0.850912542648243	-0.23108526860461	0.817248559372243	0.896514947717317
ENSMUSG00000005054	13014	Cstb	247.978360829696	0.921620876898807	0.224043162868455	4.11358626212544	3.89559374379727e-05	0.000465784822237397
ENSMUSG00000005057	23921	Sh2b2	74.2819144152675	0.266208718253049	0.282121386297692	0.943596377951112	0.345375943868203	0.524758243616427
ENSMUSG00000005069	19305	Pex5	374.819113434396	0.055635029231892	0.0849148236566645	0.655186301238059	0.512347813047659	0.678879233588775
ENSMUSG00000005078	104771	Jkamp	161.396001112605	0.0370335638147981	0.129726896513803	0.285473288963307	0.775281565679302	0.870394416091669
ENSMUSG00000005087	12505	Cd44	373.794347504958	1.22586965721597	0.197057595721208	6.22086985649767	4.94406139779654e-10	4.34439459599928e-08
ENSMUSG00000005089	20511	Slc1a2	1.40720715836751	-0.0123548189525882	1.03275575108416	-0.0119629631107049	0.990455164097257	NA
ENSMUSG00000005102	27103	Eif2ak4	59.6942938077373	0.0907631294200305	0.206579829846823	0.439361042592254	0.660399949880159	0.791608124740838
ENSMUSG00000005103	22388	Wdr1	878.833262366934	0.433014399183419	0.0959730506795651	4.51183322940487	6.42697134540911e-06	0.000107735815045504
ENSMUSG00000005107	117591	Slc2a9	12.7307084159119	0.749309746515902	0.374635146292945	2.00010531294355	0.0454888931986862	0.124827144130176
ENSMUSG00000005124	22402	Ccn4	52.9920009294225	1.30187231215823	0.309661198799906	4.20418288504869	2.62027014988675e-05	0.000340697655765704
ENSMUSG00000005125	17988	Ndrg1	230.754256820859	-0.0695264493480505	0.145320775104809	-0.478434341531047	0.632341096036451	0.771763828112167
ENSMUSG00000005131	75311	4930550C14Rik	3.37537163771357	-0.247938515089045	0.720068940770969	-0.344326079144005	0.730601073717317	0.842275795220134
ENSMUSG00000005142	17159	Man2b1	473.602531911841	0.588355619911655	0.218656967863342	2.69077004799303	0.00712873132323119	0.0299670742661756
ENSMUSG00000005148	12224	Klf5	120.21321602916	0.560311785819815	0.159702418681327	3.50847401339533	0.000450685261436187	0.00337889904262066
ENSMUSG00000005150	67836	Wdr83	275.761016772872	-0.540867090373398	0.140336182530358	-3.85408153920958	0.000116164879503461	0.00112330648425203
ENSMUSG00000005161	21672	Prdx2	1435.52089939449	-0.376583393065621	0.107094005683388	-3.51638161877097	0.000437471697344183	0.00330153129286452
ENSMUSG00000005198	20020	Polr2a	634.249113441491	0.00891094367692679	0.133760736927614	0.0666185300829273	0.946885393642623	0.970093078022631
ENSMUSG00000005202	20415	Shbg	3.08294255430184	-1.08171149458301	0.760429851703524	-1.42250004015459	0.154881139864647	0.304801607459096
ENSMUSG00000005204	80886	Senp3	331.058151418207	0.0746126027061502	0.0883865830544146	0.844162090305216	0.398578835347982	0.577566493920331
ENSMUSG00000005220	53419	Corin	2.25593445002446	-0.107009220520031	1.01343560732892	-0.105590547387685	0.915907224914143	NA
ENSMUSG00000005225	231999	Plekha8	51.4687488581353	-0.0119064501598599	0.192026303003481	-0.0620042669865076	0.950559433978056	0.972105170337904
ENSMUSG00000005232	14378	G6pc2	0	NA	NA	NA	NA	NA
ENSMUSG00000005233	66442	Spc25	18.5582294550238	1.13358381179629	0.427761220260529	2.65003875551383	0.00804825380268547	0.0329923903062682
ENSMUSG00000005237	327954	Dnah2	4.01034486105003	0.103760209525805	0.700710026555277	0.148078671052982	0.882280681895978	0.935153985004368
ENSMUSG00000005251	72388	Ripk4	0.161354864494898	0	4.32804458550702	0	1	NA
ENSMUSG00000005262	22230	Ufd1	455.031779227071	-0.0979634226873617	0.0967031929734001	-1.01303193488459	0.311044907460163	0.490895902619631
ENSMUSG00000005267	170740	Zfp287	17.0926646488598	0.298084446498982	0.309424059088501	0.963352518149612	0.335370645927455	0.515062754842917
ENSMUSG00000005268	19116	Prlr	7.08396924405353	1.21105687145968	0.582358564024957	2.07957252845994	0.0375647589146398	0.108703686207662
ENSMUSG00000005299	56384	Letm1	999.03097808608	-0.465151036578108	0.0996613360627468	-4.66731688490759	3.05158504017984e-06	5.79943091822085e-05
ENSMUSG00000005312	56085	Ubqln1	809.518076974495	0.0593197899980194	0.0938783387102876	0.631879417690621	0.527465673625666	0.691608421158274
ENSMUSG00000005320	14186	Fgfr4	89.3767900936962	0.542545522404316	0.221348324850494	2.45109387103232	0.0142422805669432	0.0511764839137899
ENSMUSG00000005338	94332	Cadm3	132.411674461906	-0.492138804304644	0.218655068077532	-2.2507541610247	0.0244011122924212	0.0779995656771624
ENSMUSG00000005339	14125	Fcer1a	3.87205021795321	0.0447297040239763	0.639924054698948	0.0698984570052135	0.944274481258828	0.969002377450808
ENSMUSG00000005354	56551	Txn2	2282.08278078721	-0.476910075023941	0.0944880693381951	-5.04730468475302	4.4808646444808e-07	1.22262523788638e-05
ENSMUSG00000005355	12365	Casp14	0	NA	NA	NA	NA	NA
ENSMUSG00000005357	20513	Slc1a6	0.841137995285672	-0.478369145433906	1.3459946913764	-0.3554019555194	0.722288484074514	NA
ENSMUSG00000005360	20512	Slc1a3	42.7503548665481	0.257052719079892	0.393343461183868	0.653507035063518	0.51342945552284	0.679913386895584
ENSMUSG00000005362	58799	Crbn	173.684907318939	0.0142008443710029	0.140687256675438	0.100939095029509	0.919598808233074	0.955696954522707
ENSMUSG00000005364	16192	Il5ra	1.01725709306232	1.19095630208617	1.4144266332785	0.842006417346412	0.399784361382083	NA
ENSMUSG00000005370	17688	Msh6	73.5947403992122	0.464346529348334	0.210093688214265	2.21018790852379	0.0270921237959778	0.084438152425908
ENSMUSG00000005371	225055	Fbxo11	387.183648345764	0.259445756023745	0.112918184906375	2.29764369874403	0.0215820763779748	0.0711307635252309
ENSMUSG00000005373	58805	Mlxipl	862.001507251913	-0.725988512143084	0.119577645964998	-6.07127282264439	1.26900386109992e-09	9.42754504809867e-08
ENSMUSG00000005374	27368	Tbl2	136.132998715863	0.131878292354375	0.123813654158581	1.06513528940406	0.286814711811208	0.464076016018303
ENSMUSG00000005378	66138	Bud23	228.608940934548	-0.161757822008793	0.120785481762346	-1.33921577037762	0.180500439893967	0.339052889280196
ENSMUSG00000005397	18073	Nid1	1542.24106109507	0.516043747288936	0.124868804164685	4.13268750943066	3.58546048081472e-05	0.000438628488760746
ENSMUSG00000005410	17218	Mcm5	54.9041984824543	0.869216844986184	0.386920236535009	2.2465013791222	0.0246719113045512	0.0786553452280859
ENSMUSG00000005413	15368	Hmox1	180.005576828036	1.08599649974336	0.240444565760581	4.51661902321686	6.28348055630392e-06	0.00010554697452439
ENSMUSG00000005417	26936	Mprip	1109.59135555545	-0.328241276680917	0.108115084972047	-3.03603587571322	0.00239710840612768	0.0127285054547598
ENSMUSG00000005442	71722	Cic	426.544871589815	-0.088223350593633	0.15252900027941	-0.5784037817859	0.562991541309942	0.719752864011886
ENSMUSG00000005447	18476	Pafah1b3	20.3155373766351	1.03147524020389	0.31008253123807	3.32645388337584	0.000879585732874862	0.00575959503930559
ENSMUSG00000005465	50931	Il27ra	14.8240641284143	0.493955376646914	0.381170512710532	1.29589084196036	0.195013094820866	0.358478660868459
ENSMUSG00000005469	18747	Prkaca	1469.9037839007	-0.0141353221484128	0.0733394798059235	-0.192738238474267	0.847163974915405	0.914563127671213
ENSMUSG00000005470	66929	Asf1b	18.0456467992587	0.886482387443479	0.42029046063888	2.10921367593246	0.0349261419806556	0.102982656419238
ENSMUSG00000005474	59310	Myl10	50.8629052041761	-1.09309820300458	0.318115800616396	-3.43616444353452	0.000590012733283281	0.00419815764596515
ENSMUSG00000005481	68278	Ddx39a	199.932157427257	0.331815671307661	0.131629732748473	2.52082614147456	0.0117079683618488	0.0442337112589128
ENSMUSG00000005483	81489	Dnajb1	167.329369315903	0.0824561708714895	0.20875139147441	0.394996987991802	0.692845110852853	0.815135365086311
ENSMUSG00000005493	55993	Msh4	0.153838487674782	1.52471968965967	4.28592136410077	0.355750738319851	0.722027243753493	NA
ENSMUSG00000005501	227334	Usp40	134.613700439086	-0.0758393071018158	0.145048543679032	-0.522854660779189	0.601075397992803	0.74866455607334
ENSMUSG00000005503	14028	Evx1	0	NA	NA	NA	NA	NA
ENSMUSG00000005505	67136	Kbtbd4	28.0171460296506	-0.10363123312261	0.330161521679079	-0.31388040797601	0.753611871121831	0.856777436116806
ENSMUSG00000005506	13046	Celf1	873.448853006685	0.0250709525247826	0.0983089777321472	0.255022004125512	0.798706104161255	0.884360989527238
ENSMUSG00000005510	68349	Ndufs3	3131.27287175486	-0.713178564419734	0.0948922018110846	-7.51567094880526	5.66197983569099e-14	2.80422419498587e-11
ENSMUSG00000005514	18984	Por	332.458188529782	0.157194098200314	0.120972216516107	1.29942314630057	0.1937987525234	0.356855206313931
ENSMUSG00000005533	16001	Igf1r	227.184989932225	-0.00795107808452706	0.124004797732815	-0.0641191165978813	0.94887538032215	0.971366256342464
ENSMUSG00000005534	16337	Insr	534.414372377738	-0.217074909518174	0.110704944277157	-1.96084204671756	0.0498974514694628	0.133874757999265
ENSMUSG00000005540	14128	Fcer2a	1.78251891516317	-0.532694466577427	0.993216406170406	-0.536332729975096	0.591728614052048	NA
ENSMUSG00000005547	13087	Cyp2a5	0	NA	NA	NA	NA	NA
ENSMUSG00000005553	11944	Atp4a	0.0964101638055974	-1.26836817847825	4.32804458550702	-0.293058020410773	0.769477803563898	NA
ENSMUSG00000005566	21849	Trim28	693.016483306711	0.0556867134526517	0.0850080174202788	0.655076016857765	0.512418812526333	0.678905080409403
ENSMUSG00000005575	22192	Ube2m	1466.90222766139	-0.246208867680402	0.0906429501648223	-2.71624949577109	0.00660261402568629	0.028269117690816
ENSMUSG00000005580	11515	Adcy9	149.951264067435	-0.0454832666184482	0.417986046672323	-0.1088152750087	0.913349008058461	0.952892894343134
ENSMUSG00000005583	17260	Mef2c	6364.98553791895	-0.472655914588545	0.0870333891033517	-5.43074237896525	5.61201003934861e-08	2.23723728499001e-06
ENSMUSG00000005609	22083	Ctr9	222.744229875099	-0.399141995670638	0.124111021772507	-3.21600765161902	0.00129987366284569	0.00786565536673453
ENSMUSG00000005610	13690	Eif4g2	6774.35753948424	-0.0295231098037099	0.0672453686450952	-0.439035585625617	0.660635751606714	0.791716580456088
ENSMUSG00000005611	17540	Irag1	62.7112594413894	-0.32349728073998	0.237653341703774	-1.36121494619338	0.173445772234644	0.329783881983987
ENSMUSG00000005615	13026	Pcyt1a	813.760162814929	0.180506686322546	0.181240866173542	0.995949148409538	0.319274853434644	0.499065436547037
ENSMUSG00000005621	233410	Zfp592	219.001080520163	-0.315026503294687	0.140907273026841	-2.23570080186477	0.025371376482343	0.0803312237945397
ENSMUSG00000005625	19185	Psmd4	1489.89681432416	-0.299530972434642	0.0737800329358064	-4.05978366389799	4.91182033771509e-05	0.000562964877977668
ENSMUSG00000005628	50874	Tmod4	3791.04713251079	-0.424336790029177	0.104159909439859	-4.07389745547143	4.62328445398763e-05	0.00053628787165347
ENSMUSG00000005640	23920	Insrr	2.81308388633046	0.237868194918603	0.967438308699357	0.24587427723262	0.805779556473806	NA
ENSMUSG00000005649	29865	Cabp5	0.120743067492745	1.20421012730992	4.30552021184304	0.279689809374845	0.779715497370818	NA
ENSMUSG00000005656	72183	Snx6	321.547135726107	0.256187056383883	0.104507513658569	2.45137452241816	0.0142311794314527	0.0511646275027855
ENSMUSG00000005667	17768	Mthfd2	97.7280500464975	0.612584524224737	0.246342197735717	2.48672184406642	0.0128926158579082	0.047565894713691
ENSMUSG00000005672	16590	Kit	35.9007465760748	0.548046065805413	0.267797126614141	2.04649718514371	0.0407074791277922	0.115550900724109
ENSMUSG00000005674	641376	Tomm40l	153.262992138101	-0.259948274293037	0.159629778066608	-1.62844475160875	0.103430615058869	0.228785857410941
ENSMUSG00000005677	12355	Nr1i3	0.144802404485722	0.174313350024088	4.32804458550702	0.0402753129225603	0.967873635239457	NA
ENSMUSG00000005681	11807	Apoa2	3.96368476564708	-1.02754167333564	0.737533373862667	-1.39321379852157	0.163555148360093	0.31623628827604
ENSMUSG00000005682	103135	Pan2	157.195136807121	0.0588974081050042	0.157606217034543	0.373699776653451	0.708627691513624	0.826209943650926
ENSMUSG00000005683	12974	Cs	7894.51276918734	-0.35150819373006	0.092356338198586	-3.80599968108568	0.000141232563946304	0.0013205406322302
ENSMUSG00000005686	11717	Ampd3	173.643875387434	-0.00828230512408188	0.156899967069081	-0.0527871692951681	0.957901484666835	0.976264459957139
ENSMUSG00000005687	68183	Bcas2	550.399223137769	0.119062786811409	0.12727516153017	0.935475432755087	0.349543338355034	0.529122563867248
ENSMUSG00000005696	20400	Sh2d1a	0.844906758529479	1.95474518056351	1.86782523873855	1.04653537173727	0.29531392279211	NA
ENSMUSG00000005698	13018	Ctcf	390.728524876654	0.211554640905363	0.126405103267173	1.67362420849589	0.0942044776903806	0.214649098476451
ENSMUSG00000005699	56513	Pard6a	66.7715269597931	-0.129524308602823	0.189781453533487	-0.682491920001912	0.494927950221377	0.664566416235473
ENSMUSG00000005705	11604	Agrp	3.10061296105841	0.692239124641931	0.864493526136418	0.80074529619172	0.42327911389022	0.600579376458178
ENSMUSG00000005716	19293	Pvalb	129955.868375107	-0.445367342641894	0.161727213354044	-2.75381819426346	0.00589044796005945	0.0258730130231689
ENSMUSG00000005718	83383	Tfap4	68.2667205824864	0.197741360852858	0.188897709695422	1.04681714337191	0.295183922071939	0.473457910876389
ENSMUSG00000005732	19385	Ranbp1	136.947047955314	0.485965918095966	0.184703886672958	2.63105409880427	0.00851204850778569	0.0345298885111068
ENSMUSG00000005763	12503	Cd247	17.6611130416428	0.466670719674769	0.330442448659563	1.41226020315433	0.157873359761438	0.308314277923401
ENSMUSG00000005774	53970	Rfx5	29.8509162347129	0.851575668039904	0.304009940891993	2.80114415186984	0.00509217668994538	0.0231657624826691
ENSMUSG00000005779	19172	Psmb4	1584.44380585785	-0.0383052431050512	0.115939916591397	-0.330388741265437	0.74110624753987	0.848997021783951
ENSMUSG00000005800	17394	Mmp8	4.362280003348	1.8405017766471	0.731027185411651	2.51769265682053	0.0118126347301816	0.0445159561978528
ENSMUSG00000005802	22785	Slc30a4	245.539512026345	0.142085163059555	0.122194298906523	1.16278062340902	0.24491852068587	0.417713482426156
ENSMUSG00000005803	59010	Sqor	390.270380089428	-0.164940744410618	0.127191333330716	-1.29679232138992	0.194702653423699	0.358156462302412
ENSMUSG00000005804	18457	Bloc1s6	236.614719991227	-0.0901293252916821	0.0983461014157272	-0.916450413328422	0.35943070409472	0.539548830320992
ENSMUSG00000005813	75624	Metap1	626.783009018086	0.0373868631594249	0.122652330472808	0.304819835182124	0.760503373722991	0.860661067728054
ENSMUSG00000005823	78308	Gpr108	349.676078281889	-0.0364135451654321	0.0871353592690373	-0.417896310647006	0.676022930071855	0.803090476020817
ENSMUSG00000005824	50930	Tnfsf14	3.52942515796866	1.26536728903882	0.691430144622134	1.83007249377353	0.0672390993812956	0.16691309846414
ENSMUSG00000005836	14465	Gata6	8.62560969488025	0.235456347138816	0.491178486019487	0.479370236768624	0.631675263319992	0.77126105660406
ENSMUSG00000005846	66409	Rsl1d1	594.897142835922	-0.0878704390845511	0.0738039335780758	-1.19059289694356	0.233813441442131	0.40545855564246
ENSMUSG00000005864	12789	Cnga2	0.15393356017702	0	4.09879908165382	0	1	NA
ENSMUSG00000005871	11789	Apc	312.309514624905	0.0803453710744687	0.108279076196965	0.742021209419226	0.458074485330567	0.63275603348908
ENSMUSG00000005873	13476	Reep5	2044.55171719078	-0.0122998121890163	0.062345620598652	-0.197284301141148	0.843605063799672	0.912319272331227
ENSMUSG00000005881	66366	Ergic3	589.105742327452	0.159389177420275	0.0999474059151233	1.59473050811974	0.110772512707833	0.240306072165758
ENSMUSG00000005882	56046	Uqcc1	1187.19891331817	-0.59644581146311	0.0912498191586149	-6.53640540839143	6.30149607657248e-11	8.5117067665703e-09
ENSMUSG00000005883	26972	Spo11	0.750799402935501	-1.13993464377494	1.73385096073595	-0.657458264631395	0.510886298230226	NA
ENSMUSG00000005886	17978	Ncoa2	202.500088494202	0.452008860006791	0.149122210138473	3.03113037009753	0.00243640025299142	0.012878565890974
ENSMUSG00000005891	19110	Prl4a1	0	NA	NA	NA	NA	NA
ENSMUSG00000005892	22044	Trh	0	NA	NA	NA	NA	NA
ENSMUSG00000005893	22026	Nr2c2	54.79781578773	-0.134377207832131	0.261048711089189	-0.514759131625135	0.60672134704934	0.752747770382672
ENSMUSG00000005897	22025	Nr2c1	83.9719216587619	0.166459277221248	0.190770349031659	0.872563677039889	0.382900946049024	0.562629961541423
ENSMUSG00000005899	77626	Smpd4	164.960433685336	-0.0290325826669295	0.125956392834462	-0.230497095173927	0.817705520443235	0.896748085048763
ENSMUSG00000005907	71382	Pex1	55.5828976469959	-0.0872893977206494	0.201083259961996	-0.434095795627874	0.664218878463936	0.794123812552486
ENSMUSG00000005917	18423	Otx1	0.06689489651356	0	4.32804458550702	0	1	NA
ENSMUSG00000005936	66989	Kctd20	441.946330388824	0.112759348183279	0.103507062467247	1.08938796537637	0.275982836185614	0.452221654425655
ENSMUSG00000005947	16407	Itgae	8.1672643055782	-0.277556986298508	0.446134674247724	-0.622137220709255	0.533851642283174	0.696628442433229
ENSMUSG00000005949	83429	Ctns	90.5598764674993	0.559600873544145	0.170209617783108	3.28771594010172	0.00101003695372954	0.00644845467646706
ENSMUSG00000005950	94045	P2rx5	166.17912804224	-0.563155610672656	0.136572263074019	-4.12349914980497	3.73159838074906e-05	0.000452442462425539
ENSMUSG00000005951	74637	Shpk	19.050203947366	0.149034106347827	0.333728106229241	0.446573433780415	0.655183080620328	0.787802219513898
ENSMUSG00000005952	193034	Trpv1	5.51093027144254	0.0491348452901306	0.539421827925217	0.0910879811429181	0.92742268259912	0.959293482969434
ENSMUSG00000005958	13845	Ephb3	71.6260038607852	0.993497599570002	0.240151807024159	4.13695658542373	3.51942665899538e-05	0.00043314389544142
ENSMUSG00000005968	22156	Tuft1	8.91282647621609	1.50894335669864	0.4715063998808	3.20026060532818	0.00137303378165562	0.00818412258474817
ENSMUSG00000005973	19672	Rcn1	260.955269768388	0.718475653799219	0.146710550218272	4.8972323580703	9.71958833103428e-07	2.26291953963567e-05
ENSMUSG00000005980	13419	Dnase1	8.72191796513926	-0.560530563023218	0.486156714479114	-1.15298327952498	0.248917247523504	0.421657626973943
ENSMUSG00000005981	68015	Trap1	1214.65578181628	-0.238927398984601	0.0831257767977064	-2.87428771421951	0.00404939889824945	0.019368854431662
ENSMUSG00000005982	74763	Naa60	197.869253704153	-0.120908998552676	0.152591961620686	-0.792368072790311	0.428146090018608	0.604782110147374
ENSMUSG00000005983	73261	1700037C18Rik	22.7311953503556	-0.376333263871863	0.283830822404527	-1.32590696346395	0.184870516172339	0.344765371556449
ENSMUSG00000005983	105246059	1700037C18Rik	22.7311953503556	-0.376333263871863	0.283830822404527	-1.32590696346395	0.184870516172339	0.344765371556449
ENSMUSG00000005986	68423	Ankrd13d	11.8030595499978	0.705486433720399	0.425205940954622	1.65916410324965	0.0970827288730179	0.219099712883265
ENSMUSG00000005994	22178	Tyrp1	0.181186003313036	0.174313656722652	3.9004011198939	0.0446912128687405	0.964353437816499	NA
ENSMUSG00000006005	108989	Tpr	691.685350003978	-0.096628931927952	0.11632254144221	-0.830698252719645	0.406144113682856	0.584435586725885
[truncated: 50,400 more rows]

## Sheet: mdx_KO_vs_mdx_LICA1
Differential gene expression analysis, comparison between mdx_KO and mdx_LICA1
[truncated: 51,344 more rows]

[truncated: 2 more sheets: mdx_AAV9_vs_WT, mdx_LICA1_vs_WT]
